# Supplementary material for: Genome plasticity in Candida albicans is driven by long repeat sequences
Source: eLife journal article supplement (doi:10.7554/elife.45954), 2019-06-07
Supplement: supp [file elife-45954-supp-v1.zip]

Archive with 21 entries (21 files):
- elife_poa_e45954_Supplementary_File_6.xlsx
- elife_poa_e45954_Supplementary_File_3.xlsx
- elife_poa_e45954_Figure_4_figure_supplement_1.tif
- elife_poa_e45954_Supplementary_File_7.xlsx
- elife_poa_e45954_Figure_6_figure_supplement_1.tif
- elife_poa_e45954_Figure_1_figure_supplement_2.pdf
- elife_poa_e45954_Figure_2_source_data_1.xlsx
- elife_poa_e45954_Figure_2_source_data_2.xlsx
- elife_poa_e45954_Figure_1_source_data_1.xlsx
- elife_poa_e45954_Figure_2_source_data_3.xlsx
- elife_poa_e45954_Figure_6_source_data_1.xlsx
- elife_poa_e45954_Figure_1_figure_supplement_1.tif
- elife_poa_e45954_Supplementary_File_2.xlsx
- elife_poa_e45954_Supplementary_File_4.xlsx
- elife_poa_e45954_Supplementary_File_1.xlsx
- elife_poa_e45954_Figure_2_figure_supplement_2.tif
- elife_poa_e45954_Figure_2_figure_supplement_1.tif
- elife_poa_e45954_Transparent_Reporting_File.pdf
- elife_poa_e45954_Figure_3_figure_supplement_1.tif
- elife_poa_e45954_Figure_2_figure_supplement_3.tif
- elife_poa_e45954_Supplementary_File_5.xlsx
