# Supplementary material for: Genome plasticity in Candida albicans is driven by long repeat sequences
Source: eLife journal article supplement (doi:10.7554/elife.45954), 2019-06-07
Supplement: supp [file elife-45954-supp-v1.zip › elife_poa_e45954_Figure_1_figure_supplement_2.pdf]

>SC5314\_CEN4\_Reference\_PCR\_Primer2&3\_Sanger\_Primer2

TCACAAGTATTCTTCTTCATCATCAATATGGTTTTACTAAAACGGTAATTTACAATAAACCTCAAACGTCTGGAGATATTTCCCAA  
ATCGCAAACAAGAATAGCCTCTACCTTCAATTCTGGTCATTTTCATCAGTTTAAAAATCCAACCTCCACACATCAAACTGTCAAAGA  
GATAGTGACCAATGGAAAAATCAATGCAATTAATCCTATAACAAATACCACAGTTCTATGATCAAAAACTCCCAGTTCCAACACAAT  
TCCATTTCATACCAACCATGCAAAACCTCTGATAGTACAACCTAAGAGAAGTCAACGGCACGACTTAAACCCACAACAAAAAGACAA  
TTGAATAAATGATCCTCCTGTCAACGACCAACCTTAATTTGTAACCTTCACAAATATCACCAAGAGAAATGTCACCAATATAAATA  
GGGACCACCGGAACCTCAAGACAAGGCTCACACCGGCCCTATCTCATTTGATTTAGCTCCTATCTCTACCCGCAACCACAGCCAGCT  
TGTCTATGCCACACAAAGGGATTCTTTACCTCTCCAAAACGTCTATACCACCGCTGTTAAATTGGTATGTTTCATGCGTAATTCTGA  
TAACCAAATCAAAACAGTACGCATGCTGGATCTTCTTCCCTTTGGGAAACAACACACGTAGTTTTCTAAATTCCTTCATAACAGCT  
ATTTTTTGAAATGTTTCCAAGGTCAATTCTCTTTCTCTAGCCAAGTGCGGCCACCAAATTACGGGTATCATCATTGACTAGCCCTA  
CTCTCTAAGCTAGAATTAGCTGAAGTTATACAACCACCTCTATGATCTTAGGACCACAGTAACACAAAAATGCAATCATCATTATC  
TAAATGGCAACAGAGTGACAACCTCATATAATCTAATACTTCTTTCCCTATATCT

>SC5314\_CEN4\_Reference\_Primer2&3\_Sanger\_Primer3

TCATAATGTTTTGTAACGCCATGAGAAATCAGGGATATGACTTTCTCATACATTATTTTTAATAAGTCAAACCTGTGTGATCGTTGT  
GGTTTGATTTTTACAATGGGCATTTCTGATGCAAGATCTTCAAGATCTTCAAGAAAAATATCAAACTGACTAGATCAATGAGTAT  
ACCATTGGCAGAAACAGATACTTTCTTAATAACTTAGGTCATTATCTAGTTGTGCTAGTTAAATCAAAAATTTCTTGAAACACATTT  
AGTCAGTACTAAGTTTAAGGAAGCGTATGGTGTAGTAACATTATTCGAATTGGCGATTAGGATTTGATATCACTGATGGTGTAGGTG  
AGCCTAGGCTTAATTTGATCTTTATGGAAATTACAGTATTTGGGACGATATTTTGAACCTCCCTAATAATAGTAGATGGTAGAGTTC  
CTCCTGCACTAGATATACTGTAGTGACAGAATTGCCAAAGATTGTATGAAGTACTGAATTTCTGTGATTGCTTGCTTAGAACTGC  
CAATTTGTTCTGTGGCTCTTGATATACTGGTAGAAAAGTTAATTTTTAATGAGCGGCTTGCAAGATGTATTTAGTTTGGTCCCAAAG  
AAGCTCTTTGCGTTGCCTGGCTAATGGGGATTACAGTGCGCAAAGGTTTCAATTTACAGCATATTGATTCGTATGACAATTAATATG  
TAATGTTTATAATCGACGTGAAGATACTAGGTCTCAGTGAGTTGTTGTTGNNNTATAGTATTGGTTGGTATAGTTTAGTTAGAGG  
CTTGATCAGCAGCAATACGTTGATAATTTTTTTCAAATTTGATTTTCTTCTACGAAGGGTAACAGGTTTTCAAATGTGAAGTAT  
CCTGGAATTACAGTAGAGTAGGATTACCTAATCGACGTGAA

>SC5314\_CEN4\_Inversion\_Primer2&4\_Sanger\_Primer2

CGTCCTCACAAGTATTCTTCTTCNTCATCAATATGGTTTTACTAAAACGGTAATTTACAATAAACCTCAAACGTCTGGAGATATTT  
CCCAAATCGCAAACAAGAATAGCCTCTACCTTCAATTCTGGTCATTTTCATCAGTTTAAAAATCCAACCTCCACACATCAAACTGTC  
AAAGAGATAGTGACCAATGGAAATCAATGCAATTAATCCTATAACAAATACCACAGTTCTATGATCAAAAACTCCCAGTTCCAAC  
ACAATTCCATTTCATACCAACCATGCAAAACCTCTGATAGTACAACCTAAGAAGAACTCAACGGCACGACTTAAACCCACAACAAAA  
GACAATTGAATAAATGATCCTCCTGTCAACGACCAACCTTAATTTGTAACCTTCACAAATATCACCAAGAGAAATGTCACCAATAT  
AAATAGGGACCACCGGAACCTCAAGACAAGGCTCACACCGGCCCTATCTCATTTGATTTAGCTCCTATCTCTACCCGCAACCACAGC  
CAGCTTGTCTATGCCACACAAAGGGATTCTTTACCTCTCCAAAACGTCTATACCACCGCTGTTAAATTGGTATGTTTCATGCGTAAT  
TCTGATAACCAAATCAAAACAGTACGCATGCTGGATCTTCTTCCCTTTGGGAAACAACACACGTAGTTTTCTAAATTCCTTCATAA  
CAGCTATTTTTTGAATGTTTCCAAGGTCAATTCTTTCTTCTAGCCAAGTGCGGCCACCAAATTACGGGTATCATCATTGACTA  
GCCTACTCTCTAAGCTAGAATTAGCTGAAGTTATACAACCACCTCTATGATCTTAGGACCACAGTAACACAAAAATGCTGTCAAAC  
CTAGCACGCTAGTATGAGTCAACCACTGATAAGATCATATTTGAAATCTACAGTATATACACAACACCATTCAAAACAGCG

>SC5314\_CEN4\_Inversion\_Primer2&4\_Sanger\_Primer4

AGAATTGGTTGAGTTGAATTTCTGATTAATTTAGAATGGTAGTGAATTTTGAAATCTTAACTGTGAGGTAAGATATTTATCGCTG  
TTTTGAATGGTGTGTGTATATACTGTAGATTTCAAATATGATCTTATCAGTGGTTGACTCATACTAGCGTGCTAGGTTTGACAGC  
ATTTTTGTGTTACTGTGGTCCTAAGATCATAGAGGTGGTTGTATAACTTCAGCTAATTCTAGCTTAGAGAGTAGGCTAGTCAATGA  
TGATACCCGTAATTTGGTGGCCGCACTTGGCTAGAAGAAAGAGAATTGACCTTGGAACATTTCAAAAAATAGCTGTTATGAAGGA  
ATTTAGAAAACACGTGTGTTGTTTCCCAAAGGGAAGAAGATCCAGCATGCGTACTGTTTTGATTTGGTTATCAGAATTACGCATG  
AACATACCAATTTAACAGCGGTGGTATAGACGTTTTGGAGAGGTAAAGAATCCCTTTGTGTGGCATAGACAAGCTGGCTGTGGTTG  
CGGGTAGAGATAGGAGCTAAATCAAATGAGATAGGGCCGGTGTGAGCCTTGCTTGAGTTCGGTGGTCCCTATTTATATTGGTGA  
CATTTCTCTTGGTGATATTTGTGAAGTTACAAATTAAGGGTTGGTCGTTGACAGGAGGATCATTTATTCAATTGCTTTTTTGTGTTG  
GGGTTTAAGTCGTGCCNTTGAGTTCCTTAGTTGTACTATCAGAGGTTTTGCATGGTTGGTATGAATGGAATTTGTTGGAAGTGA  
GGAGTTTTTGATCATAGAAGTGTGGTATTTGTTATAGGATTAATTGCATTGA
