# Supplementary material for: Genome plasticity in Candida albicans is driven by long repeat sequences
Source: eLife journal article supplement (doi:10.7554/elife.45954), 2019-06-07
Supplement: supp [file elife-45954-supp-v1.zip › elife_poa_e45954_Figure_1_source_data_1.xlsx]

## Sheet: Growth Curve 0 ug FLC
These data were used to generate the growth curves for cells grown in YPAD medium for 24 hours.
These data were used to generate Figure 1D and Figure 1-figure supplment 1B.
Each Column is a separate biological replicate conducted on separate days. Averages between the three biological replicates are plotted along with the SEM fo each timepoint.
Time	P78042 Biol1	P78042 Biol2	P78042 Biol3	AMS3743 Biol1	AMS3743 Biol2	AMS3743 Biol3	AMS3743_10 S1 Biol1	AMS3743_10 S1 Biol2	AMS3743_10 S1 Biol3	AMS3743_10 S6 Biol1	AMS3743_10 S6 Biol2	AMS3743_10 S6 Biol3			Figure 1D
00:14:16	0.002	0.002	0.002	0.002	0.003	0.002	0.003	0.001	0	0	0.003	0.003			Null Hypothesis: There is no significant difference in the average maximum slope between P78042 and AMS3743 in YPAD.
00:29:16	0.002	0.002	0.002	0.002	0.002	0.002	0.003	0	0	0	0.002	0.002			Table Analyzed	0ug FLC
00:44:16	0.002	0.002	0.002	0.002	0.002	0.002	0.003	0	0	0	0.002	0.002
00:59:16	0.002	0.002	0.002	0.002	0.002	0.001	0.003	0	0	0	0.002	0.002			AMS3743
01:14:16	0.002	0.002	0.002	0.002	0.002	0.002	0.003	0	0	0	0.002	0.003			vs.
01:29:16	0.002	0.002	0.002	0.002	0.002	0.002	0.003	0	0	0	0.002	0.003			P78042
01:44:16	0.002	0.002	0.002	0.002	0.002	0.002	0.003	0	0	0	0.002	0.003
01:59:16	0.002	0.002	0.002	0.002	0.002	0.002	0.003	0	0	0	0.002	0.003			Unpaired t test
02:14:16	0.002	0.002	0.002	0.002	0.003	0.002	0.003	0.001	0.001	0	0.002	0.003			P value	0.7505
02:29:16	0.002	0.002	0.002	0.002	0.002	0.002	0.003	0.001	0.001	0	0.002	0.003			P value summary	ns
02:44:16	0.002	0.002	0.002	0.002	0.003	0.002	0.003	0.001	0.001	0.001	0.002	0.003			Significantly different? (P < 0.05)	No
02:59:16	0.002	0.002	0.002	0.002	0.003	0.002	0.003	0.001	0.001	0.001	0.003	0.003			One- or two-tailed P value?	Two-tailed
03:14:16	0.003	0.003	0.002	0.002	0.003	0.003	0.003	0.001	0.004	0.001	0.003	0.003			t, df	t=0.3406 df=4
03:29:16	0.003	0.003	0.003	0.002	0.003	0.003	0.003	0.001	0.006	0.001	0.003	0.004
03:44:16	0.003	0.003	0.003	0.003	0.003	0.003	0.004	0.001	0.009	0.001	0.003	0.004			How big is the difference?
03:59:16	0.004	0.003	0.003	0.003	0.003	0.004	0.004	0.003	0.012	0.001	0.003	0.004			Mean ± SEM of column A	0.04636 ± 0.0002402 N=3
04:14:16	0.004	0.004	0.003	0.003	0.004	0.005	0.004	0.006	0.015	0.002	0.003	0.004			Mean ± SEM of column B	0.04600 ± 0.001007 N=3
04:29:16	0.005	0.004	0.004	0.004	0.004	0.007	0.005	0.009	0.018	0.002	0.004	0.005			Difference between means	-0.0003526 ± 0.001035
04:44:16	0.005	0.005	0.004	0.004	0.004	0.01	0.005	0.012	0.021	0.003	0.004	0.005			95% confidence interval	-0.003227 to 0.002521
04:59:16	0.006	0.005	0.005	0.004	0.005	0.013	0.006	0.015	0.024	0.003	0.004	0.006			R square	0.02818
05:14:16	0.007	0.006	0.005	0.005	0.005	0.016	0.006	0.017	0.026	0.004	0.005	0.007
05:29:16	0.008	0.007	0.006	0.006	0.006	0.02	0.007	0.02	0.029	0.005	0.006	0.007			F test to compare variances
05:44:16	0.01	0.008	0.007	0.007	0.008	0.023	0.008	0.024	0.032	0.006	0.006	0.009			F,DFn, Dfd	17.57, 2, 2
05:59:16	0.011	0.009	0.008	0.008	0.01	0.027	0.01	0.027	0.036	0.007	0.007	0.01			P value	0.1077
06:14:16	0.013	0.01	0.009	0.009	0.012	0.031	0.011	0.03	0.039	0.009	0.008	0.012			P value summary	ns
06:29:16	0.016	0.012	0.011	0.011	0.015	0.036	0.013	0.034	0.042	0.011	0.01	0.014			Significantly different? (P < 0.05)	No
06:44:16	0.019	0.014	0.012	0.013	0.018	0.041	0.015	0.036	0.046	0.013	0.012	0.016
06:59:16	0.023	0.017	0.014	0.016	0.021	0.046	0.018	0.04	0.05	0.016	0.014	0.019			Figure 1-figure supplement 1B
07:14:16	0.027	0.02	0.017	0.019	0.025	0.053	0.021	0.045	0.054	0.02	0.016	0.023			Null Hypothesis: There is no significant difference in the average maximum slope between all strains in YPAD.
07:29:16	0.032	0.024	0.02	0.023	0.029	0.06	0.025	0.05	0.059	0.025	0.02	0.028			Table Analyzed	0ug FLC
07:44:16	0.038	0.028	0.024	0.027	0.034	0.068	0.03	0.056	0.065	0.031	0.025	0.033
07:59:16	0.044	0.033	0.029	0.033	0.04	0.077	0.036	0.062	0.071	0.039	0.03	0.04			ANOVA summary
08:14:16	0.052	0.039	0.034	0.039	0.046	0.088	0.042	0.07	0.079	0.047	0.036	0.049			F	0.0986
08:29:16	0.061	0.047	0.041	0.047	0.053	0.099	0.05	0.078	0.087	0.057	0.044	0.059			P value	0.9586
08:44:16	0.072	0.055	0.048	0.056	0.061	0.113	0.059	0.088	0.097	0.069	0.053	0.07			P value summary	ns
08:59:16	0.084	0.065	0.056	0.067	0.071	0.128	0.07	0.099	0.108	0.083	0.062	0.084			Are differences among means statistically significant? (P < 0.05)	No
09:14:16	0.097	0.075	0.067	0.079	0.082	0.145	0.082	0.112	0.12	0.1	0.074	0.098			R square	0.03566
09:29:16	0.112	0.088	0.078	0.093	0.094	0.164	0.097	0.126	0.134	0.12	0.087	0.119
09:44:16	0.129	0.102	0.092	0.109	0.108	0.186	0.113	0.143	0.15	0.144	0.102	0.138			Brown-Forsythe test
09:59:16	0.149	0.119	0.106	0.126	0.123	0.209	0.131	0.16	0.167	0.17	0.119	0.16			F (DFn, DFd)	0.7077 (3, 8)
10:14:16	0.17	0.138	0.124	0.147	0.14	0.235	0.151	0.179	0.187	0.199	0.139	0.188			P value	0.5739
10:29:16	0.195	0.158	0.142	0.17	0.159	0.263	0.175	0.2	0.209	0.232	0.161	0.219			P value summary	ns
10:44:16	0.222	0.181	0.163	0.195	0.181	0.296	0.2	0.224	0.233	0.268	0.189	0.253			Significantly different standard deviations? (P < 0.05)	No
10:59:16	0.252	0.206	0.187	0.223	0.205	0.332	0.23	0.251	0.26	0.308	0.218	0.29
11:14:16	0.286	0.234	0.213	0.254	0.231	0.37	0.261	0.281	0.289	0.35	0.259	0.334			Bartlett's test
11:29:16	0.323	0.267	0.242	0.29	0.261	0.412	0.296	0.314	0.322	0.396	0.299	0.377			Bartlett's statistic (corrected)
11:44:15	0.364	0.302	0.274	0.327	0.291	0.457	0.335	0.352	0.359	0.444	0.345	0.427			P value
11:59:16	0.408	0.34	0.309	0.368	0.325	0.505	0.377	0.392	0.398	0.495	0.395	0.48			P value summary
12:14:16	0.456	0.38	0.347	0.411	0.362	0.555	0.422	0.436	0.441	0.549	0.449	0.53			Significantly different standard deviations? (P < 0.05)
12:29:16	0.506	0.425	0.388	0.458	0.401	0.61	0.471	0.481	0.487	0.6	0.504	0.581
12:44:16	0.559	0.473	0.432	0.506	0.443	0.665	0.521	0.53	0.534	0.655	0.566	0.637			ANOVA table	SS	DF	MS	F (DFn, DFd)	P value
12:59:16	0.613	0.521	0.481	0.557	0.489	0.72	0.573	0.583	0.585	0.707	0.628	0.69			Treatment (between columns)	4.2e-07	3	1.4e-07	F (3, 8) = 0.09860	P = 0.9586
13:14:16	0.669	0.575	0.53	0.612	0.536	0.776	0.626	0.637	0.639	0.759	0.689	0.749			Residual (within columns)	1.136e-05	8	1.42e-06
13:29:16	0.725	0.628	0.582	0.666	0.584	0.832	0.68	0.69	0.693	0.808	0.751	0.797			Total	1.178e-05	11
13:44:16	0.78	0.683	0.635	0.718	0.635	0.889	0.733	0.747	0.747	0.859	0.812	0.851
13:59:16	0.835	0.738	0.694	0.774	0.685	0.942	0.787	0.802	0.802	0.903	0.869	0.903			Data summary
14:14:16	0.888	0.792	0.746	0.826	0.735	0.992	0.839	0.856	0.855	0.948	0.924	0.948			Number of treatments (columns)	4
14:29:16	0.939	0.847	0.801	0.88	0.789	1.039	0.89	0.911	0.909	0.987	0.976	0.992			Number of values (total)	12
14:44:16	0.989	0.901	0.854	0.929	0.839	1.084	0.938	0.962	0.961	1.024	1.02	1.03
14:59:16	1.035	0.951	0.906	0.979	0.888	1.127	0.986	1.011	1.011	1.06	1.061	1.068
15:14:16	1.077	0.998	0.955	1.022	0.935	1.168	1.028	1.057	1.057	1.089	1.092	1.097
15:29:16	1.116	1.043	1.003	1.066	0.982	1.203	1.069	1.099	1.1	1.108	1.113	1.119
15:44:16	1.152	1.085	1.047	1.105	1.024	1.236	1.107	1.14	1.141	1.123	1.127	1.133			Tukey's multiple comparisons test	Mean Diff.	95% CI of diff.	Significant?	Summary
15:59:16	1.182	1.121	1.086	1.142	1.065	1.266	1.142	1.176	1.178	1.134	1.136	1.143
16:14:15	1.204	1.151	1.121	1.175	1.102	1.291	1.173	1.209	1.211	1.141	1.141	1.15			P78042 vs. AMS3743	0.0003526	-0.002763 to 0.003468	No	ns
16:29:16	1.222	1.173	1.147	1.201	1.136	1.312	1.199	1.231	1.235	1.145	1.145	1.153			P78042 vs. AMS3743_1	-0.0001595	-0.003275 to 0.002956	No	ns
16:44:16	1.233	1.188	1.167	1.223	1.163	1.327	1.217	1.248	1.253	1.148	1.147	1.155			P78042 vs. AMS3743_6	0.0001241	-0.002991 to 0.003240	No	ns
16:59:16	1.241	1.199	1.18	1.237	1.182	1.338	1.232	1.261	1.265	1.148	1.146	1.156			AMS3743 vs. AMS3743_1	-0.0005121	-0.003628 to 0.002603	No	ns
17:14:16	1.246	1.206	1.19	1.248	1.195	1.345	1.242	1.27	1.274	1.149	1.148	1.157			AMS3743 vs. AMS3743_6	-0.0002285	-0.003344 to 0.002887	No	ns
17:29:16	1.25	1.211	1.197	1.257	1.205	1.351	1.249	1.277	1.282	1.151	1.147	1.157			AMS3743_1 vs. AMS3743_6	0.0002836	-0.002832 to 0.003399	No	ns
17:44:16	1.253	1.215	1.201	1.262	1.211	1.355	1.254	1.282	1.286	1.151	1.147	1.157
17:59:16	1.255	1.216	1.204	1.267	1.217	1.358	1.257	1.285	1.291	1.15	1.146	1.155
18:14:16	1.255	1.217	1.206	1.27	1.22	1.359	1.26	1.288	1.293	1.151	1.147	1.157			Test details	Mean 1	Mean 2	Mean Diff.	SE of diff.	n1	n2	q	DF
18:29:16	1.257	1.219	1.207	1.271	1.223	1.361	1.261	1.289	1.294	1.151	1.146	1.157
18:44:16	1.257	1.219	1.208	1.272	1.223	1.362	1.261	1.29	1.295	1.152	1.147	1.157			P78042 vs. AMS3743	0.04636	0.046	0.0003526	0.0009729	3	3	0.5125	8
18:59:16	1.257	1.22	1.208	1.273	1.224	1.362	1.261	1.291	1.296	1.151	1.147	1.157			P78042 vs. AMS3743_1	0.04636	0.04651	-0.0001595	0.0009729	3	3	0.2318	8
19:14:16	1.257	1.22	1.209	1.273	1.225	1.362	1.262	1.292	1.296	1.151	1.146	1.155			P78042 vs. AMS3743_6	0.04636	0.04623	0.0001241	0.0009729	3	3	0.1804	8
19:29:16	1.258	1.221	1.209	1.273	1.225	1.363	1.262	1.293	1.297	1.151	1.147	1.155			AMS3743 vs. AMS3743_1	0.046	0.04651	-0.0005121	0.0009729	3	3	0.7443	8
19:44:16	1.257	1.221	1.21	1.273	1.224	1.364	1.262	1.293	1.296	1.152	1.147	1.156			AMS3743 vs. AMS3743_6	0.046	0.04623	-0.0002285	0.0009729	3	3	0.3321	8
19:59:16	1.259	1.221	1.209	1.273	1.225	1.363	1.263	1.294	1.298	1.151	1.147	1.156			AMS3743_1 vs. AMS3743_6	0.04651	0.04623	0.0002836	0.0009729	3	3	0.4122	8
20:14:16	1.258	1.222	1.21	1.274	1.225	1.364	1.262	1.295	1.298	1.153	1.147	1.156
20:29:16	1.259	1.221	1.211	1.274	1.224	1.364	1.262	1.295	1.297	1.152	1.147	1.155
20:44:16	1.258	1.222	1.211	1.274	1.224	1.364	1.263	1.294	1.298	1.151	1.147	1.155
20:59:16	1.259	1.223	1.212	1.274	1.224	1.365	1.262	1.295	1.299	1.152	1.147	1.156
21:14:16	1.259	1.223	1.212	1.275	1.224	1.366	1.263	1.296	1.3	1.152	1.147	1.156
21:29:16	1.259	1.223	1.212	1.274	1.224	1.366	1.262	1.297	1.3	1.151	1.147	1.156
21:44:16	1.259	1.224	1.213	1.275	1.223	1.365	1.264	1.297	1.301	1.152	1.146	1.155
21:59:16	1.26	1.224	1.213	1.275	1.223	1.366	1.263	1.298	1.302	1.152	1.147	1.156
22:14:16	1.26	1.224	1.213	1.275	1.223	1.366	1.264	1.298	1.302	1.153	1.147	1.156
22:29:16	1.26	1.224	1.214	1.276	1.222	1.366	1.263	1.298	1.303	1.152	1.148	1.156
22:44:16	1.26	1.225	1.214	1.276	1.223	1.366	1.263	1.299	1.304	1.153	1.148	1.156
22:59:16	1.26	1.224	1.214	1.276	1.224	1.366	1.264	1.299	1.304	1.153	1.148	1.156
23:14:16	1.261	1.225	1.215	1.276	1.223	1.367	1.264	1.3	1.305	1.155	1.148	1.157
23:29:16	1.261	1.225	1.214	1.276	1.223	1.367	1.264	1.301	1.306	1.154	1.148	1.157
23:44:16	1.261	1.226	1.215	1.276	1.223	1.367	1.264	1.3	1.306	1.155	1.148	1.156
23:59:16	1.261	1.227	1.216	1.276	1.222	1.367	1.264	1.301	1.307	1.155	1.148	1.157
Max Slope	0.0467938	0.0463054	0.0459662	0.0465769	0.0440438	0.0473869	0.0460138	0.0469177	0.0466123	0.0450877	0.0479308	0.0456746

## Sheet: Growth Curve 32 ug FLC
These data were used to generate the growth curves for cells grown in YPAD + 32 μg/ml FLC medium for 24 hours.
These data were used to generate Figure 1D and Figure 1-figure supplment 1B.
Each Column is a separate biological replicate conducted on separate days. Averages between the three biological replecates are plotted along with the SEM fo each timepoint.
Time	P78042 Biol1	P78042 Biol2	P78042 Biol3	AMS3743 Biol1	AMS3743 Biol2	AMS3743 Biol3	AMS3743_10 S1 Biol1	AMS3743_10 S1 Biol2	AMS3743_10 S1 Biol3	AMS3743_10 S6 Biol1	AMS3743_10 S6 Biol2	AMS3743_10 S6 Biol3			Figure 1D
00:14:16	0	0.004	0.001	0.002	0.002	0.001	0	0.004	0.002	0.005	0.003	0.002			Null Hypothesis: There is no significant difference in the average maximum slope between P78042 and AMS3743 in YPAD+32 ug/ml FLC.
00:29:16	0	0.004	0	0.002	0.002	0.001	0	0.004	0.002	0.006	0.003	0.002			Table Analyzed	32 ug FLC
00:44:16	0	0.004	0	0.002	0.002	0.001	0	0.004	0.002	0.006	0.003	0.002
00:59:16	0	0.003	0	0.002	0.002	0.001	0	0.004	0.002	0.006	0.003	0.002			AMS3743
01:14:16	0.001	0.004	0	0.002	0.002	0.001	0	0.004	0.002	0.006	0.003	0.002			vs.
01:29:16	0.001	0.003	0	0.002	0.002	0.001	0	0.004	0.002	0.006	0.003	0.002			P78042
01:44:16	0.001	0.003	0	0.002	0.002	0.001	0	0.004	0.002	0.006	0.003	0.003
01:59:16	0.001	0.003	0	0.002	0.002	0.001	0	0.004	0.002	0.006	0.003	0.003			Unpaired t test
02:14:16	0.001	0.004	0	0.002	0.003	0.001	0.001	0.004	0.002	0.007	0.003	0.003			P value	0.0005
02:29:16	0.001	0.004	0.001	0.002	0.003	0.001	0.001	These	0.002	0.007	0.003	0.003			P value summary	***
02:44:16	0.001	0.004	0.001	0.003	0.003	0.001	0.001	0.004	0.002	0.004	0.003	0.003			Significantly different? (P < 0.05)	Yes
02:59:16	0.001	0.004	0.001	0.003	0.003	0.001	0.003	0.007	0.004	0.005	0.003	0.003			One- or two-tailed P value?	Two-tailed
03:14:16	0.001	0.004	0.001	0.003	0.003	0.001	0.005	0.01	0.007	0.005	0.003	0.003			t, df	t=10.19 df=4
03:29:16	0.001	0.004	0.001	0.003	0.003	0.002	0.007	0.013	0.009	0.006	0.004	0.004
03:44:16	0.002	0.005	0.001	0.004	0.004	0.003	0.009	0.016	0.012	0.006	0.004	0.004			How big is the difference?
03:59:16	0.002	0.005	0.002	0.007	0.006	0.006	0.011	0.019	0.014	0.006	0.004	0.004			Mean ± SEM of column A	0.001914 ± 2.511e-006 N=3
04:14:16	0.002	0.005	0.002	0.01	0.009	0.01	0.014	0.022	0.016	0.007	0.004	0.005			Mean ± SEM of column B	0.003052 ± 0.0001118 N=3
04:29:16	0.003	0.006	0.002	0.013	0.011	0.013	0.016	0.024	0.019	0.008	0.005	0.005			Difference between means	0.001139 ± 0.0001118
04:44:16	0.003	0.006	0.003	0.016	0.013	0.015	0.018	0.027	0.021	0.008	0.005	0.006			95% confidence interval	0.0008285 to 0.001449
04:59:16	0.003	0.006	0.003	0.019	0.016	0.018	0.021	0.029	0.024	0.009	0.005	0.007			R square	0.9629
05:14:16	0.004	0.007	0.003	0.021	0.018	0.021	0.023	0.032	0.026	0.01	0.006	0.007
05:29:16	0.004	0.007	0.004	0.024	0.02	0.024	0.025	0.035	0.029	0.011	0.006	0.008			F test to compare variances
05:44:16	0.005	0.008	0.004	0.027	0.022	0.027	0.028	0.037	0.031	0.012	0.007	0.009			F,DFn, Dfd	1981, 2, 2
05:59:16	0.005	0.009	0.005	0.029	0.024	0.029	0.03	0.04	0.034	0.013	0.007	0.01			P value	0.001
06:14:16	0.006	0.009	0.005	0.032	0.026	0.032	0.033	0.043	0.036	0.014	0.008	0.01			P value summary	**
06:29:16	0.006	0.01	0.006	0.035	0.028	0.035	0.036	0.046	0.039	0.014	0.008	0.011			Significantly different? (P < 0.05)	Yes
06:44:16	0.007	0.01	0.006	0.037	0.03	0.038	0.038	0.048	0.042	0.015	0.009	0.012
06:59:16	0.008	0.011	0.007	0.04	0.032	0.04	0.04	0.051	0.043	0.016	0.009	0.012			Figure 1-figure supplement 1B
07:14:16	0.008	0.011	0.007	0.042	0.035	0.043	0.043	0.054	0.046	0.017	0.009	0.013			Null Hypothesis: There is no significant difference in the average maximum slopes between all strains in YPAD+32 ug/ml FLC.
07:29:16	0.009	0.012	0.008	0.044	0.037	0.046	0.045	0.057	0.048	0.018	0.01	0.014			Table Analyzed	32 ug FLC
07:44:16	0.009	0.013	0.008	0.047	0.039	0.048	0.048	0.059	0.05	0.018	0.011	0.015
07:59:16	0.01	0.013	0.009	0.048	0.041	0.051	0.05	0.062	0.052	0.019	0.011	0.015			ANOVA summary
08:14:16	0.01	0.014	0.009	0.05	0.043	0.053	0.053	0.065	0.055	0.02	0.011	0.016			F	18.25
08:29:16	0.011	0.015	0.01	0.052	0.045	0.056	0.055	0.066	0.058	0.021	0.012	0.017			P value	0.0006
08:44:16	0.012	0.016	0.01	0.055	0.048	0.059	0.058	0.069	0.06	0.022	0.012	0.017			P value summary	***
08:59:16	0.012	0.016	0.011	0.057	0.05	0.062	0.061	0.071	0.063	0.023	0.013	0.018			Are differences among means statistically significant? (P < 0.05)	Yes
09:14:16	0.013	0.017	0.012	0.059	0.052	0.065	0.062	0.073	0.066	0.024	0.014	0.019			R square	0.8725
09:29:16	0.014	0.018	0.013	0.062	0.054	0.067	0.065	0.076	0.069	0.025	0.014	0.02
09:44:16	0.015	0.019	0.013	0.064	0.057	0.07	0.066	0.078	0.071	0.026	0.015	0.021			Brown-Forsythe test
09:59:16	0.016	0.02	0.014	0.066	0.059	0.073	0.068	0.081	0.074	0.028	0.016	0.022			F (DFn, DFd)	0.5760 (3, 8)
10:14:16	0.017	0.021	0.015	0.069	0.061	0.076	0.069	0.084	0.077	0.029	0.017	0.023			P value	0.6468
10:29:16	0.018	0.022	0.016	0.072	0.064	0.079	0.072	0.086	0.081	0.031	0.018	0.025			P value summary	ns
10:44:16	0.019	0.024	0.017	0.074	0.066	0.082	0.075	0.089	0.084	0.032	0.019	0.026			Significantly different standard deviations? (P < 0.05)	No
10:59:16	0.02	0.025	0.018	0.077	0.069	0.085	0.077	0.092	0.088	0.034	0.02	0.028
11:14:16	0.021	0.026	0.019	0.08	0.072	0.089	0.08	0.095	0.092	0.036	0.022	0.029			Bartlett's test
11:29:16	0.023	0.028	0.02	0.083	0.074	0.092	0.084	0.098	0.096	0.038	0.023	0.031			Bartlett's statistic (corrected)
11:44:15	0.024	0.03	0.022	0.087	0.078	0.096	0.087	0.102	0.1	0.04	0.024	0.033			P value
11:59:16	0.026	0.031	0.023	0.09	0.082	0.1	0.09	0.105	0.104	0.043	0.026	0.035			P value summary
12:14:16	0.027	0.033	0.025	0.093	0.085	0.104	0.094	0.109	0.108	0.045	0.028	0.038			Significantly different standard deviations? (P < 0.05)
12:29:16	0.029	0.035	0.026	0.097	0.089	0.108	0.098	0.112	0.112	0.048	0.03	0.04
12:44:16	0.031	0.037	0.028	0.099	0.092	0.112	0.102	0.115	0.117	0.051	0.032	0.043			ANOVA table	SS	DF	MS	F (DFn, DFd)	P value
12:59:16	0.033	0.04	0.03	0.102	0.096	0.115	0.106	0.119	0.121	0.055	0.035	0.046			Treatment (between columns)	3.649e-06	3	1.216e-06	F (3, 8) = 18.25	P = 0.0006
13:14:16	0.035	0.042	0.032	0.106	0.1	0.119	0.11	0.123	0.125	0.058	0.038	0.049			Residual (within columns)	5.333e-07	8	6.666e-08
13:29:16	0.037	0.044	0.034	0.109	0.103	0.122	0.114	0.126	0.129	0.061	0.041	0.052			Total	4.182e-06	11
13:44:16	0.04	0.047	0.037	0.113	0.107	0.126	0.118	0.13	0.133	0.065	0.044	0.054
13:59:16	0.042	0.049	0.039	0.116	0.111	0.13	0.122	0.133	0.137	0.068	0.047	0.058			Data summary
14:14:16	0.045	0.052	0.041	0.119	0.114	0.134	0.126	0.136	0.141	0.072	0.049	0.062			Number of treatments (columns)	4
14:29:16	0.047	0.054	0.044	0.122	0.117	0.136	0.13	0.14	0.145	0.075	0.052	0.064			Number of values (total)	12
14:44:16	0.05	0.057	0.047	0.125	0.12	0.139	0.134	0.143	0.148	0.078	0.055	0.067
14:59:16	0.052	0.059	0.049	0.129	0.124	0.143	0.137	0.147	0.153	0.081	0.058	0.069
15:14:16	0.054	0.062	0.052	0.132	0.127	0.146	0.141	0.15	0.156	0.083	0.061	0.072			Tukey's multiple comparisons test	Mean Diff.	95% CI of diff.	Significant?	Summary
15:29:16	0.056	0.063	0.054	0.135	0.13	0.15	0.144	0.154	0.159	0.086	0.063	0.074
15:44:16	0.058	0.065	0.056	0.138	0.133	0.153	0.148	0.157	0.163	0.088	0.066	0.077			P78042 vs. AMS3743	-0.001139	-0.001814 to -0.0004637	Yes	**
15:59:16	0.06	0.067	0.058	0.141	0.137	0.156	0.151	0.16	0.166	0.09	0.068	0.079			P78042 vs. AMS3743_1	-0.001381	-0.002056 to -0.0007063	Yes	***
16:14:15	0.063	0.069	0.06	0.144	0.14	0.159	0.155	0.164	0.17	0.092	0.07	0.08			P78042 vs. AMS3743_6	-0.0004265	-0.001102 to 0.0002486	No	ns
16:29:16	0.064	0.071	0.062	0.147	0.143	0.162	0.158	0.167	0.173	0.094	0.072	0.082			AMS3743 vs. AMS3743_1	-0.0002425	-0.0009176 to 0.0004325	No	ns
16:44:16	0.066	0.072	0.064	0.15	0.145	0.165	0.161	0.17	0.176	0.096	0.074	0.084			AMS3743 vs. AMS3743_6	0.0007123	3.726e-005 to 0.001387	Yes	*
16:59:16	0.068	0.074	0.066	0.153	0.148	0.167	0.164	0.171	0.179	0.097	0.076	0.085			AMS3743_1 vs. AMS3743_6	0.0009549	0.0002798 to 0.001630	Yes	**
17:14:16	0.069	0.075	0.068	0.156	0.151	0.17	0.167	0.173	0.182	0.099	0.078	0.087
17:29:16	0.071	0.076	0.069	0.159	0.154	0.173	0.17	0.176	0.185	0.1	0.079	0.088
17:44:16	0.072	0.078	0.071	0.162	0.156	0.175	0.173	0.179	0.187	0.102	0.081	0.089			Test details	Mean 1	Mean 2	Mean Diff.	SE of diff.	n1	n2	q	DF
17:59:16	0.074	0.079	0.072	0.165	0.159	0.178	0.177	0.182	0.19	0.103	0.083	0.091
18:14:16	0.075	0.08	0.074	0.168	0.161	0.18	0.179	0.185	0.193	0.104	0.084	0.092			P78042 vs. AMS3743	0.001914	0.003052	-0.001139	0.0002108	3	3	7.64	8
18:29:16	0.076	0.081	0.075	0.171	0.164	0.183	0.182	0.189	0.195	0.106	0.085	0.093			P78042 vs. AMS3743_1	0.001914	0.003295	-0.001381	0.0002108	3	3	9.267	8
18:44:16	0.078	0.082	0.076	0.175	0.166	0.185	0.185	0.192	0.198	0.107	0.087	0.094			P78042 vs. AMS3743_6	0.001914	0.00234	-0.0004265	0.0002108	3	3	2.861	8
18:59:16	0.079	0.083	0.078	0.177	0.168	0.188	0.188	0.196	0.2	0.108	0.088	0.095			AMS3743 vs. AMS3743_1	0.003052	0.003295	-0.0002425	0.0002108	3	3	1.627	8
19:14:16	0.08	0.084	0.079	0.18	0.171	0.191	0.19	0.196	0.203	0.109	0.089	0.096			AMS3743 vs. AMS3743_6	0.003052	0.00234	0.0007123	0.0002108	3	3	4.779	8
19:29:16	0.081	0.085	0.08	0.183	0.173	0.193	0.193	0.199	0.205	0.11	0.09	0.098			AMS3743_1 vs. AMS3743_6	0.003295	0.00234	0.0009549	0.0002108	3	3	6.406	8
19:44:16	0.082	0.086	0.081	0.186	0.176	0.196	0.196	0.199	0.208	0.112	0.092	0.099
19:59:16	0.083	0.087	0.082	0.189	0.178	0.199	0.2	0.202	0.211	0.113	0.093	0.1
20:14:16	0.084	0.088	0.083	0.192	0.181	0.201	0.202	0.204	0.213	0.114	0.094	0.101
20:29:16	0.085	0.089	0.084	0.194	0.183	0.203	0.205	0.206	0.216	0.115	0.095	0.102
20:44:16	0.086	0.09	0.085	0.197	0.186	0.206	0.208	0.209	0.218	0.116	0.096	0.103
20:59:16	0.087	0.091	0.086	0.2	0.188	0.208	0.211	0.211	0.221	0.117	0.097	0.104
21:14:16	0.088	0.092	0.087	0.203	0.191	0.211	0.211	0.214	0.224	0.118	0.098	0.105
21:29:16	0.089	0.093	0.088	0.206	0.192	0.213	0.214	0.216	0.223	0.119	0.099	0.106
21:44:16	0.091	0.094	0.09	0.208	0.195	0.216	0.217	0.219	0.226	0.121	0.1	0.107
21:59:16	0.092	0.095	0.091	0.211	0.195	0.219	0.221	0.221	0.229	0.122	0.101	0.109
22:14:16	0.093	0.096	0.092	0.213	0.197	0.221	0.224	0.224	0.231	0.123	0.102	0.109
22:29:16	0.094	0.097	0.093	0.216	0.2	0.224	0.227	0.226	0.234	0.125	0.104	0.111
22:44:16	0.095	0.098	0.095	0.218	0.203	0.227	0.23	0.229	0.237	0.126	0.105	0.112
22:59:16	0.096	0.099	0.096	0.221	0.205	0.23	0.233	0.232	0.24	0.128	0.105	0.113
23:14:16	0.098	0.099	0.097	0.224	0.208	0.232	0.236	0.234	0.243	0.129	0.107	0.115
23:29:16	0.099	0.1	0.098	0.226	0.211	0.235	0.239	0.236	0.245	0.131	0.108	0.117
23:44:16	0.1	0.101	0.1	0.229	0.214	0.239	0.243	0.239	0.249	0.133	0.109	0.118
23:59:16	0.101	0.103	0.101	0.232	0.216	0.242	0.246	0.242	0.251	0.134	0.11	0.12
Max Slope	0.00191778	0.00190909	0.00191377	0.00290307	0.00298295	0.00327106	0.00304278	0.00306618	0.00377574	0.0025488	0.00208422	0.00238703
