# Supplementary material for: Genome plasticity in Candida albicans is driven by long repeat sequences
Source: eLife journal article supplement (doi:10.7554/elife.45954), 2019-06-07
Supplement: supp [file elife-45954-supp-v1.zip › elife_poa_e45954_Figure_2_source_data_1.xlsx]

## Sheet: Figure 2A
These data were used to determine if the GC content and the ORF density of each chromsome arm correlated with an increased density of long repeat sequences.
These data were generated using the SC5314 Reference Genome v 21 .fasta and .gff files (See Methods)
		A	T	G	C	Ambiguous (N)	Total (bp)	%GC	ORFs	ORF/bp		Average Genome %GC		Null Hypothesis: There is no significant correlation between the percent GC content of a chromosome arm and the number of long repeat sequences on that chromosome arm.
	Chr1	1061464	1065054	531001	530465	403	3188387	33.2916	1393	0.000436898		33.4641		Best-fit values
	Chr1L	519271	522202	259463	261726	287	1562949	33.3465	692	0.000442753				Slope	-9.718 ± 9.625
	Chr1R	541212	541914	271069	268197	116	1622508	33.2366	701	0.000432047				Y-intercept when X=0.0	430.1 ± 327.2
														X-intercept when Y=0.0	44.26
	ChrR	759321	754542	386589	385225	279	2285956	33.7633	994	0.000434829				1/slope	-0.1029
	ChrRL	581578	579243	290661	291236	48	1742766	33.3893	739	0.000424039				95% Confidence Intervals
	ChrRR	176288	173923	95174	93099	231	538715	34.9485	255	0.000473349				Slope	-30.36 to 10.93
														Y-intercept when X=0.0	-271.8 to 1132
	Chr2	743795	740296	373628	373448	452	2231619	33.4769	1020	0.000457067				X-intercept when Y=0.0	36.93 to +infinity
	Chr2L	642011	639917	322669	321841	447	1926885	33.4483	890	0.000461885				Goodness of Fit
	Chr2R	100884	99374	50307	51204	5	301774	33.6381	130	0.000430786				R square	0.06787
														Sy.x	67.4
	Chr3	599511	597633	299763	301909	462	1799278	33.4396	759	0.000421836				Is slope significantly non-zero?
	Chr3L	273537	273879	135959	139467	379	823221	33.4571	378	0.000459172				F	1.019
	Chr3R	324958	322713	163190	161965	83	972909	33.4209	381	0.000391609				DFn, DFd	1.000, 14.00
														P value	0.3298
	Chr4	535684	531807	268146	267064	593	1603294	33.3819	674	0.000420385				Deviation from zero?	Not Significant
	Chr4L	332534	330504	163503	165528	383	992452	33.1533	428	0.000431255				Data
	Chr4R	202008	200079	103952	100955	210	607204	33.746	246	0.000405136				Number of X values	16
														Maximum number of Y replicates	1
	Chr5	394861	399283	196888	199766	106	1190904	33.307	534	0.000448399				Total number of values	16
	Chr5L	154069	157516	76628	80493	0	468706	33.5223	207	0.000441641				Number of missing values	0
	Chr5R	239824	240719	119729	118790	106	719168	33.166	327	0.000454692
														Equation	Y = -9.718*X + 430.1
	Chr6	343483	343314	173146	173487	100	1033530	33.5387	441	0.000426693
	Chr6L	327688	327210	162202	162939	0	980039	33.1763	418	0.000426514				Null Hypothesis: There is no significant correlation between that ORF density of a chromosome arm and the number of long repeat sequences on that chromosome arm.
	Chr6R	14522	14949	10293	9874	100	49738	40.5465	23	0.000462423				Best-fit values
														Slope	0.04732 ± 0.08597
	Chr7	314623	316742	159622	158629	0	949616	33.5137	408	0.000429647				Y-intercept when X=0.0	432.9 ± 10.28
	Chr7L	140286	142892	71122	71511	0	425811	33.4968	189	0.000443859				X-intercept when Y=0.0	-9148
	Chr7R	173330	172965	88070	86539	0	520904	33.5204	219	0.000420423				1/slope	21.13
														95% Confidence Intervals
														Slope	-0.1371 to 0.2317
														Y-intercept when X=0.0	410.8 to 454.9
														X-intercept when Y=0.0	#NAME?
														Goodness of Fit
														R square	0.02118
														Sy.x	22.45
														Is slope significantly non-zero?
														F	0.303
														DFn, DFd	1.000, 14.00
														P value	0.5907
														Deviation from zero?	Not Significant
														Data
														Number of X values	16
														Maximum number of Y replicates	1
														Total number of values	16
														Number of missing values	0
														Equation	Y = 0.04732*X + 432.9

## Sheet: Figure 2B
These data indicate the correlation between chromosome size (bp) and number of matched repeats found on each chromosome.
These values were used to generate the linear regression in Figure 2B.
Chromosome	Repeat Matches	Chromosome size (bp)			Null Hypothesis: There is no significant correlation between chromsome size and the number of repeat matches on that chromsome.
1	294	3188341
2	299	2231883			Best-fit values
3	167	1799298			Slope	0.0001101 ± 3.311e-005
4	172	1603259			Y-intercept when X=0.0	12.05 ± 63.66
5	108	1190869			X-intercept when Y=0.0	-109394
6	92	1033292			1/slope	9082
7	153	949580			95% Confidence Intervals
R	384	2286237			Slope	2.908e-005 to 0.0001911
					Y-intercept when X=0.0	-143.7 to 167.8
					X-intercept when Y=0.0	-5.485e+006 to 791044
					Goodness of Fit
					R square	0.6483
					Sy.x	66.8
					Is slope significantly non-zero?
					F	11.06
					DFn: 1	DFd: 6
					P value	0.0159
					Deviation from zero?	Significant
					Data
					Number of X values	8
					Maximum number of Y replicates	1
					Total number of values	8
					Number of missing values	16
					Equation	Y = 0.0001101*X + 12.05

## Sheet: Figure 2C
These data indicate the abundance of repeat matches of each genomic feature type and how they match to sequences on different chormosomes (Inter-Chr) or within the same chromosome (Intra-Chr).
These data were used to generate Figure 2C.
Feature	Inter Chr	Intra Chr
Intergenic	69	46
LTR	665	110
ORF	123	216
Retrotransposon	24	16
tRNA	234	100

## Sheet: Genome coverage of long repeats
These data were used to determine the coverage of the long repeat sequences (excluding the complex tandem repeat genes) across the genome.
These data were derived from Supplementary File 2.
	Repeat Family Number	Average Copy Length	Copies Per Genome	Total Repeat Coverage		Total Repeat Coverage (Sum bp)	409130
	1	82.5833	4	330.333		Haploid Genome Size (bp)	14280189
	3	1850	2	3700		Fraction of genome covered by long repeats	0.0286501
	4	106.5	4	426		Percent of genome covered by long repeats	2.86501
	5	87.6333	6	525.8
	6	391.061	10	3910.61
	7	211.319	8	1690.55
	8	170	2	340
	9	315.667	3	947
	10	199.625	6	1197.75
	11	2	2	4
	12	94.55	7	661.85
	13	348.533	6	2091.2
	14	1639	2	3278
	15	120	2	240
	16	453	2	906
	17	144.9	5	724.5
	18	95.9333	3	287.8
	19	115.5	3	346.5
	20	129.1	5	645.5
	21	257	2	514
	22	1649.5	2	3299
	23	368.167	3	1104.5
	24	1025	2	2050
	25	343	2	686
	26	393	2	786
	27	331	2	662
	28	422	3	1266
	29	1236.33	3	3709
	30	626.5	2	1253
	31	400	2	800
	32	1161	2	2322
	33	248.111	10	2481.11
	34	192.5	2	385
	35	285.775	7	2000.42
	36	601	2	1202
	37	401.152	13	5214.98
	38	173.167	3	519.5
	39	267.864	12	3214.36
	40	270.6	4	1082.4
	41	701.667	3	2105
	42	360.25	9	3242.25
	43	400.344	14	5604.82
	44	212	2	424
	45	206	2	412
	46	140	2	280
	47	1121	2	2242
	48	808	2	1616
	49	199	3	597
	50	210.969	7	1476.78
	51	1029	2	2058
	52	1399	2	2798
	53	507.333	3	1522
	54	173	3	519
	55	337	2	674
	56	409	2	818
	57	809	2	1618
	58	2860.5	2	5721
	59	199	2	398
	60	765	2	1530
	61	290	2	580
	62	1183.5	2	2367
	63	113	2	226
	64	863	2	1726
	65	1327	2	2654
	66	394	2	788
	67	139.857	6	839.143
	68	1571	2	3142
	69	237.053	5	1185.26
	70	1111.5	2	2223
	71	200	2	400
	72	309.222	5	1546.11
	73	1210.67	5	6053.33
	74	1526	2	3052
	75	133	8	1064
	76	232.625	5	1163.12
	77	280	2	560
	78	184.5	2	369
	79	1043	3	3129
	80	316.5	2	633
	81	321.5	2	643
	82	375	2	750
	83	82.7273	5	413.636
	84	247.5	2	495
	85	892.5	2	1785
	86	4054.5	2	8109
	87	1231.5	2	2463
	88	1179	2	2358
	89	72	2	144
	90	300.133	6	1800.8
	91	101.375	5	506.875
	92	561.25	4	2245
	93	281	4	1124
	94	666.5	2	1333
	95	90.1667	6	541
	96	92.2857	6	553.714
	97	94.25	4	377
	98	104.1	5	520.5
	100	78	2	156
	101	290	2	580
	102	351.333	3	1054
	103	329.625	4	1318.5
	104	73	2	146
	105	1332.5	2	2665
	106	333	6	1998
	107	1105	2	2210
	109	229	2	458
	110	227	2	454
	111	389	2	778
	112	480	2	960
	114	723	2	1446
	115	837.5	2	1675
	116	1142.33	3	3427
	117	211	2	422
	118	120	2	240
	120	93.75	4	375
	121	159	2	318
	122	635	2	1270
	123	106.595	7	746.167
	124	3214	2	6428
	126	1764	2	3528
	127	4113.5	2	8227
	128	99	2	198
	129	1274	2	2548
	130	1746	2	3492
	131	903	3	2709
	132	1288	2	2576
	133	1934	2	3868
	134	1284.5	2	2569
	135	537	2	1074
	136	2407	3	7221
	138	116	2	232
	139	221	2	442
	140	933.5	2	1867
	141	531.667	3	1595
	142	202.333	4	809.333
	143	386	2	772
	144	1745.5	2	3491
	145	79.5	2	159
	145	79.5	2	159
	146	2575	2	5150
	147	85.5	2	171
	148	1526	2	3052
	149	298.5	2	597
	150	1298	2	2596
	151	524	2	1048
	152	1830	2	3660
	153	1851.67	2	3703.33
	154	505	2	1010
	155	1385	2	2770
	156	145.333	3	436
	157	79	2	158
	158	271	2	542
	159	235	2	470
	160	112	2	224
	161	2203.5	2	4407
	162	616	2	1232
	163	344.5	2	689
	164	1068.5	2	2137
	165	208	2	416
	166	320.5	2	641
	167	602	2	1204
	168	866	2	1732
	169	949	2	1898
	170	230	2	460
	171	1492	2	2984
	172	1273.5	2	2547
	173	1259.5	2	2519
	174	554.75	3	1664.25
	174	492.5	3	1477.5
	175	152.5	2	305
	176	208	2	416
	177	6486.5	2	12973
	178	2429.25	3	7287.75
	179	3794	3	11382
	180	141	2	282
	183	1297	2	2594
	185	639.5	2	1279
	186	1292.5	2	2585
	187	827.5	2	1655
	188	1634.33	2	3268.67
	189	786	2	1572
	190	835.5	2	1671
	191	781	2	1562
	192	173	2	346
	193	281	2	562
	194	1444	2	2888
	195	234.5	2	469
	196	205	2	410
	197	294	2	588
	198	1347	2	2694
	199	533.5	2	1067
	200	382.5	2	765
	201	1378	2	2756
	202	2672	3	8016
	203	745	2	1490
	204	511	2	1022
	205	191	2	382
	206	2030	2	4060
	207	778.5	2	1557
	208	3983	2	7966
	209	2732.5	2	5465
	210	3708	2	7416
	211	130	2	260
	212	1709	2	3418
	213	95	2	190
	214	91	2	182
	215	1873.5	2	3747
	217	4754	2	9508
	218	3254	2	6508
	219	816.5	2	1633
	220	139	2	278
	221	165	2	330
	222	199	2	398
	223	294	2	588
	224	75	2	150
	225	380.5	2	761
	226	154.5	2	309
	227	126	2	252
	228	92.5	2	185
	229	88	2	176
	230	187.5	2	375
	231	71	2	142
	232	86.5	2	173
	233	118	2	236
