# Supplementary material for: Genome plasticity in Candida albicans is driven by long repeat sequences
Source: eLife journal article supplement (doi:10.7554/elife.45954), 2019-06-07
Supplement: supp [file elife-45954-supp-v1.zip › elife_poa_e45954_Figure_2_source_data_2.xlsx]

## Sheet: Figure 2-figure supplement 2A&B
These data were used to generate Figure 2-figure supplement 2A&B
These data are derived from Supplementary File 2
* p<0.05, **p<0.01, ***p<0.001, ****p<0.0001
Chromosome	Spacer Length	Identity	Copy Length	Feature	LOH	CNV	Inversion	Break		Null Hypothesis: There is no significant correlation between repeat match spacer length and chromsome size.
1	1618616	89.64	248	LTR	LOH	CNV	Non-Inversion	Break		Statistical Analysis Figure 2 - Supplement 2A:
1	741247	97.64	127	tRNA	LOH	Non-CNV	Non-Inversion	Break		Residual standard error: 571500 on 486 degrees of freedom
1	81687	97.64	1651	ORF	LOH	Non-CNV	Non-Inversion	Break		Multiple R-squared: 0.06749,
1	17217	99.02	1121	ORF	LOH	Non-CNV	Non-Inversion	Break		F-statistic: 35.17 on 1 and 486 DF
1	6797	93.78	1320	ORF	Non-LOH	CNV	INVERSION	Break		p-value: 5.734e-09
1	26107	91.46	1639	ORF	Non-LOH	CNV	Non-Inversion	Break		Adjusted R-squared: 0.06557
1	29383	91.46	1639	ORF	Non-LOH	CNV	Non-Inversion	Break
1	58563	96.47	2861	ORF	Non-LOH	Non-CNV	INVERSION	Break		Null Hypothesis: There is no significant difference in the distribution of repeat match spacer lengths between the different chromosomes.
1	1126717	100	83	tRNA	Non-LOH	Non-CNV	Non-Inversion	Non-Break		Kruskal-Wallis test: Figure 2 - Supplement 2B:
1	494106	92.41	385	LTR	Non-LOH	Non-CNV	Non-Inversion	Non-Break		Kruskal-Wallis test
1	3211	99.74	386	LTR	Non-LOH	Non-CNV	Non-Inversion	Non-Break		P value	0.0317
1	490510	92.66	385	LTR	Non-LOH	Non-CNV	Non-Inversion	Non-Break		Exact or approximate P value?	Approximate
1	3981	99.74	386	LTR	Non-LOH	Non-CNV	Non-Inversion	Non-Break		P value summary	*
1	989479	95.24	104	tRNA	Non-LOH	Non-CNV	Non-Inversion	Non-Break		Do the medians vary signif. (P < 0.05)	Yes
1	2856022	96.91	95	tRNA	Non-LOH	Non-CNV	Non-Inversion	Non-Break		Number of groups	8
1	149148	97.67	84	tRNA	Non-LOH	Non-CNV	Non-Inversion	Non-Break		Kruskal-Wallis statistic	15.36
1	140950	94.13	374	LTR	Non-LOH	Non-CNV	Non-Inversion	Non-Break
1	1434916	85.31	159	LTR	Non-LOH	Non-CNV	Non-Inversion	Non-Break		Data summary
1	2267964	95.16	247	LTR	Non-LOH	Non-CNV	Non-Inversion	Non-Break		Number of treatments (columns)	8
1	2521161	92.35	170	ORF	Non-LOH	Non-CNV	Non-Inversion	Non-Break		Number of values (total)	488
1	149316	97.67	86	tRNA	Non-LOH	Non-CNV	Non-Inversion	Non-Break
1	2706800	98.86	88	tRNA	Non-LOH	Non-CNV	Non-Inversion	Non-Break		Number of families	1
1	141697	94.13	375	LTR	Non-LOH	Non-CNV	Non-Inversion	Non-Break		Number of comparisons per family	28
1	16398	92.5	120	ORF	Non-LOH	Non-CNV	Non-Inversion	Non-Break		Alpha	0.05
1	16636	92.5	120	ORF	Non-LOH	Non-CNV	Non-Inversion	Non-Break
1	494882	92.41	393	LTR	Non-LOH	Non-CNV	Non-Inversion	Non-Break		Dunn's multiple comparisons test	Mean rank diff.	Significant?	Summary
1	490902	92.66	393	LTR	Non-LOH	Non-CNV	Non-Inversion	Non-Break
1	448846	86.67	115	tRNA	Non-LOH	Non-CNV	Non-Inversion	Non-Break		Chr1 vs. Chr2	40.23	No	ns
1	448654	84.87	115	tRNA	Non-LOH	Non-CNV	Non-Inversion	Non-Break		Chr1 vs. Chr3	-4.624	No	ns
1	625387	92.61	257	ORF	Non-LOH	Non-CNV	Non-Inversion	Non-Break		Chr1 vs. Chr4	46.74	No	ns
1	78390	97.64	1648	ORF	Non-LOH	Non-CNV	Non-Inversion	Non-Break		Chr1 vs. Chr5	105.7	No	ns
1	23569	82.59	1025	ORF	Non-LOH	Non-CNV	Non-Inversion	Non-Break		Chr1 vs. Chr6	56	No	ns
1	25617	82.59	1025	ORF	Non-LOH	Non-CNV	Non-Inversion	Non-Break		Chr1 vs. Chr7	39.31	No	ns
1	2063357	89.78	1658	ORF	Non-LOH	Non-CNV	Non-Inversion	Non-Break		Chr1 vs. ChrR	25.42	No	ns
1	61	82.99	194	ORF	Non-LOH	Non-CNV	Non-Inversion	Non-Break		Chr2 vs. Chr3	-44.85	No	ns
1	322	82.99	191	ORF	Non-LOH	Non-CNV	Non-Inversion	Non-Break		Chr2 vs. Chr4	6.507	No	ns
1	2132356	97.5	280	LTR	Non-LOH	Non-CNV	Non-Inversion	Non-Break		Chr2 vs. Chr5	65.51	No	ns
1	989686	95.24	105	tRNA	Non-LOH	Non-CNV	Non-Inversion	Non-Break		Chr2 vs. Chr6	15.77	No	ns
1	77	82.05	116	tRNA	Non-LOH	Non-CNV	Non-Inversion	Non-Break		Chr2 vs. Chr7	-0.9191	No	ns
1	448884	84.87	117	tRNA	Non-LOH	Non-CNV	Non-Inversion	Non-Break		Chr2 vs. ChrR	-14.81	No	ns
1	449075	86.67	116	tRNA	Non-LOH	Non-CNV	Non-Inversion	Non-Break		Chr3 vs. Chr4	51.36	No	ns
1	305	82.05	114	tRNA	Non-LOH	Non-CNV	Non-Inversion	Non-Break		Chr3 vs. Chr5	110.4	No	ns
1	1126881	100	83	tRNA	Non-LOH	Non-CNV	Non-Inversion	Non-Break		Chr3 vs. Chr6	60.62	No	ns
1	5529	84.41	601	ORF	Non-LOH	Non-CNV	Non-Inversion	Non-Break		Chr3 vs. Chr7	43.93	No	ns
1	6729	84.41	601	ORF	Non-LOH	Non-CNV	Non-Inversion	Non-Break		Chr3 vs. ChrR	30.04	No	ns
1	1299191	94.38	409	LTR	Non-LOH	Non-CNV	Non-Inversion	Non-Break		Chr4 vs. Chr5	59	No	ns
1	643296	90.04	278	LTR	Non-LOH	Non-CNV	Non-Inversion	Non-Break		Chr4 vs. Chr6	9.26	No	ns
1	1894530	93.23	263	LTR	Non-LOH	Non-CNV	Non-Inversion	Non-Break		Chr4 vs. Chr7	-7.426	No	ns
1	1618120	89.64	250	LTR	Non-LOH	Non-CNV	Non-Inversion	Non-Break		Chr4 vs. ChrR	-21.32	No	ns
1	625899	92.61	257	ORF	Non-LOH	Non-CNV	Non-Inversion	Non-Break		Chr5 vs. Chr6	-49.74	No	ns
1	741499	97.64	127	tRNA	Non-LOH	Non-CNV	Non-Inversion	Non-Break		Chr5 vs. Chr7	-66.43	No	ns
1	14977	99.02	1121	ORF	Non-LOH	Non-CNV	Non-Inversion	Non-Break		Chr5 vs. ChrR	-80.32	No	ns
1	1435250	85.31	177	LTR	Non-LOH	Non-CNV	Non-Inversion	Non-Break		Chr6 vs. Chr7	-16.69	No	ns
1	643850	90.04	278	LTR	Non-LOH	Non-CNV	Non-Inversion	Non-Break		Chr6 vs. ChrR	-30.58	No	ns
1	55917	83.14	337	ORF	Non-LOH	Non-CNV	Non-Inversion	Non-Break		Chr7 vs. ChrR	-13.89	No	ns
1	51078	81.51	409	ORF	Non-LOH	Non-CNV	Non-Inversion	Non-Break
1	48904	88.4	809	ORF	Non-LOH	Non-CNV	Non-Inversion	Non-Break
1	56589	83.14	337	ORF	Non-LOH	Non-CNV	Non-Inversion	Non-Break		Test details	Mean rank 1	Mean rank 2	Mean rank diff.	n1	n2
1	51894	81.51	409	ORF	Non-LOH	Non-CNV	Non-Inversion	Non-Break
1	50520	88.4	809	ORF	Non-LOH	Non-CNV	Non-Inversion	Non-Break		Chr1 vs. Chr2	274.1	233.9	40.23	82	64
1	64282	96.47	2860	ORF	Non-LOH	Non-CNV	Non-Inversion	Non-Break		Chr1 vs. Chr3	274.1	278.7	-4.624	82	44
1	302	92.41	290	ORF	Non-LOH	Non-CNV	Non-Inversion	Non-Break		Chr1 vs. Chr4	274.1	227.4	46.74	82	53
1	880	92.41	290	ORF	Non-LOH	Non-CNV	Non-Inversion	Non-Break		Chr1 vs. Chr5	274.1	168.4	105.7	82	22
1	2268457	95.16	248	LTR	Non-LOH	Non-CNV	Non-Inversion	Non-Break		Chr1 vs. Chr6	274.1	218.1	56	82	37
1	1300005	94.38	407	LTR	Non-LOH	Non-CNV	Non-Inversion	Non-Break		Chr1 vs. Chr7	274.1	234.8	39.31	82	34
1	2521499	92.35	170	ORF	Non-LOH	Non-CNV	Non-Inversion	Non-Break		Chr1 vs. ChrR	274.1	248.7	25.42	82	152
1	7005	84.51	863	ORF	Non-LOH	Non-CNV	Non-Inversion	Non-Break		Chr2 vs. Chr3	233.9	278.7	-44.85	64	44
1	4145	93.78	1334	ORF	Non-LOH	Non-CNV	Non-Inversion	Non-Break		Chr2 vs. Chr4	233.9	227.4	6.507	64	53
1	8729	84.51	863	ORF	Non-LOH	Non-CNV	Non-Inversion	Non-Break		Chr2 vs. Chr5	233.9	168.4	65.51	64	22
1	2066675	89.78	1662	ORF	Non-LOH	Non-CNV	Non-Inversion	Non-Break		Chr2 vs. Chr6	233.9	218.1	15.77	64	37
1	47903	80.47	1571	ORF	Non-LOH	Non-CNV	Non-Inversion	Non-Break		Chr2 vs. Chr7	233.9	234.8	-0.9191	64	34
1	2856212	96.91	97	tRNA	Non-LOH	Non-CNV	Non-Inversion	Non-Break		Chr2 vs. ChrR	233.9	248.7	-14.81	64	152
1	2706973	98.86	87	tRNA	Non-LOH	Non-CNV	Non-Inversion	Non-Break		Chr3 vs. Chr4	278.7	227.4	51.36	44	53
1	51043	80.47	1571	ORF	Non-LOH	Non-CNV	Non-Inversion	Non-Break		Chr3 vs. Chr5	278.7	168.4	110.4	44	22
1	18170	84.04	1110	ORF	Non-LOH	Non-CNV	Non-Inversion	Non-Break		Chr3 vs. Chr6	278.7	218.1	60.62	44	37
1	20391	84.04	1113	ORF	Non-LOH	Non-CNV	Non-Inversion	Non-Break		Chr3 vs. Chr7	278.7	234.8	43.93	44	34
1	5	98	200	ORF	Non-LOH	Non-CNV	Non-Inversion	Non-Break		Chr3 vs. ChrR	278.7	248.7	30.04	44	152
1	403	98	200	ORF	Non-LOH	Non-CNV	Non-Inversion	Non-Break		Chr4 vs. Chr5	227.4	168.4	59	53	22
1	1895053	93.23	262	LTR	Non-LOH	Non-CNV	Non-Inversion	Non-Break		Chr4 vs. Chr6	227.4	218.1	9.26	53	37
1	72	95.79	284	LTR	Non-LOH	Non-CNV	Non-Inversion	Non-Break		Chr4 vs. Chr7	227.4	234.8	-7.426	53	34
1	2132914	97.5	280	LTR	Non-LOH	Non-CNV	Non-Inversion	Non-Break		Chr4 vs. ChrR	227.4	248.7	-21.32	53	152
1	639	95.79	285	LTR	Non-LOH	Non-CNV	Non-Inversion	Non-Break		Chr5 vs. Chr6	168.4	218.1	-49.74	22	37
2	49490	96.19	4122	ORF	LOH	Non-CNV	INVERSION	Break		Chr5 vs. Chr7	168.4	234.8	-66.43	22	34
2	14051	89.17	1230	ORF	LOH	Non-CNV	Non-Inversion	Break		Chr5 vs. ChrR	168.4	248.7	-80.32	22	152
2	20326	99.44	177	tRNA	LOH	Non-CNV	Non-Inversion	Break		Chr6 vs. Chr7	218.1	234.8	-16.69	37	34
2	61020	83.98	666	ORF	Non-LOH	CNV	Non-Inversion	Break		Chr6 vs. ChrR	218.1	248.7	-30.58	37	152
2	506943	96.54	231	LTR	Non-LOH	Non-CNV	Non-Inversion	Non-Break		Chr7 vs. ChrR	234.8	248.7	-13.89	34	152
2	864414	96.12	232	LTR	Non-LOH	Non-CNV	Non-Inversion	Non-Break
2	4272	89.2	1491	ORF	Non-LOH	Non-CNV	Non-Inversion	Non-Break
2	1311	88.34	1526	ORF	Non-LOH	Non-CNV	Non-Inversion	Non-Break
2	4361	88.34	1526	ORF	Non-LOH	Non-CNV	Non-Inversion	Non-Break
2	1465	90.22	1462	ORF	Non-LOH	Non-CNV	Non-Inversion	Non-Break
2	7252	89.2	1491	ORF	Non-LOH	Non-CNV	Non-Inversion	Non-Break
2	4387	90.22	1462	ORF	Non-LOH	Non-CNV	Non-Inversion	Non-Break
2	147301	89.89	176	tRNA	Non-LOH	Non-CNV	Non-Inversion	Non-Break
2	686574	92.79	208	LTR	Non-LOH	Non-CNV	Non-Inversion	Non-Break
2	1085202	96.6	202	LTR	Non-LOH	Non-CNV	Non-Inversion	Non-Break
2	147652	89.89	177	tRNA	Non-LOH	Non-CNV	Non-Inversion	Non-Break
2	101	87.63	186	ORF	Non-LOH	Non-CNV	Non-Inversion	Non-Break
2	266	87.63	183	ORF	Non-LOH	Non-CNV	Non-Inversion	Non-Break
2	359377	83.71	1403	ORF	Non-LOH	Non-CNV	Non-Inversion	Non-Break
2	362557	83.5	818	ORF	Non-LOH	Non-CNV	Non-Inversion	Non-Break
2	62496	88.89	320	ORF	Non-LOH	Non-CNV	Non-Inversion	Non-Break
2	63137	88.89	323	ORF	Non-LOH	Non-CNV	Non-Inversion	Non-Break
2	87573	98.43	893	ORF	Non-LOH	Non-CNV	Non-Inversion	Non-Break
2	11590	89.17	1233	ORF	Non-LOH	Non-CNV	Non-Inversion	Non-Break
2	57597	96.19	3987	ORF	Non-LOH	Non-CNV	Non-Inversion	Non-Break
2	89356	98.43	892	ORF	Non-LOH	Non-CNV	Non-Inversion	Non-Break
2	357002	99.15	471	LTR	Non-LOH	Non-CNV	Non-Inversion	Non-Break
2	507403	96.54	231	LTR	Non-LOH	Non-CNV	Non-Inversion	Non-Break
2	362181	83.71	1403	ORF	Non-LOH	Non-CNV	Non-Inversion	Non-Break
2	2243	90.31	908	ORF	Non-LOH	Non-CNV	Non-Inversion	Non-Break
2	364191	83.5	818	ORF	Non-LOH	Non-CNV	Non-Inversion	Non-Break
2	4057	90.31	908	ORF	Non-LOH	Non-CNV	Non-Inversion	Non-Break
2	19974	99.44	177	tRNA	Non-LOH	Non-CNV	Non-Inversion	Non-Break
2	1378068	98.06	103	tRNA	Non-LOH	Non-CNV	Non-Inversion	Non-Break
2	1357920	97.03	101	tRNA	Non-LOH	Non-CNV	Non-Inversion	Non-Break
2	686987	92.79	207	LTR	Non-LOH	Non-CNV	Non-Inversion	Non-Break
2	411353	86.42	853	ORF	Non-LOH	Non-CNV	Non-Inversion	Non-Break
2	2569	88.55	427	ORF	Non-LOH	Non-CNV	Non-Inversion	Non-Break
2	3421	88.55	427	ORF	Non-LOH	Non-CNV	Non-Inversion	Non-Break
2	62351	83.98	667	ORF	Non-LOH	Non-CNV	Non-Inversion	Non-Break
2	357942	99.15	471	LTR	Non-LOH	Non-CNV	Non-Inversion	Non-Break
2	864876	96.12	232	LTR	Non-LOH	Non-CNV	Non-Inversion	Non-Break
2	209138	98.02	101	tRNA	Non-LOH	Non-CNV	Non-Inversion	Non-Break
2	507940	95.88	96	tRNA	Non-LOH	Non-CNV	Non-Inversion	Non-Break
2	1085608	96.6	206	LTR	Non-LOH	Non-CNV	Non-Inversion	Non-Break
2	209338	98.02	101	tRNA	Non-LOH	Non-CNV	Non-Inversion	Non-Break
2	298701	97.94	96	tRNA	Non-LOH	Non-CNV	Non-Inversion	Non-Break
2	413066	86.42	862	ORF	Non-LOH	Non-CNV	Non-Inversion	Non-Break
2	508131	95.88	97	tRNA	Non-LOH	Non-CNV	Non-Inversion	Non-Break
2	298892	97.94	97	tRNA	Non-LOH	Non-CNV	Non-Inversion	Non-Break
2	3924	99.36	313	Retrotransposon	Non-LOH	Non-CNV	Non-Inversion	Non-Break
2	4548	99.36	313	Retrotransposon	Non-LOH	Non-CNV	Non-Inversion	Non-Break
2	492	86.09	229	ORF	Non-LOH	Non-CNV	Non-Inversion	Non-Break
2	1	89.43	227	ORF	Non-LOH	Non-CNV	Non-Inversion	Non-Break
2	451	89.43	227	ORF	Non-LOH	Non-CNV	Non-Inversion	Non-Break
2	948	86.09	229	ORF	Non-LOH	Non-CNV	Non-Inversion	Non-Break
2	86743	87.53	385	Intergenic	Non-LOH	Non-CNV	Non-Inversion	Non-Break
2	87519	87.53	393	Intergenic	Non-LOH	Non-CNV	Non-Inversion	Non-Break
2	50639	97.79	723	ORF	Non-LOH	Non-CNV	Non-Inversion	Non-Break
2	52083	97.79	723	ORF	Non-LOH	Non-CNV	Non-Inversion	Non-Break
2	37101	88.05	842	ORF	Non-LOH	Non-CNV	Non-Inversion	Non-Break
2	38774	88.05	833	ORF	Non-LOH	Non-CNV	Non-Inversion	Non-Break
2	1358120	97.03	101	tRNA	Non-LOH	Non-CNV	Non-Inversion	Non-Break
2	1378271	98.06	102	tRNA	Non-LOH	Non-CNV	Non-Inversion	Non-Break
3	11288	99.53	3215	ORF	LOH	CNV	INVERSION	Break
3	94368	99.13	4113	ORF	LOH	Non-CNV	INVERSION	Break
3	21474	94.91	1746	ORF	LOH	Non-CNV	Non-Inversion	Break
3	102593	99.13	4114	ORF	LOH	Non-CNV	Non-Inversion	Break
3	106922	94.11	1764	ORF	LOH	Non-CNV	Non-Inversion	Break
3	1123931	98.95	190	tRNA	LOH	Non-CNV	Non-Inversion	Break
3	55531	99.83	1782	ORF	Non-LOH	CNV	Non-Inversion	Break
3	507162	89.72	276	LTR	Non-LOH	Non-CNV	Non-Inversion	Non-Break
3	90	84.33	211	ORF	Non-LOH	Non-CNV	Non-Inversion	Non-Break
3	330	84.33	211	ORF	Non-LOH	Non-CNV	Non-Inversion	Non-Break
3	824469	98.8	83	tRNA	Non-LOH	Non-CNV	Non-Inversion	Non-Break
3	1171255	92.59	157	tRNA	Non-LOH	Non-CNV	Non-Inversion	Non-Break
3	388063	89.34	117	tRNA	Non-LOH	Non-CNV	Non-Inversion	Non-Break
3	255464	95.41	107	tRNA	Non-LOH	Non-CNV	Non-Inversion	Non-Break
3	1265793	89.01	278	LTR	Non-LOH	Non-CNV	Non-Inversion	Non-Break
3	507714	89.72	278	LTR	Non-LOH	Non-CNV	Non-Inversion	Non-Break
3	1123553	98.95	190	tRNA	Non-LOH	Non-CNV	Non-Inversion	Non-Break
3	17714	99.53	3213	ORF	Non-LOH	Non-CNV	Non-Inversion	Non-Break
3	103396	94.11	1764	ORF	Non-LOH	Non-CNV	Non-Inversion	Non-Break
3	357699	92.16	101	tRNA	Non-LOH	Non-CNV	Non-Inversion	Non-Break
3	255678	95.41	109	tRNA	Non-LOH	Non-CNV	Non-Inversion	Non-Break
3	132498	92.79	106	tRNA	Non-LOH	Non-CNV	Non-Inversion	Non-Break
3	501504	83.98	1271	ORF	Non-LOH	Non-CNV	Non-Inversion	Non-Break
3	24964	94.91	1746	ORF	Non-LOH	Non-CNV	Non-Inversion	Non-Break
3	388294	89.34	116	tRNA	Non-LOH	Non-CNV	Non-Inversion	Non-Break
3	132710	92.79	108	tRNA	Non-LOH	Non-CNV	Non-Inversion	Non-Break
3	297973	82.5	903	ORF	Non-LOH	Non-CNV	Non-Inversion	Non-Break
3	199809	83.06	903	ORF	Non-LOH	Non-CNV	Non-Inversion	Non-Break
3	357895	92.16	97	tRNA	Non-LOH	Non-CNV	Non-Inversion	Non-Break
3	96877	92.39	1288	ORF	Non-LOH	Non-CNV	Non-Inversion	Non-Break
3	96231	92.41	1934	ORF	Non-LOH	Non-CNV	Non-Inversion	Non-Break
3	201613	83.06	903	ORF	Non-LOH	Non-CNV	Non-Inversion	Non-Break
3	99451	92.39	1288	ORF	Non-LOH	Non-CNV	Non-Inversion	Non-Break
3	100097	92.41	1934	ORF	Non-LOH	Non-CNV	Non-Inversion	Non-Break
3	299777	82.5	903	ORF	Non-LOH	Non-CNV	Non-Inversion	Non-Break
3	824633	98.8	83	tRNA	Non-LOH	Non-CNV	Non-Inversion	Non-Break
3	504050	83.98	1277	ORF	Non-LOH	Non-CNV	Non-Inversion	Non-Break
3	5487	81.57	1274	ORF	Non-LOH	Non-CNV	Non-Inversion	Non-Break
3	8054	81.57	1295	ORF	Non-LOH	Non-CNV	Non-Inversion	Non-Break
3	51969	99.83	1782	ORF	Non-LOH	Non-CNV	Non-Inversion	Non-Break
3	44598	99.7	3030	ORF	Non-LOH	Non-CNV	Non-Inversion	Non-Break
3	50660	99.7	3034	ORF	Non-LOH	Non-CNV	Non-Inversion	Non-Break
3	1171571	92.59	161	tRNA	Non-LOH	Non-CNV	Non-Inversion	Non-Break
3	1266345	89.01	276	LTR	Non-LOH	Non-CNV	Non-Inversion	Non-Break
4	3111	99.81	524	Intergenic	LOH	CNV	INVERSION	Break
4	31806	98.34	1745	ORF	LOH	Non-CNV	INVERSION	Break
4	957544	95.19	367	LTR	LOH	Non-CNV	Non-Inversion	Break
4	37518	99.34	752	ORF	Non-LOH	Non-CNV	INVERSION	Break
4	53034	89.92	386	ORF	Non-LOH	Non-CNV	Non-Inversion	Non-Break
4	53804	89.92	386	ORF	Non-LOH	Non-CNV	Non-Inversion	Non-Break
4	35295	98.34	1746	ORF	Non-LOH	Non-CNV	Non-Inversion	Non-Break
4	616124	100	82	tRNA	Non-LOH	Non-CNV	Non-Inversion	Non-Break
4	4008	98.13	107	tRNA	Non-LOH	Non-CNV	Non-Inversion	Non-Break
4	4219	98.13	106	tRNA	Non-LOH	Non-CNV	Non-Inversion	Non-Break
4	553168	95.04	121	tRNA	Non-LOH	Non-CNV	Non-Inversion	Non-Break
4	554854	97.65	84	tRNA	Non-LOH	Non-CNV	Non-Inversion	Non-Break
4	554693	95.56	90	tRNA	Non-LOH	Non-CNV	Non-Inversion	Non-Break
4	1085845	97.96	97	tRNA	Non-LOH	Non-CNV	Non-Inversion	Non-Break
4	1086064	84.66	336	LTR	Non-LOH	Non-CNV	Non-Inversion	Non-Break
4	18849	97.28	2573	ORF	Non-LOH	Non-CNV	Non-Inversion	Non-Break
4	23997	97.28	2577	ORF	Non-LOH	Non-CNV	Non-Inversion	Non-Break
4	697564	97.67	85	tRNA	Non-LOH	Non-CNV	Non-Inversion	Non-Break
4	541022	99.23	517	LTR	Non-LOH	Non-CNV	Non-Inversion	Non-Break
4	29932	95.74	1526	ORF	Non-LOH	Non-CNV	Non-Inversion	Non-Break
4	6135	100	381	Retrotransposon	Non-LOH	Non-CNV	Non-Inversion	Non-Break
4	6895	100	381	Retrotransposon	Non-LOH	Non-CNV	Non-Inversion	Non-Break
4	32982	95.74	1526	ORF	Non-LOH	Non-CNV	Non-Inversion	Non-Break
4	19210	82.57	296	ORF	Non-LOH	Non-CNV	Non-Inversion	Non-Break
4	19805	82.57	301	ORF	Non-LOH	Non-CNV	Non-Inversion	Non-Break
4	234272	94.25	87	tRNA	Non-LOH	Non-CNV	Non-Inversion	Non-Break
4	616286	100	82	tRNA	Non-LOH	Non-CNV	Non-Inversion	Non-Break
4	1609	97.7	86	tRNA	Non-LOH	Non-CNV	Non-Inversion	Non-Break
4	1454	98.77	81	tRNA	Non-LOH	Non-CNV	Non-Inversion	Non-Break
4	553408	95.04	121	tRNA	Non-LOH	Non-CNV	Non-Inversion	Non-Break
4	72	97.67	84	tRNA	Non-LOH	Non-CNV	Non-Inversion	Non-Break
4	554870	95.56	89	tRNA	Non-LOH	Non-CNV	Non-Inversion	Non-Break
4	1613	98.77	80	tRNA	Non-LOH	Non-CNV	Non-Inversion	Non-Break
4	240	97.67	86	tRNA	Non-LOH	Non-CNV	Non-Inversion	Non-Break
4	555021	97.65	85	tRNA	Non-LOH	Non-CNV	Non-Inversion	Non-Break
4	1779	97.7	86	tRNA	Non-LOH	Non-CNV	Non-Inversion	Non-Break
4	4157	99.81	524	Intergenic	Non-LOH	Non-CNV	Non-Inversion	Non-Break
4	489079	99.89	1830	ORF	Non-LOH	Non-CNV	Non-Inversion	Non-Break
4	234272	94.25	86	tRNA	Non-LOH	Non-CNV	Non-Inversion	Non-Break
4	542055	99.23	518	LTR	Non-LOH	Non-CNV	Non-Inversion	Non-Break
4	36016	98.25	2761	ORF	Non-LOH	Non-CNV	Non-Inversion	Non-Break
4	37590	80.82	503	Intergenic	Non-LOH	Non-CNV	Non-Inversion	Non-Break
4	3342	80.16	1385	ORF	Non-LOH	Non-CNV	Non-Inversion	Non-Break
4	6110	80.16	1385	ORF	Non-LOH	Non-CNV	Non-Inversion	Non-Break
4	41569	99.61	2042	ORF	Non-LOH	Non-CNV	Non-Inversion	Non-Break
4	38598	80.82	507	Intergenic	Non-LOH	Non-CNV	Non-Inversion	Non-Break
4	958283	95.19	374	LTR	Non-LOH	Non-CNV	Non-Inversion	Non-Break
4	697564	97.67	86	tRNA	Non-LOH	Non-CNV	Non-Inversion	Non-Break
4	1086038	97.96	98	tRNA	Non-LOH	Non-CNV	Non-Inversion	Non-Break
4	1086725	84.66	327	LTR	Non-LOH	Non-CNV	Non-Inversion	Non-Break
4	492737	99.89	1830	ORF	Non-LOH	Non-CNV	Non-Inversion	Non-Break
4	3	100	79	Intergenic	Non-LOH	Non-CNV	Non-Inversion	Non-Break
4	153	100	79	Intergenic	Non-LOH	Non-CNV	Non-Inversion	Non-Break
5	3233	99.32	2204	ORF	LOH	CNV	Non-Inversion	Break
5	7638	99.32	2203	ORF	Non-LOH	CNV	Non-Inversion	Break
5	12	89.79	235	ORF	Non-LOH	Non-CNV	Non-Inversion	Non-Break
5	258	95.54	112	ORF	Non-LOH	Non-CNV	Non-Inversion	Non-Break
5	480	89.79	235	ORF	Non-LOH	Non-CNV	Non-Inversion	Non-Break
5	480	95.54	112	ORF	Non-LOH	Non-CNV	Non-Inversion	Non-Break
5	552082	95.92	98	tRNA	Non-LOH	Non-CNV	Non-Inversion	Non-Break
5	14	95.74	94	tRNA	Non-LOH	Non-CNV	Non-Inversion	Non-Break
5	200	95.74	94	tRNA	Non-LOH	Non-CNV	Non-Inversion	Non-Break
5	551960	95.61	113	tRNA	Non-LOH	Non-CNV	Non-Inversion	Non-Break
5	864896	100	249	LTR	Non-LOH	Non-CNV	Non-Inversion	Non-Break
5	49546	92.54	199	Intergenic	Non-LOH	Non-CNV	Non-Inversion	Non-Break
5	49944	92.54	201	Intergenic	Non-LOH	Non-CNV	Non-Inversion	Non-Break
5	552276	95.92	98	tRNA	Non-LOH	Non-CNV	Non-Inversion	Non-Break
5	552184	95.61	113	tRNA	Non-LOH	Non-CNV	Non-Inversion	Non-Break
5	11017	99.53	1068	ORF	Non-LOH	Non-CNV	Non-Inversion	Non-Break
5	13152	99.53	1069	ORF	Non-LOH	Non-CNV	Non-Inversion	Non-Break
5	865392	100	249	LTR	Non-LOH	Non-CNV	Non-Inversion	Non-Break
5	7325	96.05	225	Intergenic	Non-LOH	Non-CNV	Non-Inversion	Non-Break
5	5690	89.4	693	Intergenic	Non-LOH	Non-CNV	Non-Inversion	Non-Break
5	7068	89.4	687	Intergenic	Non-LOH	Non-CNV	Non-Inversion	Non-Break
5	7776	96.05	228	Intergenic	Non-LOH	Non-CNV	Non-Inversion	Non-Break
6	11640	86.77	869	ORF	LOH	Non-CNV	Non-Inversion	Break
6	51087	85.14	617	ORF	LOH	Non-CNV	Non-Inversion	Break
6	180330	92.13	6499	ORF	LOH	Non-CNV	Non-Inversion	Break
6	549	100	314	Intergenic	LOH	Non-CNV	Non-Inversion	Break
6	73826	96.35	3783	ORF	Non-LOH	Non-CNV	INVERSION	Break
6	1026922	87.8	305	ORF	Non-LOH	Non-CNV	Non-Inversion	Non-Break
6	985867	91.49	134	tRNA	Non-LOH	Non-CNV	Non-Inversion	Non-Break
6	9910	86.77	863	ORF	Non-LOH	Non-CNV	Non-Inversion	Non-Break
6	30047	81.11	949	ORF	Non-LOH	Non-CNV	Non-Inversion	Non-Break
6	13330	83.08	1492	ORF	Non-LOH	Non-CNV	Non-Inversion	Non-Break
6	31943	81.11	949	ORF	Non-LOH	Non-CNV	Non-Inversion	Non-Break
6	6133	89.89	1272	ORF	Non-LOH	Non-CNV	Non-Inversion	Non-Break
6	8678	89.89	1275	ORF	Non-LOH	Non-CNV	Non-Inversion	Non-Break
6	16312	83.08	1492	ORF	Non-LOH	Non-CNV	Non-Inversion	Non-Break
6	74060	86.65	1263	ORF	Non-LOH	Non-CNV	Non-Inversion	Non-Break
6	4046	100	508	Retrotransposon	Non-LOH	Non-CNV	Non-Inversion	Non-Break
6	5060	100	508	Retrotransposon	Non-LOH	Non-CNV	Non-Inversion	Non-Break
6	52319	85.14	617	ORF	Non-LOH	Non-CNV	Non-Inversion	Non-Break
6	23001	87.45	494	ORF	Non-LOH	Non-CNV	Non-Inversion	Non-Break
6	76577	86.65	1256	ORF	Non-LOH	Non-CNV	Non-Inversion	Non-Break
6	23984	87.45	491	ORF	Non-LOH	Non-CNV	Non-Inversion	Non-Break
6	562642	98.04	509	LTR	Non-LOH	Non-CNV	Non-Inversion	Non-Break
6	74131	87.16	2421	ORF	Non-LOH	Non-CNV	Non-Inversion	Non-Break
6	186945	92.91	141	Intergenic	Non-LOH	Non-CNV	Non-Inversion	Non-Break
6	112974	93.86	3805	ORF	Non-LOH	Non-CNV	Non-Inversion	Non-Break
6	107824	85.49	2454	ORF	Non-LOH	Non-CNV	Non-Inversion	Non-Break
6	79003	87.16	2453	ORF	Non-LOH	Non-CNV	Non-Inversion	Non-Break
6	193301	92.13	6474	ORF	Non-LOH	Non-CNV	Non-Inversion	Non-Break
6	112665	85.41	2389	ORF	Non-LOH	Non-CNV	Non-Inversion	Non-Break
6	120588	93.86	3811	ORF	Non-LOH	Non-CNV	Non-Inversion	Non-Break
6	186945	92.91	141	Intergenic	Non-LOH	Non-CNV	Non-Inversion	Non-Break
6	563657	98.04	508	LTR	Non-LOH	Non-CNV	Non-Inversion	Non-Break
6	1175	100	314	Intergenic	Non-LOH	Non-CNV	Non-Inversion	Non-Break
6	986140	91.49	141	tRNA	Non-LOH	Non-CNV	Non-Inversion	Non-Break
6	605	82.62	1297	ORF	Non-LOH	Non-CNV	Non-Inversion	Non-Break
6	3197	82.62	1297	ORF	Non-LOH	Non-CNV	Non-Inversion	Non-Break
6	1027561	87.8	336	ORF	Non-LOH	Non-CNV	Non-Inversion	Non-Break
7	29199	90.83	661	ORF	Non-LOH	CNV	Non-Inversion	Break
7	1003	88.68	635	ORF	Non-LOH	Non-CNV	Non-Inversion	Non-Break
7	2280	88.68	644	ORF	Non-LOH	Non-CNV	Non-Inversion	Non-Break
7	274339	83.72	471	LTR	Non-LOH	Non-CNV	Non-Inversion	Non-Break
7	405135	86.23	472	LTR	Non-LOH	Non-CNV	Non-Inversion	Non-Break
7	6556	100	470	LTR	Non-LOH	Non-CNV	Non-Inversion	Non-Break
7	7494	100	470	LTR	Non-LOH	Non-CNV	Non-Inversion	Non-Break
7	398115	86.3	467	Retrotransposon	Non-LOH	Non-CNV	Non-Inversion	Non-Break
7	267321	83.91	464	Retrotransposon	Non-LOH	Non-CNV	Non-Inversion	Non-Break
7	5854	99.65	287	Retrotransposon	Non-LOH	Non-CNV	Non-Inversion	Non-Break
7	6427	99.65	288	Retrotransposon	Non-LOH	Non-CNV	Non-Inversion	Non-Break
7	333998	97.28	147	LTR	Non-LOH	Non-CNV	Non-Inversion	Non-Break
7	116782	88.49	1292	ORF	Non-LOH	Non-CNV	Non-Inversion	Non-Break
7	11865	82.61	828	ORF	Non-LOH	Non-CNV	Non-Inversion	Non-Break
7	13518	82.61	827	ORF	Non-LOH	Non-CNV	Non-Inversion	Non-Break
7	104221	98.72	470	LTR	Non-LOH	Non-CNV	Non-Inversion	Non-Break
7	266758	92.84	335	LTR	Non-LOH	Non-CNV	Non-Inversion	Non-Break
7	119365	88.49	1293	ORF	Non-LOH	Non-CNV	Non-Inversion	Non-Break
7	51702	96.28	3573	ORF	Non-LOH	Non-CNV	Non-Inversion	Non-Break
7	27879	90.83	661	ORF	Non-LOH	Non-CNV	Non-Inversion	Non-Break
7	105159	98.72	470	LTR	Non-LOH	Non-CNV	Non-Inversion	Non-Break
7	162074	92.47	332	LTR	Non-LOH	Non-CNV	Non-Inversion	Non-Break
7	26075	92.99	669	ORF	Non-LOH	Non-CNV	Non-Inversion	Non-Break
7	275236	83.72	428	LTR	Non-LOH	Non-CNV	Non-Inversion	Non-Break
7	268204	83.91	421	Retrotransposon	Non-LOH	Non-CNV	Non-Inversion	Non-Break
7	130393	89.88	405	Intergenic	Non-LOH	Non-CNV	Non-Inversion	Non-Break
7	58846	96.28	3573	ORF	Non-LOH	Non-CNV	Non-Inversion	Non-Break
7	27411	92.99	669	ORF	Non-LOH	Non-CNV	Non-Inversion	Non-Break
7	406033	86.23	428	LTR	Non-LOH	Non-CNV	Non-Inversion	Non-Break
7	399003	86.3	423	Retrotransposon	Non-LOH	Non-CNV	Non-Inversion	Non-Break
7	131200	89.88	404	Intergenic	Non-LOH	Non-CNV	Non-Inversion	Non-Break
7	267424	92.84	333	LTR	Non-LOH	Non-CNV	Non-Inversion	Non-Break
7	162734	92.47	330	LTR	Non-LOH	Non-CNV	Non-Inversion	Non-Break
7	334290	97.28	147	LTR	Non-LOH	Non-CNV	Non-Inversion	Non-Break
R	69421	97.81	4753	ORF	LOH	CNV	Non-Inversion	Break
R	35322	99.52	3982	ORF	LOH	Non-CNV	Non-Inversion	Break
R	903	100	103	tRNA	LOH	Non-CNV	Non-Inversion	Break
R	54301	93.76	1378	ORF	Non-LOH	CNV	Non-Inversion	Break
R	57055	93.76	1378	ORF	Non-LOH	CNV	Non-Inversion	Break
R	59915	97.81	4755	ORF	Non-LOH	CNV	Non-Inversion	Break
R	2275666	80.4	792	ORF	Non-LOH	Non-CNV	Non-Inversion	Non-Break
R	1831483	88.43	117	tRNA	Non-LOH	Non-CNV	Non-Inversion	Non-Break
R	1012491	91.52	282	Retrotransposon	Non-LOH	Non-CNV	Non-Inversion	Non-Break
R	1012534	94	1439	ORF	Non-LOH	Non-CNV	Non-Inversion	Non-Break
R	1757265	93.04	473	LTR	Non-LOH	Non-CNV	Non-Inversion	Non-Break
R	1263227	92.98	470	LTR	Non-LOH	Non-CNV	Non-Inversion	Non-Break
R	4206	100	471	LTR	Non-LOH	Non-CNV	Non-Inversion	Non-Break
R	2032176	85.11	450	LTR	Non-LOH	Non-CNV	Non-Inversion	Non-Break
R	1752587	92.87	476	LTR	Non-LOH	Non-CNV	Non-Inversion	Non-Break
R	1258551	92.98	470	LTR	Non-LOH	Non-CNV	Non-Inversion	Non-Break
R	5146	100	471	LTR	Non-LOH	Non-CNV	Non-Inversion	Non-Break
R	2027500	85.11	450	Retrotransposon	Non-LOH	Non-CNV	Non-Inversion	Non-Break
R	1199688	88.98	235	ORF	Non-LOH	Non-CNV	Non-Inversion	Non-Break
R	24352	97.56	205	ORF	Non-LOH	Non-CNV	Non-Inversion	Non-Break
R	23752	96.6	294	ORF	Non-LOH	Non-CNV	Non-Inversion	Non-Break
R	20933	99.11	1349	LTR	Non-LOH	Non-CNV	Non-Inversion	Non-Break
R	19503	89.81	529	ORF	Non-LOH	Non-CNV	Non-Inversion	Non-Break
R	1578122	90.7	379	LTR	Non-LOH	Non-CNV	Non-Inversion	Non-Break
R	1816345	91.75	385	LTR	Non-LOH	Non-CNV	Non-Inversion	Non-Break
R	534105	91.46	395	LTR	Non-LOH	Non-CNV	Non-Inversion	Non-Break
R	20568	89.81	538	ORF	Non-LOH	Non-CNV	Non-Inversion	Non-Break
R	23625	99.11	1345	LTR	Non-LOH	Non-CNV	Non-Inversion	Non-Break
R	24338	96.6	294	ORF	Non-LOH	Non-CNV	Non-Inversion	Non-Break
R	24760	97.56	205	ORF	Non-LOH	Non-CNV	Non-Inversion	Non-Break
R	3332	88.26	2681	ORF	Non-LOH	Non-CNV	Non-Inversion	Non-Break
R	52778	86.89	2664	ORF	Non-LOH	Non-CNV	Non-Inversion	Non-Break
R	166524	81.14	749	ORF	Non-LOH	Non-CNV	Non-Inversion	Non-Break
R	8693	88.26	2682	ORF	Non-LOH	Non-CNV	Non-Inversion	Non-Break
R	51069	85.16	511	ORF	Non-LOH	Non-CNV	Non-Inversion	Non-Break
R	160500	84.29	191	ORF	Non-LOH	Non-CNV	Non-Inversion	Non-Break
R	46752	85.8	2030	ORF	Non-LOH	Non-CNV	Non-Inversion	Non-Break
R	717432	98.82	85	tRNA	Non-LOH	Non-CNV	Non-Inversion	Non-Break
R	50810	85.8	2030	ORF	Non-LOH	Non-CNV	Non-Inversion	Non-Break
R	58101	86.89	2661	ORF	Non-LOH	Non-CNV	Non-Inversion	Non-Break
R	109140	82.76	781	ORF	Non-LOH	Non-CNV	Non-Inversion	Non-Break
R	52089	85.16	511	ORF	Non-LOH	Non-CNV	Non-Inversion	Non-Break
R	1591341	92.61	176	Intergenic	Non-LOH	Non-CNV	Non-Inversion	Non-Break
R	1356259	92.61	203	LTR	Non-LOH	Non-CNV	Non-Inversion	Non-Break
R	1335570	91.5	200	LTR	Non-LOH	Non-CNV	Non-Inversion	Non-Break
R	1344932	98.82	508	LTR	Non-LOH	Non-CNV	Non-Inversion	Non-Break
R	471652	99.41	508	LTR	Non-LOH	Non-CNV	Non-Inversion	Non-Break
R	110695	82.76	776	ORF	Non-LOH	Non-CNV	Non-Inversion	Non-Break
R	160880	84.29	191	ORF	Non-LOH	Non-CNV	Non-Inversion	Non-Break
R	168012	81.14	741	ORF	Non-LOH	Non-CNV	Non-Inversion	Non-Break
R	27358	99.52	3984	ORF	Non-LOH	Non-CNV	Non-Inversion	Non-Break
R	45553	97.7	2733	ORF	Non-LOH	Non-CNV	Non-Inversion	Non-Break
R	57985	98.41	3708	ORF	Non-LOH	Non-CNV	Non-Inversion	Non-Break
R	51016	97.7	2732	ORF	Non-LOH	Non-CNV	Non-Inversion	Non-Break
R	65399	98.41	3708	ORF	Non-LOH	Non-CNV	Non-Inversion	Non-Break
R	534894	91.46	396	LTR	Non-LOH	Non-CNV	Non-Inversion	Non-Break
R	1281832	98.97	389	LTR	Non-LOH	Non-CNV	Non-Inversion	Non-Break
R	79	90.84	130	tRNA	Non-LOH	Non-CNV	Non-Inversion	Non-Break
R	337	90.84	130	tRNA	Non-LOH	Non-CNV	Non-Inversion	Non-Break
R	40353	98.19	1705	ORF	Non-LOH	Non-CNV	Non-Inversion	Non-Break
R	472666	99.41	508	LTR	Non-LOH	Non-CNV	Non-Inversion	Non-Break
R	872772	99.02	509	LTR	Non-LOH	Non-CNV	Non-Inversion	Non-Break
R	43769	98.19	1713	ORF	Non-LOH	Non-CNV	Non-Inversion	Non-Break
R	1013051	91.52	280	Retrotransposon	Non-LOH	Non-CNV	Non-Inversion	Non-Break
R	1015420	94	1449	ORF	Non-LOH	Non-CNV	Non-Inversion	Non-Break
R	31	91.67	96	tRNA	Non-LOH	Non-CNV	Non-Inversion	Non-Break
R	219	91.67	94	tRNA	Non-LOH	Non-CNV	Non-Inversion	Non-Break
R	497	89.36	91	tRNA	Non-LOH	Non-CNV	Non-Inversion	Non-Break
R	677	89.36	91	tRNA	Non-LOH	Non-CNV	Non-Inversion	Non-Break
R	717600	98.82	85	tRNA	Non-LOH	Non-CNV	Non-Inversion	Non-Break
R	239373	100	93	tRNA	Non-LOH	Non-CNV	Non-Inversion	Non-Break
R	9014	100	91	tRNA	Non-LOH	Non-CNV	Non-Inversion	Non-Break
R	230271	100	91	tRNA	Non-LOH	Non-CNV	Non-Inversion	Non-Break
R	9194	100	91	tRNA	Non-LOH	Non-CNV	Non-Inversion	Non-Break
R	26052	93.26	1878	ORF	Non-LOH	Non-CNV	Non-Inversion	Non-Break
R	29797	93.26	1869	ORF	Non-LOH	Non-CNV	Non-Inversion	Non-Break
R	239557	100	93	tRNA	Non-LOH	Non-CNV	Non-Inversion	Non-Break
R	230451	100	91	tRNA	Non-LOH	Non-CNV	Non-Inversion	Non-Break
R	768482	88.45	459	LTR	Non-LOH	Non-CNV	Non-Inversion	Non-Break
R	1264165	92.98	470	LTR	Non-LOH	Non-CNV	Non-Inversion	Non-Break
R	1259489	92.98	470	LTR	Non-LOH	Non-CNV	Non-Inversion	Non-Break
R	493572	87.26	470	LTR	Non-LOH	Non-CNV	Non-Inversion	Non-Break
R	1200155	88.98	234	ORF	Non-LOH	Non-CNV	Non-Inversion	Non-Break
R	69935	97.73	3262	ORF	Non-LOH	Non-CNV	Non-Inversion	Non-Break
R	180649	94.85	97	tRNA	Non-LOH	Non-CNV	Non-Inversion	Non-Break
R	179647	94.85	97	tRNA	Non-LOH	Non-CNV	Non-Inversion	Non-Break
R	491670	97.37	532	LTR	Non-LOH	Non-CNV	Non-Inversion	Non-Break
R	76441	97.73	3246	ORF	Non-LOH	Non-CNV	Non-Inversion	Non-Break
R	33587	87.16	818	ORF	Non-LOH	Non-CNV	Non-Inversion	Non-Break
R	168942	95.56	89	tRNA	Non-LOH	Non-CNV	Non-Inversion	Non-Break
R	35218	87.16	815	ORF	Non-LOH	Non-CNV	Non-Inversion	Non-Break
R	179838	94.85	96	tRNA	Non-LOH	Non-CNV	Non-Inversion	Non-Break
R	1107	100	103	tRNA	Non-LOH	Non-CNV	Non-Inversion	Non-Break
R	180840	94.85	96	tRNA	Non-LOH	Non-CNV	Non-Inversion	Non-Break
R	84	92.81	139	ORF	Non-LOH	Non-CNV	Non-Inversion	Non-Break
R	360	92.81	139	ORF	Non-LOH	Non-CNV	Non-Inversion	Non-Break
R	1831719	88.43	121	tRNA	Non-LOH	Non-CNV	Non-Inversion	Non-Break
R	169118	95.56	89	tRNA	Non-LOH	Non-CNV	Non-Inversion	Non-Break
R	83996	94.44	90	Intergenic	Non-LOH	Non-CNV	Non-Inversion	Non-Break
R	2853	95.76	165	Intergenic	Non-LOH	Non-CNV	Non-Inversion	Non-Break
R	12516	97.49	199	Intergenic	Non-LOH	Non-CNV	Non-Inversion	Non-Break
R	12466	100	294	Intergenic	Non-LOH	Non-CNV	Non-Inversion	Non-Break
R	3181	95.76	165	Intergenic	Non-LOH	Non-CNV	Non-Inversion	Non-Break
R	1066	96.05	76	Intergenic	Non-LOH	Non-CNV	Non-Inversion	Non-Break
R	147	83.25	388	Intergenic	Non-LOH	Non-CNV	Non-Inversion	Non-Break
R	270	87.97	156	Intergenic	Non-LOH	Non-CNV	Non-Inversion	Non-Break
R	476	90.7	128	Intergenic	Non-LOH	Non-CNV	Non-Inversion	Non-Break
R	612	83.25	373	Intergenic	Non-LOH	Non-CNV	Non-Inversion	Non-Break
R	8	95.7	93	Intergenic	Non-LOH	Non-CNV	Non-Inversion	Non-Break
R	191	95.7	92	Intergenic	Non-LOH	Non-CNV	Non-Inversion	Non-Break
R	577	87.97	153	Intergenic	Non-LOH	Non-CNV	Non-Inversion	Non-Break
R	460	94.44	87	Intergenic	Non-LOH	Non-CNV	Non-Inversion	Non-Break
R	726	90.7	124	Intergenic	Non-LOH	Non-CNV	Non-Inversion	Non-Break
R	116	83.25	186	Intergenic	Non-LOH	Non-CNV	Non-Inversion	Non-Break
R	257	83.25	189	Intergenic	Non-LOH	Non-CNV	Non-Inversion	Non-Break
R	1214	96.05	74	Intergenic	Non-LOH	Non-CNV	Non-Inversion	Non-Break
R	634	94.44	89	Intergenic	Non-LOH	Non-CNV	Non-Inversion	Non-Break
R	8166	100	71	Intergenic	Non-LOH	Non-CNV	Non-Inversion	Non-Break
R	12912	97.49	199	Intergenic	Non-LOH	Non-CNV	Non-Inversion	Non-Break
R	13052	100	294	Intergenic	Non-LOH	Non-CNV	Non-Inversion	Non-Break
R	8306	100	71	Intergenic	Non-LOH	Non-CNV	Non-Inversion	Non-Break
R	257615	99.58	472	LTR	Non-LOH	Non-CNV	Non-Inversion	Non-Break
R	20499	92.65	244	LTR	Non-LOH	Non-CNV	Non-Inversion	Non-Break
R	1335962	91.5	194	LTR	Non-LOH	Non-CNV	Non-Inversion	Non-Break
R	255554	93.45	167	LTR	Non-LOH	Non-CNV	Non-Inversion	Non-Break
R	84174	94.44	90	Intergenic	Non-LOH	Non-CNV	Non-Inversion	Non-Break
R	235055	97.09	172	LTR	Non-LOH	Non-CNV	Non-Inversion	Non-Break
R	1356658	92.61	198	LTR	Non-LOH	Non-CNV	Non-Inversion	Non-Break
R	20986	92.65	245	LTR	Non-LOH	Non-CNV	Non-Inversion	Non-Break
R	1753536	92.87	475	LTR	Non-LOH	Non-CNV	Non-Inversion	Non-Break
R	1758209	93.04	473	LTR	Non-LOH	Non-CNV	Non-Inversion	Non-Break
R	494510	87.26	470	LTR	Non-LOH	Non-CNV	Non-Inversion	Non-Break
R	1345946	98.82	508	LTR	Non-LOH	Non-CNV	Non-Inversion	Non-Break
R	873788	99.02	509	LTR	Non-LOH	Non-CNV	Non-Inversion	Non-Break
R	1578885	90.7	386	LTR	Non-LOH	Non-CNV	Non-Inversion	Non-Break
R	18	86.36	88	ORF	Non-LOH	Non-CNV	Non-Inversion	Non-Break
R	189	86.36	85	ORF	Non-LOH	Non-CNV	Non-Inversion	Non-Break
R	492732	97.37	532	LTR	Non-LOH	Non-CNV	Non-Inversion	Non-Break
R	103459	87.46	335	LTR	Non-LOH	Non-CNV	Non-Inversion	Non-Break
R	258556	99.58	471	LTR	Non-LOH	Non-CNV	Non-Inversion	Non-Break
R	7	91.6	117	ORF	Non-LOH	Non-CNV	Non-Inversion	Non-Break
R	241	91.6	119	ORF	Non-LOH	Non-CNV	Non-Inversion	Non-Break
R	235055	97.09	172	LTR	Non-LOH	Non-CNV	Non-Inversion	Non-Break
R	1591686	92.61	171	Intergenic	Non-LOH	Non-CNV	Non-Inversion	Non-Break
R	255887	93.45	168	LTR	Non-LOH	Non-CNV	Non-Inversion	Non-Break
R	769388	88.45	449	LTR	Non-LOH	Non-CNV	Non-Inversion	Non-Break
R	2033064	85.11	440	LTR	Non-LOH	Non-CNV	Non-Inversion	Non-Break
R	2028388	85.11	440	Retrotransposon	Non-LOH	Non-CNV	Non-Inversion	Non-Break
R	1817115	91.75	387	LTR	Non-LOH	Non-CNV	Non-Inversion	Non-Break
R	1282609	98.97	390	LTR	Non-LOH	Non-CNV	Non-Inversion	Non-Break
R	104093	87.46	301	LTR	Non-LOH	Non-CNV	Non-Inversion	Non-Break
R	2277317	82.49	861	ORF	Non-LOH	Non-CNV	Non-Inversion	Non-Break
