# Supplementary material for: Genome plasticity in Candida albicans is driven by long repeat sequences
Source: eLife journal article supplement (doi:10.7554/elife.45954), 2019-06-07
Supplement: supp [file elife-45954-supp-v1.zip › elife_poa_e45954_Figure_2_source_data_3.xlsx]

## Sheet: Figure 2-figure supplement 3A
These data were generated from Supplementary File 2
These data were used in generating Figure 2-figure supplement 3A
Statistics found to the right of the data tables
* p<0.05, **p<0.01, ***p<0.001, ****p<0.0001
	n=49	n=69	n= 110	n= 665	n= 560	n= 126	n= 16	n= 24	n= 100	n=234
	Intergenic Intra Chr Sequence Identity	Intergenic Inter Chr Sequence Identity	LTR Inter Chr Sequence Identity	LTR Intra Chr Sequence Identity	ORF Inter Chr Sequence Identity	ORF Intra Chr Sequence Identity	Retrotransposon Inter Chr Sequence Identity	Retrotransposon Intra Chr Sequence Identity	tRNA Intra Chr Sequence Identity	tRNA Inter Chr Sequence Identity			Null Hypothesis: There is no significant difference in the distribution of percent sequence identity between inter- and intra-chromosomal long repeat sequences containing all genomic features.
	87.53	89.86	94.13	83.09	92.35	95	85.11	98.73	100	95.51			Kruskal-Wallis test
	87.53	96.11	90.04	85.56	88.89	100	85.11	98.73	95.24	98.77			P value	< 0.0001
	99.81	95.48	90.04	94.88	88.89	95	86.3	98.09	96.91	93.91			Exact or approximate P value?	Approximate
	99.81	94.4	89.64	90.34	87.8	94.9	83.91	96.54	97.67	94.29			P value summary	****
	80.82	100	83.72	91.87	87.8	100	83.91	87.47	97.67	97.78			Do the medians vary signif. (P < 0.05)	Yes
	80.82	100	86.23	90	89.81	100	86.3	96.54	98.86	96.63			Number of groups	10
	100	92.62	88.45	83.71	89.81	100	91.52	98.73	86.67	94.44			Kruskal-Wallis statistic	617.5
	100	84.24	90.7	83.41	92.35	94.9	91.52	98.1	84.87	98.97
	92.54	85.59	87.46	97.47	91.46	100	99.36	98.77	97.64	98.97			Dunn's multiple comparisons test	Mean rank diff.	Significant?	Summary
	92.54	94.34	88.45	97.84	92.5	85.4	99.36	95.76	95.24	98.82
	96.05	83.64	87.46	95.9	92.5	90.86	100	96.11	82.05	96.47			Intergenic Intra Chr Sequence Identity vs. Intergenic Inter Chr Sequence Identity	60.37	No	ns
	89.4	97.63	85.31	90.32	91.46	85.4	100	94.06	84.87	97.65			LTR Inter Chr Sequence Identity vs. LTR Intra Chr Sequence Identity	-14.8	No	ns
	89.4	90.48	94.13	93.61	92.61	90.86	100	94.06	86.67	100			ORF Inter Chr Sequence Identity vs. ORF Intra Chr Sequence Identity	-165.7	No	ns
	96.05	88.89	94.38	87.69	97.64	84.99	100	94.68	82.05	100			Retrotransposon Inter Chr Sequence Identity vs. Retrotransposon Intra Chr Sequence Identity	-27.1	No	ns
	92.91	85.41	89.64	90.91	82.59	97.45	99.65	85.88	100	100			tRNA Intra Chr Sequence Identity vs. tRNA Inter Chr Sequence Identity	-91.41	No	ns
	92.91	89.08	85.31	87.01	97.64	83.92	99.65	96.11	97.64	98.72
	91.52	86.85	94.38	85.11	82.59	88.24		95.76	96.91	100
	81.83	98.39	96.54	85.71	89.78	84.85		93.05	98.86	99.21			Test details	Mean rank 1	Mean rank 2	Mean rank diff.	n1	n2
	81.83	98.61	96.12	87.5	82.99	90.96		93.05	89.89	98.44
	100	92.62	92.79	93.33	82.99	89.31		86.71	89.89	91.07			Intergenic Intra Chr Sequence Identity vs. Intergenic Inter Chr Sequence Identity	1050	989.7	60.37	49	69
	100	89.71	96.54	97.49	84.41	97.58		94.06	99.44	93.33			Intergenic Inter Chr Sequence Identity vs. tRNA Inter Chr Sequence Identity	989.7	1396	-405.9	69	234
	89.88	86.48	92.79	97.47	84.41	96.5		94.06	98.06	97.65			LTR Inter Chr Sequence Identity vs. LTR Intra Chr Sequence Identity	1142	1157	-14.8	110	665
	89.88	97.63	96.12	90.34	92.61	89.64		92.5	99.44	98.8			ORF Inter Chr Sequence Identity vs. ORF Intra Chr Sequence Identity	536.4	702.1	-165.7	560	126
	92.61	91.14	83.72	97.49	99.02	80.54		92.5	97.03	97.67			Retrotransposon Inter Chr Sequence Identity vs. Retrotransposon Intra Chr Sequence Identity	1172	1200	-27.1	16	24
	94.44	91.08	86.23	87.69	99.02	81.63			98.02	98.41			tRNA Intra Chr Sequence Identity vs. tRNA Inter Chr Sequence Identity	1304	1396	-91.41	100	234
	95.76	94.35	97.28	87.47	83.14	89.42			95.88	97.62
	97.49	94.4	92.84	84.89	81.51	84.94			98.02	98.57			* p<0.05, **p<0.01, ***p<0.001, ****p<0.0001
	100	100	92.47	94.71	88.4	99.57			97.94	98.25
	95.76	89.08	92.84	90.71	83.14	91.13			95.88	96.47
	96.05	86.94	92.47	83.48	81.51	90.36			97.94	96.67
	83.25	97.84	97.28	83.91	88.4	90.89			97.03	98.88
	87.97	89.86	92.61	85.56	96.47	98.48			98.06	91.79
	90.7	88.45	91.5	85.48	96.47	80.68			98.8	87.69
	83.25	89.71	91.5	86.3	92.41	99.85			92.59	97.67
	95.7	88.42	93.45	85.48	92.41	81.63			89.34	98.44
	95.7	85.41	97.09	83.48	84.51	87.11			95.41	97.71
	87.97	85.59	92.61	90.32	93.78	80.79			98.95	97.14
	94.44	88.89	97.09	90.71	93.78	82.22			92.16	91.24
	90.7	95.73	93.45	94.88	84.51	89.42			95.41	87.41
	83.25	92.5	85.11	86.3	89.78	81.28			92.79	95.45
	83.25	91.1	85.11	83.91	80.47	92.81			89.34	100
	96.05	95.73	92.41	84.8	80.47	83.11			92.79	100
	94.44	92.5	99.74	85.71	84.04	80.34			92.16	100
	100	86.94	92.66	93.57	84.04	99.57			98.8	98.72
	97.49	86.48	99.74	94.88	98	88.64			92.59	97.77
	100	88.45	95.16	94.35	98	90.26			98.95	98.33
	100	94.35	92.41	94.88	89.2	97.45			100	92.27
	94.44	86.85	92.66	86.59	88.34	83			98.13	96.28
	92.61	98.73	97.5	90.64	88.34	87.11			98.13	100
		96.11	93.23	85.29	90.22	89.31			95.04	98.8
		98.73	95.16	92.44	89.2	90.96			97.65	98.78
		88.42	93.23	89.87	90.22	98.48			95.56	97.62
		91.08	95.79	90.64	87.63	90.36			97.96	92.11
		96.11	97.5	93.75	87.63	93.85			97.67	93.75
		96.11	95.79	94.21	83.71	91.39			94.25	89.36
		95.41	96.6	88.5	83.5	85.29			100	94.9
		83.64	99.15	89.38	98.43	84.73			97.7	98.73
		94.34	99.15	89.33	96.19	83.69			98.77	100
		95.48	96.6	87.79	89.17	89.64			95.04	97.53
		93.64	89.72	94.62	89.17	90.27			97.67	97.65
		98.61	89.01	94.38	96.19	91.89			95.56	100
		94.35	89.72	93.76	98.43	90.27			98.77	95.51
		98.73	89.01	94.13	83.71	89.04			97.67	91.23
		95.41	84.66	93.51	90.31	84.66			97.65	91.58
		98.73	95.19	94.38	83.5	84.85			97.7	94.19
		98.39	99.23	94.36	90.31	100			94.25	89.55
		93.64	99.23	92.7	86.42	96.81			97.67	96.04
		84.24	95.19	87.35	88.55	81.61			97.96	98.99
		90.48	84.66	95.27	88.55	90.21			95.92	100
			100	91.16	83.98	89.69			95.74	100
			100	86.71	83.98	89.91			95.74	100
			98.04	86.71	86.42	91.88			95.61	93.97
			98.04	87.01	80.14	93.85			95.92	95.88
			100	86.71	84.78	90.26			95.61	100
			100	86.14	89.87	87.07			91.49	92.38
			98.72	92.15	88.07	83.11			91.49	97.03
			98.72	86.53	81.09	84.94			88.43	97.78
			93.04	85.88	84.23	98.34			98.82	98.88
			92.98	86.44	81.34	100			90.84	97.75
			100	85.88	89.08	96.81			90.84	98.82
			92.87	91.18	82.01	83			91.67	96.47
			92.98	94.05	83.99	84.34			91.67	93.91
			100	87.76	84.87	85.29			89.36	91.07
			99.11	99.3	81.09	91.39			89.36	94.17
			90.7	89.71	85.18	84.73			98.82	98.04
			91.75	97.87	80.46	83.52			100	97.03
			91.46	95.79	87.79	84.43			100	99.17
			99.11	89.33	85.23	82.5			100	100
			98.82	95.67	90.85	81.71			100	97.7
			99.41	85.34	81.02	80.23			100	100
			91.46	96.54	88.24	81.31			100	95.88
			98.97	95.67	80.14	83.02			94.85	97.67
			99.41	84.91	82.12	80.79			94.85	97.67
			99.02	87.35	89.41	99.85			95.56	95.73
			92.98	86.71	81.78	81.61			100	94.64
			92.98	93.05	82.85	84.99			94.85	96.3
			87.26	86.71	81.09	89.97			100	97.06
			97.37	93.05	81.34	84.51			94.85	100
			99.58	84.8	95.05	91.88			88.43	98.04
			92.65	91.16	82.71	98.34			95.56	98.33
			92.65	91.18	83.4	91.13				92.27
			92.87	94.05	83.9	90.89				100
			93.04	86.59	80.29	83.92				93.33
			87.26	92.7	89.41	82.22				97.35
			98.82	94.53	95.05	81.28				97.17
			99.02	95.9	83.4	80.34				94.55
			97.37	94.26	81.05	83.69				90.98
			99.58	95.9	89.87	88.64				88.99
			91.75	96	90.85	87.07				91.82
			98.97	93.57	89.08	88.24				92.08
				99.3	86.09	84.66				97.73
				99.29	89.43	84.51				96.47
				99.29	89.43	89.97				96.47
				99.3	86.09	97.58				96.47
				96.72	94.64	96.5				94.44
				93.07	94.64	90.27				98.8
				96.58	97.7	80.23				97.59
				97.59	80.38	84.43				100
				90.64	83.82	81.71				97.59
				99.29	83.82	81.01				95.73
				94.26	81.41	81.31				98.25
				90.84	95.79	84.57				96.28
				89.71	97	84.34				100
				94.62	97.7	83.02				97.77
				94.38	97.79	80.54				97.03
				89.71	97.79	92.81				99.17
				87.01	88.05					95.51
				87.5	88.05					97.59
				87.47	84.33					89.36
				88.68	84.33					94.9
				85.29	82.27					100
				88.5	87.69					97.53
				86.59	82.27					92.11
				86.59	87.29					96.39
				86.59	87.29					98.97
				86.64	99.53					96.91
				84.48	99.53					91.23
				94.53	89.32					97.56
				87.82	86.97					100
				99.29	86.97					98.75
				94.88	89.32					97.59
				92.82	93.37					93.75
				95.67	93.37					98.78
				87.01	94.11					97.56
				93.13	99.13					96.67
				99.3	83.98					98.8
				87.76	94.91					94.19
				95.9	99.13					91.58
				92.44	94.11					89.55
				89.87	94.91					97.03
				90.91	82.5					93.14
				93.76	83.06					95.88
				88.89	92.39					98.97
				92.16	92.41					93.33
				92.79	83.06					96.91
				94.13	92.39					97.06
				89.07	92.41					88.99
				88.84	82.5					97.35
				94.88	83.98					94.64
				85.88	81.57					97.14
				89.07	81.57					91.82
				89.75	99.83					97.17
				89.71	99.7					92.08
				89.71	96.98					96.3
				89.71	96.41					94.55
				88.89	86.7					97.75
				89.3	96.41					96.63
				89.41	92.39					96.67
				92.79	95.18					97.73
				93.07	86.7					97.65
				92.16	96.84					88.8
				85.34	92.39					91.24
				86.71	95.18					95.38
				97.87	97.75					91.79
				96.63	92.6					92.68
				86.14	92.6					100
				92.82	97.75					97.62
				94.52	99.7					97.71
				93.13	99.83					98.48
				93.05	89.92					92.68
				93.05	89.92					98.77
				92.15	98.34					98.8
				95.27	98.34					100
				94.06	97.28					99.21
				89.38	97.28					98.41
				93.75	95.74					98.48
				94.21	95.74					97.14
				96.54	82.57					98.57
				84.48	82.57					100
				96.72	99.89					98.8
				94.71	98.25					100
				93.61	80.16					95.73
				94.06	80.16					93.33
				91.18	99.34					94.29
				91.18	99.61					94.17
				93.51	99.89					95.45
				89.75	89.79					97.59
				86.59	95.54					97.7
				89.3	89.79					97.59
				94.36	95.54					100
				95.67	99.32					100
				92.15	99.32					98.99
				92.15	99.53					96.91
				95.79	99.53					95.88
				97.59	86.77					95.51
				96.63	86.77					98.73
				94.35	81.11					98.75
				86.44	83.08					100
				93.2	81.11					97.67
				96.58	89.89					97.67
				97.87	89.89					93.97
				97.87	83.08					92.38
				86.53	86.65					93.14
				92.81	85.14					96.04
				84.91	85.14					88.8
				89.41	87.45					87.69
				94.38	86.65					95.38
				85.88	87.45					87.41
				94.05	92.13					96.91
				94.05	87.16					97.17
				85.11	93.86					97.17
				84.89	96.35					97.14
				86.64	85.49					95.73
				88.68	87.16					90.98
				90.84	92.13					97.59
				88.84	85.41					97.56
				98.63	93.86					97.53
				98.73	88.84					97.53
				98.09	89.47					100
				98.63	82.46					96.67
				98.1	86.97					97.62
				88.34	86.97					97.59
				87.99	88.84					96.39
				87.28	88.39					97.56
				88.34	82.11
				87.99	80.91
				87.28	88
				88.34	88.65
				87.99	89.34
				91.87	87.04
				87.5	89.84
				87.47	82.25
				90.5	87.04
				93.11	89.84
				86.98	89.34
				93.11	88.65
				87.5	82.56
				98.77	88
				93.22	86.62
				93.47	88.89
				99.36	88.74
				99.36	88.51
				99.36	87.81
				95.32	88.14
				98.94	88.74
				92.8	88.14
				95.16	88.01
				94.35	87.81
				95.18	88.16
				93.95	87.25
				99.69	89.28
				98.39	81.07
				98.53	83.58
				99.49	84.04
				97.97	81.59
				94.68	86.12
				98.23	81.58
				98.49	82.77
				98.46	80.62
				91.21	82.12
				95.45	82.67
				97.15	80.99
				96.47	81.84
				98.21	81.73
				98.21	80.47
				95.79	83.49
				93.66	82.3
				93.31	81.95
				92.96	84.08
				92.96	82.24
				92.25	83.06
				92.53	81.16
				92.5	89.85
				86.71	89.74
				86.98	83.14
				85.88	83.12
				98.99	82.04
				97.99	82.69
				97.86	81.54
				97.87	80.89
				93.47	82.73
				99.01	81.3
				99.01	85.45
				98.46	83.57
				100	81.84
				100	82.2
				92.37	86.39
				95.24	80.24
				99.61	81
				100	83.08
				99.61	82.13
				99.61	80.57
				99.41	84.03
				99.02	84.02
				98.04	83.7
				91.36	81.05
				99.61	81.66
				94.65	82.7
				97.7	80.44
				100	81.32
				89.2	82.24
				93.71	81.59
				93.81	82.84
				93.75	81.46
				88.78	91.46
				99.22	83.68
				99.22	84.04
				89.55	80.29
				98.11	83.36
				95.73	82.81
				95.37	85.29
				96.5	82.27
				97.01	83.68
				99.41	80
				98.95	80.42
				95.04	81.58
				95.37	80.43
				93.66	82.69
				98.55	80.62
				90.07	86.65
				97.46	82.29
				97.97	85.35
				100	86.69
				100	82.04
				99.15	84.03
				92.99	83.12
				92.14	81.48
				93.43	82.74
				93.02	81.21
				94.96	84.02
				96.53	81.73
				92.83	80.07
				93.6	80.97
				92.8	82.11
				95.22	82.55
				94.82	84.57
				91.24	82.23
				95.24	84.67
				95.24	85.53
				96	95.42
				99.57	81.34
				99.15	88.91
				99.15	82.46
				93.84	81.03
				93.84	84.04
				92.99	86.01
				92.98	81.97
				93.47	81.97
				95.45	88.39
				93.22	89.47
				97.61	92.92
				98.53	82.56
				89.2	82.58
				88.81	81.17
				97.87	80.16
				98.58	81.64
				93.06	83.04
				96.47	85.47
				96.09	87.34
				96.09	92.72
				96.09	80.42
				95.73	81.32
				95.37	81.47
				94.8	81.85
				87.72	80.69
				98.24	80
				98.23	80.21
				91.49	81.2
				98.71	81.85
				100	85.5
				100	80.07
				100	82.62
				100	81.73
				100	80.77
				100	81.93
				94.79	80.49
				91.59	80.29
				93.13	81.49
				95.28	83.55
				94.97	80.73
				94.67	82.5
				94.65	80.03
				94.65	80.07
				93.85	80.97
				93.96	85.68
				92.59	82.92
				92.96	81.38
				97.82	82.48
				98.99	81.9
				97.99	81.62
				98.39	83.69
				98.07	81.85
				89.55	83.62
				90.07	81.14
				90.07	81.86
				89.72	81.73
				92.53	84.31
				90.73	81.98
				91.59	81.2
				90.41	80.84
				91.24	94.06
				91.55	84.38
				91.36	80.21
				91.18	81.9
				91.16	80.78
				91.16	80.5
				94.8	80.45
				90.64	81.74
				97.7	85.04
				98.57	80.91
				98.12	80
				99.25	88.32
				97.09	82.66
				92.25	87
				98.46	83.69
				98.82	81.28
				91.86	82.47
				94.82	82.48
				99.2	83.85
				94.35	80.71
				87.34	82.33
				90.64	82.74
				87.72	81.45
				96.33	80.9
				96.53	84.05
				91.54	87.17
				88.34	80.8
				87.99	83.01
				90	82.92
				92.59	84.06
				93.33	82.37
				100	82.06
				99.61	84.54
				99.41	84.96
				99.61	86.96
				99.41	81.38
				98.43	81.57
				91.55	82.71
				99.61	81.4
				95.28	81.85
				99.22	83.22
				99.74	84.67
				99.74	81.92
				99.22	83.2
				99.61	80.18
				99.61	81.47
				99.61	89.93
				99.41	80.31
				99.02	81.32
				98.43	83.07
				91.18	81.55
				94.67	88.8
				100	80.77
				97.61	80.8
				97.46	82.53
				99.49	80.02
				93.81	81.04
				94.24	82.25
				88.89	80.84
				96.79	80.23
				90.64	82.78
				93.6	81.84
				93.31	92.14
				98.18	84.67
				90.07	84.63
				92.78	80.02
				88.78	89.93
				88.89	81.49
				98.82	80.42
				92.52	81.58
				95.18	81.74
				100	84.63
				95.22	82.71
				95.55	84.67
				95.97	82.55
				94.52	81.58
				95.96	85.64
				95.32	94.06
				95.97	81.9
				93.53	83.63
				99.15	82.62
				92.58	82.62
				99.15	93.08
				99.57	96.01
				99.15	95.22
				93.42	96.01
				92.98	95.22
				99.69	93.08
				98.07	88.68
				100	88.68
				95.24	88.49
				92.37	82.61
				99.2	82.61
				95.16	88.49
				92.96	96.28
				97.82	90.83
				89.72	92.99
				99.01	90.83
				99.01	96.28
				93.13	92.99
				98.04	94
				90.41	88.98
				98.43	97.56
				98.43	96.6
				98.04	96.6
				97.84	97.56
				98.04	93.76
				99.61	88.26
				99.61	86.89
				99.61	81.14
				99.41	88.26
				91.16	85.16
				99.61	84.29
				99.02	85.8
				94.65	93.76
				100	85.8
				94.24	86.89
				93.75	82.76
				92.78	85.16
				96.33	82.76
				92.83	84.29
				96.79	81.14
				89.81	99.52
				99.36	99.52
				100	97.7
				95.96	98.41
				99.58	97.7
				99.58	98.41
				99.36	98.19
				100	98.19
				95.97	94
				96.5	93.26
				99.41	93.26
				98.21	88.98
				96.09	81.85
				95.74	80.44
				97.01	80.44
				98.95	81.85
				98.21	97.81
				96.09	97.73
				95.74	97.81
				92.5	97.73
				98.11	87.16
				98.55	87.16
				98.18	92.81
				97.82	92.81
				97.82	86.36
				97.09	86.36
				93.53	91.6
				93.43	91.6
				87.74
				99.15
				93.84
				93.42
				93.42
				100
				98.57
				92.58
				92.16
				92.18
				98.73
				92.99
				92.14
				86.84
				83.09
				99.36
				92.81
				99.74
				99.74
				92.18
				100
				99.15
				93.42
				99.15
				99.15
				100
				99.15
				93.42
				92.16
				91.21
				91.49
				91.86
				92.52
				93.95
				92.37
				92.37
				91.24
				90.73
				93.85
				98.04
				99.41
				99.41
				99.41
				99.41
				100
				98.71
				98.46
				98.04
				100
				99.61
				99.61
				99.61
				99.61
				91.16
				94.97
				99.36
				93.02
				87.74
				92.98
				92.98
				86.84
				99.25
				99.58
				98.94
				99.58
				95.55
				93.96
				98.58
				97.86
				93.47
				93.06
				98.73
				99.15
				93.84
				93.42
				92.99
				99.41
				99.02
				99.02
				99.02
				97.84
				91.24
				94.79
				93.71
				88.81
				90.5
				98.12
				95.79
				96.09
				95.37
				95.74
				95.74
				95.04
				97.99
				97.99
				91.54
				90.64
				89.81
				94.96
				95.97
				100
				99.36
				100
				98.49
				98.24

## Sheet: Figure 2-figure supplement 3B
These data were generated from Supplementary File 2
These data were used in generating Figure 2-figure supplement 3B
Statistics found to the right of the data tables
* p<0.05, **p<0.01, ***p<0.001, ****p<0.0001
	n=49	n= 69	n= 665	n= 110	n= 145	n= 562	n= 24	n= 16	n= 100	n= 234
	Intergenic Intra Chr Length	Intergenic Inter Chr Length	LTR Inter Chr Length	LTR Intra Chr Length	ORF Inter Chr Length	ORF Intra Chr Length	Retrotransposon Inter Chr Length	Retrotransposon Intra Chr Length	tRNA Intra Chr Length	tRNA Inter Chr Length			Null Hypothesis: There is no significant difference in the distribution of copy length between inter- and intra-chromosomal long repeat sequences containing all genomic features.
	385	221	387	385	1850	170	813	313	83	88			Kruskal-Wallis test
	393	125	387	386	785	1639	231	313	104	81			P value	< 0.0001
	524	95	471	385	453	120	313	381	95	114			Exact or approximate P value?	Approximate
	524	93	472	386	97	120	314	381	84	105			P value summary	****
	503	149	471	374	79	1639	488	508	86	89			Do the medians vary signif. (P < 0.05)	Yes
	507	298	470	159	441	257	282	508	88	88			Number of groups	10
	79	319	470	247	295	1648	282	467	115	90			Kruskal-Wallis statistic	1095
	79	212	470	375	343	1025	219	464	115	97
	199	206	471	393	393	1651	219	287	127	97			Dunn's multiple comparisons test	Mean rank diff.	Significant?	Summary
	201	379	139	393	331	1025	314	288	105	84
	225	211	246	280	429	1658	314	421	116	83			Intergenic Intra Chr Length vs. Intergenic Inter Chr Length	-5.101	No	ns
	693	231	247	409	415	194	803	423	117	84			LTR Inter Chr Length vs. LTR Intra Chr Length	-115	No	ns
	687	234	247	278	625	191	374	282	116	75			ORF Inter Chr Length vs. ORF Intra Chr Length	-265.6	Yes	****
	228	233	248	263	392	601	159	450	114	77			Retrotransposon Inter Chr Length vs. Retrotransposon Intra Chr Length	-180.7	No	ns
	141	281	248	250	1161	601	283	280	83	77			tRNA Intra Chr Length vs. tRNA Inter Chr Length	23.08	No	ns
	141	212	325	177	599	257	283	440	127	78
	223	247	311	278	386	1121	329		97	126
	625	72	204	248	386	1121	470		87	126			Test details	Mean rank 1	Mean rank 2	Mean rank diff.	n1	n2
	612	146	196	407	651	337	331		176	128
	314	349	197	248	364	409	331		177	110			Intergenic Intra Chr Length vs. Intergenic Inter Chr Length	681.7	686.8	-5.101	49	69
	314	351	371	262	161	809	231		177	105			LTR Inter Chr Length vs. LTR Intra Chr Length	935.6	1051	-115	665	110
	405	210	371	284	363	337	218		103	85			ORF Inter Chr Length vs. ORF Intra Chr Length	1223	1489	-265.6	145	562
	404	235	371	280	357	409	218		177	83			Retrotransposon Inter Chr Length vs. Retrotransposon Intra Chr Length	948.8	1130	-180.7	24	16
	176	212	371	285	201	809	312		101	129			tRNA Intra Chr Length vs. tRNA Inter Chr Length	243.2	220.2	23.08	100	234
	90	123	376	231	1029	2861			101	126
	165	124	396	232	1399	2860			96	126			* p<0.05, **p<0.01, ***p<0.001, ****p<0.0001
	199	95	397	208	202	290			101	140
	294	279	389	202	765	290			96	113
	165	220	386	471	1185	170			97	85
	76	277	259	231	396	863			97	90
	388	206	393	207	408	1334			101	89
	156	351	238	471	679	1320			102	133
	128	348	235	232	353	863			83	129
	373	256	238	206	389	1662			157	129
	93	221	238	276	100	1571			117	128
	92	332	235	278	97	1571			107	131
	153	223	235	278	79	1110			190	140
	87	117	128	276	79	1113			101	135
	124	118	121	336	77	200			109	133
	186	234	281	367	316	200			106	87
	189	117	226	517	378	1491			116	82
	74	120	226	518	1179	1526			108	76
	89	222	225	374	1161	1526			97	78
	71	354	213	327	483	1462			83	78
	199	355	282	249	290	1491			161	177
	294	230	280	249	1332	1462			190	178
	71	202	280	509	1105	186			82	229
	90	316	284	508	1399	183			107	186
	171	283	418	471	1136	1403			106	77
		314	409	472	1150	818			121	82
		283	409	470	785	320			84	82
		258	417	470	161	323			90	82
		212	409	147	197	893			97	113
		283	416	470	641	4122			85	112
		283	409	335	317	1233			87	186
		283	408	470	393	1230			82	98
		344	397	332	343	3987			86	79
		212	166	428	392	892			81	81
		221	281	428	765	1403			121	81
		173	281	333	97	908			84	85
		72	281	330	79	818			89	76
		230	281	147	537	908			80	89
		314	281	473	3558	853			86	113
		281	278	470	170	427			85	92
		312	277	471	845	427			86	86
		248	278	450	935	666			86	133
		173	147	476	415	667			86	101
		301	248	470	411	862			98	98
		231	599	471	185	281			98	92
			318	1349	185	223			94	92
			318	379	228	298			94	78
			318	385	349	508			113	116
			318	395	377	1369			98	97
			319	1345	295	219			113	73
			318	203	65	792			134	105
			321	200	94	168			141	101
			318	508	1298	268			117	90
			325	508	194	531			85	89
			177	396	194	780			130	89
			177	389	228	938			130	85
			177	508	411	1353			96	84
			177	509	378	435			94	114
			199	459	271	916			91	110
			199	470	616	582			91	103
			280	470	344	287			85	100
			282	470	537	1393			93	101
			205	532	1147	116			91	120
			244	472	1143	1159			91	83
			198	244	1333	931			91	87
			167	194	1029	469			93	82
			507	167	381	1201			91	97
			507	172	602	1393			97	86
			277	198	65	1016			97	86
			278	245	94	885			89	117
			259	475	629	476			103	110
			257	473	1345	824			96	107
			122	470	170	527			103	102
			236	508	3508	656			96	73
			249	509	797	555			121	102
			249	386	2103	487			89	180
			249	532	423	482				233
			142	335	437	494				77
			510	471	963	430				105
			241	172	1105	304				113
			77	168	1001	293				106
			508	449	793	174				110
			508	440	372	229				117
			508	387	679	227				109
			508	390	1298	227				108
			508	301	1850	229				99
			508		271	168				88
			509		786	168				85
			318		834	87				85
			217		665	351				85
			208		616	478				90
			141		602	550				83
			95		196	423				83
			287		1182	95				78
			285		453	100				82
			193		1179	87				115
			192		483	723				113
			192		1105	723				188
			183		932	842				75
			383		1133	833				179
			219		1145	211				101
			384		429	211				120
			263		372	417				89
			263		837	195				83
			264		786	411				188
			279		331	264				98
			279		428	291				77
			285		411	3215				81
			300		1105	3213				112
			337		423	234				82
			287		963	422				96
			281		629	395				97
			280		1001	231				113
			216		1491	166				82
			280		1345	166				81
			277		793	1764				80
			275		628	4113				81
			276		345	1271				111
			231		290	1746				81
			231		861	4114				81
			231		498	1764				88
			231			1746				83
			231			903				86
			163			903				91
			195			1288				130
			195			1934				100
			183			903				101
			484			1288				96
			331			1934				97
			331			903				104
			470			1277				97
			470			1274				101
			470			1295				106
			470			1782				112
			470			3030				112
			471			992				105
			473			167				105
			450			188				106
			370			167				96
			336			92				108
			287			83				108
			287			188				89
			289			1014				89
			250			92				90
			251			83				87
			251			89				85
			251			500				121
			252			485				132
			252			89				130
			149			3034				129
			471			1782				123
			331			386				126
			331			386				126
			470			1745				131
			470			1746				132
			470			2573				119
			470			2577				80
			470			1526				82
			470			1526				76
			470			296				126
			454			301				126
			397			1830				132
			395			2761				140
			397			1385				140
			209			1385				83
			204			752				83
			287			2042				76
			285			1830				117
			246			235				102
			281			112				104
			197			235				102
			280			112				88
			166			2204				83
			243			2203				87
			283			1068				83
			281			1069				92
			281			305				92
			281			863				99
			281			869				97
			281			949				94
			327			1492				86
			320			949				78
			585			1272				79
			313			1275				77
			313			1492				85
			396			1263				85
			396			617				112
			387			617				102
			389			494				101
			259			1256				99
			480			491				125
			79			6499				125
			78			2421				130
			77			3805				130
			77			3783				97
			77			2454				105
			77			2453				104
			393			6474				104
			326			2389				115
			333			3811				116
			334			1449				82
			318			437				81
			318			738				81
			318			261				81
			318			261				78
			318			1448				90
			325			576				84
			265			1422				83
			135			1071				83
			280			299				82
			277			511
			275			731
			199			956
			199			187
			127			1040
			121			956
			121			187
			121			731
			150			511
			140			365
			142			299
			141			299
			141			396
			142			1234
			122			174
			311			796
			311			1012
			279			1233
			264			1011
			278			367
			278			795
			278			473
			277			251
			278			3663
			509			1246
			407			3008
			331			962
			501			2663
			493			2735
			500			1904
			500			1449
			500			1782
			500			2106
			500			1124
			325			2961
			327			2969
			217			1016
			101			1310
			210			527
			146			2860
			83			2860
			532			3719
			531			2741
			277			3152
			275			3611
			280			335
			226			419
			228			3395
			259			1489
			255			1597
			258			1813
			141			2100
			248			1141
			251			1331
			248			812
			236			749
			122			998
			342			2969
			333			2848
			376			3107
			250			3028
			288			2690
			259			2563
			278			2603
			263			2806
			278			1595
			278			1268
			278			2108
			278			2839
			278			2746
			276			2614
			135			2105
			480			1770
			79			2741
			509			2663
			509			1681
			241			2594
			508			164
			508			1944
			508			1871
			508			1359
			509			2348
			407			320
			318			843
			382			2214
			381			1944
			381			1277
			383			2083
			511			1904
			509			983
			509			1813
			509			1782
			509			995
			509			1670
			509			860
			408			1194
			319			1597
			241			1595
			77			1489
			209			1196
			197			1484
			196			809
			461			1268
			474			1431
			461			1410
			460			1012
			460			1422
			192			767
			191			820
			194			482
			176			794
			374			538
			266			131
			297			659
			264			442
			219			738
			217			290
			280			281
			277			193
			275			638
			276			617
			194			576
			194			437
			197			479
			261			365
			261			1439
			261			870
			261			1382
			277			1733
			128			631
			255			881
			254			403
			237			151
			249			810
			249			2426
			248			1363
			141			2462
			471			1688
			472			467
			370			467
			219			2519
			470			3200
			470			3854
			472			3311
			209			3422
			478			1016
			471			2249
			471			1786
			472			656
			470			1808
			450			818
			231			1633
			470			441
			470			2219
			470			1554
			470			3311
			331			3034
			335			2231
			325			935
			311			2902
			208			1338
			257			1505
			142			1232
			249			1433
			249			3200
			251			2886
			248			2624
			236			2399
			122			2256
			228			598
			228			2414
			280			2519
			277			2403
			275			101
			276			415
			187			467
			507			556
			507			1958
			416			2573
			335			1097
			510			710
			510			400
			509			1071
			509			467
			509			505
			509			646
			510			2848
			241			1433
			153			1232
			208			1400
			508			1338
			508			2345
			508			1918
			508			1310
			508			1484
			509			620
			509			1442
			407			2354
			318			794
			245			2205
			78			611
			489			935
			586			893
			180			1052
			190			2041
			190			1595
			190			1253
			381			674
			251			2902
			293			1310
			372			698
			264			2108
			472			2462
			370			590
			470			794
			470			1121
			472			1115
			159			437
			470			1363
			470			149
			471			2137
			472			2426
			285			377
			337			1314
			280			3797
			280			2249
			281			2205
			301			497
			287			1783
			280			900
			280			1040
			281			1598
			247			1292
			244			545
			243			1127
			243			229
			243			734
			243			499
			243			1199
			236			149
			208			818
			98			810
			152			692
			276			710
			264			499
			275			698
			275			734
			275			680
			275			692
			275			369
			478			101
			471			556
			472			341
			231			1297
			470			1297
			470			336
			470			347
			470			401
			331			460
			208			401
			210			460
			141			347
			89			635
			471			644
			471			1292
			472			828
			471			827
			470			1293
			470			3573
			470			661
			332			669
			428			661
			421			3573
			421			669
			209			792
			781			1439
			427			235
			443			205
			423			294
			219			529
			333			538
			332			294
			332			205
			329			1378
			329			2681
			329			2664
			147			749
			219			2682
			381			511
			381			191
			217			2030
			127			1378
			121			2030
			338			2661
			334			781
			471			511
			472			776
			470			191
			470			741
			470			3984
			471			3982
			231			2733
			472			3708
			470			2732
			470			3708
			470			1705
			471			1713
			385			1449
			386			1878
			276			1869
			257			234
			253			963
			248			1091
			248			1091
			248			963
			247			4755
			122			3262
			208			4753
			218			3246
			218			818
			204			815
			204			139
			517			139
			414			88
			325			85
			509			117
			508			119
			508			861
			508
			508
			242
			77
			389
			389
			259
			509
			241
			77
			508
			508
			508
			508
			508
			406
			318
			781
			473
			472
			231
			470
			470
			470
			331
			331
			313
			531
			95
			83
			89
			488
			473
			472
			465
			471
			472
			371
			160
			103
			265
			281
			280
			144
			140
			140
			245
			245
			334
			334
			471
			470
			470
			470
			470
			231
			509
			509
			508
			508
			508
			235
			502
			407
			326
			285
			285
			184
			183
			179
			532
			285
			281
			281
			282
			282
			282
			199
			199
			252
			252
			252
			330
			472
			370
			467
			470
			470
			471
			464
			159
			168
			168
			444
			440
			440
			398
			397
			260
			330
			242
			235
			230

## Sheet: Figure 2-figure supplement 3C
These data were generated from Supplementary File 2
These data were used in generating Figure 2-figure supplement 3C
CTR = complex tandem repeat genes (ALS gene family, CSA1, EAP1, PGA18, orf19.1725 and PGA55)
Statistics found to the right of the data tables
* p<0.05, **p<0.01, ***p<0.001, ****p<0.0001
	n= 294	n= 294	n= 299	n= 251	n= 184	n= 156	n= 172	n= 172	n= 108	n= 108	n= 368	n= 91	n= 153	n= 147	n= 396	n= 384
	Chr1 CTR Genes	Chr 1 No CTR Genes	Chr2 CTR Genes	Chr2 No CTR Genes	Chr3 CTR Genes	Chr3 No CTR Genes	Chr4 CTR Genes	Chr4 No CTR Genes	Chr5 CTR Genes	Chr5 No CTR Genes	Chr6 CTR Genes	Chr6 No CTR Genes	Chr7 CTR Genes	Chr7 No CTR Genes	ChrR CTR Genes	ChrR No CTR Genes			Null Hypothesis: There is no significant difference in the distribution of percent sequence identity between all long repeats and all long repeats excluding the complex tandem repeat (CTR) genes on each chromosome.
	95.51	95.51	89.33	89.33	92.96	92.96	90.34	90.34	88.5	88.5	87.8	87.8	93.08	88.42	94.21	94.21			Kruskal-Wallis test
	100	100	93.66	93.66	87.99	87.99	89.92	89.92	93.31	93.31	92.96	92.96	96.01	91.08	94.35	94.35			P value	< 0.0001
	98.77	98.77	88.34	88.34	97.82	97.82	89.92	89.92	88.34	88.34	87.99	87.99	95.22	96.33	91.88	91.88			Exact or approximate P value?	Approximate
	93.22	93.22	98.55	98.55	89.72	89.72	98.34	98.34	98.18	98.18	97.82	97.82	96.01	88.84	80.4	80.4			P value summary	****
	92.41	92.41	90.07	90.07	91.46	91.46	98.34	98.34	90.07	90.07	89.72	89.72	95.22	92.83	92.68	92.68			Do the medians vary signif. (P < 0.05)	Yes
	99.74	99.74	95.24	95.24	98.99	98.99	84.66	84.66	92.76	92.76	95.6	95.6	93.08	96.79	88.43	88.43			Number of groups	16
	93.47	93.47	95.67	95.67	97.99	97.99	84.85	84.85	92.78	92.78	91.49	91.49	88.42	89.81	98.34	98.34			Kruskal-Wallis statistic	450.3
	92.66	92.66	85.34	85.34	95.52	95.52	99.17	99.17	88.78	88.78	88.8	88.8	91.08	88.68	91.13	91.13
	99.74	99.74	96.54	96.54	84.33	84.33	95.51	95.51	88.89	88.89	98.34	98.34	96.33	88.68	90.89	90.89			Dunn's multiple comparisons test	Mean rank diff.	Significant?	Summary
	84.99	84.99	95.67	95.67	84.33	84.33	97.59	97.59	85.4	85.4	86.77	86.77	88.84	80.79	91.52	91.52
	93.91	93.91	84.91	84.91	99.17	99.17	100	100	89.79	89.79	86.77	86.77	92.83	83.72	94	94			Chr 1 No CTR Gene vs. Chr1 CTR Gene	0	No	ns
	94.29	94.29	96.54	96.54	82.27	94.53	98.13	98.13	95.54	95.54	81.11	81.11	96.79	99.36	98.77	98.77			Chr 1 No CTR Gene vs. Chr2 CTR Gene	107.7	No	ns
	95.24	95.24	96.12	96.12	87.69	95.9	89.36	89.36	89.79	89.79	94.35	94.35	89.81	94.88	98.8	98.8			Chr 1 No CTR Gene vs. Chr2 No CTR Gene	-86.92	No	ns
	97.78	97.78	96.54	96.54	82.27	94.26	98.13	98.13	95.54	95.54	83.08	83.08	88.68	86.23	100	100			Chr 1 No CTR Gene vs. Chr3 CTR Gene	1.461	No	ns
	96.63	96.63	90.48	90.48	87.29	95.9	94.9	94.9	86.59	86.59	81.11	81.11	88.68	100	83.92	83.92			Chr 1 No CTR Gene vs. Chr3 No CTR Gene	-87.26	No	ns
	96.91	96.91	88.89	88.89	87.29	96	100	100	86.59	86.59	89.89	89.89	80.79	95.96	86.98	86.98			Chr 1 No CTR Gene vs. Chr4 CTR Gene	-218.2	No	ns
	97.67	97.67	89.2	89.2	94.53	93.57	97.53	97.53	86.59	86.59	89.89	89.89	83.72	100	93.11	93.11			Chr 1 No CTR Gene vs. Chr4 No CTR Gene	-218.2	No	ns
	94.44	94.44	88.34	88.34	95.9	99.3	98.46	98.46	86.64	86.64	83.08	83.08	99.36	99.58	93.04	93.04			Chr 1 No CTR Gene vs. Chr5 CTR Gene	-36.43	No	ns
	94.13	94.13	88.34	88.34	94.26	99.29	98.82	98.82	84.48	84.48	90.91	90.91	94.88	85.88	87.5	87.5			Chr 1 No CTR Gene vs. Chr5 No CTR Gene	-36.43	No	ns
	83.09	83.09	90.22	90.22	95.9	99.29	91.86	91.86	93.33	93.33	86.85	86.85	86.23	92.5	92.18	92.18			Chr 1 No CTR Gene vs. Chr6 CTR Gene	1150	Yes	****
	99.36	99.36	89.2	89.2	96	99.3	99.29	99.29	95.92	95.92	86.65	86.65	100	94.68	100	100			Chr 1 No CTR Gene vs. Chr6 No CTR Gene	46.16	No	ns
	85.56	85.56	90.22	90.22	93.57	96.72	94.82	94.82	96.91	96.91	85.14	85.14	95.96	86.3	99.15	99.15			Chr 1 No CTR Gene vs. Chr7 CTR Gene	75.82	No	ns
	99.36	99.36	89.89	89.89	99.3	91.14	99.2	99.2	97.06	97.06	100	100	100	99.58	93.42	93.42			Chr 1 No CTR Gene vs. Chr7 No CTR Gene	86.08	No	ns
	99.36	99.36	91.79	91.79	99.29	91.08	94.35	94.35	88.99	88.99	99.01	99.01	99.58	99.36	99.15	99.15			Chr 1 No CTR Gene vs. ChrR CTR Gene	-13.61	No	ns
	95.32	95.32	87.69	87.69	99.29	98.39	87.34	87.34	95.74	95.74	100	100	85.88	100	92.98	92.98			Chr 1 No CTR Gene vs. ChrR No CTR Gene	-66.52	No	ns
	98.94	98.94	92.79	92.79	99.3	98.07	94.26	94.26	97.35	97.35	99.01	99.01	92.5	100	100	100			Chr1 CTR Gene vs. Chr2 CTR Gene	107.7	No	ns
	85.31	85.31	87.35	87.35	96.72	100	95.04	95.04	94.64	94.64	85.14	85.14	94.68	95.97	85.11	85.11			Chr1 CTR Gene vs. Chr2 No CTR Gene	-86.92	No	ns
	93.57	93.57	85.41	85.41	91.14	97.7	92.11	92.11	97.14	97.14	87.45	87.45	86.3	83.91	96.54	96.54			Chr1 CTR Gene vs. Chr3 CTR Gene	1.461	No	ns
	92.8	92.8	81.63	81.63	91.08	98.8	97.65	97.65	91.82	91.82	86.65	86.65	99.58	85.88	92.87	92.87			Chr1 CTR Gene vs. Chr3 No CTR Gene	-87.26	No	ns
	95.16	95.16	96.6	96.6	98.39	100	95.56	95.56	95.74	95.74	87.45	87.45	99.36	96.5	99.15	99.15			Chr1 CTR Gene vs. Chr4 CTR Gene	-218.2	No	ns
	94.35	94.35	97.46	97.46	98.07	95.88	96.39	96.39	95.61	95.61	93.76	93.76	100	99.65	87.47	87.47			Chr1 CTR Gene vs. Chr4 No CTR Gene	-218.2	No	ns
	95.18	95.18	97.97	97.97	100	97.67	98.97	98.97	94.53	94.53	93.13	93.13	100	99.41	93.05	93.05			Chr1 CTR Gene vs. Chr5 CTR Gene	-36.43	No	ns
	93.95	93.95	90.91	90.91	97.7	97.67	96.91	96.91	98.82	98.82	98.04	98.04	95.97	98.21	86.71	86.71			Chr1 CTR Gene vs. Chr5 No CTR Gene	-36.43	No	ns
	95.16	95.16	97.67	97.67	98.8	92.59	97.96	97.96	92.52	92.52	90.41	90.41	83.91	96.09	100	100			Chr1 CTR Gene vs. Chr6 CTR Gene	1150	Yes	****
	92.35	92.35	98.44	98.44	100	83	100	100	87.82	87.82	98.43	98.43	85.88	95.74	99.15	99.15			Chr1 CTR Gene vs. Chr6 No CTR Gene	46.16	No	ns
	99.69	99.69	97.71	97.71	95.88	95.73	96.81	96.81	95.18	95.18	98.43	98.43	96.5	99.85	93.42	93.42			Chr1 CTR Gene vs. Chr7 CTR Gene	75.82	No	ns
	98.39	98.39	97.14	97.14	97.67	89.34	90.64	90.64	100	100	98.04	98.04	99.65	97.01	92.16	92.16			Chr1 CTR Gene vs. Chr7 No CTR Gene	86.08	No	ns
	98.53	98.53	89.08	89.08	97.67	94.64	87.72	87.72	100	100	97.84	97.84	99.41	99.65	92.98	92.98			Chr1 CTR Gene vs. ChrR CTR Gene	-13.61	No	ns
	99.49	99.49	89.89	89.89	92.59	96.3	84.66	84.66	95.22	95.22	98.04	98.04	98.21	98.95	100	100			Chr1 CTR Gene vs. ChrR No CTR Gene	-66.52	No	ns
	97.97	97.97	91.24	91.24	83	95.41	96.33	96.33	99.29	99.29	98.04	98.04	96.09	98.21	85.11	85.11			Chr2 CTR Gene vs. Chr2 No CTR Gene	-194.6	No	ns
	97.45	97.45	87.41	87.41	95.73	97.06	90.84	90.84	95.55	95.55	88.89	88.89	95.74	96.09	96.54	96.54			Chr2 CTR Gene vs. Chr3 CTR Gene	-106.3	No	ns
	98.97	98.97	87.63	87.63	89.34	97.49	95.19	95.19	95.97	95.97	100	100	99.85	95.74	82.22	82.22			Chr2 CTR Gene vs. Chr3 No CTR Gene	-195	No	ns
	98.97	98.97	87.63	87.63	94.64	89.55	96.53	96.53	94.88	94.88	96.81	96.81	97.01	89.07	88.98	88.98			Chr2 CTR Gene vs. Chr4 CTR Gene	-325.9	No	ns
	98.82	98.82	95	95	96.3	90.07	91.54	91.54	94.52	94.52	92.16	92.16	99.65	89.75	99.21	99.21			Chr2 CTR Gene vs. Chr4 No CTR Gene	-325.9	No	ns
	97.67	97.67	94.9	94.9	95.41	90.07	97.49	97.49	95.96	95.96	92.79	92.79	98.95	89.71	98.41	98.41			Chr2 CTR Gene vs. Chr5 CTR Gene	-144.1	No	ns
	98.86	98.86	100	100	97.06	89.72	87.69	87.69	95.32	95.32	92.13	92.13	98.21	89.71	98.48	98.48			Chr2 CTR Gene vs. Chr5 No CTR Gene	-144.1	No	ns
	96.47	96.47	100	100	97.49	89.01	88.34	88.34	95.97	95.97	87.16	87.16	96.09	89.71	97.14	97.14			Chr2 CTR Gene vs. Chr6 CTR Gene	1043	Yes	****
	97.65	97.65	100	100	89.55	89.72	87.99	87.99	92.82	92.82	92.91	92.91	95.74	88.89	97.56	97.56			Chr2 CTR Gene vs. Chr6 No CTR Gene	-61.55	No	ns
	94.88	94.88	83.71	83.71	90.07	97.47	87.28	87.28	99.32	99.32	93.86	93.86	89.07	89.3	96.6	96.6			Chr2 CTR Gene vs. Chr7 CTR Gene	-31.89	No	ns
	94.88	94.88	83.5	83.5	90.07	92.53	88.34	88.34	99.32	99.32	96.35	96.35	89.75	89.41	99.11	99.11			Chr2 CTR Gene vs. Chr7 No CTR Gene	-21.63	No	ns
	94.35	94.35	87.11	87.11	89.72	87.11	87.99	87.99	92.54	92.54	85.49	85.49	89.71	92.79	89.81	89.81			Chr2 CTR Gene vs. ChrR CTR Gene	-121.3	No	ns
	94.88	94.88	86.85	86.85	89.01	100	90	90	95.73	95.73	87.16	87.16	89.71	93.07	90.7	90.7			Chr2 CTR Gene vs. ChrR No CTR Gene	-174.2	No	ns
	94.13	94.13	88.89	88.89	89.72	98.04	97.84	97.84	93.53	93.53	92.13	92.13	89.71	92.16	91.21	91.21			Chr2 No CTR Gene vs. Chr3 CTR Gene	88.38	No	ns
	94.68	94.68	80.79	80.79	97.47	98.33	92.59	92.59	99.15	99.15	85.41	85.41	88.89	92.5	91.49	91.49			Chr2 No CTR Gene vs. Chr3 No CTR Gene	-0.3385	No	ns
	95.48	95.48	95.45	95.45	92.53	92.27	97.28	97.28	92.58	92.58	93.86	93.86	89.3	97.28	91.75	91.75			Chr2 No CTR Gene vs. Chr4 CTR Gene	-131.2	No	ns
	98.23	98.23	100	100	87.11	98.95	89.86	89.86	99.15	99.15	92.91	92.91	89.41	98.11	91.46	91.46			Chr2 No CTR Gene vs. Chr4 No CTR Gene	-131.2	No	ns
	98.49	98.49	100	100	100	100	97.28	97.28	87.47	87.47	83	83	92.79	98.55	84.48	84.48			Chr2 No CTR Gene vs. Chr5 CTR Gene	50.49	No	ns
	98.46	98.46	100	100	98.04	99.53	93.33	93.33	84.89	84.89	88.84	99.61	93.07	98.18	89.81	89.81			Chr2 No CTR Gene vs. Chr5 No CTR Gene	50.49	No	ns
	91.21	91.21	98.39	98.39	98.33	99.53	97.67	97.67	95.67	95.67	84.34	99.61	92.16	97.82	99.11	99.11			Chr2 No CTR Gene vs. Chr6 CTR Gene	1237	Yes	****
	86.59	86.59	88.89	88.89	92.27	94.11	99.23	99.23	99.57	99.57	89.47	99.61	92.5	97.82	96.6	96.6			Chr2 No CTR Gene vs. Chr6 No CTR Gene	133.1	No	ns
	91.46	91.46	98.43	98.43	98.95	99.13	100	100	99.15	99.15	82.46	99.41	97.28	97.09	97.56	97.56			Chr2 No CTR Gene vs. Chr7 CTR Gene	162.7	No	ns
	92.5	92.5	96.19	96.19	100	92.16	99.61	99.61	93.42	93.42	86.97	91.16	98.11	96.11	98.57	98.57			Chr2 No CTR Gene vs. Chr7 No CTR Gene	173	No	ns
	92.5	92.5	89.17	89.17	99.53	93.33	99.41	99.41	92.98	92.98	85.29	99.61	98.55	95.76	93.76	93.76			Chr2 No CTR Gene vs. ChrR CTR Gene	73.31	No	ns
	91.46	91.46	89.17	89.17	99.53	97.35	89.71	89.71	87.01	87.01	91.39	99.02	98.18	96.11	88.26	88.26			Chr2 No CTR Gene vs. ChrR No CTR Gene	20.4	No	ns
	83.92	83.92	82.22	82.22	89.32	95.41	99.61	99.61	93.13	93.13	86.97	98.04	97.82	96.11	86.89	86.89			Chr3 CTR Gene vs. Chr3 No CTR Gene	-88.72	No	ns
	100	100	96.19	96.19	86.97	97.17	99.41	99.41	91.88	91.88	84.73	94.13	97.82	95.41	81.14	81.14			Chr3 CTR Gene vs. Chr4 CTR Gene	-219.6	No	ns
	100	100	98.43	98.43	86.97	94.55	98.43	98.43	99.69	99.69	91.52	94.65	97.09	88.49	88.26	88.26			Chr3 CTR Gene vs. Chr4 No CTR Gene	-219.6	No	ns
	100	100	98.61	98.61	89.32	92.79	91.55	91.55	98.07	98.07	83.52	89.07	96.11	82.61	85.16	85.16			Chr3 CTR Gene vs. Chr5 CTR Gene	-37.89	No	ns
	98.72	98.72	99.15	99.15	93.37	83.98	99.61	99.61	92.54	92.54	88.84	100	95.76	81.61	84.29	84.29			Chr3 CTR Gene vs. Chr5 No CTR Gene	-37.89	No	ns
	95.45	95.45	87.01	87.01	93.37	94.91	94.62	94.62	92.5	92.5	88.39	98.73	96.11	82.61	85.8	85.8			Chr3 CTR Gene vs. Chr6 CTR Gene	1149	Yes	****
	92.41	92.41	86.71	86.71	94.11	99.13	95.28	95.28	86.94	86.94	82.11	98.73	96.11	84.99	100	100			Chr3 CTR Gene vs. Chr6 No CTR Gene	44.7	No	ns
	92.66	92.66	93.05	93.05	99.13	94.11	95.74	95.74	90.86	90.86	84.43	98.77	95.41	93.53	98.8	98.8			Chr3 CTR Gene vs. Chr7 CTR Gene	74.36	No	ns
	94.4	94.4	100	100	92.16	94.91	99.22	99.22	93.85	93.85	82.5	100	88.49	93.43	98.82	98.82			Chr3 CTR Gene vs. Chr7 No CTR Gene	84.62	No	ns
	95	95	100	100	93.33	89.31	94.06	94.06	95.92	95.92	81.71	96.11	82.61	87.74	100	100			Chr3 CTR Gene vs. ChrR CTR Gene	-15.07	No	ns
	100	100	99.15	99.15	97.35	90.96	99.74	99.74	97.17	97.17	80.23	98.63	81.61	85.34	81.28	81.28			Chr3 CTR Gene vs. ChrR No CTR Gene	-67.98	No	ns
	100	100	92.99	92.99	95.41	90.73	100	100	92.08	92.08	80.91	98.73	82.61	99.15	93.76	93.76			Chr3 No CTR Gene vs. Chr4 CTR Gene	-130.9	No	ns
	100	100	92.14	92.14	97.17	91.87	94.06	94.06	96.3	96.3	88	98.73	84.99	93.84	91.86	91.86			Chr3 No CTR Gene vs. Chr4 No CTR Gene	-130.9	No	ns
	86.67	86.67	93.43	93.43	94.55	91.59	99.74	99.74	94.55	94.55	88.65	100	93.53	93.42	92.52	92.52			Chr3 No CTR Gene vs. Chr5 CTR Gene	50.82	No	ns
	84.87	84.87	93.02	93.02	92.79	90.41	99.22	99.22	95.61	95.61	89.34	96.11	93.43	93.42	93.95	93.95			Chr3 No CTR Gene vs. Chr5 No CTR Gene	50.82	No	ns
	97.64	97.64	85.11	85.11	83.98	91.24	100	100	99.53	99.53	87.04	91.24	87.74	98.72	92.37	92.37			Chr3 No CTR Gene vs. Chr6 CTR Gene	1237	Yes	****
	100	100	96.54	96.54	94.91	91.55	95.74	95.74	94.71	94.71	89.84	95.38	85.34	86.71	92.37	92.37			Chr3 No CTR Gene vs. Chr6 No CTR Gene	133.4	No	ns
	99.21	99.21	85.71	85.71	99.13	91.36	88.45	88.45	99.53	99.53	82.25	91.79	99.15	92.84	91.24	91.24			Chr3 No CTR Gene vs. Chr7 CTR Gene	163.1	No	ns
	98.44	98.44	94.96	94.96	94.11	91.18	89.71	89.71	90.26	90.26	81.31	92.68	93.84	85.4	96.72	96.72			Chr3 No CTR Gene vs. Chr7 No CTR Gene	173.3	No	ns
	92.61	92.61	96.53	96.53	94.91	91.16	82.57	82.57	87.07	87.07	87.04	91.49	93.42	88.49	94.71	94.71			Chr3 No CTR Gene vs. ChrR CTR Gene	73.64	No	ns
	97.64	97.64	92.83	92.83	89.31	91.16	88.42	88.42	83.11	83.11	89.84	82.62	93.42	100	93.61	93.61			Chr3 No CTR Gene vs. ChrR No CTR Gene	20.74	No	ns
	88.24	88.24	93.6	93.6	90.96	90.98	85.41	85.41	86.48	86.48	89.34	82.62	98.72	98.57	94.06	94.06			Chr4 CTR Gene vs. Chr4 No CTR Gene	0	No	ns
	84.85	84.85	83.71	83.71	90.73	89.34	82.57	82.57	88.45	88.45	88.65	87.8	86.71	97.87	94.06	94.06			Chr4 CTR Gene vs. Chr5 CTR Gene	181.7	No	ns
	82.59	82.59	90.31	90.31	91.87	88.99	91.23	91.23	97.75	97.75	82.56	90.71	92.84	96.63	94.06	94.06			Chr4 CTR Gene vs. Chr5 No CTR Gene	181.7	No	ns
	97.64	97.64	83.5	83.5	91.59	91.82	94.25	94.25	96.63	96.63	88	94.24	85.4	96.28	85.8	85.8			Chr4 CTR Gene vs. Chr6 CTR Gene	1368	Yes	****
	82.59	82.59	90.31	90.31	90.41	92.79	97.56	97.56	96.67	96.67	86.62	93.75	88.49	90.83	86.89	86.89			Chr4 CTR Gene vs. Chr6 No CTR Gene	264.3	No	ns
	90.96	90.96	98.72	98.72	91.24	92.08	100	100	97.73	97.73	88.89	92.78	100	92.58	80.34	80.34			Chr4 CTR Gene vs. Chr7 CTR Gene	294	No	ns
	89.31	89.31	97.77	97.77	91.55	97.73	100	100	97.65	97.65	88.74		98.57	92.16	82.76	82.76			Chr4 CTR Gene vs. Chr7 No CTR Gene	304.2	No	ns
	97.58	97.58	98.33	98.33	91.36	96.47	98.75	98.75	84.94	84.94	88.51		97.87	92.18	85.16	85.16			Chr4 CTR Gene vs. ChrR CTR Gene	204.5	No	ns
	96.5	96.5	99.44	99.44	91.18	96.47	97.7	97.7	100	100	87.81		96.63	98.73	91.18	91.18			Chr4 CTR Gene vs. ChrR No CTR Gene	151.6	No	ns
	89.64	89.64	98.06	98.06	91.16	96.47	97.59	97.59	99.3	99.3	88.14		96.28	92.99	91.18	91.18			Chr4 No CTR Gene vs. Chr5 CTR Gene	181.7	No	ns
	89.78	89.78	92.27	92.27	91.16	94.44	93.75	93.75	95.24	95.24	88.74		90.83	92.14	92.61	92.61			Chr4 No CTR Gene vs. Chr5 No CTR Gene	181.7	No	ns
	80.54	80.54	96.28	96.28	90.98	82.5	98.77	98.77	92.37	92.37	88.14		92.58	86.84	92.61	92.61			Chr4 No CTR Gene vs. Chr6 CTR Gene	1368	Yes	****
	81.63	81.63	100	100	89.34	83.06	95.04	95.04	100	100	88.01		92.16	98.72	91.5	91.5			Chr4 No CTR Gene vs. Chr6 No CTR Gene	264.3	No	ns
	89.42	89.42	99.44	99.44	88.99	98.48	97.67	97.67	99.2	99.2	87.81		92.18	86.14	90.73	90.73			Chr4 No CTR Gene vs. Chr7 CTR Gene	294	No	ns
	90.34	90.34	97.03	97.03	91.82	92.16	95.56	95.56	95.16	95.16	88.16		98.73	92.47	93.51	93.51			Chr4 No CTR Gene vs. Chr7 No CTR Gene	304.2	No	ns
	90.64	90.64	92.79	92.79	92.79	92.39	98.78	98.78	87.76	87.76	87.25		92.99	92.99	93.85	93.85			Chr4 No CTR Gene vs. ChrR CTR Gene	204.5	No	ns
	85.29	85.29	92.62	92.62	92.08	92.41	97.56	97.56	95.9	95.9	99.61		92.14	90.83	98.04	98.04			Chr4 No CTR Gene vs. ChrR No CTR Gene	151.6	No	ns
	92.44	92.44	86.42	86.42	97.73	83.06	98.77	98.77	92.44	92.44	99.61		86.84	89.97	99.41	99.41			Chr5 CTR Gene vs. Chr5 No CTR Gene	0	No	ns
	89.87	89.87	88.55	88.55	96.47	92.39	96.67	96.67	96.05	96.05	99.61		98.72	84.51	99.41	99.41			Chr5 CTR Gene vs. Chr6 CTR Gene	1187	Yes	****
	90.64	90.64	88.55	88.55	96.47	92.41	97.67	97.67	89.4	89.4	99.41		86.14	83.72	99.41	99.41			Chr5 CTR Gene vs. Chr6 No CTR Gene	82.59	No	ns
	93.75	93.75	83.98	83.98	96.47	82.5	97.65	97.65	89.4	89.4	91.16		92.47	83.09	99.41	99.41			Chr5 CTR Gene vs. Chr7 CTR Gene	112.3	No	ns
	94.21	94.21	89.42	89.42	94.44	90.36	98.8	98.8	89.87	89.87	99.61		92.99	83.48	98.82	98.82			Chr5 CTR Gene vs. Chr7 No CTR Gene	122.5	No	ns
	97.15	97.15	92.8	92.8	82.5	94.8	97.7	97.7	96.05	96.05	99.02		90.83	83.91	99.41	99.41			Chr5 CTR Gene vs. ChrR CTR Gene	22.82	No	ns
	88.5	88.5	95.22	95.22	83.06	90.64	81.61	81.61			98.04		89.97	83.91	89.75	89.75			Chr5 CTR Gene vs. ChrR No CTR Gene	-30.08	No	ns
	89.38	89.38	94.82	94.82	98.48	94.9	99.81	99.81			94.13		84.51	89.88	100	100			Chr5 No CTR Gene vs. Chr6 CTR Gene	1187	Yes	****
	89.33	89.33	91.24	91.24	92.16	94.35	99.81	99.81			94.65		83.72	83.64	83.69	83.69			Chr5 No CTR Gene vs. Chr6 No CTR Gene	82.59	No	ns
	87.79	87.79	95.24	95.24	92.39	94.4	99.89	99.89			89.07		83.09	92.82	82.76	82.76			Chr5 No CTR Gene vs. Chr7 CTR Gene	112.3	No	ns
	82.99	82.99	95.24	95.24	92.41	100	94.19	94.19			100		83.48	96.28	84.29	84.29			Chr5 No CTR Gene vs. Chr7 No CTR Gene	122.5	No	ns
	82.99	82.99	96	96	83.06	100	94.25	94.25			89.28		83.91	92.99	81.14	81.14			Chr5 No CTR Gene vs. ChrR CTR Gene	22.82	No	ns
	96.47	96.47	83.98	83.98	92.39	98.8	91.58	91.58			81.07		83.91	99.36	99.52	99.52			Chr5 No CTR Gene vs. ChrR No CTR Gene	-30.08	No	ns
	98.21	98.21	99.15	99.15	92.41	97.59	89.55	89.55			83.58		89.88	100	99.52	99.52			Chr6 CTR Gene vs. Chr6 No CTR Gene	-1104	Yes	****
	98.21	98.21	87.5	87.5	82.5	98.8	97.03	97.03			84.04		83.64	97.62	97.7	97.7			Chr6 CTR Gene vs. Chr7 CTR Gene	-1074	Yes	****
	95.79	95.79	86.71	86.71	90.36	100	93.14	93.14			81.59		92.82	97.71	98.41	98.41			Chr6 CTR Gene vs. Chr7 No CTR Gene	-1064	Yes	****
	97.5	97.5	93.05	93.05	94.8	97.59	95.88	95.88			86.12		96.28	98.48	97.7	97.7			Chr6 CTR Gene vs. ChrR CTR Gene	-1164	Yes	****
	91.07	91.07	99.57	99.57	90.64	83.98	99.23	99.23			81.58		92.99	94.34	98.41	98.41			Chr6 CTR Gene vs. ChrR No CTR Gene	-1217	Yes	****
	93.33	93.33	99.15	99.15	94.9	97.7	99.61	99.61			82.77		99.36	95.48	91.46	91.46			Chr6 No CTR Gene vs. Chr7 CTR Gene	29.66	No	ns
	95.24	95.24	99.15	99.15	94.35	93.07	99.61	99.61			80.62		100	85.56	98.71	98.71			Chr6 No CTR Gene vs. Chr7 No CTR Gene	39.92	No	ns
	82.05	82.05	93.84	93.84	94.4	98.57	99.61	99.61			82.12		97.62	86.23	98.46	98.46			Chr6 No CTR Gene vs. ChrR CTR Gene	-59.77	No	ns
	84.87	84.87	93.84	93.84	100	96.58	99.41	99.41			82.67		97.71	85.48	98.97	98.97			Chr6 No CTR Gene vs. ChrR No CTR Gene	-112.7	No	ns
	86.67	86.67	92.99	92.99	100	97.59	99.02	99.02			80.99		98.48	86.3	86.59	86.59			Chr7 CTR Gene vs. Chr7 No CTR Gene	10.26	No	ns
	82.05	82.05	92.98	92.98	98.8	81.57	98.43	98.43			81.84		94.34	94.52	90.84	90.84			Chr7 CTR Gene vs. ChrR CTR Gene	-89.44	No	ns
	97.65	97.65	84.8	84.8	97.59	81.57	91.18	91.18			81.73		95.48	86.3	90.84	90.84			Chr7 CTR Gene vs. ChrR No CTR Gene	-142.3	No	ns
	98.8	98.8	96.12	96.12	98.8	93.85	94.38	94.38			80.47		85.56	89.88	98.19	98.19			Chr7 No CTR Gene vs. ChrR CTR Gene	-99.7	No	ns
	100	100	98.8	98.8	100	89.08	94.67	94.67			83.49		86.23	93.64	98.04	98.04			Chr7 No CTR Gene vs. ChrR No CTR Gene	-152.6	No	ns
	84.41	84.41	98.78	98.78	97.59	99.83	89.71	89.71			82.3		85.48	93.13	89.3	89.3			ChrR CTR Gene vs. ChrR No CTR Gene	-52.9	No	ns
	84.41	84.41	97.62	97.62	83.98	99.7	100	100			81.95		86.3	92.84	100	100
	91.87	91.87	92.11	92.11	97.7	99.7	97.61	97.61			84.08		94.52	93.11	99.61	99.61
	94.62	94.62	93.75	93.75	93.07	99.83	97.46	97.46			82.24		86.3	92.05	99.61	99.61			Test details	Mean rank 1	Mean rank 2	Mean rank diff.	n1	n2
	94.38	94.38	93.47	93.47	98.57	95.73	99.49	99.49			83.06		89.88	92.81	99.61	99.61
	93.76	93.76	95.45	95.45	96.58	86.94	98.25	98.25			81.16		93.64	92.47	99.61	99.61			Chr 1 No CTR Gene vs. Chr1 CTR Gene	1883	1883	0	294	294
	94.13	94.13	93.22	93.22	97.59	98.25	87.5	87.5			89.85		93.13	93.05	91.16	91.16			Chr 1 No CTR Gene vs. Chr2 CTR Gene	1883	1775	107.7	294	299
	93.51	93.51	89.36	89.36	81.57	92.59	85.59	85.59			89.74		92.84	93.05	99.41	99.41			Chr 1 No CTR Gene vs. Chr2 No CTR Gene	1883	1970	-86.92	294	251
	94.38	94.38	94.9	94.9	81.57	83.69	87.01	87.01			83.14		93.11	92.15	99.02	99.02			Chr 1 No CTR Gene vs. Chr3 CTR Gene	1883	1881	1.461	294	184
	94.38	94.38	98.73	98.73	93.85	89.64	87.5	87.5			83.12		92.05	93.05	94.36	94.36			Chr 1 No CTR Gene vs. Chr3 No CTR Gene	1883	1970	-87.26	294	156
	94.36	94.36	100	100	89.08	90.27	87.47	87.47			82.04		92.81	95.27	94.97	94.97			Chr 1 No CTR Gene vs. Chr4 CTR Gene	1883	2101	-218.2	294	172
	92.7	92.7	97.53	97.53	99.83	98.12	87.47	87.47			82.69		92.47	97.28	95.73	95.73			Chr 1 No CTR Gene vs. Chr4 No CTR Gene	1883	2101	-218.2	294	172
	87.35	87.35	97.65	97.65	99.7	99.25	88.89	88.89			81.54		93.05	94.06	99.36	99.36			Chr 1 No CTR Gene vs. Chr5 CTR Gene	1883	1919	-36.43	294	108
	92.62	92.62	100	100	91.39	91.89	80.82	80.82			80.89		93.05	99.74	88.64	88.64			Chr 1 No CTR Gene vs. Chr5 No CTR Gene	1883	1919	-36.43	294	108
	93.66	93.66	95.51	95.51	96.98	90.27	93.81	93.81			82.73		92.15	99.74	87.07	87.07			Chr 1 No CTR Gene vs. Chr6 CTR Gene	1883	732.4	1150	294	368
	93.31	93.31	91.23	91.23	96.41	89.04	94.24	94.24			81.3		93.05	89.38	98.19	98.19			Chr 1 No CTR Gene vs. Chr6 No CTR Gene	1883	1836	46.16	294	91
	92.96	92.96	91.58	91.58	86.7	98.95	88.89	88.89			85.45		95.27	93.75	88.24	88.24			Chr 1 No CTR Gene vs. Chr7 CTR Gene	1883	1807	75.82	294	153
	92.96	92.96	94.19	94.19	96.41	96.28	90.5	90.5			83.57		97.28	98.61	91.52	91.52			Chr 1 No CTR Gene vs. Chr7 No CTR Gene	1883	1797	86.08	294	147
	92.25	92.25	89.55	89.55	92.39	100	80.16	80.16			81.84		94.06		94	94			Chr 1 No CTR Gene vs. ChrR CTR Gene	1883	1896	-13.61	294	396
	92.53	92.53	98.02	98.02	95.18	97.77	80.16	80.16			82.2		99.74		91.67	91.67			Chr 1 No CTR Gene vs. ChrR No CTR Gene	1883	1949	-66.52	294	384
	90	90	96.04	96.04	86.7	97.03	99.34	99.34			86.39		99.74		91.67	91.67			Chr1 CTR Gene vs. Chr2 CTR Gene	1883	1775	107.7	294	299
	90.04	90.04	95.88	95.88	85.29	92.56	99.61	99.61			80.24		89.38		84.66	84.66			Chr1 CTR Gene vs. Chr2 No CTR Gene	1883	1970	-86.92	294	251
	92.5	92.5	98.99	98.99	96.84	87.28	95.73	95.73			81		93.75		89.36	89.36			Chr1 CTR Gene vs. Chr3 CTR Gene	1883	1881	1.461	294	184
	93.23	93.23	100	100	92.39	89.01	92.5	92.5			83.08		98.61		93.33	93.33			Chr1 CTR Gene vs. Chr3 No CTR Gene	1883	1970	-87.26	294	156
	95.27	95.27	100	100	95.18	97.09	80.82	80.82			82.13				94.29	94.29			Chr1 CTR Gene vs. Chr4 CTR Gene	1883	2101	-218.2	294	172
	89.64	89.64	81.28	81.28	84.73	92.25	96.79	96.79			80.57				94.17	94.17			Chr1 CTR Gene vs. Chr4 No CTR Gene	1883	2101	-218.2	294	172
	91.16	91.16	100	100	97.75	90.64	95.19	95.19			84.03				89.36	89.36			Chr1 CTR Gene vs. Chr5 CTR Gene	1883	1919	-36.43	294	108
	83.71	83.71	97.61	97.61	92.6		90.64	90.64			84.02				95.45	95.45			Chr1 CTR Gene vs. Chr5 No CTR Gene	1883	1919	-36.43	294	108
	88	88	98.53	98.53	92.6		93.6	93.6			83.7				97.59	97.59			Chr1 CTR Gene vs. Chr6 CTR Gene	1883	732.4	1150	294	368
	92.76	92.76	96.6	96.6	97.75		88.68	88.68			81.05				97.7	97.7			Chr1 CTR Gene vs. Chr6 No CTR Gene	1883	1836	46.16	294	91
	95.6	95.6	93.97	93.97	99.7		97.67	97.67			81.66				98.82	98.82			Chr1 CTR Gene vs. Chr7 CTR Gene	1883	1807	75.82	294	153
	92.05	92.05	98.02	98.02	99.83		97.96	97.96			82.7				97.59	97.59			Chr1 CTR Gene vs. Chr7 No CTR Gene	1883	1797	86.08	294	147
	96.15	96.15	95.88	95.88	95.73		98.97	98.97			80.44				100	100			Chr1 CTR Gene vs. ChrR CTR Gene	1883	1896	-13.61	294	396
	91.46	91.46	97.94	97.94	86.94		84.66	84.66			81.32				100	100			Chr1 CTR Gene vs. ChrR No CTR Gene	1883	1949	-66.52	294	384
	92.56	92.56	86.42	86.42	98.25		99.89	99.89			82.24				100	100			Chr2 CTR Gene vs. Chr2 No CTR Gene	1775	1970	-194.6	299	251
	95.24	95.24	92.81	92.81	92.59		100	100			81.59				100	100			Chr2 CTR Gene vs. Chr3 CTR Gene	1775	1881	-106.3	299	184
	95.52	95.52	89.2	89.2	83.69		100	100			82.84				100	100			Chr2 CTR Gene vs. Chr3 No CTR Gene	1775	1970	-195	299	156
	86.71	86.71	88.81	88.81	89.64		91.1	91.1			81.46				100	100			Chr2 CTR Gene vs. Chr4 CTR Gene	1775	2101	-325.9	299	172
	86.71	86.71	91.16	91.16	90.27		90.21	90.21			91.46				84.51	84.51			Chr2 CTR Gene vs. Chr4 No CTR Gene	1775	2101	-325.9	299	172
	87.01	87.01	97.87	97.87	98.12		89.69	89.69			83.68				89.97	89.97			Chr2 CTR Gene vs. Chr5 CTR Gene	1775	1919	-144.1	299	108
	86.71	86.71	91.18	91.18	99.25		89.91	89.91			84.04				93.26	93.26			Chr2 CTR Gene vs. Chr5 No CTR Gene	1775	1919	-144.1	299	108
	86.14	86.14	98.58	98.58	91.89		93.84	93.84			80.29				93.26	93.26			Chr2 CTR Gene vs. Chr6 CTR Gene	1775	732.4	1043	299	368
	92.15	92.15	94.05	94.05	90.27		85.29	85.29			83.36				97.58	97.58			Chr2 CTR Gene vs. Chr6 No CTR Gene	1775	1836	-61.55	299	91
	86.53	86.53	93.06	93.06	89.04						82.81				96.5	96.5			Chr2 CTR Gene vs. Chr7 CTR Gene	1775	1807	-31.89	299	153
	84.24	84.24	89.71	89.71	98.95						85.29				90.27	90.27			Chr2 CTR Gene vs. Chr7 No CTR Gene	1775	1797	-21.63	299	147
	86.71	86.71	86.48	86.48	96.28						82.27				98.99	98.99			Chr2 CTR Gene vs. ChrR CTR Gene	1775	1896	-121.3	299	396
	85.59	85.59	96.47	96.47	100						83.68				96.91	96.91			Chr2 CTR Gene vs. ChrR No CTR Gene	1775	1949	-174.2	299	384
	86.98	86.98	96.09	96.09	97.77						80				100	100			Chr2 No CTR Gene vs. Chr3 CTR Gene	1970	1881	88.38	251	184
	94.34	94.34	96.09	96.09	97.03						80.42				100	100			Chr2 No CTR Gene vs. Chr3 No CTR Gene	1970	1970	-0.3385	251	156
	92.61	92.61	96.09	96.09	92.56						81.58				93.02	93.02			Chr2 No CTR Gene vs. Chr4 CTR Gene	1970	2101	-131.2	251	172
	97.67	97.67	95.73	95.73	87.28						80.43				87.74	87.74			Chr2 No CTR Gene vs. Chr4 No CTR Gene	1970	2101	-131.2	251	172
	98.41	98.41	95.37	95.37	89.01						82.69				88.45	88.45			Chr2 No CTR Gene vs. Chr5 CTR Gene	1970	1919	50.49	251	108
	97.62	97.62	94.8	94.8	97.09						80.62				95.67	95.67			Chr2 No CTR Gene vs. Chr5 No CTR Gene	1970	1919	50.49	251	108
	97.64	97.64	87.72	87.72	92.25						86.65				92.98	92.98			Chr2 No CTR Gene vs. Chr6 CTR Gene	1970	732.4	1237	251	368
	89.86	89.86	100	100	90.64						82.29				92.98	92.98			Chr2 No CTR Gene vs. Chr6 No CTR Gene	1970	1836	133.1	251	91
	98.57	98.57	92.38	92.38							85.35				86.84	86.84			Chr2 No CTR Gene vs. Chr7 CTR Gene	1970	1807	162.7	251	153
	99.02	99.02	97.03	97.03							86.69				92.98	92.98			Chr2 No CTR Gene vs. Chr7 No CTR Gene	1970	1797	173	251	147
	99.02	99.02	95.88	95.88							82.04				92.98	92.98			Chr2 No CTR Gene vs. ChrR CTR Gene	1970	1896	73.31	251	396
	85.88	85.88	97.94	97.94							84.03				87.26	87.26			Chr2 No CTR Gene vs. ChrR No CTR Gene	1970	1949	20.4	251	384
	86.44	86.44	97.78	97.78							83.12				92.15	92.15			Chr3 CTR Gene vs. Chr3 No CTR Gene	1881	1970	-88.72	184	156
	85.88	85.88	98.88	98.88							81.48				92.15	92.15			Chr3 CTR Gene vs. Chr4 CTR Gene	1881	2101	-219.6	184	172
	85.31	85.31	97.75	97.75							82.74				88.98	88.98			Chr3 CTR Gene vs. Chr4 No CTR Gene	1881	2101	-219.6	184	172
	85.88	85.88	98.82	98.82							81.21				80.23	97.81			Chr3 CTR Gene vs. Chr5 CTR Gene	1881	1919	-37.89	184	108
	83.64	83.64	96.47	96.47							84.02				84.43	97.73			Chr3 CTR Gene vs. Chr5 No CTR Gene	1881	1919	-37.89	184	108
	92.5	92.5	83.11	83.11							81.73				81.71	98.1			Chr3 CTR Gene vs. Chr6 CTR Gene	1881	732.4	1149	184	368
	98.99	98.99	98.73	98.73							80.07				81.85	98.73			Chr3 CTR Gene vs. Chr6 No CTR Gene	1881	1836	44.7	184	91
	97.99	97.99	98.1	98.1							80.97				80.44	98.09			Chr3 CTR Gene vs. Chr7 CTR Gene	1881	1807	74.36	184	153
	97.86	97.86	98.77	98.77							82.11				81.01	95.41			Chr3 CTR Gene vs. Chr7 No CTR Gene	1881	1797	84.62	184	147
	97.87	97.87	99.36	99.36							82.55				81.31	98.73			Chr3 CTR Gene vs. ChrR CTR Gene	1881	1896	-15.07	184	396
	83.41	83.41	95.76	95.76							84.57				80.44	95.88			Chr3 CTR Gene vs. ChrR No CTR Gene	1881	1949	-67.98	184	384
	93.47	93.47	98.63	98.63							82.23				81.85	94.85			Chr3 No CTR Gene vs. Chr4 CTR Gene	1970	2101	-130.9	156	172
	91.18	91.18	98.73	98.73							84.67				84.57	94.85			Chr3 No CTR Gene vs. Chr4 No CTR Gene	1970	2101	-130.9	156	172
	94.05	94.05	98.09	98.09							85.53				84.34	99.25			Chr3 No CTR Gene vs. Chr5 CTR Gene	1970	1919	50.82	156	108
	84.94	84.94	99.36	99.36							95.42				83.02	97.37			Chr3 No CTR Gene vs. Chr5 No CTR Gene	1970	1919	50.82	156	108
	99.57	99.57	96.11	96.11							81.34				97.81	97.81			Chr3 No CTR Gene vs. Chr6 CTR Gene	1970	732.4	1237	156	368
	99.01	99.01	80.34	80.34							88.91				97.73	97.73			Chr3 No CTR Gene vs. Chr6 No CTR Gene	1970	1836	133.4	156	91
	99.01	99.01	99.57	99.57							82.46				98.1	87.16			Chr3 No CTR Gene vs. Chr7 CTR Gene	1970	1807	163.1	156	153
	90.04	90.04	97.63	97.63							81.03				98.73	95.51			Chr3 No CTR Gene vs. Chr7 No CTR Gene	1970	1797	173.3	156	147
	97.47	97.47	80.14	86.09							84.04				98.09	98.73			Chr3 No CTR Gene vs. ChrR CTR Gene	1970	1896	73.64	156	396
	97.84	97.84	84.78	89.43							86.01				95.41	98.75			Chr3 No CTR Gene vs. ChrR No CTR Gene	1970	1949	20.74	156	384
	97.63	97.63	89.87	89.43							81.97				98.73	95.56			Chr4 CTR Gene vs. Chr4 No CTR Gene	2101	2101	0	172	172
	83.14	83.14	88.07	86.09							81.83				95.88	100			Chr4 CTR Gene vs. Chr5 CTR Gene	2101	1919	181.7	172	108
	81.51	81.51	81.09	87.53							81.83				94.85	87.16			Chr4 CTR Gene vs. Chr5 No CTR Gene	2101	1919	181.7	172	108
	88.4	88.4	84.23	98.24							81.97				94.85	80.54			Chr4 CTR Gene vs. Chr6 CTR Gene	2101	732.4	1368	172	368
	83.14	83.14	81.34	98.23							83.02				99.25	100			Chr4 CTR Gene vs. Chr6 No CTR Gene	2101	1836	264.3	172	91
	81.51	81.51	89.08	91.49							88.39				97.37	97.67			Chr4 CTR Gene vs. Chr7 CTR Gene	2101	1807	294	172	153
	88.4	88.4	82.01	98.71							89.47				97.81	94.85			Chr4 CTR Gene vs. Chr7 No CTR Gene	2101	1797	304.2	172	147
	96.47	96.47	83.99	86.59							92.92				97.73	100			Chr4 CTR Gene vs. ChrR CTR Gene	2101	1896	204.5	172	396
	96.47	96.47	84.87	93.91							82.56				87.16	94.85			Chr4 CTR Gene vs. ChrR No CTR Gene	2101	1949	151.6	172	384
	91.13	91.13	81.09	91.07							82.58				95.51	97.67			Chr4 No CTR Gene vs. Chr5 CTR Gene	2101	1919	181.7	172	108
	90.36	90.36	85.18	94.17							81.17				98.73	93.97			Chr4 No CTR Gene vs. Chr5 No CTR Gene	2101	1919	181.7	172	108
	92.41	92.41	80.46	93.33							80.16				98.75	92.38			Chr4 No CTR Gene vs. Chr6 CTR Gene	2101	732.4	1368	172	368
	92.41	92.41	87.79	87.53							81.64				95.56	93.14			Chr4 No CTR Gene vs. Chr6 No CTR Gene	2101	1836	264.3	172	91
	98.46	98.46	85.23	97.79							83.04				100	96.04			Chr4 No CTR Gene vs. Chr7 CTR Gene	2101	1807	294	172	153
	100	100	90.85	97.79							85.47				87.16	92.81			Chr4 No CTR Gene vs. Chr7 No CTR Gene	2101	1797	304.2	172	147
	95.9	95.9	81.02	88.05							87.34				80.54	92.81			Chr4 No CTR Gene vs. ChrR CTR Gene	2101	1896	204.5	172	396
	87.76	87.76	88.24	88.64							92.72				100	88.8			Chr4 No CTR Gene vs. ChrR No CTR Gene	2101	1949	151.6	172	384
	100	100	80.14	90.26							80.42				97.67	87.69			Chr5 CTR Gene vs. Chr5 No CTR Gene	1919	1919	0	108	108
	92.37	92.37	82.12	88.05							81.32				94.85	95.38			Chr5 CTR Gene vs. Chr6 CTR Gene	1919	732.4	1187	108	368
	95.16	95.16	89.41	98.04							81.47				100	87.41			Chr5 CTR Gene vs. Chr6 No CTR Gene	1919	1836	82.59	108	91
	95.24	95.24	81.78	97.03							81.85				94.85	88.43			Chr5 CTR Gene vs. Chr7 CTR Gene	1919	1807	112.3	108	153
	99.3	99.3	82.85	97.03							80.69				97.67	96.91			Chr5 CTR Gene vs. Chr7 No CTR Gene	1919	1797	122.5	108	147
	90.89	90.89	81.09	98.06							80				93.97	97.17			Chr5 CTR Gene vs. ChrR CTR Gene	1919	1896	22.82	108	396
	99.61	99.61	81.34	100							80.21				92.38	97.17			Chr5 CTR Gene vs. ChrR No CTR Gene	1919	1949	-30.08	108	384
	89.71	89.71	95.05	100							81.2				93.14	97.14			Chr5 No CTR Gene vs. Chr6 CTR Gene	1919	732.4	1187	108	368
	100	100	82.71	100							81.85				96.04	95.73			Chr5 No CTR Gene vs. Chr6 No CTR Gene	1919	1836	82.59	108	91
	99.61	99.61	83.4	100							85.5				92.81	90.98			Chr5 No CTR Gene vs. Chr7 CTR Gene	1919	1807	112.3	108	153
	99.61	99.61	83.9	100							80.07				92.81	97.59			Chr5 No CTR Gene vs. Chr7 No CTR Gene	1919	1797	122.5	108	147
	99.41	99.41	80.29	100							82.62				88.8	97.56			Chr5 No CTR Gene vs. ChrR CTR Gene	1919	1896	22.82	108	396
	99.02	99.02	89.41	92.7							81.73				87.69	97.53			Chr5 No CTR Gene vs. ChrR No CTR Gene	1919	1949	-30.08	108	384
	98.04	98.04	95.05	94.79							80.77				95.38	97.53			Chr6 CTR Gene vs. Chr6 No CTR Gene	732.4	1836	-1104	368	91
	91.36	91.36	83.4	91.59							81.93				87.41	95.56			Chr6 CTR Gene vs. Chr7 CTR Gene	732.4	1807	-1074	368	153
	99.61	99.61	81.05	93.13							80.49				88.43	95.79			Chr6 CTR Gene vs. Chr7 No CTR Gene	732.4	1797	-1064	368	147
	94.38	94.38	89.87	95.28							80.29				96.91	94.44			Chr6 CTR Gene vs. ChrR CTR Gene	732.4	1896	-1164	368	396
	94.65	94.65	90.85	94.97							81.49				97.17	97.59			Chr6 CTR Gene vs. ChrR No CTR Gene	732.4	1949	-1217	368	384
	98.25	98.25	89.08	94.67							83.55				97.17	96.63			Chr6 No CTR Gene vs. Chr7 CTR Gene	1836	1807	29.66	91	153
	92.35	92.35	86.09	94.65							80.73				97.14	95.76			Chr6 No CTR Gene vs. Chr7 No CTR Gene	1836	1797	39.92	91	147
	84.51	84.51	89.43	94.65							82.5				95.73	97.49			Chr6 No CTR Gene vs. ChrR CTR Gene	1836	1896	-59.77	91	396
	93.78	93.78	89.43	93.85							80.03				90.98	100			Chr6 No CTR Gene vs. ChrR No CTR Gene	1836	1949	-112.7	91	384
	93.78	93.78	86.09	93.96							80.07				97.59	95.76			Chr7 CTR Gene vs. Chr7 No CTR Gene	1807	1797	10.26	153	147
	84.51	84.51	87.53	92.59							80.97				97.56	96.05			Chr7 CTR Gene vs. ChrR CTR Gene	1807	1896	-89.44	153	396
	98.48	98.48	98.24	97.45							85.68				97.53	83.25			Chr7 CTR Gene vs. ChrR No CTR Gene	1807	1949	-142.3	153	384
	97.7	97.7	98.23								82.92				97.53	87.97			Chr7 No CTR Gene vs. ChrR CTR Gene	1797	1896	-99.7	147	396
	100	100	91.49								81.38				95.56	90.7			Chr7 No CTR Gene vs. ChrR No CTR Gene	1797	1949	-152.6	147	384
	97.87	97.87	98.71								82.48				95.79	83.25			ChrR CTR Gene vs. ChrR No CTR Gene	1896	1949	-52.9	396	384
	95.79	95.79	86.59								81.9				94.44	95.7
	89.2	89.2	93.91								81.62				97.59	95.7			* p<0.05, **p<0.01, ***p<0.001, ****p<0.0001
	93.71	93.71	91.07								83.69				96.63	87.97
	89.64	89.64	94.17								81.85				95.76	94.44
	89.78	89.78	93.33								83.62				97.49	90.7
	80.68	80.68	94.64								81.14				100	83.25
	80.47	80.47	94.64								81.86				95.76	83.25
	96.91	96.91	97.7								81.73				96.05	96.05
	98.86	98.86	80.38								84.31				83.25	94.44
	96.47	96.47	83.82								81.98				87.97	100
	96.67	96.67	83.82								81.2				90.7	97.49
	98.88	98.88	81.41								80.84				83.25	100
	80.47	80.47	95.79								94.06				95.7	100
	93.81	93.81	97								84.38				95.7	100
	93.75	93.75	97.7								80.21				87.97	85.48
	88.78	88.78	87.53								81.9				94.44	99.58
	90.32	90.32	97.79								80.78				90.7	98.94
	84.04	84.04	97.79								80.5				83.25	83.48
	84.04	84.04	88.05								80.45				83.25	99.58
	98	98	88.64								81.74				96.05	95.55
	98	98	90.26								85.04				94.44	99.58
	99.22	99.22	88.05								80.91				100	94.35
	93.61	93.61	98.04								80				97.49	86.44
	99.22	99.22	97.03								88.32				100	93.2
	87.69	87.69	97.03								82.66				100	93.96
	89.55	89.55	98.06								87				100	98.39
	93.23	93.23	100								83.69				85.48	98.58
	98.11	98.11	100								81.28				99.58	97.86
	95.73	95.73	100								82.47				98.94	92.65
	95.37	95.37	100								82.48				83.48	91.5
	95.79	95.79	100								83.85				99.58	93.45
	96.5	96.5	100								80.71				95.55	96.58
	97.01	97.01	92.7								82.33				99.58	94.44
	99.41	99.41	94.79								82.74				94.35	97.87
	98.95	98.95	91.59								81.45				86.44	97.87
	95.04	95.04	93.13								80.9				93.2	97.09
	95.37	95.37	95.28								84.05				93.96	92.61
	97.5	97.5	94.97								87.17				98.39	93.47
	95.79	95.79	94.67								80.8				98.58	93.06
	99.85	99.85	94.65								83.01				97.86	92.65
			94.65								82.92				92.65	92.87
			93.85								84.06				91.5	86.53
			93.96								82.37				93.45	92.81
			92.59								82.06				96.58	93.04
			97.45								84.54				94.44	98.73
											84.96				97.87	99.15
											86.96				97.87	93.84
											81.38				97.09	93.42
											81.57				92.61	92.99
											82.71				93.47	87.26
											81.4				93.06	84.91
											81.85				92.65	99.41
											83.22				92.87	99.02
											84.67				86.53	99.02
											81.92				92.81	99.02
											83.2				93.04	97.84
											80.18				98.73	98.82
											81.47				99.15	99.02
											89.93				93.84	89.41
											80.31				93.42	91.24
											81.32				92.99	94.38
											83.07				87.26	94.79
											81.55				84.91	90.7
											88.8				99.41	96.67
											80.77				99.02	97.62
											80.8				99.02	97.59
											82.53				99.02	96.39
											80.02				97.84	97.56
											81.04				98.82	90.86
											82.25				99.02	86.36
											80.84				89.41	86.36
											80.23				91.24	93.71
											82.78				94.38	88.81
											81.84				94.79	90.32
											92.14				90.7	90.71
											84.67				96.67	90.5
											84.63				97.62	92.81
											80.02				97.59	97.37
											89.93				96.39	98.12
											81.49				97.56	95.79
											80.42				90.86	96.09
											81.58				86.36	95.37
											81.74				86.36	95.74
											84.63				93.71	95.74
											82.71				88.81	95.04
											84.67				90.32	97.99
											82.55				90.71	97.99
											81.58				90.5	87.46
											85.64				92.81	91.54
											94.06				97.37	90.64
											81.9				98.12	89.81
											83.63				95.79	94.96
											98.73				96.09	99.58
											98.73				95.37	95.97
											98.77				95.74	94.88
											100				95.74	86.3
											96.11				95.04	100
											98.63				97.99	99.36
											98.73				97.99	100
											98.73				87.46	83.91
											100				91.54	85.88
											96.11				90.64	91.6
											91.24				89.81	91.6
											95.38				94.96	97.09
											91.79				99.58	92.61
											92.68				95.97	94.05
											91.49				94.88	94.05
											82.62				86.3	93.45
											82.62				100	93.64
											87.8				99.36	88.45
											90.71				100	84.8
											94.24				83.91	85.11
											93.75				85.88	84.89
											92.78				91.6	85.11
															91.6	85.11
															97.09	84.24
															92.61	90.48
															94.05	98.49
															94.05	98.24
															93.45	91.75
															93.64	98.97
															88.45	86.64
															84.8	87.46
															85.11	85.71
															84.89	88.68
															85.11	90.84
															85.11	88.84
															84.24	80.6
															90.48	82.49
															98.49	91.68
															98.24
															91.75
															98.97
															86.64
															87.46
															85.71
															88.68
															90.84
															88.84
															80.6
															82.49
															91.68

## Sheet: Figure 2-figure supplement 3D&E
These data were generated using Supplementary File 2 and sequencing data provided from the Candida Genome Database (www.candidagenome.org C. albicans SC5314 Assembly 21)
These data were used in generating Figure 2-figure supplement 2D&E
* p<0.05, **p<0.01, ***p<0.001, ****p<0.0001
Repeat Status	ORF19 ID	Length (bp)	GC %		Repeat Status	n-value		Figure 2-figure supplement 3D
Repeat CDS	orf19.6070	3204	39.23		Repeat CDS	n= 236		Null Hypothesis: There is no significant difference in the distribution of copy lengths between ORFs contained within long repeat sequences and copy length of ORFs not contained within long repeaat sequences (the complete coding sequence of all ORFs were compared, see Methods).
Repeat CDS	orf19.3354	789	40.18		Non-repeat CDS	n= 5959		Table Analyzed	Repeat CDS Length
Repeat CDS	orf19.4527	1638	39.19
Repeat CDS	orf19.4526	1029	36.15					Repeat CDS
Repeat CDS	orf19.3664	996	36.65					vs.
Repeat CDS	orf19.3668	1638	37.55					Non-repeat CDS
Repeat CDS	orf19.2929	5694	35.55
Repeat CDS	orf19.3061	552	39.67					Kolmogorov-Smirnov test
Repeat CDS	orf19.1037	1773	35.03					P value	0.0007
Repeat CDS	orf19.4463	1071	32.68					Exact or approximate P value?	Approximate
Repeat CDS	orf19.4476	1035	35.17					P value summary	***
Repeat CDS	orf19.4482	1767	34.47					Significantly different? (P < 0.05)	Yes
Repeat CDS	orf19.1048	1035	33.43					Kolmogorov-Smirnov D	0.1324
Repeat CDS	orf19.1051	396	37.88
Repeat CDS	orf19.1052	393	35.62					Figure 2-figure supplement 3E
Repeat CDS	orf19.1059	318	37.74					Null Hypothesis: There is no significant difference in the distribution of percent GC content between ORFs contained within long repeat sequences and ORFs not contained within long repeat sequences (the complete coding sequence of all ORFs were compared, see Methods).
Repeat CDS	orf19.1061	411	37.47					Table Analyzed	Repeat CDS GC% Content
Repeat CDS	orf19.1065	1938	39.16
Repeat CDS	orf19.772	1287	35.59					Repeat CDS
Repeat CDS	orf19.750	537	41.53					vs.
Repeat CDS	orf19.2467	1038	38.25					Non-repeat CDS
Repeat CDS	orf19.2461	987	34.55
Repeat CDS	orf19.6265	393	37.66					Kolmogorov-Smirnov test
Repeat CDS	orf19.2800	96	34.38					P value	< 0.0001
Repeat CDS	orf19.5113	1047	42.69					Exact or approximate P value?	Approximate
Repeat CDS	orf19.382	1377	41.83					P value summary	****
Repeat CDS	orf19.4821	1407	39.52					Significantly different? (P < 0.05)	Yes
Repeat CDS	orf19.4823	1392	39.01					Kolmogorov-Smirnov D	0.2435
Repeat CDS	orf19.4824	819	36.14
Repeat CDS	orf19.4856	1416	39.55					* p<0.05, **p<0.01, ***p<0.001, ****p<0.0001
Repeat CDS	orf19.4857	819	35.78
Repeat CDS	orf19.4899	2841	36.82
Repeat CDS	orf19.1005	1809	32.61
Repeat CDS	orf19.2311	783	38.7
Repeat CDS	orf19.2296	7656	42.37
Repeat CDS	orf19.1143	1185	33.42
Repeat CDS	orf19.6353	2079	33.86
Repeat CDS	orf19.4916	1470	37.89
Repeat CDS	orf19.4921	2172	36.88
Repeat CDS	orf19.4949	303	34.98
Repeat CDS	orf19.4980	1971	36.58
Repeat CDS	orf19.5017	2016	36.41
Repeat CDS	orf19.7205	2025	37.93
Repeat CDS	orf19.7219	1146	37.87
Repeat CDS	orf19.7231	1149	38.29
Repeat CDS	orf19.7239	1983	41.91
Repeat CDS	orf19.2023	1641	37.84
Repeat CDS	orf19.2021	1653	38.84
Repeat CDS	orf19.2020	1653	37.27
Repeat CDS	orf19.2013	2064	38.42
Repeat CDS	orf19.1999	582	34.71
Repeat CDS	orf19.1490	4230	41.8
Repeat CDS	orf19.1492	1968	23.98
Repeat CDS	orf19.1523	1659	35.2
Repeat CDS	orf19.1526	5073	36.7
Repeat CDS	orf19.1552	576	36.81
Repeat CDS	orf19.1581	333	38.74
Repeat CDS	orf19.1586	888	39.08
Repeat CDS	orf19.1589	1314	34.63
Repeat CDS	orf19.5842	786	41.6
Repeat CDS	orf19.5827	945	37.14
Repeat CDS	orf19.5826	1635	39.69
Repeat CDS	orf19.5820	1635	39.69
Repeat CDS	orf19.5816	1179	35.79
Repeat CDS	orf19.5809	1362	44.05
Repeat CDS	orf19.5797	888	38.96
Repeat CDS	orf19.857	1659	37.43
Repeat CDS	orf19.856	1659	36.77
Repeat CDS	orf19.4515	744	36.56
Repeat CDS	orf19.4511	2064	35.47
Repeat CDS	orf19.4510	2034	34.27
Repeat CDS	orf19.4506	1254	32.22
Repeat CDS	orf19.156	1482	33.74
Repeat CDS	orf19.5211	1302	39.4
Repeat CDS	orf19.31	756	36.38
Repeat CDS	orf19.33	306	36.27
Repeat CDS	orf19.2168	1344	29.76
Repeat CDS	orf19.5121	2766	35.21
Repeat CDS	orf19.1435	1377	41.61
Repeat CDS	orf19.207	4215	40.74
Repeat CDS	orf19.206	3147	38.99
Repeat CDS	orf19.1401	1962	45.87
Repeat CDS	orf19.1372	720	35.69
Repeat CDS	orf19.1782	720	35.56
Repeat CDS	orf19.1780	1239	30.35
Repeat CDS	orf19.1774	1143	34.21
Repeat CDS	orf19.1765	1257	30.47
Repeat CDS	orf19.5341	789	40.43
Repeat CDS	orf19.5404.1	3735	39.12
Repeat CDS	orf19.1725	2178	45.13
Repeat CDS	orf19.1652	2130	38.31
Repeat CDS	orf19.239	3912	32.59
Repeat CDS	orf19.279	411	49.64
Repeat CDS	orf19.284	657	47.34
Repeat CDS	orf19.292	657	47.64
Repeat CDS	orf19.297	492	47.76
Repeat CDS	orf19.301	2262	43.19
Repeat CDS	orf19.309	1578	37.52
Repeat CDS	orf19.310	1521	36.16
Repeat CDS	orf19.355	1272	37.11
Repeat CDS	orf19.357	852	43.08
Repeat CDS	orf19.359	750	36.67
Repeat CDS	orf19.6958	1521	36.23
Repeat CDS	orf19.6925	393	39.69
Repeat CDS	orf19.6924	399	41.6
Repeat CDS	orf19.918	4539	38.44
Repeat CDS	orf19.5958	4500	35.91
Repeat CDS	orf19.6000	4506	35.6
Repeat CDS	orf19.6002	789	33.08
Repeat CDS	orf19.7362	2214	33.6
Repeat CDS	orf19.7363	2223	35
Repeat CDS	orf19.7382	1239	36.56
Repeat CDS	orf19.7397	3270	36.73
Repeat CDS	orf19.7397.3	792	43.24
Repeat CDS	orf19.7414	4101	39.5
Repeat CDS	orf19.7400	4707	40.31
Repeat CDS	orf19.7398.1	591	43.99
Repeat CDS	orf19.7419	543	45.67
Repeat CDS	orf19.7422	1173	41.94
Repeat CDS	orf19.7398	498	40.36
Repeat CDS	orf19.6801	1734	34.49
Repeat CDS	orf19.6791	411	33.09
Repeat CDS	orf19.6771	690	37.1
Repeat CDS	orf19.5636	726	46.14
Repeat CDS	orf19.5674	753	43.82
Repeat CDS	orf19.5678	1590	42.8
Repeat CDS	orf19.4173	1590	43.08
Repeat CDS	orf19.4170	825	33.82
Repeat CDS	orf19.4662	1836	39.71
Repeat CDS	orf19.2743	1821	45.03
Repeat CDS	orf19.2730	1821	45.03
Repeat CDS	orf19.2671	1344	41.59
Repeat CDS	orf19.3362	1344	42.04
Repeat CDS	orf19.1327	2166	42.57
Repeat CDS	orf19.1321	1905	43.04
Repeat CDS	orf19.1596	1797	33.11
Repeat CDS	orf19.3820	1551	36.81
Repeat CDS	orf19.1255	2919	34.6
Repeat CDS	orf19.1264	2217	36.99
Repeat CDS	orf19.1273	393	33.08
Repeat CDS	orf19.2866	1551	36.88
Repeat CDS	orf19.3087	582	38.14
Repeat CDS	orf19.575	3750	41.81
Repeat CDS	orf19.3160	384	44.01
Repeat CDS	orf19.4216	384	44.27
Repeat CDS	orf19.4241	315	37.14
Repeat CDS	orf19.2651	1260	31.27
Repeat CDS	orf19.6676	900	47.33
Repeat CDS	orf19.1124.2	900	47.44
Repeat CDS	orf19.1117	1140	36.75
Repeat CDS	orf19.3924	1140	32.46
Repeat CDS	orf19.3997	1050	42.57
Repeat CDS	orf19.6336	2619	44.29
Repeat CDS	orf19.4215	1878	38.82
Repeat CDS	orf19.4211	1860	36.08
Repeat CDS	orf19.84	1701	38.45
Repeat CDS	orf19.97	1716	36.36
Repeat CDS	orf19.99	1029	42.08
Repeat CDS	orf19.105	1077	42.53
Repeat CDS	orf19.111	1707	35.62
Repeat CDS	orf19.125	1224	31.94
Repeat CDS	orf19.3443	1212	32.34
Repeat CDS	orf19.3433	1221	34.32
Repeat CDS	orf19.3470	2382	31.82
Repeat CDS	orf19.5542	1257	36.75
Repeat CDS	orf19.5544	1944	35.03
Repeat CDS	orf19.5584	2433	32.51
Repeat CDS	orf19.5585	1257	36.99
Repeat CDS	orf19.5716	1254	36.84
Repeat CDS	orf19.5718	2436	32.06
Repeat CDS	orf19.5723	1992	37.2
Repeat CDS	orf19.5736	4044	38.67
Repeat CDS	orf19.2158	1686	46.44
Repeat CDS	orf19.2160	1746	45.36
Repeat CDS	orf19.2163	2514	46.82
Repeat CDS	orf19.7114	3057	43.6
Repeat CDS	orf19.6486	459	40.09
Repeat CDS	orf19.6484	459	38.78
Repeat CDS	orf19.6472	489	39.47
Repeat CDS	orf19.5179	1392	39.51
Repeat CDS	orf19.5177	1935	35.04
Repeat CDS	orf19.5172	1362	38.11
Repeat CDS	orf19.1345	1383	37.24
Repeat CDS	orf19.1330	1821	34.49
Repeat CDS	orf19.6690	2079	33.53
Repeat CDS	orf19.6703	1842	35.18
Repeat CDS	orf19.5508	711	32.49
Repeat CDS	orf19.7545	2007	34.18
Repeat CDS	orf19.7544	753	42.23
Repeat CDS	orf19.7539.1	1170	44.7
Repeat CDS	orf19.7523	1530	40.13
Repeat CDS	orf19.7506	1224	34.31
Repeat CDS	orf19.7487	1257	33.57
Repeat CDS	orf19.3269	4923	36.83
Repeat CDS	orf19.3234	1179	33.59
Repeat CDS	orf19.3221	3450	34.43
Repeat CDS	orf19.2583	1872	36.06
Repeat CDS	orf19.2585	591	30.96
Repeat CDS	orf19.2602	2352	41.16
Repeat CDS	orf19.2619	1389	34.34
Repeat CDS	orf19.3749	2718	34.58
Repeat CDS	orf19.3746	2790	35.41
Repeat CDS	orf19.3733	1239	33.49
Repeat CDS	orf19.3727	1386	35.06
Repeat CDS	orf19.176	1101	35.88
Repeat CDS	orf19.2834	1443	32.43
Repeat CDS	orf19.2847.1 (Pseudogene)	792	34.22
Repeat CDS	orf19.2378	354	33.62
Repeat CDS	orf19.4384	1689	48.96
Repeat CDS	orf19.4380.1	2604	42.95
Repeat CDS	orf19.4361	2826	43.95
Repeat CDS	orf19.4379	2604	42.93
Repeat CDS	orf19.465	2826	43.9
Repeat CDS	orf19.654	828	35.08
Repeat CDS	orf19.638	1140	36.84
Repeat CDS	orf19.555	828	35.02
Repeat CDS	orf19.3878	1173	35.21
Repeat CDS	orf19.700	1824	33.96
Repeat CDS	orf19.1855	1815	33.61
Repeat CDS	orf19.1854	318	37.42
Repeat CDS	orf19.1853	411	36.25
Repeat CDS	orf19.2360	6651	36.52
Repeat CDS	orf19.11	720	41.81
Repeat CDS	orf19.734	1419	38.94
Repeat CDS	orf19.730	2640	40.19
Repeat CDS	orf19.6116	1131	38.11
Repeat CDS	orf19.2620	687	42.21
Repeat CDS	orf19.729.1	2640	40.3
Repeat CDS	orf19.3711	2190	31.96
Repeat CDS	orf19.604	2130	40.19
Repeat CDS	orf19.6367	1842	41.37
Repeat CDS	orf19.6420	1371	44.93
Repeat CDS	orf19.6608	2169	34.07
Repeat CDS	orf19.7550	2037	34.07
Repeat CDS	orf19.7606	492	45.33
Repeat CDS	orf19.7680	822	43.92
Non-repeat CDS	orf19.1002	1893	33.44
Non-repeat CDS	orf19.1026	993	31.12
Non-repeat CDS	orf19.1026.1	270	28.52
Non-repeat CDS	orf19.1027	1110	30.63
Non-repeat CDS	orf19.1028	1179	30.96
Non-repeat CDS	orf19.1029	933	24.87
Non-repeat CDS	orf19.1030	1281	32.71
Non-repeat CDS	orf19.1031	3222	34.73
Non-repeat CDS	orf19.1032	1737	38.63
Non-repeat CDS	orf19.1033	1788	32.44
Non-repeat CDS	orf19.1034	552	32.97
Non-repeat CDS	orf19.1035	2844	36.85
Non-repeat CDS	orf19.1036	1848	35.34
Non-repeat CDS	orf19.1039	1107	24.48
Non-repeat CDS	orf19.1040	645	27.75
Non-repeat CDS	orf19.1041	1488	26.95
Non-repeat CDS	orf19.1042	849	36.63
Non-repeat CDS	orf19.1043	918	23.53
Non-repeat CDS	orf19.1045	1062	27.87
Non-repeat CDS	orf19.1047	2550	30.67
Non-repeat CDS	orf19.1049	585	27.18
Non-repeat CDS	orf19.1050	903	26.36
Non-repeat CDS	orf19.1053	1173	31.2
Non-repeat CDS	orf19.1054	810	27.78
Non-repeat CDS	orf19.1055	1287	33.1
Non-repeat CDS	orf19.1057	570	34.91
Non-repeat CDS	orf19.1058	834	32.97
Non-repeat CDS	orf19.1060	510	33.73
Non-repeat CDS	orf19.1062	1236	31.72
Non-repeat CDS	orf19.1063	1185	26.58
Non-repeat CDS	orf19.1064	2031	38.06
Non-repeat CDS	orf19.1066	765	28.1
Non-repeat CDS	orf19.1067	786	30.79
Non-repeat CDS	orf19.1069	1611	35.38
Non-repeat CDS	orf19.1070	951	30.81
Non-repeat CDS	orf19.1133	3864	37.63
Non-repeat CDS	orf19.1135	2436	29.29
Non-repeat CDS	orf19.1136	438	24.66
Non-repeat CDS	orf19.1137	675	30.44
Non-repeat CDS	orf19.1139	2925	35.9
Non-repeat CDS	orf19.1140	627	29.67
Non-repeat CDS	orf19.1142	1920	33.54
Non-repeat CDS	orf19.1144	3366	36.96
Non-repeat CDS	orf19.1146	369	39.84
Non-repeat CDS	orf19.1148	792	34.97
Non-repeat CDS	orf19.1149	1080	36.85
Non-repeat CDS	orf19.1150	1419	36.43
Non-repeat CDS	orf19.1150.1	222	30.18
Non-repeat CDS	orf19.1152	798	35.21
Non-repeat CDS	orf19.1153	1707	36.03
Non-repeat CDS	orf19.1154	474	38.61
Non-repeat CDS	orf19.1155	855	38.01
Non-repeat CDS	orf19.1156	1155	35.84
Non-repeat CDS	orf19.1158	894	35.23
Non-repeat CDS	orf19.1159	1521	39.64
Non-repeat CDS	orf19.1160	648	34.1
Non-repeat CDS	orf19.1161	5133	39.96
Non-repeat CDS	orf19.1162	378	38.62
Non-repeat CDS	orf19.1162.1	534	36.89
Non-repeat CDS	orf19.1163	1092	35.9
Non-repeat CDS	orf19.1164	561	45.28
Non-repeat CDS	orf19.1166	3891	41.61
Non-repeat CDS	orf19.1167	1161	37.04
Non-repeat CDS	orf19.1168	588	39.12
Non-repeat CDS	orf19.1169	951	34.81
Non-repeat CDS	orf19.1170	807	31.72
Non-repeat CDS	orf19.1171	2259	33.86
Non-repeat CDS	orf19.1227	591	31.81
Non-repeat CDS	orf19.1228	1095	31.78
Non-repeat CDS	orf19.1229	3138	24.38
Non-repeat CDS	orf19.1232	1116	28.94
Non-repeat CDS	orf19.1233	1626	30.75
Non-repeat CDS	orf19.177	2397	30.29
Non-repeat CDS	orf19.1821	312	30.45
Non-repeat CDS	orf19.1822	2532	33.97
Non-repeat CDS	orf19.1823	2742	32.39
Non-repeat CDS	orf19.1824	930	36.99
Non-repeat CDS	orf19.1825	2226	34.41
Non-repeat CDS	orf19.1826	1869	29.59
Non-repeat CDS	orf19.1827	1359	27.59
Non-repeat CDS	orf19.1828	1050	28.57
Non-repeat CDS	orf19.1830	333	27.63
Non-repeat CDS	orf19.1831	423	29.31
Non-repeat CDS	orf19.1832	1794	33.72
Non-repeat CDS	orf19.1833	1440	30.97
Non-repeat CDS	orf19.1834	2733	27.66
Non-repeat CDS	orf19.1835	1905	29.87
Non-repeat CDS	orf19.1836	1356	28.69
Non-repeat CDS	orf19.1837	717	34.17
Non-repeat CDS	orf19.1839	4998	33.37
Non-repeat CDS	orf19.1840	3687	37.62
Non-repeat CDS	orf19.2297	771	38.52
Non-repeat CDS	orf19.2298	1314	36.3
Non-repeat CDS	orf19.2299	306	35.95
Non-repeat CDS	orf19.2301	696	36.93
Non-repeat CDS	orf19.2302	1470	35.78
Non-repeat CDS	orf19.2303	702	34.9
Non-repeat CDS	orf19.2304	1029	34.4
Non-repeat CDS	orf19.2305	375	30.67
Non-repeat CDS	orf19.2306	537	32.77
Non-repeat CDS	orf19.2307	1632	36.83
Non-repeat CDS	orf19.2308	1086	32.04
Non-repeat CDS	orf19.2309	2118	33.24
Non-repeat CDS	orf19.2309.2	765	42.48
Non-repeat CDS	orf19.2310	897	35.12
Non-repeat CDS	orf19.2310.1	192	41.15
Non-repeat CDS	orf19.2312	2040	37.6
Non-repeat CDS	orf19.2313	1191	35.94
Non-repeat CDS	orf19.2314	408	33.82
Non-repeat CDS	orf19.2315	1563	38.39
Non-repeat CDS	orf19.2317	534	34.46
Non-repeat CDS	orf19.2318.1	696	35.49
Non-repeat CDS	orf19.2319	2019	36.4
Non-repeat CDS	orf19.2320	1482	36.3
Non-repeat CDS	orf19.2322.3	657	35.31
Non-repeat CDS	orf19.2324	1317	38.5
Non-repeat CDS	orf19.2325	1554	37.39
Non-repeat CDS	orf19.2326	1458	37.24
Non-repeat CDS	orf19.2328	837	34.65
Non-repeat CDS	orf19.2329.1	414	35.27
Non-repeat CDS	orf19.2330	1296	35.11
Non-repeat CDS	orf19.2331	1338	33.71
Non-repeat CDS	orf19.2332	795	34.21
Non-repeat CDS	orf19.2333	1491	38.36
Non-repeat CDS	orf19.2334	969	30.24
Non-repeat CDS	orf19.2335	1491	32.46
Non-repeat CDS	orf19.2336	609	34.98
Non-repeat CDS	orf19.2337	1632	35.72
Non-repeat CDS	orf19.2340	2481	39.38
Non-repeat CDS	orf19.2341	459	35.73
Non-repeat CDS	orf19.2342	654	37.31
Non-repeat CDS	orf19.2343	1449	38.03
Non-repeat CDS	orf19.2343.1	390	34.62
Non-repeat CDS	orf19.2344	1158	46.63
Non-repeat CDS	orf19.2346	1875	37.23
Non-repeat CDS	orf19.2347	1794	35.34
Non-repeat CDS	orf19.2350	1563	39.67
Non-repeat CDS	orf19.2351	906	38.41
Non-repeat CDS	orf19.2352	975	37.23
Non-repeat CDS	orf19.2429	1356	31.38
Non-repeat CDS	orf19.2430	726	32.78
Non-repeat CDS	orf19.2431	342	26.02
Non-repeat CDS	orf19.2432	1104	30.62
Non-repeat CDS	orf19.2433	630	23.17
Non-repeat CDS	orf19.2434	1797	28.88
Non-repeat CDS	orf19.2435	2106	32.19
Non-repeat CDS	orf19.2436	2649	32.58
Non-repeat CDS	orf19.2437	1041	27.76
Non-repeat CDS	orf19.2438	543	30.94
Non-repeat CDS	orf19.2439	435	29.66
Non-repeat CDS	orf19.2439.1	237	37.55
Non-repeat CDS	orf19.2440	2553	26.48
Non-repeat CDS	orf19.2442	705	24.11
Non-repeat CDS	orf19.2443	2034	29.99
Non-repeat CDS	orf19.2444	933	31.4
Non-repeat CDS	orf19.2445	1647	34.73
Non-repeat CDS	orf19.2446	1071	28.48
Non-repeat CDS	orf19.2447	2091	31.37
Non-repeat CDS	orf19.2449	1773	40.1
Non-repeat CDS	orf19.2451	1389	32.33
Non-repeat CDS	orf19.2452	1248	29.73
Non-repeat CDS	orf19.2454	3021	28.4
Non-repeat CDS	orf19.2455	3396	30.3
Non-repeat CDS	orf19.2457	2076	29.72
Non-repeat CDS	orf19.2458	1542	33.46
Non-repeat CDS	orf19.2459	2919	37.65
Non-repeat CDS	orf19.2460	1056	33.9
Non-repeat CDS	orf19.2462	981	34.56
Non-repeat CDS	orf19.2463	1002	34.23
Non-repeat CDS	orf19.2465	1212	35.07
Non-repeat CDS	orf19.2468	921	34.42
Non-repeat CDS	orf19.2469	1017	38.64
Non-repeat CDS	orf19.2471	477	34.38
Non-repeat CDS	orf19.2472	693	34.2
Non-repeat CDS	orf19.2472.1	210	34.29
Non-repeat CDS	orf19.2473	1905	35.7
Non-repeat CDS	orf19.2474	1653	35.87
Non-repeat CDS	orf19.2475	396	40.4
Non-repeat CDS	orf19.2476	5055	32.96
Non-repeat CDS	orf19.2478	1143	32.98
Non-repeat CDS	orf19.2478.1	726	38.84
Non-repeat CDS	orf19.2479	1674	38.59
Non-repeat CDS	orf19.2480.1	408	37.25
Non-repeat CDS	orf19.2481	747	36.68
Non-repeat CDS	orf19.2483	432	39.12
Non-repeat CDS	orf19.2484	1254	35.57
Non-repeat CDS	orf19.2485	4281	33.59
Non-repeat CDS	orf19.2487	759	34.65
Non-repeat CDS	orf19.2488	1200	34.83
Non-repeat CDS	orf19.2489	3330	35.38
Non-repeat CDS	orf19.2492	1254	35.01
Non-repeat CDS	orf19.2494	1467	36.54
Non-repeat CDS	orf19.2495	4716	35.94
Non-repeat CDS	orf19.2661	996	44.28
Non-repeat CDS	orf19.2662	606	44.55
Non-repeat CDS	orf19.2663	1755	34.13
Non-repeat CDS	orf19.2778	2229	22.45
Non-repeat CDS	orf19.2779	513	42.3
Non-repeat CDS	orf19.2781	2517	26.22
Non-repeat CDS	orf19.2782	528	32.2
Non-repeat CDS	orf19.2783	1275	31.14
Non-repeat CDS	orf19.2784	945	25.5
Non-repeat CDS	orf19.2785	525	28.38
Non-repeat CDS	orf19.2786	3126	28.41
Non-repeat CDS	orf19.2787	1233	39.98
Non-repeat CDS	orf19.2788	1209	32.01
Non-repeat CDS	orf19.2789	960	32.71
Non-repeat CDS	orf19.2790	1095	37.99
Non-repeat CDS	orf19.2791	2865	40.49
Non-repeat CDS	orf19.2792	2859	32.21
Non-repeat CDS	orf19.2794	834	29.26
Non-repeat CDS	orf19.2795	975	29.54
Non-repeat CDS	orf19.2796	1995	31.63
Non-repeat CDS	orf19.2797	1872	34.94
Non-repeat CDS	orf19.2798	1968	35.98
Non-repeat CDS	orf19.2799	1152	33.94
Non-repeat CDS	orf19.2925	603	26.53
Non-repeat CDS	orf19.2926	2493	29.4
Non-repeat CDS	orf19.2927	1335	25.77
Non-repeat CDS	orf19.2928	1074	27.56
Non-repeat CDS	orf19.2930	1947	34.62
Non-repeat CDS	orf19.2933	1002	32.04
Non-repeat CDS	orf19.2934	531	27.87
Non-repeat CDS	orf19.2935	663	38.01
Non-repeat CDS	orf19.2936	471	31.42
Non-repeat CDS	orf19.2937	759	27.54
Non-repeat CDS	orf19.2938	2022	27.1
Non-repeat CDS	orf19.2939	627	28.39
Non-repeat CDS	orf19.2940	732	29.78
Non-repeat CDS	orf19.2941	1737	43.7
Non-repeat CDS	orf19.2942	1761	37.02
Non-repeat CDS	orf19.2943.5	300	29.67
Non-repeat CDS	orf19.2945	1695	33.98
Non-repeat CDS	orf19.2946	1512	34.79
Non-repeat CDS	orf19.2947	879	36.97
Non-repeat CDS	orf19.2948	750	36.13
Non-repeat CDS	orf19.2949	4374	36.19
Non-repeat CDS	orf19.2951	1080	34.91
Non-repeat CDS	orf19.2952	1440	37.22
Non-repeat CDS	orf19.2953	516	35.85
Non-repeat CDS	orf19.2954	603	40.13
Non-repeat CDS	orf19.2956	828	39.25
Non-repeat CDS	orf19.2957	2427	34.86
Non-repeat CDS	orf19.2958	2529	34.88
Non-repeat CDS	orf19.2959	303	35.97
Non-repeat CDS	orf19.2959.1	174	33.33
Non-repeat CDS	orf19.2960	1491	35.75
Non-repeat CDS	orf19.2961	1194	33.5
Non-repeat CDS	orf19.2962	888	32.88
Non-repeat CDS	orf19.2963	921	36.05
Non-repeat CDS	orf19.2964	2388	38.11
Non-repeat CDS	orf19.2965	1053	37.51
Non-repeat CDS	orf19.2965.1	192	40.62
Non-repeat CDS	orf19.2966	759	38.34
Non-repeat CDS	orf19.2967	1053	39.89
Non-repeat CDS	orf19.2968	603	34.49
Non-repeat CDS	orf19.2969	2559	38.77
Non-repeat CDS	orf19.2970	4215	37.44
Non-repeat CDS	orf19.2971	1770	33.33
Non-repeat CDS	orf19.2972	1716	33.8
Non-repeat CDS	orf19.2973	2040	35.59
Non-repeat CDS	orf19.2974	603	32.17
Non-repeat CDS	orf19.2975	867	34.95
Non-repeat CDS	orf19.2977	759	38.6
Non-repeat CDS	orf19.2978	375	40.53
Non-repeat CDS	orf19.2980	2178	34.85
Non-repeat CDS	orf19.2982	1431	35.5
Non-repeat CDS	orf19.2983	1113	37.65
Non-repeat CDS	orf19.2984	1368	37.65
Non-repeat CDS	orf19.2985	519	43.16
Non-repeat CDS	orf19.2986	378	35.19
Non-repeat CDS	orf19.2987	1788	37.64
Non-repeat CDS	orf19.2988	1266	35.23
Non-repeat CDS	orf19.2989	1029	40.52
Non-repeat CDS	orf19.2990	1317	38.95
Non-repeat CDS	orf19.2991	1761	36.91
Non-repeat CDS	orf19.2992	321	42.37
Non-repeat CDS	orf19.2994	609	40.56
Non-repeat CDS	orf19.2994.1	429	39.63
Non-repeat CDS	orf19.2995	759	36.63
Non-repeat CDS	orf19.2996	3156	35.96
Non-repeat CDS	orf19.2998	630	38.89
Non-repeat CDS	orf19.3000	2418	37.68
Non-repeat CDS	orf19.3001	603	34.16
Non-repeat CDS	orf19.3002	771	36.32
Non-repeat CDS	orf19.3003	4254	37.73
Non-repeat CDS	orf19.3003.1	531	38.61
Non-repeat CDS	orf19.3004	1233	33.33
Non-repeat CDS	orf19.3006	1755	35.95
Non-repeat CDS	orf19.3007	477	33.96
Non-repeat CDS	orf19.3007.2	666	36.19
Non-repeat CDS	orf19.3008	972	35.39
Non-repeat CDS	orf19.3009	1968	30.08
Non-repeat CDS	orf19.3010	864	33.22
Non-repeat CDS	orf19.3010.1	1272	38.92
Non-repeat CDS	orf19.3012	3198	38.59
Non-repeat CDS	orf19.3013	1194	35.85
Non-repeat CDS	orf19.3014	795	39.5
Non-repeat CDS	orf19.3015	1695	37.11
Non-repeat CDS	orf19.3016	426	38.03
Non-repeat CDS	orf19.3018	1221	36.45
Non-repeat CDS	orf19.3019	2037	39.18
Non-repeat CDS	orf19.3021	1131	38.28
Non-repeat CDS	orf19.3022	933	37.51
Non-repeat CDS	orf19.3023	1884	38.85
Non-repeat CDS	orf19.3026	1404	39.89
Non-repeat CDS	orf19.3027	1137	35.8
Non-repeat CDS	orf19.3029	1509	35.59
Non-repeat CDS	orf19.3030	1590	37.04
Non-repeat CDS	orf19.3031	882	38.1
Non-repeat CDS	orf19.3034	1869	37.72
Non-repeat CDS	orf19.3035	4233	38.6
Non-repeat CDS	orf19.3037	1890	39.05
Non-repeat CDS	orf19.3038	2667	38.77
Non-repeat CDS	orf19.3040	1278	37.32
Non-repeat CDS	orf19.3041	1950	36.05
Non-repeat CDS	orf19.3042	825	29.82
Non-repeat CDS	orf19.3043	1056	38.26
Non-repeat CDS	orf19.3045	1437	38.34
Non-repeat CDS	orf19.3047	3630	35.48
Non-repeat CDS	orf19.3048	2973	38.11
Non-repeat CDS	orf19.3049	1410	35.46
Non-repeat CDS	orf19.3050	2877	33.37
Non-repeat CDS	orf19.3051	882	37.41
Non-repeat CDS	orf19.3052	624	36.38
Non-repeat CDS	orf19.3053	546	37.55
Non-repeat CDS	orf19.3054	1446	35.06
Non-repeat CDS	orf19.3055	1698	33.39
Non-repeat CDS	orf19.3057	408	37.25
Non-repeat CDS	orf19.3058	1443	39.36
Non-repeat CDS	orf19.3059	1035	40.39
Non-repeat CDS	orf19.3059.1	99	31.31
Non-repeat CDS	orf19.3060	828	34.3
Non-repeat CDS	orf19.3061.1	393	34.1
Non-repeat CDS	orf19.3062	3540	33.33
Non-repeat CDS	orf19.3063	714	37.68
Non-repeat CDS	orf19.3064	507	37.67
Non-repeat CDS	orf19.3064.1	240	38.75
Non-repeat CDS	orf19.3065	1086	37.29
Non-repeat CDS	orf19.3066	3438	37.23
Non-repeat CDS	orf19.3288	2934	39.13
Non-repeat CDS	orf19.3289	1092	39.19
Non-repeat CDS	orf19.3290	471	39.28
Non-repeat CDS	orf19.3291	1020	35.98
Non-repeat CDS	orf19.3292	444	40.99
Non-repeat CDS	orf19.3293	939	34.08
Non-repeat CDS	orf19.3294	456	38.38
Non-repeat CDS	orf19.3295	1425	35.79
Non-repeat CDS	orf19.3296	1506	35.79
Non-repeat CDS	orf19.3297	309	33.01
Non-repeat CDS	orf19.3298	6765	34.77
Non-repeat CDS	orf19.3300	1530	33.79
Non-repeat CDS	orf19.3301	2208	34.1
Non-repeat CDS	orf19.3302	2103	35.66
Non-repeat CDS	orf19.3303	2070	33.82
Non-repeat CDS	orf19.3304	813	33.21
Non-repeat CDS	orf19.3305	2217	35
Non-repeat CDS	orf19.3306	1824	35.25
Non-repeat CDS	orf19.3307	1392	37
Non-repeat CDS	orf19.3308	1923	35.36
Non-repeat CDS	orf19.3309	1248	37.9
Non-repeat CDS	orf19.3310	753	40.64
Non-repeat CDS	orf19.3311	1050	36.48
Non-repeat CDS	orf19.3312	1875	35.73
Non-repeat CDS	orf19.3314	453	32.01
Non-repeat CDS	orf19.3315	1284	34.5
Non-repeat CDS	orf19.3317	348	27.3
Non-repeat CDS	orf19.3318	2274	36.15
Non-repeat CDS	orf19.3319	984	33.84
Non-repeat CDS	orf19.3320	354	38.42
Non-repeat CDS	orf19.3321	1527	35.95
Non-repeat CDS	orf19.3322	480	38.75
Non-repeat CDS	orf19.3323	867	32.64
Non-repeat CDS	orf19.3324	1194	37.35
Non-repeat CDS	orf19.3325	1983	38.98
Non-repeat CDS	orf19.3325.1	264	37.88
Non-repeat CDS	orf19.3327	1656	34.6
Non-repeat CDS	orf19.3328	1824	39.25
Non-repeat CDS	orf19.3329	1476	38.28
Non-repeat CDS	orf19.3330	1041	39.39
Non-repeat CDS	orf19.3330.3	399	39.1
Non-repeat CDS	orf19.3331	1701	37.1
Non-repeat CDS	orf19.3332	2979	37.87
Non-repeat CDS	orf19.3333	1296	38.43
Non-repeat CDS	orf19.3334	750	42.4
Non-repeat CDS	orf19.3335	603	38.31
Non-repeat CDS	orf19.3336	459	34.2
Non-repeat CDS	orf19.3337	2153	36.09
Non-repeat CDS	orf19.3340	705	37.02
Non-repeat CDS	orf19.3341	1869	35.05
Non-repeat CDS	orf19.3342	1851	34.79
Non-repeat CDS	orf19.3344	1560	35.45
Non-repeat CDS	orf19.3345	4638	39.2
Non-repeat CDS	orf19.3347	522	36.78
Non-repeat CDS	orf19.3348	531	35.97
Non-repeat CDS	orf19.3349	3705	36.68
Non-repeat CDS	orf19.3350	882	31.86
Non-repeat CDS	orf19.3351	876	28.54
Non-repeat CDS	orf19.3352	999	31.13
Non-repeat CDS	orf19.3353	684	33.92
Non-repeat CDS	orf19.3355	1383	32.39
Non-repeat CDS	orf19.3356	4797	28.75
Non-repeat CDS	orf19.3357	513	32.94
Non-repeat CDS	orf19.3358	972	41.05
Non-repeat CDS	orf19.3359	3201	30.68
Non-repeat CDS	orf19.3360	2004	29.89
Non-repeat CDS	orf19.3661	2475	33.37
Non-repeat CDS	orf19.3663	2583	34.38
Non-repeat CDS	orf19.3663.1	267	38.58
Non-repeat CDS	orf19.3665	1140	33.86
Non-repeat CDS	orf19.3666	1488	32.53
Non-repeat CDS	orf19.3667	1617	33.09
Non-repeat CDS	orf19.3669	1788	31.94
Non-repeat CDS	orf19.3670	1548	33.53
Non-repeat CDS	orf19.3671	345	35.07
Non-repeat CDS	orf19.3672	2028	34.27
Non-repeat CDS	orf19.3673	507	34.12
Non-repeat CDS	orf19.3674	963	32.29
Non-repeat CDS	orf19.3675	1161	31.7
Non-repeat CDS	orf19.3676	939	29.29
Non-repeat CDS	orf19.3677	837	31.18
Non-repeat CDS	orf19.3678	1716	33.68
Non-repeat CDS	orf19.3679	1011	31.26
Non-repeat CDS	orf19.3680	2013	30.25
Non-repeat CDS	orf19.3681	2628	33.83
Non-repeat CDS	orf19.3682	726	27.13
Non-repeat CDS	orf19.3683	1140	30.35
Non-repeat CDS	orf19.3684	879	35.49
Non-repeat CDS	orf19.3685	2943	27.76
Non-repeat CDS	orf19.3686	1212	28.14
Non-repeat CDS	orf19.3687	366	24.59
Non-repeat CDS	orf19.3688	366	31.97
Non-repeat CDS	orf19.3689	1632	31.19
Non-repeat CDS	orf19.3690.2	384	30.73
Non-repeat CDS	orf19.3691	807	30.36
Non-repeat CDS	orf19.3693	1926	30.37
Non-repeat CDS	orf19.3694	3633	27.53
Non-repeat CDS	orf19.3755	663	30.02
Non-repeat CDS	orf19.3756	1923	30.58
Non-repeat CDS	orf19.3757	345	31.59
Non-repeat CDS	orf19.3758	1428	32.21
Non-repeat CDS	orf19.3759	1341	32.89
Non-repeat CDS	orf19.3760	975	36.21
Non-repeat CDS	orf19.3761	2739	33.7
Non-repeat CDS	orf19.3762	537	24.39
Non-repeat CDS	orf19.3763	1380	26.96
Non-repeat CDS	orf19.3764	2280	25.75
Non-repeat CDS	orf19.3765	4182	30.63
Non-repeat CDS	orf19.3767	4020	32.59
Non-repeat CDS	orf19.384	1677	39.59
Non-repeat CDS	orf19.385	3000	37.67
Non-repeat CDS	orf19.386	936	39.1
Non-repeat CDS	orf19.387	2661	33.37
Non-repeat CDS	orf19.388	963	38.11
Non-repeat CDS	orf19.389	372	35.75
Non-repeat CDS	orf19.390	576	37.67
Non-repeat CDS	orf19.391	2139	40.63
Non-repeat CDS	orf19.392	435	38.62
Non-repeat CDS	orf19.393	528	39.77
Non-repeat CDS	orf19.394	1386	36.58
Non-repeat CDS	orf19.395	1323	42.78
Non-repeat CDS	orf19.396	636	38.68
Non-repeat CDS	orf19.397	444	36.49
Non-repeat CDS	orf19.398	474	40.72
Non-repeat CDS	orf19.399	2139	38.43
Non-repeat CDS	orf19.400	738	36.18
Non-repeat CDS	orf19.401	1665	37.42
Non-repeat CDS	orf19.403	765	31.11
Non-repeat CDS	orf19.405	1251	39.25
Non-repeat CDS	orf19.4056	1272	40.25
Non-repeat CDS	orf19.4057	441	31.52
Non-repeat CDS	orf19.4059	1281	34.97
Non-repeat CDS	orf19.406	1491	36.89
Non-repeat CDS	orf19.4060	1113	38.19
Non-repeat CDS	orf19.4061	804	32.21
Non-repeat CDS	orf19.4062	1116	36.83
Non-repeat CDS	orf19.4063	1728	38.48
Non-repeat CDS	orf19.4064	2658	32.58
Non-repeat CDS	orf19.407	2199	38.34
Non-repeat CDS	orf19.409	642	36.14
Non-repeat CDS	orf19.410.3	621	33.33
Non-repeat CDS	orf19.411	1020	32.65
Non-repeat CDS	orf19.412	1500	28.93
Non-repeat CDS	orf19.413	2076	33
Non-repeat CDS	orf19.413.1	249	28.51
Non-repeat CDS	orf19.414	2274	33.42
Non-repeat CDS	orf19.415	747	35.88
Non-repeat CDS	orf19.416	1122	37.7
Non-repeat CDS	orf19.417	1050	37.43
Non-repeat CDS	orf19.418	4299	36.68
Non-repeat CDS	orf19.419	1758	36.63
Non-repeat CDS	orf19.420	495	36.36
Non-repeat CDS	orf19.422	2256	40.43
Non-repeat CDS	orf19.423	558	35.48
Non-repeat CDS	orf19.424	555	39.28
Non-repeat CDS	orf19.425	594	36.2
Non-repeat CDS	orf19.426	2055	33.87
Non-repeat CDS	orf19.427	4998	35.55
Non-repeat CDS	orf19.428	2184	36.31
Non-repeat CDS	orf19.429	1812	37.42
Non-repeat CDS	orf19.430	660	37.88
Non-repeat CDS	orf19.431	2328	39.13
Non-repeat CDS	orf19.432	1377	36.75
Non-repeat CDS	orf19.433	1743	35.4
Non-repeat CDS	orf19.434	2109	34.8
Non-repeat CDS	orf19.437	1959	37.31
Non-repeat CDS	orf19.438	1749	34.99
Non-repeat CDS	orf19.439	720	38.47
Non-repeat CDS	orf19.440	1917	41.52
Non-repeat CDS	orf19.441	1335	39.48
Non-repeat CDS	orf19.442	615	41.46
Non-repeat CDS	orf19.4423	3222	37.18
Non-repeat CDS	orf19.4424	972	38.89
Non-repeat CDS	orf19.4426	1392	31.11
Non-repeat CDS	orf19.4427	495	33.74
Non-repeat CDS	orf19.4428	1440	31.46
Non-repeat CDS	orf19.443	588	32.31
Non-repeat CDS	orf19.4430	1641	34
Non-repeat CDS	orf19.4432	2853	35.4
Non-repeat CDS	orf19.4433	1971	38.51
Non-repeat CDS	orf19.4435	3912	35.97
Non-repeat CDS	orf19.4436	516	34.5
Non-repeat CDS	orf19.4437	3054	35.79
Non-repeat CDS	orf19.4438	1524	38.39
Non-repeat CDS	orf19.4439	444	34.23
Non-repeat CDS	orf19.4439.1	210	33.33
Non-repeat CDS	orf19.444	438	36.76
Non-repeat CDS	orf19.4440	2520	35.56
Non-repeat CDS	orf19.4441	1797	38.68
Non-repeat CDS	orf19.4442	1683	37.55
Non-repeat CDS	orf19.4443	555	37.12
Non-repeat CDS	orf19.4444	927	35.92
Non-repeat CDS	orf19.4445	1629	32.29
Non-repeat CDS	orf19.4446	1743	39.3
Non-repeat CDS	orf19.4447	900	39.89
Non-repeat CDS	orf19.4448	2466	39.46
Non-repeat CDS	orf19.4449	747	39.63
Non-repeat CDS	orf19.445	1158	36.18
Non-repeat CDS	orf19.4450	1701	39.15
Non-repeat CDS	orf19.4450.1	207	36.71
Non-repeat CDS	orf19.4450.2	243	33.74
Non-repeat CDS	orf19.4451	3135	38.12
Non-repeat CDS	orf19.4455	1806	36.88
Non-repeat CDS	orf19.4456	1824	39.86
Non-repeat CDS	orf19.4457	4968	31.84
Non-repeat CDS	orf19.4459	1692	29.67
Non-repeat CDS	orf19.446	894	35.46
Non-repeat CDS	orf19.446.1	231	32.47
Non-repeat CDS	orf19.446.2	234	32.91
Non-repeat CDS	orf19.4461	363	36.64
Non-repeat CDS	orf19.4464	516	28.1
Non-repeat CDS	orf19.4465	2052	27.88
Non-repeat CDS	orf19.4466	1545	28.09
Non-repeat CDS	orf19.4467	1509	27.04
Non-repeat CDS	orf19.4468	510	31.57
Non-repeat CDS	orf19.4470	540	24.44
Non-repeat CDS	orf19.4471	2610	28.01
Non-repeat CDS	orf19.4472	318	34.59
Non-repeat CDS	orf19.4473	528	24.43
Non-repeat CDS	orf19.4474	927	27.4
Non-repeat CDS	orf19.4475	1443	27.44
Non-repeat CDS	orf19.4477	1014	37.57
Non-repeat CDS	orf19.4478	2097	33.71
Non-repeat CDS	orf19.4479	2163	32.04
Non-repeat CDS	orf19.448	1281	38.41
Non-repeat CDS	orf19.4481	432	37.5
Non-repeat CDS	orf19.449	1197	35.51
Non-repeat CDS	orf19.450	234	29.06
Non-repeat CDS	orf19.4522	444	36.49
Non-repeat CDS	orf19.4523	624	33.09
Non-repeat CDS	orf19.4524	2106	31.77
Non-repeat CDS	orf19.4525	1005	34.23
Non-repeat CDS	orf19.4528	546	31.5
Non-repeat CDS	orf19.4528.1	279	38.35
Non-repeat CDS	orf19.4529	507	31.56
Non-repeat CDS	orf19.4530.1	1101	37.97
Non-repeat CDS	orf19.4531	3825	35.14
Non-repeat CDS	orf19.4532	1065	34.08
Non-repeat CDS	orf19.4533	1518	34.78
Non-repeat CDS	orf19.4534	1530	37.19
Non-repeat CDS	orf19.4535	2328	35.7
Non-repeat CDS	orf19.4536	1491	36.02
Non-repeat CDS	orf19.4537	918	38.24
Non-repeat CDS	orf19.4538	831	34.9
Non-repeat CDS	orf19.4539	555	38.92
Non-repeat CDS	orf19.4540	573	36.82
Non-repeat CDS	orf19.4542	1188	34.51
Non-repeat CDS	orf19.4543	1530	38.56
Non-repeat CDS	orf19.4544	720	31.67
Non-repeat CDS	orf19.4545	3060	37.29
Non-repeat CDS	orf19.4546	1875	38.03
Non-repeat CDS	orf19.4548	1131	31.74
Non-repeat CDS	orf19.4549	2136	35.53
Non-repeat CDS	orf19.4550	1902	35.12
Non-repeat CDS	orf19.4551	2388	31.09
Non-repeat CDS	orf19.4712	1539	36.58
Non-repeat CDS	orf19.4713	2577	32.17
Non-repeat CDS	orf19.4720	489	38.65
Non-repeat CDS	orf19.4721	1338	34.75
Non-repeat CDS	orf19.4722	825	37.21
Non-repeat CDS	orf19.4723	852	34.86
Non-repeat CDS	orf19.4724	771	34.63
Non-repeat CDS	orf19.4725	2190	34.57
Non-repeat CDS	orf19.4726	576	36.46
Non-repeat CDS	orf19.4727	468	34.62
Non-repeat CDS	orf19.4728	4143	37.7
Non-repeat CDS	orf19.4730	723	34.58
Non-repeat CDS	orf19.4731	1176	34.27
Non-repeat CDS	orf19.4732	2787	40.69
Non-repeat CDS	orf19.4733	909	39.27
Non-repeat CDS	orf19.4734	1050	33.71
Non-repeat CDS	orf19.4735	1053	36.09
Non-repeat CDS	orf19.4736	1656	38.16
Non-repeat CDS	orf19.4737	1758	36.97
Non-repeat CDS	orf19.4738	1677	34.59
Non-repeat CDS	orf19.4739	2007	34.78
Non-repeat CDS	orf19.4740	633	36.65
Non-repeat CDS	orf19.4741	447	35.79
Non-repeat CDS	orf19.4742	1065	34.37
Non-repeat CDS	orf19.4743	2067	35.22
Non-repeat CDS	orf19.4744	2208	36.55
Non-repeat CDS	orf19.4746	1629	36.03
Non-repeat CDS	orf19.4747	1596	30.51
Non-repeat CDS	orf19.4748	396	28.03
Non-repeat CDS	orf19.4749	1677	35
Non-repeat CDS	orf19.4750	2103	26.82
Non-repeat CDS	orf19.4751	888	27.14
Non-repeat CDS	orf19.4751.1	225	32.44
Non-repeat CDS	orf19.4752	2277	33.9
Non-repeat CDS	orf19.4753	3441	33.1
Non-repeat CDS	orf19.4754	1524	29
Non-repeat CDS	orf19.4755	2811	32.84
Non-repeat CDS	orf19.4756	1653	30.13
Non-repeat CDS	orf19.4757	1830	31.53
Non-repeat CDS	orf19.4758	741	31.44
Non-repeat CDS	orf19.4759	498	33.33
Non-repeat CDS	orf19.4760	1464	26.57
Non-repeat CDS	orf19.4761	1974	30.34
Non-repeat CDS	orf19.4763	681	24.08
Non-repeat CDS	orf19.4764	3573	27.09
Non-repeat CDS	orf19.4765	660	39.55
Non-repeat CDS	orf19.4766	3303	30.21
Non-repeat CDS	orf19.4767	741	34.28
Non-repeat CDS	orf19.4768	1596	24.31
Non-repeat CDS	orf19.4769	1545	31.65
Non-repeat CDS	orf19.4771	2121	29.84
Non-repeat CDS	orf19.4772	1164	32.56
Non-repeat CDS	orf19.4773	1098	34.88
Non-repeat CDS	orf19.4774	1140	36.05
Non-repeat CDS	orf19.4775	2286	37.18
Non-repeat CDS	orf19.4776	2631	37.02
Non-repeat CDS	orf19.4777	1788	34.56
Non-repeat CDS	orf19.4778	2070	34.93
Non-repeat CDS	orf19.4779	1863	35.8
Non-repeat CDS	orf19.4780	1374	38.14
Non-repeat CDS	orf19.4781	1014	34.91
Non-repeat CDS	orf19.4783	1425	35.72
Non-repeat CDS	orf19.4784	3594	37.09
Non-repeat CDS	orf19.4785	1128	41.22
Non-repeat CDS	orf19.4786	1665	33.81
Non-repeat CDS	orf19.4787	2193	38.3
Non-repeat CDS	orf19.4788	2574	36.13
Non-repeat CDS	orf19.4789	894	38.14
Non-repeat CDS	orf19.4791	2931	30.91
Non-repeat CDS	orf19.4792	1674	36.98
Non-repeat CDS	orf19.4793	600	29.67
Non-repeat CDS	orf19.4795	3501	32.93
Non-repeat CDS	orf19.4796	531	35.59
Non-repeat CDS	orf19.4798	2877	34.38
Non-repeat CDS	orf19.4799	1833	36.28
Non-repeat CDS	orf19.48	4182	27.68
Non-repeat CDS	orf19.4800	2358	32.78
Non-repeat CDS	orf19.4801	1398	34.05
Non-repeat CDS	orf19.4802	1275	35.61
Non-repeat CDS	orf19.4803	378	31.75
Non-repeat CDS	orf19.4804	1401	38.97
Non-repeat CDS	orf19.4805	2601	36.68
Non-repeat CDS	orf19.4807	975	34.36
Non-repeat CDS	orf19.4808	4929	33.6
Non-repeat CDS	orf19.4809	1296	38.19
Non-repeat CDS	orf19.4811	987	38.2
Non-repeat CDS	orf19.4812	408	39.46
Non-repeat CDS	orf19.4813	1593	38.1
Non-repeat CDS	orf19.4814	336	36.31
Non-repeat CDS	orf19.4815	1401	37.47
Non-repeat CDS	orf19.4816	1350	35.33
Non-repeat CDS	orf19.4817	921	32.03
Non-repeat CDS	orf19.4818	1584	37.94
Non-repeat CDS	orf19.4819	357	23.53
Non-repeat CDS	orf19.4820	1623	34.44
Non-repeat CDS	orf19.4822	1398	38.84
Non-repeat CDS	orf19.4825	465	30.97
Non-repeat CDS	orf19.4826	1095	38.72
Non-repeat CDS	orf19.4827	1287	38.62
Non-repeat CDS	orf19.4828	1530	36.99
Non-repeat CDS	orf19.4829	2286	37.66
Non-repeat CDS	orf19.4830	333	34.53
Non-repeat CDS	orf19.4831	1542	37.81
Non-repeat CDS	orf19.4833	1656	40.22
Non-repeat CDS	orf19.4834	705	31.35
Non-repeat CDS	orf19.4835	1584	38.57
Non-repeat CDS	orf19.4836	1335	38.65
Non-repeat CDS	orf19.4837	834	38.25
Non-repeat CDS	orf19.4837.1	219	33.33
Non-repeat CDS	orf19.4839	897	39.69
Non-repeat CDS	orf19.4841	1080	37.69
Non-repeat CDS	orf19.4842	342	35.96
Non-repeat CDS	orf19.4843	2196	34.93
Non-repeat CDS	orf19.4844	1146	40.84
Non-repeat CDS	orf19.4845	522	34.48
Non-repeat CDS	orf19.4846	1242	40.34
Non-repeat CDS	orf19.4847	453	42.38
Non-repeat CDS	orf19.4848	4203	36.16
Non-repeat CDS	orf19.4849	984	33.13
Non-repeat CDS	orf19.4850	1851	31.6
Non-repeat CDS	orf19.4851	1185	37.64
Non-repeat CDS	orf19.4853	1740	38.56
Non-repeat CDS	orf19.4855	453	33.11
Non-repeat CDS	orf19.4858	2886	35.79
Non-repeat CDS	orf19.4861	813	32.23
Non-repeat CDS	orf19.4861.1	285	31.23
Non-repeat CDS	orf19.4862	597	34.67
Non-repeat CDS	orf19.4862.2	324	32.72
Non-repeat CDS	orf19.4863	2511	35.88
Non-repeat CDS	orf19.4864	915	30.27
Non-repeat CDS	orf19.4865	1857	28.27
Non-repeat CDS	orf19.4866	1794	35.28
Non-repeat CDS	orf19.4867	3537	36.05
Non-repeat CDS	orf19.4869	1554	41.12
Non-repeat CDS	orf19.4870	1695	32.86
Non-repeat CDS	orf19.4871	1743	33.16
Non-repeat CDS	orf19.4872	852	26.17
Non-repeat CDS	orf19.4873	513	31.58
Non-repeat CDS	orf19.4874	1821	32.18
Non-repeat CDS	orf19.4875	489	34.15
Non-repeat CDS	orf19.4878	2547	39.5
Non-repeat CDS	orf19.4879.2	375	34.93
Non-repeat CDS	orf19.4880	2169	36.51
Non-repeat CDS	orf19.4882	855	36.49
Non-repeat CDS	orf19.4883	2232	34.63
Non-repeat CDS	orf19.4884	2358	38.63
Non-repeat CDS	orf19.4885	924	40.04
Non-repeat CDS	orf19.4886	717	29.43
Non-repeat CDS	orf19.4887	2190	33.88
Non-repeat CDS	orf19.4888	834	33.81
Non-repeat CDS	orf19.4889	1755	32.99
Non-repeat CDS	orf19.4890	2931	33.71
Non-repeat CDS	orf19.4892	1218	30.71
Non-repeat CDS	orf19.4893	4326	33.03
Non-repeat CDS	orf19.4894	735	39.32
Non-repeat CDS	orf19.4895	822	36.74
Non-repeat CDS	orf19.4896	723	35.68
Non-repeat CDS	orf19.4897	963	33.85
Non-repeat CDS	orf19.4898	690	37.83
Non-repeat CDS	orf19.4900	2487	27.91
Non-repeat CDS	orf19.4901	1035	29.47
Non-repeat CDS	orf19.4903	1062	24.67
Non-repeat CDS	orf19.4904	1341	29.6
Non-repeat CDS	orf19.4904.1	321	35.51
Non-repeat CDS	orf19.4905	1554	32.95
Non-repeat CDS	orf19.4906	2307	39.84
Non-repeat CDS	orf19.4907	1818	33.06
Non-repeat CDS	orf19.4908	336	35.42
Non-repeat CDS	orf19.4909	2199	36.88
Non-repeat CDS	orf19.4910	753	39.04
Non-repeat CDS	orf19.4911	963	37.07
Non-repeat CDS	orf19.4912	1935	40.52
Non-repeat CDS	orf19.4913	3630	28.93
Non-repeat CDS	orf19.4914	354	29.38
Non-repeat CDS	orf19.4914.1	234	32.05
Non-repeat CDS	orf19.4917	648	35.03
Non-repeat CDS	orf19.4918	1560	34.55
Non-repeat CDS	orf19.4919	1311	34.86
Non-repeat CDS	orf19.4921.1	165	30.91
Non-repeat CDS	orf19.4922	837	31.9
Non-repeat CDS	orf19.4923	1557	33.78
Non-repeat CDS	orf19.4923.1	213	28.64
Non-repeat CDS	orf19.4924	3954	33.21
Non-repeat CDS	orf19.4927	5199	36.22
Non-repeat CDS	orf19.4928	2256	31.6
Non-repeat CDS	orf19.4929	3525	33.79
Non-repeat CDS	orf19.4930	579	33.51
Non-repeat CDS	orf19.4931	2346	34.87
Non-repeat CDS	orf19.4931.1	396	36.36
Non-repeat CDS	orf19.4932	2286	38.06
Non-repeat CDS	orf19.4933	1302	35.71
Non-repeat CDS	orf19.4934	1212	40.76
Non-repeat CDS	orf19.4936	396	30.81
Non-repeat CDS	orf19.4936.1	216	32.41
Non-repeat CDS	orf19.4937	3642	35.75
Non-repeat CDS	orf19.4939	4905	30.03
Non-repeat CDS	orf19.4940	1680	36.67
Non-repeat CDS	orf19.4941	810	34.94
Non-repeat CDS	orf19.4942	369	38.75
Non-repeat CDS	orf19.4943	1377	34.2
Non-repeat CDS	orf19.4945	3645	36.9
Non-repeat CDS	orf19.4946	762	34.51
Non-repeat CDS	orf19.4947	510	32.94
Non-repeat CDS	orf19.4948	1215	31.44
Non-repeat CDS	orf19.4950	2442	30.96
Non-repeat CDS	orf19.4951	1269	27.97
Non-repeat CDS	orf19.4952	939	33.44
Non-repeat CDS	orf19.4952.1	456	32.24
Non-repeat CDS	orf19.4953	897	28.54
Non-repeat CDS	orf19.4954	591	33.33
Non-repeat CDS	orf19.4955	1527	26.39
Non-repeat CDS	orf19.4956	2985	33.5
Non-repeat CDS	orf19.4958	1869	26.32
Non-repeat CDS	orf19.4959	1722	36.76
Non-repeat CDS	orf19.4960	1035	29.66
Non-repeat CDS	orf19.4961	1755	33.05
Non-repeat CDS	orf19.4962	1128	25.62
Non-repeat CDS	orf19.4963	1197	25.81
Non-repeat CDS	orf19.4964	846	28.37
Non-repeat CDS	orf19.4965	2091	25.87
Non-repeat CDS	orf19.4966	2196	28.69
Non-repeat CDS	orf19.4967	399	32.58
Non-repeat CDS	orf19.4969	4512	30.45
Non-repeat CDS	orf19.4970	1728	32.35
Non-repeat CDS	orf19.4972	1947	39.45
Non-repeat CDS	orf19.4975	2760	38.99
Non-repeat CDS	orf19.4976	357	25.77
Non-repeat CDS	orf19.4979	2001	30.23
Non-repeat CDS	orf19.4981	2115	28.37
Non-repeat CDS	orf19.4982	1629	28.3
Non-repeat CDS	orf19.4983	816	30.88
Non-repeat CDS	orf19.4984	1557	30.96
Non-repeat CDS	orf19.4985	1755	28.15
Non-repeat CDS	orf19.4987	1350	33.85
Non-repeat CDS	orf19.4988	1518	30.3
Non-repeat CDS	orf19.4991	2817	33.79
Non-repeat CDS	orf19.4993	2391	31.7
Non-repeat CDS	orf19.4995	1233	34.87
Non-repeat CDS	orf19.4996	897	27.76
Non-repeat CDS	orf19.4997	2238	35.21
Non-repeat CDS	orf19.4998	2976	31.99
Non-repeat CDS	orf19.50	1983	27.69
Non-repeat CDS	orf19.5000	1683	33.63
Non-repeat CDS	orf19.5001	1776	35.25
Non-repeat CDS	orf19.5003	1347	27.62
Non-repeat CDS	orf19.5004	2547	32.71
Non-repeat CDS	orf19.5005	1947	35.59
Non-repeat CDS	orf19.5006	534	34.64
Non-repeat CDS	orf19.5006.1	336	35.71
Non-repeat CDS	orf19.5007	1131	39.08
Non-repeat CDS	orf19.5008.1	300	27.33
Non-repeat CDS	orf19.5009	1917	32.71
Non-repeat CDS	orf19.5010	981	31.6
Non-repeat CDS	orf19.5011	2277	31.53
Non-repeat CDS	orf19.5012	597	29.98
Non-repeat CDS	orf19.5013	1635	30.89
Non-repeat CDS	orf19.5014	708	34.18
Non-repeat CDS	orf19.5015	4686	35.21
Non-repeat CDS	orf19.5016	366	31.15
Non-repeat CDS	orf19.5019	2085	37.6
Non-repeat CDS	orf19.5020	1023	39.1
Non-repeat CDS	orf19.5021	1254	37.08
Non-repeat CDS	orf19.5022	1956	38.34
Non-repeat CDS	orf19.5023	1530	34.71
Non-repeat CDS	orf19.5024	1488	40.26
Non-repeat CDS	orf19.5025	1584	33.59
Non-repeat CDS	orf19.5026	3534	36.79
Non-repeat CDS	orf19.5027	1710	35.61
Non-repeat CDS	orf19.5029	1638	31.93
Non-repeat CDS	orf19.5030	1080	34.17
Non-repeat CDS	orf19.5031	2025	38.07
Non-repeat CDS	orf19.5032	1119	41.73
Non-repeat CDS	orf19.5033	495	34.14
Non-repeat CDS	orf19.5034	1932	31.83
Non-repeat CDS	orf19.5035	1659	38.82
Non-repeat CDS	orf19.5049	930	31.18
Non-repeat CDS	orf19.5050	2088	34.87
Non-repeat CDS	orf19.5051	2271	36.28
Non-repeat CDS	orf19.5052	1161	34.19
Non-repeat CDS	orf19.5053	783	30.65
Non-repeat CDS	orf19.5054	903	32.45
Non-repeat CDS	orf19.5056	1440	31.67
Non-repeat CDS	orf19.5057	1254	30.94
Non-repeat CDS	orf19.5058	1863	33.87
Non-repeat CDS	orf19.5059	2319	30.23
Non-repeat CDS	orf19.5061	2409	34.66
Non-repeat CDS	orf19.5063	576	29.51
Non-repeat CDS	orf19.5064	1215	29.22
Non-repeat CDS	orf19.5064.1	192	32.81
Non-repeat CDS	orf19.5065	1404	25.21
Non-repeat CDS	orf19.5066	801	29.34
Non-repeat CDS	orf19.5067	699	27.18
Non-repeat CDS	orf19.5068	3675	32.52
Non-repeat CDS	orf19.5069	732	32.92
Non-repeat CDS	orf19.5070	1296	33.49
Non-repeat CDS	orf19.5071	2292	37.78
Non-repeat CDS	orf19.5073	720	35
Non-repeat CDS	orf19.5074	1875	35.84
Non-repeat CDS	orf19.5076	381	40.68
Non-repeat CDS	orf19.5076.1	225	38.67
Non-repeat CDS	orf19.5077	501	36.93
Non-repeat CDS	orf19.5078	408	36.27
Non-repeat CDS	orf19.5079	4473	39.39
Non-repeat CDS	orf19.5079.1	387	38.76
Non-repeat CDS	orf19.5081	3054	40.47
Non-repeat CDS	orf19.5083	1107	39.39
Non-repeat CDS	orf19.5085	3276	38.52
Non-repeat CDS	orf19.5087	2112	39.39
Non-repeat CDS	orf19.5089	2604	35.25
Non-repeat CDS	orf19.5090	981	38.33
Non-repeat CDS	orf19.5092	639	31.61
Non-repeat CDS	orf19.5093	1059	35.03
Non-repeat CDS	orf19.5094	2226	34.68
Non-repeat CDS	orf19.5095	3957	38.82
Non-repeat CDS	orf19.5097	3171	36.71
Non-repeat CDS	orf19.5098	963	38.11
Non-repeat CDS	orf19.51	4092	28.13
Non-repeat CDS	orf19.5100	4821	35.97
Non-repeat CDS	orf19.5101	2364	37.31
Non-repeat CDS	orf19.5102	2265	38.81
Non-repeat CDS	orf19.5103	993	37.97
Non-repeat CDS	orf19.5104	507	34.32
Non-repeat CDS	orf19.5105	3441	40.63
Non-repeat CDS	orf19.5106	2946	34.93
Non-repeat CDS	orf19.5107	1989	38.31
Non-repeat CDS	orf19.5110	1584	41.16
Non-repeat CDS	orf19.5112	2034	41.54
Non-repeat CDS	orf19.5114	474	35.86
Non-repeat CDS	orf19.5114.1	192	41.67
Non-repeat CDS	orf19.5117	1461	40.79
Non-repeat CDS	orf19.5118	1887	40.86
Non-repeat CDS	orf19.5194.1	762	38.98
Non-repeat CDS	orf19.5195	840	38.21
Non-repeat CDS	orf19.5196	534	39.14
Non-repeat CDS	orf19.5197	2775	37.84
Non-repeat CDS	orf19.5198	2226	36.12
Non-repeat CDS	orf19.52	1563	34.1
Non-repeat CDS	orf19.5200	945	37.25
Non-repeat CDS	orf19.5201	603	34.49
Non-repeat CDS	orf19.5201.1	252	33.73
Non-repeat CDS	orf19.5203	2370	38
Non-repeat CDS	orf19.5219	7932	33.17
Non-repeat CDS	orf19.5220	858	32.4
Non-repeat CDS	orf19.5221	2952	34.47
Non-repeat CDS	orf19.5223	399	34.84
Non-repeat CDS	orf19.5224	2835	33.9
Non-repeat CDS	orf19.5225	378	34.13
Non-repeat CDS	orf19.5225.2	411	35.28
Non-repeat CDS	orf19.5226	1275	33.25
Non-repeat CDS	orf19.5227	498	29.52
Non-repeat CDS	orf19.5228	624	33.33
Non-repeat CDS	orf19.5229	3015	30.88
Non-repeat CDS	orf19.5230	1011	32.64
Non-repeat CDS	orf19.5231	1236	31.55
Non-repeat CDS	orf19.5231.2	204	38.24
Non-repeat CDS	orf19.5232	879	27.3
Non-repeat CDS	orf19.5233	348	32.47
Non-repeat CDS	orf19.5234	2010	32.24
Non-repeat CDS	orf19.5235	699	21.46
Non-repeat CDS	orf19.5236	945	31.32
Non-repeat CDS	orf19.5237	642	32.24
Non-repeat CDS	orf19.5238	1818	36.74
Non-repeat CDS	orf19.5239	1416	29.66
Non-repeat CDS	orf19.5241	3006	36.53
Non-repeat CDS	orf19.5242	1446	27.42
Non-repeat CDS	orf19.5243	1563	29.56
Non-repeat CDS	orf19.5244	2916	29.94
Non-repeat CDS	orf19.5245	2169	32.87
Non-repeat CDS	orf19.5246	1167	35.99
Non-repeat CDS	orf19.5247	1281	35.05
Non-repeat CDS	orf19.5248	510	40.2
Non-repeat CDS	orf19.5249	609	35.47
Non-repeat CDS	orf19.5250	489	36.61
Non-repeat CDS	orf19.5251	2400	35.33
Non-repeat CDS	orf19.5253	2199	34.65
Non-repeat CDS	orf19.5254	381	29.4
Non-repeat CDS	orf19.5255	2004	34.33
Non-repeat CDS	orf19.5256	1356	30.6
Non-repeat CDS	orf19.5257	1593	36.91
Non-repeat CDS	orf19.5258	1881	31.58
Non-repeat CDS	orf19.5259	720	33.89
Non-repeat CDS	orf19.5260	2859	36.59
Non-repeat CDS	orf19.5262	432	31.71
Non-repeat CDS	orf19.5263	1392	36.21
Non-repeat CDS	orf19.5264	426	29.34
Non-repeat CDS	orf19.5265	2715	35.43
Non-repeat CDS	orf19.5266	1380	28.91
Non-repeat CDS	orf19.5267	486	37.65
Non-repeat CDS	orf19.5268	513	32.36
Non-repeat CDS	orf19.5269	1392	35.85
Non-repeat CDS	orf19.5269.1	255	32.16
Non-repeat CDS	orf19.5270	1023	30.69
Non-repeat CDS	orf19.5271	1746	31.96
Non-repeat CDS	orf19.5274	3066	39.33
Non-repeat CDS	orf19.5275	1224	31.94
Non-repeat CDS	orf19.5276	1248	25.8
Non-repeat CDS	orf19.5277	1224	33.17
Non-repeat CDS	orf19.5278	1029	33.04
Non-repeat CDS	orf19.5279	423	32.15
Non-repeat CDS	orf19.5280	1662	38.57
Non-repeat CDS	orf19.5281	3663	36.09
Non-repeat CDS	orf19.5282	1443	35.14
Non-repeat CDS	orf19.53	1134	35.1
Non-repeat CDS	orf19.54	1965	30.28
Non-repeat CDS	orf19.55	975	28.92
Non-repeat CDS	orf19.56	1743	30.81
Non-repeat CDS	orf19.57	612	32.52
Non-repeat CDS	orf19.58	2361	34.43
Non-repeat CDS	orf19.59	1146	33.68
Non-repeat CDS	orf19.6008.3	459	36.17
Non-repeat CDS	orf19.6008.4	270	35.93
Non-repeat CDS	orf19.6009	3123	36.63
Non-repeat CDS	orf19.6010	1962	36.95
Non-repeat CDS	orf19.6010.1	375	33.33
Non-repeat CDS	orf19.6011	4236	37.42
Non-repeat CDS	orf19.6012	3837	33.46
Non-repeat CDS	orf19.6013	759	32.81
Non-repeat CDS	orf19.6014	618	31.07
Non-repeat CDS	orf19.6016	2151	31.89
Non-repeat CDS	orf19.6017	1626	35.61
Non-repeat CDS	orf19.6018	2097	34.93
Non-repeat CDS	orf19.6020	1002	30.04
Non-repeat CDS	orf19.6021	747	34
Non-repeat CDS	orf19.6022	1731	32.35
Non-repeat CDS	orf19.6023	1800	32.89
Non-repeat CDS	orf19.6024	1047	21.49
Non-repeat CDS	orf19.6025	882	26.08
Non-repeat CDS	orf19.6026	654	31.35
Non-repeat CDS	orf19.6027	1101	29.34
Non-repeat CDS	orf19.6028	2358	29.01
Non-repeat CDS	orf19.6029	783	30.01
Non-repeat CDS	orf19.6030	660	36.36
Non-repeat CDS	orf19.6031	2526	32.58
Non-repeat CDS	orf19.6032	1422	29.32
Non-repeat CDS	orf19.6033	1830	31.91
Non-repeat CDS	orf19.6034	1350	35.48
Non-repeat CDS	orf19.6035	366	25.96
Non-repeat CDS	orf19.6036	3042	28.17
Non-repeat CDS	orf19.6037	2124	35.4
Non-repeat CDS	orf19.6038	1752	35.56
Non-repeat CDS	orf19.6039	1014	35.01
Non-repeat CDS	orf19.6040	681	36.27
Non-repeat CDS	orf19.6041	3903	36.56
Non-repeat CDS	orf19.6043	1746	39.12
Non-repeat CDS	orf19.6044	942	38.75
Non-repeat CDS	orf19.6045	1773	38.24
Non-repeat CDS	orf19.6046	4608	38.24
Non-repeat CDS	orf19.6047	1281	40.83
Non-repeat CDS	orf19.6048	930	37.96
Non-repeat CDS	orf19.6049	2385	40
Non-repeat CDS	orf19.6052	1173	35.72
Non-repeat CDS	orf19.6053	1911	38.36
Non-repeat CDS	orf19.6054	2169	36.05
Non-repeat CDS	orf19.6055	2442	37.59
Non-repeat CDS	orf19.6056	669	35.72
Non-repeat CDS	orf19.6057	930	38.06
Non-repeat CDS	orf19.6058	1029	36.35
Non-repeat CDS	orf19.6059	360	36.11
Non-repeat CDS	orf19.6060	2256	38.12
Non-repeat CDS	orf19.6061	1326	36.27
Non-repeat CDS	orf19.6062	321	38.32
Non-repeat CDS	orf19.6062.3	453	36.42
Non-repeat CDS	orf19.6063	1437	34.93
Non-repeat CDS	orf19.6064	1677	37.27
Non-repeat CDS	orf19.6065	972	34.47
Non-repeat CDS	orf19.6066	1629	35.85
Non-repeat CDS	orf19.6068	1149	36.64
Non-repeat CDS	orf19.6071	2238	32.8
Non-repeat CDS	orf19.6072	1344	37.28
Non-repeat CDS	orf19.6072.1	285	31.93
Non-repeat CDS	orf19.6073	876	36.99
Non-repeat CDS	orf19.6074	747	38.02
Non-repeat CDS	orf19.6075	549	39.34
Non-repeat CDS	orf19.6076	786	39.44
Non-repeat CDS	orf19.6077	1557	39.82
Non-repeat CDS	orf19.6078	1962	36.29
Non-repeat CDS	orf19.6078.1	198	39.9
Non-repeat CDS	orf19.6079	900	39.89
Non-repeat CDS	orf19.6080	1287	39.7
Non-repeat CDS	orf19.6081	1635	41.1
Non-repeat CDS	orf19.6082	1155	38.35
Non-repeat CDS	orf19.6083	348	31.9
Non-repeat CDS	orf19.6084	639	35.68
Non-repeat CDS	orf19.6085	603	38.47
Non-repeat CDS	orf19.6086	1740	40.92
Non-repeat CDS	orf19.6090	1203	40.9
Non-repeat CDS	orf19.6091	1869	41.79
Non-repeat CDS	orf19.6092	3057	42.69
Non-repeat CDS	orf19.6094	2100	41.52
Non-repeat CDS	orf19.6096	681	44.49
Non-repeat CDS	orf19.6099	1623	46.46
Non-repeat CDS	orf19.6100	729	44.31
Non-repeat CDS	orf19.6102	852	45.42
Non-repeat CDS	orf19.6103	522	45.02
Non-repeat CDS	orf19.6105	1089	48.39
Non-repeat CDS	orf19.6109	1539	48.54
Non-repeat CDS	orf19.6110	348	35.06
Non-repeat CDS	orf19.6112	768	42.97
Non-repeat CDS	orf19.6113	312	47.76
Non-repeat CDS	orf19.6114	312	50
Non-repeat CDS	orf19.6115	339	38.64
Non-repeat CDS	orf19.6193	3786	36.58
Non-repeat CDS	orf19.6194	942	31
Non-repeat CDS	orf19.6195	2235	34.41
Non-repeat CDS	orf19.6196	567	37.74
Non-repeat CDS	orf19.6197	1650	37.52
Non-repeat CDS	orf19.6198.1	312	29.17
Non-repeat CDS	orf19.6199	2160	34.4
Non-repeat CDS	orf19.6200	954	39.52
Non-repeat CDS	orf19.6202	1077	44.24
Non-repeat CDS	orf19.6203	2937	37.59
Non-repeat CDS	orf19.6205	957	40.86
Non-repeat CDS	orf19.6208	2280	39.56
Non-repeat CDS	orf19.6209	1434	40.59
Non-repeat CDS	orf19.6211	1656	37.98
Non-repeat CDS	orf19.6213	903	38.54
Non-repeat CDS	orf19.6214	3237	39.45
Non-repeat CDS	orf19.6217	3798	41.47
Non-repeat CDS	orf19.6219	1356	40.27
Non-repeat CDS	orf19.6220	2697	36.48
Non-repeat CDS	orf19.6220.3	471	39.28
Non-repeat CDS	orf19.6220.4	369	39.84
Non-repeat CDS	orf19.6222	2829	33.85
Non-repeat CDS	orf19.6222.1	204	38.24
Non-repeat CDS	orf19.6224	1494	36.08
Non-repeat CDS	orf19.6225	2055	36.45
Non-repeat CDS	orf19.6225.1	294	35.37
Non-repeat CDS	orf19.6227	993	38.47
Non-repeat CDS	orf19.6229	1458	40.88
Non-repeat CDS	orf19.6230	1176	29.68
Non-repeat CDS	orf19.6231	432	39.81
Non-repeat CDS	orf19.6232	2502	39.33
Non-repeat CDS	orf19.6233	1524	36.81
Non-repeat CDS	orf19.6234	1605	35.51
Non-repeat CDS	orf19.6235	387	41.09
Non-repeat CDS	orf19.6236	630	34.76
Non-repeat CDS	orf19.6237	711	36.85
Non-repeat CDS	orf19.6238	1203	36.91
Non-repeat CDS	orf19.6239	1032	35.56
Non-repeat CDS	orf19.6240	1584	33.9
Non-repeat CDS	orf19.6242	960	38.23
Non-repeat CDS	orf19.6243	3063	32.84
Non-repeat CDS	orf19.6244	2322	36.22
Non-repeat CDS	orf19.6245	1701	35.51
Non-repeat CDS	orf19.6246	567	35.63
Non-repeat CDS	orf19.6247	2616	33.64
Non-repeat CDS	orf19.6247.1	144	32.64
Non-repeat CDS	orf19.6248	702	30.48
Non-repeat CDS	orf19.6249	2427	34.59
Non-repeat CDS	orf19.6250	1044	42.53
Non-repeat CDS	orf19.6252	1203	37.07
Non-repeat CDS	orf19.6253	438	38.13
Non-repeat CDS	orf19.6254	1038	36.32
Non-repeat CDS	orf19.6255	1314	33.87
Non-repeat CDS	orf19.6257	6381	37.91
Non-repeat CDS	orf19.6259	1122	31.19
Non-repeat CDS	orf19.6260	4119	35.03
Non-repeat CDS	orf19.6261	6822	31.38
Non-repeat CDS	orf19.6263	1398	36.84
Non-repeat CDS	orf19.6264	717	33.47
Non-repeat CDS	orf19.6264.3	528	32.2
Non-repeat CDS	orf19.6264.4	156	35.9
Non-repeat CDS	orf19.6265.1	399	40.85
Non-repeat CDS	orf19.6266	2616	29.4
Non-repeat CDS	orf19.6267	1368	31.8
Non-repeat CDS	orf19.6268	2175	33.43
Non-repeat CDS	orf19.6269	2586	28.15
Non-repeat CDS	orf19.6271	2133	34.93
Non-repeat CDS	orf19.6272	777	25.23
Non-repeat CDS	orf19.6273	324	36.11
Non-repeat CDS	orf19.6274	528	34.47
Non-repeat CDS	orf19.6275	1698	29.51
Non-repeat CDS	orf19.6276	2622	30.66
Non-repeat CDS	orf19.6277	3360	26.68
Non-repeat CDS	orf19.6280	354	24.29
Non-repeat CDS	orf19.6340	645	29.15
Non-repeat CDS	orf19.6341	915	30.71
Non-repeat CDS	orf19.6342	486	31.69
Non-repeat CDS	orf19.6343	1014	28.7
Non-repeat CDS	orf19.6344	1173	31.63
Non-repeat CDS	orf19.6345	2793	30.11
Non-repeat CDS	orf19.6346	966	27.02
Non-repeat CDS	orf19.6347	1563	27.9
Non-repeat CDS	orf19.6348	2826	28.45
Non-repeat CDS	orf19.6349	1008	24.01
Non-repeat CDS	orf19.6350	543	33.7
Non-repeat CDS	orf19.6351	1404	30.06
Non-repeat CDS	orf19.6354	651	24.73
Non-repeat CDS	orf19.6355	1554	33.98
Non-repeat CDS	orf19.6356	2736	27.49
Non-repeat CDS	orf19.6357	2091	25.56
Non-repeat CDS	orf19.6358	414	27.54
Non-repeat CDS	orf19.6359	402	27.86
Non-repeat CDS	orf19.6360	675	29.48
Non-repeat CDS	orf19.6362	4401	35.7
Non-repeat CDS	orf19.655	1638	38.13
Non-repeat CDS	orf19.656	786	32.82
Non-repeat CDS	orf19.657	1158	41.11
Non-repeat CDS	orf19.658	3705	31.82
Non-repeat CDS	orf19.660	1947	34.21
Non-repeat CDS	orf19.661	1077	31.1
Non-repeat CDS	orf19.663	4050	35.75
Non-repeat CDS	orf19.664	735	30.75
Non-repeat CDS	orf19.665	804	34.2
Non-repeat CDS	orf19.666	2181	33.56
Non-repeat CDS	orf19.667.1	273	43.59
Non-repeat CDS	orf19.668	1479	36.04
Non-repeat CDS	orf19.669	1872	34.03
Non-repeat CDS	orf19.670	309	39.16
Non-repeat CDS	orf19.670.2	231	39.39
Non-repeat CDS	orf19.671	2010	35.07
Non-repeat CDS	orf19.672	1746	36.71
Non-repeat CDS	orf19.673	1110	37.48
Non-repeat CDS	orf19.674	1092	35.53
Non-repeat CDS	orf19.675	639	45.85
Non-repeat CDS	orf19.675.1	138	36.23
Non-repeat CDS	orf19.676	897	38.8
Non-repeat CDS	orf19.677	822	34.55
Non-repeat CDS	orf19.679	564	33.87
Non-repeat CDS	orf19.68.2	417	24.22
Non-repeat CDS	orf19.680	1410	36.6
Non-repeat CDS	orf19.681	1905	39.58
Non-repeat CDS	orf19.6833.2	369	37.13
Non-repeat CDS	orf19.6837	762	39.24
Non-repeat CDS	orf19.6838	810	40.12
Non-repeat CDS	orf19.6840	522	35.06
Non-repeat CDS	orf19.6842	4194	38.53
Non-repeat CDS	orf19.6843	1122	36.81
Non-repeat CDS	orf19.6844	1653	42.29
Non-repeat CDS	orf19.6845	1440	34.58
Non-repeat CDS	orf19.6846	999	36.74
Non-repeat CDS	orf19.6847	1560	38.21
Non-repeat CDS	orf19.6848	2841	33.58
Non-repeat CDS	orf19.6849	303	33.33
Non-repeat CDS	orf19.6850	1734	33.28
Non-repeat CDS	orf19.6851	1398	34.91
Non-repeat CDS	orf19.6852	828	35.14
Non-repeat CDS	orf19.6852.1	189	33.33
Non-repeat CDS	orf19.6853	1038	37.76
Non-repeat CDS	orf19.6854	1641	41.74
Non-repeat CDS	orf19.6855	1731	33.97
Non-repeat CDS	orf19.69	738	32.93
Non-repeat CDS	orf19.69.2	294	26.19
Non-repeat CDS	orf19.71	1053	38.94
Non-repeat CDS	orf19.7206	609	36.78
Non-repeat CDS	orf19.7207	2436	36
Non-repeat CDS	orf19.7208	1125	37.42
Non-repeat CDS	orf19.7209	408	39.46
Non-repeat CDS	orf19.7210	1008	38.59
Non-repeat CDS	orf19.7212	2304	36.85
Non-repeat CDS	orf19.7213	3372	37.51
Non-repeat CDS	orf19.7214	1509	38.63
Non-repeat CDS	orf19.7215	5457	35.07
Non-repeat CDS	orf19.7215.3	321	38.63
Non-repeat CDS	orf19.7216	666	38.59
Non-repeat CDS	orf19.7217	1092	43.68
Non-repeat CDS	orf19.7218	816	41.05
Non-repeat CDS	orf19.7221	3210	38.63
Non-repeat CDS	orf19.7222	366	40.44
Non-repeat CDS	orf19.7223	1755	34.19
Non-repeat CDS	orf19.7224	1677	36.67
Non-repeat CDS	orf19.7225	1572	36.32
Non-repeat CDS	orf19.7227	375	37.6
Non-repeat CDS	orf19.7228	993	35.65
Non-repeat CDS	orf19.7229	2601	38.18
Non-repeat CDS	orf19.7232	3270	36.18
Non-repeat CDS	orf19.7234	1686	36.65
Non-repeat CDS	orf19.7235	2679	39.98
Non-repeat CDS	orf19.7236	840	42.38
Non-repeat CDS	orf19.7237	804	37.56
Non-repeat CDS	orf19.7238	861	42.86
Non-repeat CDS	orf19.7242	3771	38.19
Non-repeat CDS	orf19.7243	1014	38.56
Non-repeat CDS	orf19.7244	696	39.66
Non-repeat CDS	orf19.7245	1272	41.82
Non-repeat CDS	orf19.7247	1986	40.63
Non-repeat CDS	orf19.7250	444	40.32
Non-repeat CDS	orf19.7251	1476	43.56
Non-repeat CDS	orf19.7252	324	39.81
Non-repeat CDS	orf19.7254	1800	42.44
Non-repeat CDS	orf19.7255	222	41.89
Non-repeat CDS	orf19.7256	234	41.45
Non-repeat CDS	orf19.7257	1911	44.64
Non-repeat CDS	orf19.7258	972	44.96
Non-repeat CDS	orf19.7260	780	47.56
Non-repeat CDS	orf19.7261	1350	47.7
Non-repeat CDS	orf19.7263	1353	49.52
Non-repeat CDS	orf19.7264	939	46.22
Non-repeat CDS	orf19.7265	729	48.15
Non-repeat CDS	orf19.7266	315	47.94
Non-repeat CDS	orf19.7267	756	46.83
Non-repeat CDS	orf19.7269	663	46.3
Non-repeat CDS	orf19.7270	1062	46.7
Non-repeat CDS	orf19.7271	321	33.96
Non-repeat CDS	orf19.7272	333	36.64
Non-repeat CDS	orf19.7274	978	37.93
Non-repeat CDS	orf19.7275	717	34.87
Non-repeat CDS	orf19.7276.1	201	43.28
Non-repeat CDS	orf19.7277	528	38.83
Non-repeat CDS	orf19.7278	681	33.85
Non-repeat CDS	orf19.751	702	31.91
Non-repeat CDS	orf19.752	960	33.33
Non-repeat CDS	orf19.753	2292	33.57
Non-repeat CDS	orf19.754	1191	35.1
Non-repeat CDS	orf19.755	363	29.75
Non-repeat CDS	orf19.756	1767	36.11
Non-repeat CDS	orf19.757	2571	32.94
Non-repeat CDS	orf19.757.1	174	31.61
Non-repeat CDS	orf19.758	372	34.68
Non-repeat CDS	orf19.759	2811	33.69
Non-repeat CDS	orf19.760	372	32.8
Non-repeat CDS	orf19.761	2127	40.53
Non-repeat CDS	orf19.762	2112	35.32
Non-repeat CDS	orf19.763	675	40.59
Non-repeat CDS	orf19.764	2658	30.89
Non-repeat CDS	orf19.767	1161	31.78
Non-repeat CDS	orf19.768	2964	33.03
Non-repeat CDS	orf19.769	1185	33.42
Non-repeat CDS	orf19.771	1047	31.81
Non-repeat CDS	orf19.772.1	222	31.08
Non-repeat CDS	orf19.773	588	29.76
Non-repeat CDS	orf19.775	2736	32.09
Non-repeat CDS	orf19.776	1908	33.07
Non-repeat CDS	orf19.778	927	37.76
Non-repeat CDS	orf19.779	1242	32.13
Non-repeat CDS	orf19.780	5442	37.19
Non-repeat CDS	orf19.781	2178	38.43
Non-repeat CDS	orf19.782	1962	34.51
Non-repeat CDS	orf19.783	3492	36.23
Non-repeat CDS	orf19.8278	342	26.61
Non-repeat CDS	orf19.984	1509	37.84
Non-repeat CDS	orf19.985	2514	34.29
Non-repeat CDS	orf19.986	1122	35.83
Non-repeat CDS	orf19.988	1233	35.52
Non-repeat CDS	orf19.989	1011	35.51
Non-repeat CDS	orf19.991	1527	37.13
Non-repeat CDS	orf19.992	1872	35.95
Non-repeat CDS	orf19.993	525	37.52
Non-repeat CDS	orf19.994	549	37.7
Non-repeat CDS	orf19.996	1854	32.58
Non-repeat CDS	orf19.997	600	30.5
Non-repeat CDS	orf19.998	1563	36.72
Non-repeat CDS	orf19.999	2841	36.92
Non-repeat CDS	orf19.1223	2133	27.99
Non-repeat CDS	orf19.1224	858	33.1
Non-repeat CDS	orf19.1225	624	24.2
Non-repeat CDS	orf19.1295	3360	31.13
Non-repeat CDS	orf19.1296	1710	26.03
Non-repeat CDS	orf19.1348	564	36.17
Non-repeat CDS	orf19.1349	441	36.51
Non-repeat CDS	orf19.1350	999	28.93
Non-repeat CDS	orf19.1351	741	33.2
Non-repeat CDS	orf19.1352	555	38.74
Non-repeat CDS	orf19.1353	537	30.91
Non-repeat CDS	orf19.1354	606	30.36
Non-repeat CDS	orf19.1355	1044	31.61
Non-repeat CDS	orf19.1356	1008	28.37
Non-repeat CDS	orf19.1357	1545	34.34
Non-repeat CDS	orf19.1358	972	35.19
Non-repeat CDS	orf19.1359	1752	30.02
Non-repeat CDS	orf19.1360	489	30.06
Non-repeat CDS	orf19.1360.1	183	27.87
Non-repeat CDS	orf19.1361	657	33.18
Non-repeat CDS	orf19.1362	1302	31.11
Non-repeat CDS	orf19.1363	1179	30.36
Non-repeat CDS	orf19.1364	1038	32.08
Non-repeat CDS	orf19.1365	1521	34.71
Non-repeat CDS	orf19.1366	1260	31.98
Non-repeat CDS	orf19.1367	945	25.71
Non-repeat CDS	orf19.1367.1	243	29.63
Non-repeat CDS	orf19.1368	1827	37.22
Non-repeat CDS	orf19.1369	1305	35.48
Non-repeat CDS	orf19.1370	864	33.56
Non-repeat CDS	orf19.1371	1518	32.35
Non-repeat CDS	orf19.1373	2961	35.7
Non-repeat CDS	orf19.1374	573	34.38
Non-repeat CDS	orf19.1375	1716	37.18
Non-repeat CDS	orf19.1376	888	33.33
Non-repeat CDS	orf19.1377	1053	35.61
Non-repeat CDS	orf19.1378	2166	38.69
Non-repeat CDS	orf19.1381	1395	38.85
Non-repeat CDS	orf19.1382	981	35.07
Non-repeat CDS	orf19.1383	1944	36.16
Non-repeat CDS	orf19.1386	453	33.55
Non-repeat CDS	orf19.1387	885	36.72
Non-repeat CDS	orf19.1388	657	32.88
Non-repeat CDS	orf19.1389	492	39.23
Non-repeat CDS	orf19.1390	1326	35.75
Non-repeat CDS	orf19.1391	510	33.53
Non-repeat CDS	orf19.1392	2214	34.33
Non-repeat CDS	orf19.1393	1101	38.06
Non-repeat CDS	orf19.1394	501	33.93
Non-repeat CDS	orf19.1395	1017	36.38
Non-repeat CDS	orf19.1396	1164	37.97
Non-repeat CDS	orf19.1397	711	35.16
Non-repeat CDS	orf19.1400	2244	29.1
Non-repeat CDS	orf19.1402	1581	37.63
Non-repeat CDS	orf19.1403	1719	37.41
Non-repeat CDS	orf19.1404	1404	36.82
Non-repeat CDS	orf19.1405	966	35.51
Non-repeat CDS	orf19.1406	771	28.66
Non-repeat CDS	orf19.1433	1194	33
Non-repeat CDS	orf19.1433.1	120	34.17
Non-repeat CDS	orf19.1434	2148	35.01
Non-repeat CDS	orf19.144	3069	26.69
Non-repeat CDS	orf19.1441	1857	30.16
Non-repeat CDS	orf19.1442	2109	33.67
Non-repeat CDS	orf19.1444	1569	36.65
Non-repeat CDS	orf19.1445	2712	30.05
Non-repeat CDS	orf19.1446	1479	34.42
Non-repeat CDS	orf19.1447	1617	33.64
Non-repeat CDS	orf19.1448	567	35.63
Non-repeat CDS	orf19.1448.1	276	30.43
Non-repeat CDS	orf19.1449	690	36.23
Non-repeat CDS	orf19.145	810	27.65
Non-repeat CDS	orf19.1450	1107	33.69
Non-repeat CDS	orf19.1451	4998	36.35
Non-repeat CDS	orf19.1453	2871	41.03
Non-repeat CDS	orf19.1456	435	40.46
Non-repeat CDS	orf19.1457	1419	39.75
Non-repeat CDS	orf19.1458	813	33.46
Non-repeat CDS	orf19.1459	1083	38.04
Non-repeat CDS	orf19.1460	2145	37.11
Non-repeat CDS	orf19.1461	1170	37.61
Non-repeat CDS	orf19.1462	2346	37.13
Non-repeat CDS	orf19.1464	1839	34.58
Non-repeat CDS	orf19.1465	546	31.87
Non-repeat CDS	orf19.1466	714	31.79
Non-repeat CDS	orf19.1467	405	34.81
Non-repeat CDS	orf19.1468	1560	35.96
Non-repeat CDS	orf19.147	2430	30
Non-repeat CDS	orf19.1470	360	39.72
Non-repeat CDS	orf19.1471	474	41.35
Non-repeat CDS	orf19.1473	1095	34.89
Non-repeat CDS	orf19.1474	3774	40.41
Non-repeat CDS	orf19.1476	1632	32.23
Non-repeat CDS	orf19.1477	579	32.12
Non-repeat CDS	orf19.1478	2256	35.11
Non-repeat CDS	orf19.1479	2343	37.43
Non-repeat CDS	orf19.1480	531	34.84
Non-repeat CDS	orf19.1481	2517	35
Non-repeat CDS	orf19.1482	321	31.15
Non-repeat CDS	orf19.1483	396	27.02
Non-repeat CDS	orf19.1484	759	22.13
Non-repeat CDS	orf19.1485	342	26.9
Non-repeat CDS	orf19.1486	498	30.32
Non-repeat CDS	orf19.1488	660	26.36
Non-repeat CDS	orf19.149	438	43.15
Non-repeat CDS	orf19.1490.1	288	41.67
Non-repeat CDS	orf19.1491	1845	26.45
Non-repeat CDS	orf19.1493	1959	34.15
Non-repeat CDS	orf19.1494	1254	37.64
Non-repeat CDS	orf19.1495	798	25.69
Non-repeat CDS	orf19.1496	1356	28.91
Non-repeat CDS	orf19.1497	1113	30.64
Non-repeat CDS	orf19.1499	3435	33.04
Non-repeat CDS	orf19.150	465	39.78
Non-repeat CDS	orf19.1500	1524	29.53
Non-repeat CDS	orf19.1502	768	25.52
Non-repeat CDS	orf19.1504	2562	29.51
Non-repeat CDS	orf19.1505	1038	26.49
Non-repeat CDS	orf19.1506	426	32.63
Non-repeat CDS	orf19.1507	1977	26.35
Non-repeat CDS	orf19.1508	336	32.14
Non-repeat CDS	orf19.1509	2772	31.42
Non-repeat CDS	orf19.151	2013	31.05
Non-repeat CDS	orf19.1510	1881	34.72
Non-repeat CDS	orf19.1513	7875	35.07
Non-repeat CDS	orf19.1514	1023	35.19
Non-repeat CDS	orf19.1515	1167	32.9
Non-repeat CDS	orf19.1516	2385	33.17
Non-repeat CDS	orf19.1517	1116	38.35
Non-repeat CDS	orf19.1519	3303	35.45
Non-repeat CDS	orf19.1522	3129	35.35
Non-repeat CDS	orf19.1524	1476	31.98
Non-repeat CDS	orf19.1525	1197	32.33
Non-repeat CDS	orf19.1527	555	31.17
Non-repeat CDS	orf19.1528	1056	31.34
Non-repeat CDS	orf19.1529	1029	29.83
Non-repeat CDS	orf19.1530	522	23.56
Non-repeat CDS	orf19.1531	2376	28.45
Non-repeat CDS	orf19.1532	1071	24.37
Non-repeat CDS	orf19.1533	1377	29.63
Non-repeat CDS	orf19.1534	1776	28.77
Non-repeat CDS	orf19.1535	795	32.7
Non-repeat CDS	orf19.1536	1437	30.62
Non-repeat CDS	orf19.1538	1269	25.14
Non-repeat CDS	orf19.1539	1200	30.92
Non-repeat CDS	orf19.154	1086	25.69
Non-repeat CDS	orf19.1541	2898	31.75
Non-repeat CDS	orf19.1542	1809	37.81
Non-repeat CDS	orf19.1543	1302	35.56
Non-repeat CDS	orf19.1544	798	36.59
Non-repeat CDS	orf19.1545	468	33.97
Non-repeat CDS	orf19.1546	879	32.65
Non-repeat CDS	orf19.1547	906	35.21
Non-repeat CDS	orf19.1548	732	32.79
Non-repeat CDS	orf19.1549	747	30.92
Non-repeat CDS	orf19.155	1035	30.34
Non-repeat CDS	orf19.1551	504	35.52
Non-repeat CDS	orf19.1553	1362	36.71
Non-repeat CDS	orf19.1555	3672	35.13
Non-repeat CDS	orf19.1557	843	33.57
Non-repeat CDS	orf19.1559	1098	38.34
Non-repeat CDS	orf19.1560	1617	37.29
Non-repeat CDS	orf19.1562	543	36.1
Non-repeat CDS	orf19.1563	1641	37.36
Non-repeat CDS	orf19.1564	570	34.21
Non-repeat CDS	orf19.1565	1842	37.3
Non-repeat CDS	orf19.1566	2829	35.91
Non-repeat CDS	orf19.1567	3105	33.11
Non-repeat CDS	orf19.1569	3528	34.55
Non-repeat CDS	orf19.1570	2187	37.31
Non-repeat CDS	orf19.1571	783	39.21
Non-repeat CDS	orf19.1573	4053	35.97
Non-repeat CDS	orf19.1574	1767	37.63
Non-repeat CDS	orf19.1575	963	35.62
Non-repeat CDS	orf19.1576	1869	35.74
Non-repeat CDS	orf19.1577	1329	34.54
Non-repeat CDS	orf19.1578	5169	30.43
Non-repeat CDS	orf19.1580	2112	34.14
Non-repeat CDS	orf19.1582	1662	38.69
Non-repeat CDS	orf19.1584	1533	39.4
Non-repeat CDS	orf19.1585	1113	38.9
Non-repeat CDS	orf19.1587	1512	37.63
Non-repeat CDS	orf19.1588	420	38.33
Non-repeat CDS	orf19.1589.1	1362	43.87
Non-repeat CDS	orf19.1590	1782	27.89
Non-repeat CDS	orf19.1591	1209	37.39
Non-repeat CDS	orf19.1592	759	30.96
Non-repeat CDS	orf19.1597	867	31.49
Non-repeat CDS	orf19.1598	1347	35.86
Non-repeat CDS	orf19.1599	357	35.85
Non-repeat CDS	orf19.1600	2130	40.56
Non-repeat CDS	orf19.1601	1170	43.16
Non-repeat CDS	orf19.1604	2970	36.33
Non-repeat CDS	orf19.1605	2733	30.99
Non-repeat CDS	orf19.17	585	27.86
Non-repeat CDS	orf19.1742	1023	31.96
Non-repeat CDS	orf19.1743	2028	35.5
Non-repeat CDS	orf19.1744	816	28.31
Non-repeat CDS	orf19.1745	495	34.34
Non-repeat CDS	orf19.1746	1326	29.41
Non-repeat CDS	orf19.1747	1998	32.28
Non-repeat CDS	orf19.1748	2046	31.92
Non-repeat CDS	orf19.1750	792	46.84
Non-repeat CDS	orf19.1751	2229	32.79
Non-repeat CDS	orf19.1753	2280	29.69
Non-repeat CDS	orf19.1754	1434	32.43
Non-repeat CDS	orf19.1755	2535	31.32
Non-repeat CDS	orf19.1756	1212	32.92
Non-repeat CDS	orf19.1757	1752	30.99
Non-repeat CDS	orf19.1759	1449	32.99
Non-repeat CDS	orf19.1760	876	30.02
Non-repeat CDS	orf19.1761	516	26.94
Non-repeat CDS	orf19.1762	810	29.88
Non-repeat CDS	orf19.1763	1113	30.82
Non-repeat CDS	orf19.1764	849	30.86
Non-repeat CDS	orf19.1766	1206	30.43
Non-repeat CDS	orf19.1767	1842	25.14
Non-repeat CDS	orf19.1768	3135	28.74
Non-repeat CDS	orf19.1769	798	27.94
Non-repeat CDS	orf19.1770	333	35.14
Non-repeat CDS	orf19.1771	1947	27.17
Non-repeat CDS	orf19.1772	2955	26.02
Non-repeat CDS	orf19.1773	1290	31.86
Non-repeat CDS	orf19.1776	969	23.84
Non-repeat CDS	orf19.1777	4149	30.97
Non-repeat CDS	orf19.1778	315	33.97
Non-repeat CDS	orf19.1779	1137	39.31
Non-repeat CDS	orf19.1782.1	618	34.95
Non-repeat CDS	orf19.1783	4467	31.68
Non-repeat CDS	orf19.1785	981	33.94
Non-repeat CDS	orf19.18	1566	35.44
Non-repeat CDS	orf19.182	1416	31.29
Non-repeat CDS	orf19.183	669	32.88
Non-repeat CDS	orf19.184	1422	29.75
Non-repeat CDS	orf19.185	1107	29.09
Non-repeat CDS	orf19.1860.1	1401	34.19
Non-repeat CDS	orf19.1861	1875	33.97
Non-repeat CDS	orf19.1862	366	34.43
Non-repeat CDS	orf19.1863	1788	32.94
Non-repeat CDS	orf19.1864	2160	36.48
Non-repeat CDS	orf19.1865	1845	40
Non-repeat CDS	orf19.1866	342	32.46
Non-repeat CDS	orf19.1867	1200	37.33
Non-repeat CDS	orf19.1868	1185	36.71
Non-repeat CDS	orf19.1871	4926	37.49
Non-repeat CDS	orf19.1872	636	39.62
Non-repeat CDS	orf19.1873	333	41.44
Non-repeat CDS	orf19.1874	1338	34.01
Non-repeat CDS	orf19.1876	1359	38.93
Non-repeat CDS	orf19.1877	816	34.19
Non-repeat CDS	orf19.1878	972	35.6
Non-repeat CDS	orf19.188	2451	32.52
Non-repeat CDS	orf19.1880	1161	37.73
Non-repeat CDS	orf19.1881	1809	35.49
Non-repeat CDS	orf19.1883	3519	37.28
Non-repeat CDS	orf19.1885	1092	38.46
Non-repeat CDS	orf19.1886	1116	38.44
Non-repeat CDS	orf19.1887	1704	39.2
Non-repeat CDS	orf19.1888	993	35.45
Non-repeat CDS	orf19.1889	723	37.48
Non-repeat CDS	orf19.1890	1467	38.04
Non-repeat CDS	orf19.1891	1260	40.79
Non-repeat CDS	orf19.1893	2370	37.34
Non-repeat CDS	orf19.1896	1947	39.6
Non-repeat CDS	orf19.1897	1035	37.58
Non-repeat CDS	orf19.190	975	29.54
Non-repeat CDS	orf19.1900	1452	37.53
Non-repeat CDS	orf19.1901	2637	38.45
Non-repeat CDS	orf19.1902	1689	33.21
Non-repeat CDS	orf19.1906	330	31.52
Non-repeat CDS	orf19.1907	2154	40.71
Non-repeat CDS	orf19.191	2676	34.94
Non-repeat CDS	orf19.1910	624	44.71
Non-repeat CDS	orf19.1911	1155	43.2
Non-repeat CDS	orf19.1913	627	45.93
Non-repeat CDS	orf19.1914	1344	43.82
Non-repeat CDS	orf19.1915	1704	42.66
Non-repeat CDS	orf19.1917	1146	44.94
Non-repeat CDS	orf19.192	1704	28.87
Non-repeat CDS	orf19.1920	534	48.69
Non-repeat CDS	orf19.1923	1671	46.26
Non-repeat CDS	orf19.1925	531	33.71
Non-repeat CDS	orf19.193	837	21.62
Non-repeat CDS	orf19.194	1608	25.84
Non-repeat CDS	orf19.198	1722	36.82
Non-repeat CDS	orf19.1989	1359	37.38
Non-repeat CDS	orf19.199	1536	30.34
Non-repeat CDS	orf19.1990	1893	27.89
Non-repeat CDS	orf19.1991	1734	29.76
Non-repeat CDS	orf19.1992	1560	30.83
Non-repeat CDS	orf19.1993	1242	22.71
Non-repeat CDS	orf19.1994	2046	28.3
Non-repeat CDS	orf19.1995	2130	27.28
Non-repeat CDS	orf19.1996	1062	33.15
Non-repeat CDS	orf19.1998	2118	31.16
Non-repeat CDS	orf19.20	2553	35.25
Non-repeat CDS	orf19.200	582	33.33
Non-repeat CDS	orf19.2000	2529	29.74
Non-repeat CDS	orf19.2001	756	28.84
Non-repeat CDS	orf19.2002	2883	29.55
Non-repeat CDS	orf19.2003	1617	35
Non-repeat CDS	orf19.2005	3036	36.46
Non-repeat CDS	orf19.2006	891	28.96
Non-repeat CDS	orf19.2006.1	186	28.49
Non-repeat CDS	orf19.2007	2937	33.81
Non-repeat CDS	orf19.2008	1251	30.54
Non-repeat CDS	orf19.2009	1401	31.41
Non-repeat CDS	orf19.201	504	34.72
Non-repeat CDS	orf19.2010	396	34.34
Non-repeat CDS	orf19.2012	2259	35.41
Non-repeat CDS	orf19.2014	1377	38.05
Non-repeat CDS	orf19.2016	417	29.5
Non-repeat CDS	orf19.2017	1182	35.11
Non-repeat CDS	orf19.2018	450	37.11
Non-repeat CDS	orf19.2018.1	315	28.25
Non-repeat CDS	orf19.2018.2	258	36.43
Non-repeat CDS	orf19.2019	642	37.23
Non-repeat CDS	orf19.202	2346	36.91
Non-repeat CDS	orf19.2024	360	33.47
Non-repeat CDS	orf19.2025	345	35.65
Non-repeat CDS	orf19.2026	2103	36.14
Non-repeat CDS	orf19.2028	558	35.84
Non-repeat CDS	orf19.2029	1089	33.88
Non-repeat CDS	orf19.203	1512	39.55
Non-repeat CDS	orf19.2030	474	38.19
Non-repeat CDS	orf19.2031	672	33.63
Non-repeat CDS	orf19.2032	669	32.29
Non-repeat CDS	orf19.2033	690	33.91
Non-repeat CDS	orf19.2034	690	33.48
Non-repeat CDS	orf19.2035	957	35.01
Non-repeat CDS	orf19.2036	1080	33.8
Non-repeat CDS	orf19.2037	459	31.37
Non-repeat CDS	orf19.2038	1257	30.15
Non-repeat CDS	orf19.2039	1341	36.76
Non-repeat CDS	orf19.204	615	33.66
Non-repeat CDS	orf19.2040	1770	35.93
Non-repeat CDS	orf19.2041	1911	36.68
Non-repeat CDS	orf19.2042	1500	36
Non-repeat CDS	orf19.2043	903	37.32
Non-repeat CDS	orf19.2044	1458	34.43
Non-repeat CDS	orf19.2045	1038	35.07
Non-repeat CDS	orf19.2046	1182	39.51
Non-repeat CDS	orf19.2047	627	36.04
Non-repeat CDS	orf19.2048	366	38.52
Non-repeat CDS	orf19.2049	855	30.06
Non-repeat CDS	orf19.2050	1623	34.75
Non-repeat CDS	orf19.2051	2889	37.97
Non-repeat CDS	orf19.2054	1557	36.87
Non-repeat CDS	orf19.2055	1350	36.15
Non-repeat CDS	orf19.2057	2541	36.32
Non-repeat CDS	orf19.2059	912	36.73
Non-repeat CDS	orf19.2060	687	40.32
Non-repeat CDS	orf19.2061	321	30.22
Non-repeat CDS	orf19.2062	699	39.48
Non-repeat CDS	orf19.2063	3471	36.85
Non-repeat CDS	orf19.2064	3324	38.18
Non-repeat CDS	orf19.2065	1029	40.04
Non-repeat CDS	orf19.2066	972	36.01
Non-repeat CDS	orf19.2066.1	195	36.41
Non-repeat CDS	orf19.2067	714	35.71
Non-repeat CDS	orf19.2068	1581	32.95
Non-repeat CDS	orf19.2069	1545	38.12
Non-repeat CDS	orf19.2070	1707	36.38
Non-repeat CDS	orf19.2071	477	35.01
Non-repeat CDS	orf19.2072	1710	37.84
Non-repeat CDS	orf19.2073	1833	39.83
Non-repeat CDS	orf19.2074	309	34.3
Non-repeat CDS	orf19.2075	1356	39.68
Non-repeat CDS	orf19.2076	1005	36.32
Non-repeat CDS	orf19.2077	2505	38.04
Non-repeat CDS	orf19.2078	2010	34.28
Non-repeat CDS	orf19.2079	345	35.94
Non-repeat CDS	orf19.2081	3786	36.05
Non-repeat CDS	orf19.2082	1308	35.93
Non-repeat CDS	orf19.2084	1794	40.02
Non-repeat CDS	orf19.2087	1059	35.13
Non-repeat CDS	orf19.2088	786	38.04
Non-repeat CDS	orf19.2089	846	33.69
Non-repeat CDS	orf19.209	849	34.39
Non-repeat CDS	orf19.2090	3792	38.21
Non-repeat CDS	orf19.2091	732	35.38
Non-repeat CDS	orf19.2092	1215	38.93
Non-repeat CDS	orf19.2093	1875	37.97
Non-repeat CDS	orf19.2094	3015	34.1
Non-repeat CDS	orf19.2095	2100	37.24
Non-repeat CDS	orf19.2097	3255	37.79
Non-repeat CDS	orf19.2098	1476	42.34
Non-repeat CDS	orf19.2099	2724	39.43
Non-repeat CDS	orf19.21	588	31.63
Non-repeat CDS	orf19.210	1380	38.19
Non-repeat CDS	orf19.2101	600	36.83
Non-repeat CDS	orf19.2102	882	38.55
Non-repeat CDS	orf19.2103	447	38.48
Non-repeat CDS	orf19.2104	630	40.16
Non-repeat CDS	orf19.2105	651	39.94
Non-repeat CDS	orf19.2106	708	40.68
Non-repeat CDS	orf19.2107	1119	40.21
Non-repeat CDS	orf19.2107.1	270	38.15
Non-repeat CDS	orf19.2108	951	40.48
Non-repeat CDS	orf19.211	543	39.23
Non-repeat CDS	orf19.2110	1389	38.88
Non-repeat CDS	orf19.2111	1146	39.09
Non-repeat CDS	orf19.2111.2	237	34.6
Non-repeat CDS	orf19.2112	813	38.87
Non-repeat CDS	orf19.2113	1389	39.52
Non-repeat CDS	orf19.2114	912	38.27
Non-repeat CDS	orf19.2115	1305	41.46
Non-repeat CDS	orf19.2116	639	43.35
Non-repeat CDS	orf19.2117	1227	42.79
Non-repeat CDS	orf19.2119	1515	44.69
Non-repeat CDS	orf19.212	747	32.93
Non-repeat CDS	orf19.213	834	30.1
Non-repeat CDS	orf19.215	1749	38.54
Non-repeat CDS	orf19.216	1527	33.79
Non-repeat CDS	orf19.216.1	183	38.25
Non-repeat CDS	orf19.2164.1	129	37.98
Non-repeat CDS	orf19.2165	837	28.2
Non-repeat CDS	orf19.2166	1167	27.85
Non-repeat CDS	orf19.2167	1371	30.56
Non-repeat CDS	orf19.2168.3	522	32.95
Non-repeat CDS	orf19.2169	696	32.47
Non-repeat CDS	orf19.217	1140	38.25
[truncated: 4,199 more rows]
