# Supplementary material for: Genome plasticity in Candida albicans is driven by long repeat sequences
Source: eLife journal article supplement (doi:10.7554/elife.45954), 2019-06-07
Supplement: supp [file elife-45954-supp-v1.zip › elife_poa_e45954_Figure_6_source_data_1.xlsx]

## Sheet: Figure 6A&B
These data were used to support that long repeat sequences associated with observed breakpoints (CNV, LOH, and sequence inversions) are significantly longer and have a higher median percent sequence identity than repeats not associated with observed breakpoints.
These data were used in generating Figure 6A & 6B.
* p<0.05, **p<0.01, ***p<0.001, ****p<0.0001
Breakpoint	Copy Length	Identity		Breakpoint	n-value	Median Copy Length (bp)	Median Identity (%)		Figure 6A&B Breakpoint Copy Length Analysis
Breakpoint	3215	99.53		Break	n= 53	785	96.19		Null Hypothesis: There is no significant difference in the distribution of long repeat sequence copy length between repeats found within 2 kb of a breakpoint and repeats not found within 2 kb of a breakpoint
Breakpoint	524	99.81		Not Break	n= 1550	278	94.24		Table Analyzed	Breakpoint Copy Length
Breakpoint	2204	99.32
Breakpoint	4753	97.81							Break Copy Length
Breakpoint	4122	96.19							vs.
Breakpoint	4113	99.13							Non-Break Copy Length
Breakpoint	1745	98.34
Breakpoint	127	97.64							Kolmogorov-Smirnov test
Breakpoint	1651	97.64							P value	< 0.0001
Breakpoint	281	93.66							Exact or approximate P value?	Approximate
Breakpoint	1121	99.02							P value summary	****
Breakpoint	1230	89.17							Significantly different? (P < 0.05)	Yes
Breakpoint	177	99.44							Kolmogorov-Smirnov D	0.5292
Breakpoint	480	93.33
Breakpoint	785	97.45							Figure 6A&B Breakpoint Identity Analysis
Breakpoint	127	94.53							Null Hypothesis: There is no significant difference in the distribution of long repeat percent sequence identity between repeats found within 2 kb of a breakpoint and repeats not found within 2 kb of a breakpoint
Breakpoint	1746	94.91							Table Analyzed	Breakpoint Identity
Breakpoint	4114	99.13
Breakpoint	1764	94.11							Break ID
Breakpoint	185	91.89							vs.
Breakpoint	190	98.95							Non-Break ID
Breakpoint	367	95.19
Breakpoint	478	93.53							Kolmogorov-Smirnov test
Breakpoint	208	94.71							P value	0.0351
Breakpoint	869	86.77							Exact or approximate P value?	Approximate
Breakpoint	617	85.14							P value summary	*
Breakpoint	6499	92.13							Significantly different? (P < 0.05)	Yes
Breakpoint	316	98.73							Kolmogorov-Smirnov D	0.1986
Breakpoint	314	100
Breakpoint	370	94.88							* p<0.05, **p<0.01, ***p<0.001, ****p<0.0001
Breakpoint	471	98.73
Breakpoint	196	91.13
Breakpoint	1179	82.22
Breakpoint	3982	99.52
Breakpoint	78	98.73
Breakpoint	103	100
Breakpoint	407	91.87
Breakpoint	130	95.38
Breakpoint	1320	93.78
Breakpoint	248	89.64
Breakpoint	325	99.69
Breakpoint	1639	91.46
Breakpoint	1639	91.46
Breakpoint	666	83.98
Breakpoint	1782	99.83
Breakpoint	2203	99.32
Breakpoint	661	90.83
Breakpoint	1378	93.76
Breakpoint	1378	93.76
Breakpoint	4755	97.81
Breakpoint	2861	96.47
Breakpoint	752	99.34
Breakpoint	3783	96.35
Non-Breakpoint	509	90.73
Non-Breakpoint	129	91.79
Non-Breakpoint	88	95.51
Non-Breakpoint	83	100
Non-Breakpoint	81	98.77
Non-Breakpoint	387	93.22
Non-Breakpoint	385	92.41
Non-Breakpoint	386	99.74
Non-Breakpoint	387	93.47
Non-Breakpoint	385	92.66
Non-Breakpoint	386	99.74
Non-Breakpoint	1850	84.99
Non-Breakpoint	114	93.91
Non-Breakpoint	105	94.29
Non-Breakpoint	104	95.24
Non-Breakpoint	89	97.78
Non-Breakpoint	88	96.63
Non-Breakpoint	95	96.91
Non-Breakpoint	84	97.67
Non-Breakpoint	90	94.44
Non-Breakpoint	374	94.13
Non-Breakpoint	471	83.09
Non-Breakpoint	472	99.36
Non-Breakpoint	471	85.56
Non-Breakpoint	470	99.36
Non-Breakpoint	470	99.36
Non-Breakpoint	470	95.32
Non-Breakpoint	471	98.94
Non-Breakpoint	159	85.31
Non-Breakpoint	139	93.57
Non-Breakpoint	246	92.8
Non-Breakpoint	247	95.16
Non-Breakpoint	247	94.35
Non-Breakpoint	248	95.18
Non-Breakpoint	248	93.95
Non-Breakpoint	247	95.16
Non-Breakpoint	170	92.35
Non-Breakpoint	311	98.39
Non-Breakpoint	204	98.53
Non-Breakpoint	196	99.49
Non-Breakpoint	197	97.97
Non-Breakpoint	785	97.45
Non-Breakpoint	97	98.97
Non-Breakpoint	97	98.97
Non-Breakpoint	84	98.82
Non-Breakpoint	86	97.67
Non-Breakpoint	88	98.86
Non-Breakpoint	83	96.47
Non-Breakpoint	84	97.65
Non-Breakpoint	371	94.88
Non-Breakpoint	371	94.88
Non-Breakpoint	371	94.35
Non-Breakpoint	371	94.88
Non-Breakpoint	375	94.13
Non-Breakpoint	376	94.68
Non-Breakpoint	221	95.48
Non-Breakpoint	396	98.23
Non-Breakpoint	397	98.49
Non-Breakpoint	389	98.46
Non-Breakpoint	386	91.21
Non-Breakpoint	259	86.59
Non-Breakpoint	120	92.5
Non-Breakpoint	120	92.5
Non-Breakpoint	453	83.92
Non-Breakpoint	75	100
Non-Breakpoint	77	100
Non-Breakpoint	77	100
Non-Breakpoint	78	98.72
Non-Breakpoint	393	95.45
Non-Breakpoint	393	92.41
Non-Breakpoint	393	92.66
Non-Breakpoint	125	94.4
Non-Breakpoint	97	95
Non-Breakpoint	95	100
Non-Breakpoint	79	100
Non-Breakpoint	93	100
Non-Breakpoint	115	86.67
Non-Breakpoint	115	84.87
Non-Breakpoint	126	100
Non-Breakpoint	126	99.21
Non-Breakpoint	128	98.44
Non-Breakpoint	257	92.61
Non-Breakpoint	1648	97.64
Non-Breakpoint	441	88.24
Non-Breakpoint	295	84.85
Non-Breakpoint	1025	82.59
Non-Breakpoint	1025	82.59
Non-Breakpoint	343	90.96
Non-Breakpoint	393	89.31
Non-Breakpoint	331	97.58
Non-Breakpoint	429	96.5
Non-Breakpoint	415	89.64
Non-Breakpoint	1658	89.78
Non-Breakpoint	625	80.54
Non-Breakpoint	392	81.63
Non-Breakpoint	1161	89.42
Non-Breakpoint	238	90.34
Non-Breakpoint	235	90.64
Non-Breakpoint	238	85.29
Non-Breakpoint	238	92.44
Non-Breakpoint	235	89.87
Non-Breakpoint	235	90.64
Non-Breakpoint	128	93.75
Non-Breakpoint	121	94.21
Non-Breakpoint	281	97.15
Non-Breakpoint	226	88.5
Non-Breakpoint	226	89.38
Non-Breakpoint	225	89.33
Non-Breakpoint	213	87.79
Non-Breakpoint	194	82.99
Non-Breakpoint	191	82.99
Non-Breakpoint	282	96.47
Non-Breakpoint	280	98.21
Non-Breakpoint	280	98.21
Non-Breakpoint	284	95.79
Non-Breakpoint	280	97.5
Non-Breakpoint	110	91.07
Non-Breakpoint	105	93.33
Non-Breakpoint	105	95.24
Non-Breakpoint	116	82.05
Non-Breakpoint	117	84.87
Non-Breakpoint	116	86.67
Non-Breakpoint	114	82.05
Non-Breakpoint	85	97.65
Non-Breakpoint	83	98.8
Non-Breakpoint	83	100
Non-Breakpoint	601	84.41
Non-Breakpoint	601	84.41
Non-Breakpoint	418	91.87
Non-Breakpoint	409	94.62
Non-Breakpoint	409	94.38
Non-Breakpoint	417	93.76
Non-Breakpoint	409	94.13
Non-Breakpoint	416	93.51
Non-Breakpoint	409	94.38
Non-Breakpoint	409	94.38
Non-Breakpoint	408	94.36
Non-Breakpoint	397	92.7
Non-Breakpoint	149	92.62
Non-Breakpoint	166	87.35
Non-Breakpoint	281	93.31
Non-Breakpoint	281	92.96
Non-Breakpoint	281	92.96
Non-Breakpoint	281	92.25
Non-Breakpoint	278	92.53
Non-Breakpoint	277	90
Non-Breakpoint	278	90.04
Non-Breakpoint	278	92.5
Non-Breakpoint	263	93.23
Non-Breakpoint	147	95.27
Non-Breakpoint	250	89.64
Non-Breakpoint	248	91.16
Non-Breakpoint	599	88
Non-Breakpoint	599	83.71
Non-Breakpoint	386	95.6
Non-Breakpoint	386	92.76
Non-Breakpoint	651	92.05
Non-Breakpoint	364	96.15
Non-Breakpoint	161	91.46
Non-Breakpoint	363	92.56
Non-Breakpoint	357	95.24
Non-Breakpoint	201	95.52
Non-Breakpoint	298	84.24
Non-Breakpoint	319	85.59
Non-Breakpoint	318	86.71
Non-Breakpoint	318	86.71
Non-Breakpoint	318	87.01
Non-Breakpoint	318	86.71
Non-Breakpoint	319	86.14
Non-Breakpoint	318	92.15
Non-Breakpoint	321	86.53
Non-Breakpoint	318	86.71
Non-Breakpoint	325	86.98
Non-Breakpoint	212	94.34
Non-Breakpoint	257	92.61
Non-Breakpoint	129	97.67
Non-Breakpoint	126	98.41
Non-Breakpoint	126	97.62
Non-Breakpoint	127	97.64
Non-Breakpoint	206	89.86
Non-Breakpoint	140	98.57
Non-Breakpoint	1121	99.02
Non-Breakpoint	177	85.88
Non-Breakpoint	177	86.44
Non-Breakpoint	177	85.88
Non-Breakpoint	177	85.31
Non-Breakpoint	177	85.88
Non-Breakpoint	379	83.64
Non-Breakpoint	813	92.5
Non-Breakpoint	199	98.99
Non-Breakpoint	199	97.99
Non-Breakpoint	280	97.86
Non-Breakpoint	282	97.87
Non-Breakpoint	205	83.41
Non-Breakpoint	244	93.47
Non-Breakpoint	198	91.18
Non-Breakpoint	167	94.05
Non-Breakpoint	1029	84.94
Non-Breakpoint	1399	99.57
Non-Breakpoint	507	99.01
Non-Breakpoint	507	99.01
Non-Breakpoint	278	90.04
Non-Breakpoint	277	97.47
Non-Breakpoint	278	97.84
Non-Breakpoint	211	97.63
Non-Breakpoint	337	83.14
Non-Breakpoint	409	81.51
Non-Breakpoint	809	88.4
Non-Breakpoint	337	83.14
Non-Breakpoint	409	81.51
Non-Breakpoint	809	88.4
Non-Breakpoint	2860	96.47
Non-Breakpoint	202	91.13
Non-Breakpoint	765	90.36
Non-Breakpoint	290	92.41
Non-Breakpoint	290	92.41
Non-Breakpoint	259	98.46
Non-Breakpoint	257	100
Non-Breakpoint	122	95.9
Non-Breakpoint	236	87.6
Non-Breakpoint	249	100
Non-Breakpoint	249	92.37
Non-Breakpoint	248	95.16
Non-Breakpoint	249	95.24
Non-Breakpoint	142	99.3
Non-Breakpoint	1185	90.89
Non-Breakpoint	510	99.61
Non-Breakpoint	241	89.71
Non-Breakpoint	77	100
Non-Breakpoint	508	99.61
Non-Breakpoint	508	99.61
Non-Breakpoint	508	99.41
Non-Breakpoint	508	99.02
Non-Breakpoint	508	98.04
Non-Breakpoint	508	91.36
Non-Breakpoint	509	99.61
Non-Breakpoint	407	94.38
Non-Breakpoint	318	94.65
Non-Breakpoint	113	98.25
Non-Breakpoint	170	92.35
Non-Breakpoint	863	84.51
Non-Breakpoint	1334	93.78
Non-Breakpoint	863	84.51
Non-Breakpoint	396	98.48
Non-Breakpoint	217	97.7
Non-Breakpoint	208	100
Non-Breakpoint	141	97.87
Non-Breakpoint	95	95.79
Non-Breakpoint	287	89.2
Non-Breakpoint	285	93.71
Non-Breakpoint	1662	89.78
Non-Breakpoint	408	80.68
Non-Breakpoint	1571	80.47
Non-Breakpoint	97	96.91
Non-Breakpoint	87	98.86
Non-Breakpoint	85	96.47
Non-Breakpoint	90	96.67
Non-Breakpoint	89	98.88
Non-Breakpoint	1571	80.47
Non-Breakpoint	193	93.81
Non-Breakpoint	192	93.75
Non-Breakpoint	192	88.78
Non-Breakpoint	183	90.32
Non-Breakpoint	1110	84.04
Non-Breakpoint	1113	84.04
Non-Breakpoint	200	98
Non-Breakpoint	200	98
Non-Breakpoint	383	99.22
Non-Breakpoint	219	93.61
Non-Breakpoint	384	99.22
Non-Breakpoint	263	87.69
Non-Breakpoint	263	89.55
Non-Breakpoint	262	93.23
Non-Breakpoint	264	98.11
Non-Breakpoint	279	95.73
Non-Breakpoint	279	95.37
Non-Breakpoint	284	95.79
Non-Breakpoint	285	96.5
Non-Breakpoint	300	97.01
Non-Breakpoint	337	99.41
Non-Breakpoint	287	98.95
Non-Breakpoint	281	95.04
Non-Breakpoint	280	95.37
Non-Breakpoint	280	97.5
Non-Breakpoint	285	95.79
Non-Breakpoint	679	99.85
Non-Breakpoint	216	89.33
Non-Breakpoint	280	93.66
Non-Breakpoint	277	88.34
Non-Breakpoint	275	98.55
Non-Breakpoint	276	90.07
Non-Breakpoint	353	95.24
Non-Breakpoint	231	90.48
Non-Breakpoint	234	88.89
Non-Breakpoint	231	95.67
Non-Breakpoint	231	85.34
Non-Breakpoint	231	96.54
Non-Breakpoint	231	95.67
Non-Breakpoint	231	84.91
Non-Breakpoint	231	96.54
Non-Breakpoint	232	96.12
Non-Breakpoint	231	96.54
Non-Breakpoint	1491	89.2
Non-Breakpoint	1526	88.34
Non-Breakpoint	1526	88.34
Non-Breakpoint	1462	90.22
Non-Breakpoint	1491	89.2
Non-Breakpoint	1462	90.22
Non-Breakpoint	176	89.89
Non-Breakpoint	133	91.79
Non-Breakpoint	129	87.69
Non-Breakpoint	208	92.79
Non-Breakpoint	163	87.35
Non-Breakpoint	233	85.41
Non-Breakpoint	389	81.63
Non-Breakpoint	202	96.6
Non-Breakpoint	195	97.46
Non-Breakpoint	195	97.97
Non-Breakpoint	183	90.91
Non-Breakpoint	129	97.67
Non-Breakpoint	128	98.44
Non-Breakpoint	131	97.71
Non-Breakpoint	140	97.14
Non-Breakpoint	281	89.08
Non-Breakpoint	177	89.89
Non-Breakpoint	135	91.24
Non-Breakpoint	133	87.41
Non-Breakpoint	186	87.63
Non-Breakpoint	183	87.63
Non-Breakpoint	100	95
Non-Breakpoint	97	94.9
Non-Breakpoint	79	100
Non-Breakpoint	79	100
Non-Breakpoint	77	100
Non-Breakpoint	1403	83.71
Non-Breakpoint	818	83.5
Non-Breakpoint	316	87.11
Non-Breakpoint	212	86.85
Non-Breakpoint	320	88.89
Non-Breakpoint	378	80.79
Non-Breakpoint	87	95.45
Non-Breakpoint	82	100
Non-Breakpoint	76	100
Non-Breakpoint	78	100
Non-Breakpoint	247	98.39
Non-Breakpoint	323	88.89
Non-Breakpoint	893	98.43
Non-Breakpoint	1233	89.17
Non-Breakpoint	1179	82.22
Non-Breakpoint	3987	96.19
Non-Breakpoint	892	98.43
Non-Breakpoint	72	98.61
Non-Breakpoint	471	99.15
Non-Breakpoint	484	87.01
Non-Breakpoint	331	86.71
Non-Breakpoint	331	93.05
Non-Breakpoint	470	100
Non-Breakpoint	470	100
Non-Breakpoint	470	99.15
Non-Breakpoint	470	92.99
Non-Breakpoint	470	92.14
Non-Breakpoint	471	93.43
Non-Breakpoint	473	93.02
Non-Breakpoint	450	85.11
Non-Breakpoint	231	96.54
Non-Breakpoint	370	85.71
Non-Breakpoint	336	94.96
Non-Breakpoint	287	96.53
Non-Breakpoint	287	92.83
Non-Breakpoint	289	93.6
Non-Breakpoint	1403	83.71
Non-Breakpoint	908	90.31
Non-Breakpoint	818	83.5
Non-Breakpoint	908	90.31
Non-Breakpoint	78	98.72
Non-Breakpoint	177	97.77
Non-Breakpoint	178	98.33
Non-Breakpoint	177	99.44
Non-Breakpoint	103	98.06
Non-Breakpoint	229	92.27
Non-Breakpoint	186	96.28
Non-Breakpoint	77	100
Non-Breakpoint	101	97.03
Non-Breakpoint	207	92.79
Non-Breakpoint	146	92.62
Non-Breakpoint	853	86.42
Non-Breakpoint	427	88.55
Non-Breakpoint	427	88.55
Non-Breakpoint	1161	89.42
Non-Breakpoint	250	92.8
Non-Breakpoint	251	95.22
Non-Breakpoint	251	94.82
Non-Breakpoint	251	91.24
Non-Breakpoint	252	93.24
Non-Breakpoint	252	93.24
Non-Breakpoint	149	96
Non-Breakpoint	667	83.98
Non-Breakpoint	471	99.15
Non-Breakpoint	471	87.5
Non-Breakpoint	331	86.71
Non-Breakpoint	331	93.05
Non-Breakpoint	470	99.57
Non-Breakpoint	470	95.15
Non-Breakpoint	470	99.15
Non-Breakpoint	470	93.84
Non-Breakpoint	470	93.84
Non-Breakpoint	470	92.99
Non-Breakpoint	470	92.98
Non-Breakpoint	454	84.8
Non-Breakpoint	232	96.12
Non-Breakpoint	82	98.8
Non-Breakpoint	82	98.78
Non-Breakpoint	82	97.62
Non-Breakpoint	113	92.11
Non-Breakpoint	112	93.75
Non-Breakpoint	397	93.47
Non-Breakpoint	395	95.45
Non-Breakpoint	397	93.22
Non-Breakpoint	186	89.36
Non-Breakpoint	98	94.9
Non-Breakpoint	79	98.73
Non-Breakpoint	81	100
Non-Breakpoint	81	97.53
Non-Breakpoint	85	97.65
Non-Breakpoint	76	100
Non-Breakpoint	89	95.51
Non-Breakpoint	113	91.23
Non-Breakpoint	92	91.58
Non-Breakpoint	86	94.19
Non-Breakpoint	133	89.55
Non-Breakpoint	101	98.02
Non-Breakpoint	101	96.04
Non-Breakpoint	96	95.88
Non-Breakpoint	98	98.99
Non-Breakpoint	92	100
Non-Breakpoint	92	100
Non-Breakpoint	483	81.28
Non-Breakpoint	78	100
Non-Breakpoint	209	97.61
Non-Breakpoint	204	98.53
Non-Breakpoint	206	96.6
Non-Breakpoint	116	93.97
Non-Breakpoint	101	98.02
Non-Breakpoint	97	95.88
Non-Breakpoint	96	97.94
Non-Breakpoint	862	86.42
Non-Breakpoint	290	92.81
Non-Breakpoint	287	89.2
Non-Breakpoint	285	88.81
Non-Breakpoint	246	91.16
Non-Breakpoint	281	97.87
Non-Breakpoint	197	91.18
Non-Breakpoint	280	98.58
Non-Breakpoint	166	94.05
Non-Breakpoint	243	93.06
Non-Breakpoint	349	89.71
Non-Breakpoint	351	86.48
Non-Breakpoint	283	96.47
Non-Breakpoint	281	96.09
Non-Breakpoint	281	96.09
Non-Breakpoint	281	96.09
Non-Breakpoint	281	95.73
Non-Breakpoint	281	95.37
Non-Breakpoint	327	94.8
Non-Breakpoint	320	87.72
Non-Breakpoint	73	100
Non-Breakpoint	105	92.38
Non-Breakpoint	101	97.03
Non-Breakpoint	97	95.88
Non-Breakpoint	97	97.94
Non-Breakpoint	90	97.78
Non-Breakpoint	89	98.88
Non-Breakpoint	89	97.75
Non-Breakpoint	85	98.82
Non-Breakpoint	84	96.47
Non-Breakpoint	1332	83.11
Non-Breakpoint	313	98.73
Non-Breakpoint	314	98.1
Non-Breakpoint	488	98.77
Non-Breakpoint	313	99.36
Non-Breakpoint	282	95.76
Non-Breakpoint	585	98.63
Non-Breakpoint	313	98.73
Non-Breakpoint	313	98.09
Non-Breakpoint	313	99.36
Non-Breakpoint	282	96.11
Non-Breakpoint	1105	80.34
Non-Breakpoint	1399	99.57
Non-Breakpoint	210	97.63
Non-Breakpoint	229	86.09
Non-Breakpoint	227	89.43
Non-Breakpoint	227	89.43
Non-Breakpoint	229	86.09
Non-Breakpoint	385	87.53
Non-Breakpoint	396	98.24
Non-Breakpoint	396	98.23
Non-Breakpoint	387	91.49
Non-Breakpoint	389	98.71
Non-Breakpoint	259	86.59
Non-Breakpoint	114	93.91
Non-Breakpoint	110	91.07
Non-Breakpoint	103	94.17
Non-Breakpoint	393	87.53
Non-Breakpoint	723	97.79
Non-Breakpoint	723	97.79
Non-Breakpoint	842	88.05
Non-Breakpoint	1136	88.64
Non-Breakpoint	1150	90.26
Non-Breakpoint	833	88.05
Non-Breakpoint	100	98.04
Non-Breakpoint	101	97.03
Non-Breakpoint	101	97.03
Non-Breakpoint	102	98.06
Non-Breakpoint	79	100
Non-Breakpoint	78	100
Non-Breakpoint	77	100
Non-Breakpoint	77	100
Non-Breakpoint	77	100
Non-Breakpoint	77	100
Non-Breakpoint	393	92.7
Non-Breakpoint	326	94.79
Non-Breakpoint	333	91.59
Non-Breakpoint	334	93.13
Non-Breakpoint	318	95.28
Non-Breakpoint	318	94.97
Non-Breakpoint	318	94.67
Non-Breakpoint	318	94.65
Non-Breakpoint	318	94.65
Non-Breakpoint	325	93.85
Non-Breakpoint	265	93.96
Non-Breakpoint	135	92.59
Non-Breakpoint	280	92.96
Non-Breakpoint	277	87.99
Non-Breakpoint	275	97.82
Non-Breakpoint	276	89.72
Non-Breakpoint	161	91.46
Non-Breakpoint	199	98.99
Non-Breakpoint	199	97.99
Non-Breakpoint	197	95.52
Non-Breakpoint	211	84.33
Non-Breakpoint	211	84.33
Non-Breakpoint	120	99.17
Non-Breakpoint	121	95.9
Non-Breakpoint	121	94.26
Non-Breakpoint	121	95.9
Non-Breakpoint	150	96
Non-Breakpoint	140	93.57
Non-Breakpoint	142	99.3
Non-Breakpoint	141	99.29
Non-Breakpoint	141	99.29
Non-Breakpoint	142	99.3
Non-Breakpoint	122	96.72
Non-Breakpoint	235	91.14
Non-Breakpoint	212	91.08
Non-Breakpoint	311	98.39
Non-Breakpoint	311	98.07
Non-Breakpoint	83	100
Non-Breakpoint	87	97.7
Non-Breakpoint	83	98.8
Non-Breakpoint	82	100
Non-Breakpoint	97	95.88
Non-Breakpoint	86	97.67
Non-Breakpoint	86	97.67
Non-Breakpoint	157	92.59
Non-Breakpoint	641	83
Non-Breakpoint	117	95.73
Non-Breakpoint	117	89.34
Non-Breakpoint	110	94.64
Non-Breakpoint	107	96.3
Non-Breakpoint	107	95.41
Non-Breakpoint	102	97.06
Non-Breakpoint	279	97.49
Non-Breakpoint	264	89.55
Non-Breakpoint	278	90.07
Non-Breakpoint	278	90.07
Non-Breakpoint	278	89.72
Non-Breakpoint	278	89.01
Non-Breakpoint	278	89.72
Non-Breakpoint	277	97.47
Non-Breakpoint	278	92.53
Non-Breakpoint	317	87.11
Non-Breakpoint	73	100
Non-Breakpoint	102	98.04
Non-Breakpoint	180	98.33
Non-Breakpoint	233	92.27
Non-Breakpoint	190	98.95
Non-Breakpoint	77	100
Non-Breakpoint	3213	99.53
Non-Breakpoint	1764	94.11
Non-Breakpoint	101	92.16
Non-Breakpoint	105	93.33
Non-Breakpoint	113	97.35
Non-Breakpoint	109	95.41
Non-Breakpoint	106	97.17
Non-Breakpoint	110	94.55
Non-Breakpoint	106	92.79
Non-Breakpoint	1271	83.98
Non-Breakpoint	1746	94.91
Non-Breakpoint	393	89.31
Non-Breakpoint	343	90.96
Non-Breakpoint	331	91.59
Non-Breakpoint	501	90.41
Non-Breakpoint	493	91.24
Non-Breakpoint	500	91.55
Non-Breakpoint	500	91.36
Non-Breakpoint	500	91.18
Non-Breakpoint	500	91.16
Non-Breakpoint	500	91.16
Non-Breakpoint	117	90.98
Non-Breakpoint	116	89.34
Non-Breakpoint	109	88.99
Non-Breakpoint	108	91.82
Non-Breakpoint	108	92.79
Non-Breakpoint	99	92.08
Non-Breakpoint	88	97.73
Non-Breakpoint	85	96.47
Non-Breakpoint	85	96.47
Non-Breakpoint	85	96.47
Non-Breakpoint	90	94.44
Non-Breakpoint	903	82.5
Non-Breakpoint	903	83.06
Non-Breakpoint	392	98.48
Non-Breakpoint	97	92.16
Non-Breakpoint	1288	92.39
Non-Breakpoint	1934	92.41
Non-Breakpoint	903	83.06
Non-Breakpoint	1288	92.39
Non-Breakpoint	1934	92.41
Non-Breakpoint	903	82.5
Non-Breakpoint	765	90.36
Non-Breakpoint	325	94.8
Non-Breakpoint	327	90.64
Non-Breakpoint	123	94.35
Non-Breakpoint	97	94.9
Non-Breakpoint	124	94.4
Non-Breakpoint	95	100
Non-Breakpoint	79	100
Non-Breakpoint	83	98.8
Non-Breakpoint	83	97.59
Non-Breakpoint	83	98.8
Non-Breakpoint	78	100
Non-Breakpoint	82	97.59
Non-Breakpoint	1277	83.98
Non-Breakpoint	217	97.7
Non-Breakpoint	101	93.07
Non-Breakpoint	210	98.57
Non-Breakpoint	146	96.58
Non-Breakpoint	83	97.59
Non-Breakpoint	1274	81.57
Non-Breakpoint	1295	81.57
Non-Breakpoint	537	93.85
Non-Breakpoint	279	89.08
Non-Breakpoint	1782	99.83
Non-Breakpoint	3030	99.7
Non-Breakpoint	3034	99.7
Non-Breakpoint	115	95.73
Non-Breakpoint	220	86.94
Non-Breakpoint	113	98.25
Non-Breakpoint	161	92.59
Non-Breakpoint	935	83.69
Non-Breakpoint	415	89.64
Non-Breakpoint	411	90.27
Non-Breakpoint	532	98.12
Non-Breakpoint	531	99.25
Non-Breakpoint	185	90.27
Non-Breakpoint	228	89.04
Non-Breakpoint	188	96.28
Non-Breakpoint	75	100
Non-Breakpoint	179	97.77
Non-Breakpoint	101	97.03
Non-Breakpoint	349	92.56
Non-Breakpoint	277	87.28
Non-Breakpoint	276	89.01
Non-Breakpoint	275	97.09
Non-Breakpoint	280	92.25
Non-Breakpoint	226	90.64
Non-Breakpoint	228	90.34
Non-Breakpoint	386	89.92
Non-Breakpoint	386	89.92
Non-Breakpoint	1746	98.34
Non-Breakpoint	377	84.66
Non-Breakpoint	295	84.85
Non-Breakpoint	120	99.17
Non-Breakpoint	89	95.51
Non-Breakpoint	83	97.59
Non-Breakpoint	82	100
Non-Breakpoint	107	98.13
Non-Breakpoint	188	89.36
Non-Breakpoint	106	98.13
Non-Breakpoint	98	94.9
Non-Breakpoint	77	100
Non-Breakpoint	81	97.53
Non-Breakpoint	259	98.46
Non-Breakpoint	255	98.82
Non-Breakpoint	258	91.86
Non-Breakpoint	141	99.29
Non-Breakpoint	248	94.82
Non-Breakpoint	251	99.2
Non-Breakpoint	248	94.35
Non-Breakpoint	236	87.34
Non-Breakpoint	122	94.26
Non-Breakpoint	121	95.04
Non-Breakpoint	112	92.11
Non-Breakpoint	84	97.65
Non-Breakpoint	90	95.56
Non-Breakpoint	82	96.39
Non-Breakpoint	96	98.97
Non-Breakpoint	97	96.91
Non-Breakpoint	97	97.96
Non-Breakpoint	65	100
Non-Breakpoint	94	96.81
Non-Breakpoint	342	90.64
Non-Breakpoint	333	87.72
Non-Breakpoint	336	84.66
Non-Breakpoint	376	96.33
Non-Breakpoint	250	90.84
Non-Breakpoint	288	96.53
Non-Breakpoint	259	91.54
Non-Breakpoint	278	97.49
Non-Breakpoint	263	87.69
Non-Breakpoint	278	88.34
Non-Breakpoint	278	87.99
Non-Breakpoint	278	87.28
Non-Breakpoint	278	88.34
Non-Breakpoint	278	87.99
Non-Breakpoint	277	97.84
Non-Breakpoint	276	90
Non-Breakpoint	135	92.59
Non-Breakpoint	2573	97.28
Non-Breakpoint	206	89.86
Non-Breakpoint	2577	97.28
Non-Breakpoint	480	93.33
Non-Breakpoint	85	97.67
Non-Breakpoint	517	99.23
Non-Breakpoint	79	100
Non-Breakpoint	509	99.61
Non-Breakpoint	509	99.41
Non-Breakpoint	241	89.71
Non-Breakpoint	508	99.61
Non-Breakpoint	508	99.41
Non-Breakpoint	508	98.43
Non-Breakpoint	508	91.55
Non-Breakpoint	509	99.61
Non-Breakpoint	407	94.62
Non-Breakpoint	318	95.28
Non-Breakpoint	1526	95.74
Non-Breakpoint	382	99.22
Non-Breakpoint	381	99.74
Non-Breakpoint	219	94.06
Non-Breakpoint	381	100
Non-Breakpoint	381	99.74
Non-Breakpoint	383	99.22
Non-Breakpoint	219	94.06
Non-Breakpoint	381	100
Non-Breakpoint	1526	95.74
Non-Breakpoint	351	88.45
Non-Breakpoint	348	89.71
Non-Breakpoint	296	82.57
Non-Breakpoint	256	88.42
Non-Breakpoint	221	85.41
Non-Breakpoint	301	82.57
Non-Breakpoint	113	91.23
Non-Breakpoint	87	94.25
Non-Breakpoint	82	97.56
Non-Breakpoint	82	100
Non-Breakpoint	81	100
Non-Breakpoint	80	98.75
Non-Breakpoint	86	97.7
Non-Breakpoint	81	97.59
Non-Breakpoint	111	93.75
Non-Breakpoint	81	98.77
Non-Breakpoint	121	95.04
Non-Breakpoint	84	97.67
Non-Breakpoint	89	95.56
Non-Breakpoint	81	98.78
Non-Breakpoint	81	97.56
Non-Breakpoint	80	98.77
Non-Breakpoint	88	96.67
Non-Breakpoint	86	97.67
Non-Breakpoint	85	97.65
Non-Breakpoint	83	98.8
Non-Breakpoint	86	97.7
Non-Breakpoint	1298	81.61
Non-Breakpoint	524	99.81
Non-Breakpoint	1830	99.89
Non-Breakpoint	86	94.19
Non-Breakpoint	86	94.25
Non-Breakpoint	91	91.58
Non-Breakpoint	130	89.55
Non-Breakpoint	100	97.03
Non-Breakpoint	101	93.14
Non-Breakpoint	96	95.88
Non-Breakpoint	518	99.23
Non-Breakpoint	511	99.61
Non-Breakpoint	509	99.61
Non-Breakpoint	509	99.61
Non-Breakpoint	509	99.41
Non-Breakpoint	509	99.02
Non-Breakpoint	509	98.43
Non-Breakpoint	509	91.18
Non-Breakpoint	408	94.38
Non-Breakpoint	319	94.67
Non-Breakpoint	241	89.71
Non-Breakpoint	77	100
Non-Breakpoint	209	97.61
Non-Breakpoint	197	97.46
Non-Breakpoint	196	99.49
Non-Breakpoint	2761	98.25
Non-Breakpoint	332	85.59
Non-Breakpoint	461	87.5
Non-Breakpoint	474	87.01
Non-Breakpoint	461	87.5
Non-Breakpoint	460	87.47
Non-Breakpoint	460	87.47
Non-Breakpoint	223	88.89
Non-Breakpoint	503	80.82
Non-Breakpoint	192	93.81
Non-Breakpoint	191	94.24
Non-Breakpoint	194	88.89
Non-Breakpoint	176	90.5
Non-Breakpoint	1385	80.16
Non-Breakpoint	1385	80.16
Non-Breakpoint	2042	99.61
Non-Breakpoint	117	95.73
Non-Breakpoint	118	92.5
Non-Breakpoint	507	80.82
Non-Breakpoint	374	96.79
Non-Breakpoint	374	95.19
Non-Breakpoint	266	90.64
Non-Breakpoint	297	93.6
Non-Breakpoint	264	88.68
Non-Breakpoint	86	97.67
Non-Breakpoint	98	97.96
Non-Breakpoint	97	98.97
Non-Breakpoint	327	84.66
Non-Breakpoint	1830	99.89
Non-Breakpoint	79	100
Non-Breakpoint	79	100
Non-Breakpoint	234	91.1
Non-Breakpoint	194	90.21
Non-Breakpoint	194	89.69
Non-Breakpoint	228	89.91
Non-Breakpoint	411	93.84
Non-Breakpoint	219	85.29
Non-Breakpoint	217	88.5
Non-Breakpoint	280	93.31
Non-Breakpoint	277	88.34
Non-Breakpoint	275	98.18
Non-Breakpoint	276	90.07
Non-Breakpoint	378	92.76
Non-Breakpoint	194	92.78
Non-Breakpoint	194	88.78
Non-Breakpoint	197	88.89
Non-Breakpoint	271	85.4
Non-Breakpoint	235	89.79
Non-Breakpoint	112	95.54
Non-Breakpoint	235	89.79
Non-Breakpoint	112	95.54
Non-Breakpoint	261	86.59
Non-Breakpoint	261	86.59
Non-Breakpoint	261	86.59
Non-Breakpoint	261	86.64
Non-Breakpoint	277	84.48
Non-Breakpoint	104	93.33
Non-Breakpoint	98	95.92
Non-Breakpoint	97	96.91
Non-Breakpoint	101	97.06
Non-Breakpoint	106	88.99
Non-Breakpoint	94	95.74
Non-Breakpoint	112	97.35
Non-Breakpoint	112	94.64
Non-Breakpoint	105	97.14
Non-Breakpoint	105	91.82
Non-Breakpoint	94	95.74
Non-Breakpoint	113	95.61
Non-Breakpoint	128	94.53
Non-Breakpoint	255	98.82
Non-Breakpoint	254	92.52
Non-Breakpoint	237	87.82
Non-Breakpoint	249	95.18
Non-Breakpoint	249	100
Non-Breakpoint	249	100
Non-Breakpoint	248	95.22
Non-Breakpoint	141	99.29
Non-Breakpoint	471	95.55
Non-Breakpoint	472	95.97
Non-Breakpoint	370	94.88
Non-Breakpoint	219	94.52
Non-Breakpoint	470	95.96
Non-Breakpoint	470	95.32
Non-Breakpoint	472	95.97
Non-Breakpoint	209	92.82
Non-Breakpoint	199	92.54
Non-Breakpoint	117	95.73
Non-Breakpoint	471	99.15
Non-Breakpoint	471	92.58
Non-Breakpoint	472	99.15
Non-Breakpoint	470	87.47
Non-Breakpoint	450	84.89
Non-Breakpoint	231	95.67
Non-Breakpoint	470	99.57
Non-Breakpoint	470	99.15
Non-Breakpoint	470	93.42
Non-Breakpoint	470	92.98
Non-Breakpoint	331	87.01
Non-Breakpoint	335	93.13
Non-Breakpoint	616	91.88
Non-Breakpoint	325	99.69
Non-Breakpoint	311	98.07
Non-Breakpoint	201	92.54
Non-Breakpoint	120	92.5
Non-Breakpoint	222	86.94
Non-Breakpoint	344	90.86
Non-Breakpoint	537	93.85
Non-Breakpoint	98	95.92
Non-Breakpoint	106	97.17
Non-Breakpoint	96	92.08
Non-Breakpoint	108	96.3
Non-Breakpoint	108	94.55
Non-Breakpoint	113	95.61
Non-Breakpoint	1068	99.53
Non-Breakpoint	1069	99.53
Non-Breakpoint	1147	90.26
Non-Breakpoint	1143	87.07
Non-Breakpoint	1333	83.11
Non-Breakpoint	354	86.48
Non-Breakpoint	355	88.45
Non-Breakpoint	89	97.75
Non-Breakpoint	89	96.63
Non-Breakpoint	90	96.67
Non-Breakpoint	87	97.73
Non-Breakpoint	85	97.65
Non-Breakpoint	1029	84.94
Non-Breakpoint	257	100
Non-Breakpoint	142	99.3
Non-Breakpoint	249	95.24
Non-Breakpoint	249	92.37
Non-Breakpoint	249	100
Non-Breakpoint	251	99.2
Non-Breakpoint	248	95.16
Non-Breakpoint	236	87.6
Non-Breakpoint	122	95.9
Non-Breakpoint	228	92.44
Non-Breakpoint	225	96.05
Non-Breakpoint	693	89.4
Non-Breakpoint	687	89.4
Non-Breakpoint	228	96.05
Non-Breakpoint	228	89.87
Non-Breakpoint	305	87.8
Non-Breakpoint	280	92.96
Non-Breakpoint	277	87.99
Non-Breakpoint	275	97.82
Non-Breakpoint	276	89.72
Non-Breakpoint	381	95.6
Non-Breakpoint	134	91.49
Non-Breakpoint	121	88.8
Non-Breakpoint	602	98.34
Non-Breakpoint	863	86.77
Non-Breakpoint	949	81.11
Non-Breakpoint	230	94.35
Non-Breakpoint	1492	83.08
Non-Breakpoint	949	81.11
Non-Breakpoint	1272	89.89
Non-Breakpoint	1275	89.89
Non-Breakpoint	1492	83.08
Non-Breakpoint	187	90.91
Non-Breakpoint	202	86.85
Non-Breakpoint	1263	86.65
Non-Breakpoint	508	100
Non-Breakpoint	507	99.01
Non-Breakpoint	508	100
Non-Breakpoint	507	99.01
Non-Breakpoint	617	85.14
Non-Breakpoint	494	87.45
Non-Breakpoint	1256	86.65
Non-Breakpoint	491	87.45
Non-Breakpoint	416	93.76
Non-Breakpoint	335	93.13
Non-Breakpoint	510	98.04
Non-Breakpoint	510	90.41
Non-Breakpoint	509	98.43
Non-Breakpoint	509	98.43
Non-Breakpoint	509	98.04
Non-Breakpoint	509	97.84
Non-Breakpoint	510	98.04
Non-Breakpoint	509	98.04
Non-Breakpoint	241	88.89
Non-Breakpoint	65	100
Non-Breakpoint	94	96.81
Non-Breakpoint	153	92.16
Non-Breakpoint	208	92.79
Non-Breakpoint	2421	87.16
Non-Breakpoint	141	92.91
Non-Breakpoint	3805	93.86
Non-Breakpoint	2454	85.49
Non-Breakpoint	2453	87.16
Non-Breakpoint	6474	92.13
Non-Breakpoint	2389	85.41
Non-Breakpoint	3811	93.86
Non-Breakpoint	141	92.91
Non-Breakpoint	629	83
Non-Breakpoint	508	99.61
Non-Breakpoint	508	99.61
Non-Breakpoint	508	99.61
Non-Breakpoint	508	99.41
Non-Breakpoint	508	91.16
Non-Breakpoint	509	99.61
Non-Breakpoint	509	99.02
Non-Breakpoint	508	98.04
Non-Breakpoint	407	94.13
Non-Breakpoint	318	94.65
Non-Breakpoint	245	89.07
Non-Breakpoint	78	100
Non-Breakpoint	489	98.77
Non-Breakpoint	314	98.73
Non-Breakpoint	283	96.11
Non-Breakpoint	586	98.63
Non-Breakpoint	314	98.73
Non-Breakpoint	314	100
Non-Breakpoint	314	98.73
Non-Breakpoint	283	96.11
Non-Breakpoint	132	91.24
Non-Breakpoint	123	92.68
Non-Breakpoint	141	91.49
Non-Breakpoint	1297	82.62
Non-Breakpoint	1297	82.62
Non-Breakpoint	336	87.8
Non-Breakpoint	180	90.71
Non-Breakpoint	190	94.24
Non-Breakpoint	190	93.75
Non-Breakpoint	190	92.78
Non-Breakpoint	258	88.42
Non-Breakpoint	212	91.08
Non-Breakpoint	381	96.33
Non-Breakpoint	251	88.84
Non-Breakpoint	293	92.83
Non-Breakpoint	372	96.79
Non-Breakpoint	264	89.81
Non-Breakpoint	635	88.68
Non-Breakpoint	644	88.68
Non-Breakpoint	372	80.79
Non-Breakpoint	471	83.72
Non-Breakpoint	472	99.36
Non-Breakpoint	472	86.23
Non-Breakpoint	470	100
Non-Breakpoint	470	95.96
Non-Breakpoint	470	100
Non-Breakpoint	472	99.58
Non-Breakpoint	159	85.88
Non-Breakpoint	803	92.5
Non-Breakpoint	374	94.68
Non-Breakpoint	470	99.58
Non-Breakpoint	470	99.36
Non-Breakpoint	470	100
Non-Breakpoint	471	100
Non-Breakpoint	472	95.97
Non-Breakpoint	467	86.3
Non-Breakpoint	464	83.91
Non-Breakpoint	159	85.88
Non-Breakpoint	285	96.5
Non-Breakpoint	287	99.65
Non-Breakpoint	337	99.41
Non-Breakpoint	280	98.21
Non-Breakpoint	280	96.09
Non-Breakpoint	281	95.74
Non-Breakpoint	679	99.85
Non-Breakpoint	301	97.01
Non-Breakpoint	288	99.65
Non-Breakpoint	287	98.95
Non-Breakpoint	280	98.21
Non-Breakpoint	280	96.09
Non-Breakpoint	281	95.74
Non-Breakpoint	247	89.07
Non-Breakpoint	244	89.75
Non-Breakpoint	243	89.71
Non-Breakpoint	243	89.71
Non-Breakpoint	243	89.71
Non-Breakpoint	243	88.89
Non-Breakpoint	243	89.3
Non-Breakpoint	236	89.41
Non-Breakpoint	208	92.79
Non-Breakpoint	98	93.07
Non-Breakpoint	152	92.16
Non-Breakpoint	276	92.5
Non-Breakpoint	147	97.28
Non-Breakpoint	264	98.11
Non-Breakpoint	275	98.55
Non-Breakpoint	275	98.18
Non-Breakpoint	275	97.82
Non-Breakpoint	275	97.82
Non-Breakpoint	275	97.09
Non-Breakpoint	283	96.11
Non-Breakpoint	283	96.11
Non-Breakpoint	283	95.41
Non-Breakpoint	283	96.11
Non-Breakpoint	283	95.76
Non-Breakpoint	1292	88.49
Non-Breakpoint	828	82.61
Non-Breakpoint	1298	81.61
Non-Breakpoint	827	82.61
Non-Breakpoint	1850	84.99
Non-Breakpoint	478	93.53
Non-Breakpoint	471	93.43
Non-Breakpoint	472	87.74
Non-Breakpoint	231	85.34
Non-Breakpoint	470	99.15
Non-Breakpoint	470	93.84
Non-Breakpoint	470	93.42
Non-Breakpoint	470	93.42
Non-Breakpoint	470	98.72
Non-Breakpoint	331	86.71
Non-Breakpoint	335	92.84
Non-Breakpoint	271	85.4
Non-Breakpoint	1293	88.49
Non-Breakpoint	208	100
Non-Breakpoint	210	98.57
Non-Breakpoint	141	97.87
Non-Breakpoint	89	96.63
Non-Breakpoint	3573	96.28
Non-Breakpoint	661	90.83
Non-Breakpoint	471	92.58
Non-Breakpoint	471	92.16
Non-Breakpoint	472	92.18
Non-Breakpoint	470	92.99
Non-Breakpoint	470	92.14
Non-Breakpoint	470	86.84
Non-Breakpoint	470	98.72
Non-Breakpoint	332	86.14
Non-Breakpoint	332	92.47
Non-Breakpoint	669	92.99
Non-Breakpoint	786	89.97
Non-Breakpoint	834	84.51
Non-Breakpoint	428	83.72
Non-Breakpoint	428	83.09
Non-Breakpoint	421	83.48
Non-Breakpoint	421	83.91
Non-Breakpoint	421	83.91
Non-Breakpoint	405	89.88
Non-Breakpoint	344	83.64
Non-Breakpoint	209	92.82
Non-Breakpoint	3573	96.28
Non-Breakpoint	669	92.99
Non-Breakpoint	781	99.36
Non-Breakpoint	126	100
Non-Breakpoint	126	97.62
Non-Breakpoint	131	97.71
Non-Breakpoint	132	98.48
Non-Breakpoint	212	94.34
Non-Breakpoint	221	95.48
Non-Breakpoint	427	85.56
Non-Breakpoint	428	86.23
Non-Breakpoint	443	85.48
Non-Breakpoint	423	86.3
Non-Breakpoint	219	94.52
Non-Breakpoint	423	86.3
Non-Breakpoint	404	89.88
Non-Breakpoint	173	93.64
Non-Breakpoint	333	93.13
Non-Breakpoint	333	92.84
Non-Breakpoint	665	92.05
Non-Breakpoint	332	93.11
Non-Breakpoint	332	92.81
Non-Breakpoint	330	92.47
Non-Breakpoint	329	93.05
Non-Breakpoint	329	93.05
Non-Breakpoint	329	92.15
Non-Breakpoint	329	93.05
Non-Breakpoint	147	95.27
Non-Breakpoint	147	97.28
Non-Breakpoint	219	94.06
Non-Breakpoint	381	99.74
Non-Breakpoint	381	99.74
Non-Breakpoint	217	89.38
Non-Breakpoint	127	93.75
Non-Breakpoint	72	98.61
Non-Breakpoint	121	94.21
Non-Breakpoint	230	94.35
Non-Breakpoint	616	91.88
Non-Breakpoint	792	80.4
Non-Breakpoint	119	92.68
Non-Breakpoint	117	88.43
Non-Breakpoint	602	98.34
Non-Breakpoint	1182	90.89
Non-Breakpoint	282	91.52
Non-Breakpoint	1439	94
Non-Breakpoint	80	98.77
Non-Breakpoint	82	98.8
Non-Breakpoint	76	100
Non-Breakpoint	453	83.92
Non-Breakpoint	338	86.98
Non-Breakpoint	334	93.11
Non-Breakpoint	473	93.04
Non-Breakpoint	471	87.5
Non-Breakpoint	472	92.18
Non-Breakpoint	470	100
Non-Breakpoint	470	95.15
Non-Breakpoint	470	93.42
Non-Breakpoint	471	99.15
Non-Breakpoint	470	92.98
Non-Breakpoint	471	100
Non-Breakpoint	450	85.11
Non-Breakpoint	231	96.54
Non-Breakpoint	476	92.87
Non-Breakpoint	472	99.15
Non-Breakpoint	470	100
Non-Breakpoint	470	99.15
Non-Breakpoint	470	93.42
Non-Breakpoint	471	92.16
Non-Breakpoint	470	92.98
Non-Breakpoint	471	100
Non-Breakpoint	470	87.47
Non-Breakpoint	331	93.05
Non-Breakpoint	331	86.71
Non-Breakpoint	450	85.11
Non-Breakpoint	231	96.54
Non-Breakpoint	235	88.98
Non-Breakpoint	126	99.21
Non-Breakpoint	126	98.41
Non-Breakpoint	132	98.48
Non-Breakpoint	140	97.14
Non-Breakpoint	205	97.56
Non-Breakpoint	294	96.6
Non-Breakpoint	1349	99.11
Non-Breakpoint	529	89.81
Non-Breakpoint	379	90.7
Non-Breakpoint	385	91.21
Non-Breakpoint	386	91.49
Non-Breakpoint	385	91.75
Non-Breakpoint	395	91.46
Non-Breakpoint	276	84.48
Non-Breakpoint	538	89.81
Non-Breakpoint	1345	99.11
Non-Breakpoint	294	96.6
Non-Breakpoint	205	97.56
Non-Breakpoint	140	98.57
Non-Breakpoint	2681	88.26
Non-Breakpoint	2664	86.89
Non-Breakpoint	749	81.14
Non-Breakpoint	2682	88.26
Non-Breakpoint	511	85.16
Non-Breakpoint	191	84.29
Non-Breakpoint	2030	85.8
Non-Breakpoint	83	100
Non-Breakpoint	83	98.8
Non-Breakpoint	85	98.82
Non-Breakpoint	76	100
Non-Breakpoint	483	81.28
Non-Breakpoint	257	91.86
Non-Breakpoint	253	92.52
Non-Breakpoint	248	93.95
Non-Breakpoint	248	92.37
Non-Breakpoint	248	92.37
Non-Breakpoint	247	91.24
Non-Breakpoint	122	96.72
Non-Breakpoint	208	94.71
Non-Breakpoint	218	93.61
Non-Breakpoint	218	94.06
Non-Breakpoint	218	94.06
Non-Breakpoint	218	94.06
Non-Breakpoint	2030	85.8
Non-Breakpoint	2661	86.89
Non-Breakpoint	1105	80.34
Non-Breakpoint	781	82.76
Non-Breakpoint	511	85.16
Non-Breakpoint	204	91.18
Non-Breakpoint	204	91.18
Non-Breakpoint	176	92.61
Non-Breakpoint	203	92.61
Non-Breakpoint	200	91.5
Non-Breakpoint	517	90.73
Non-Breakpoint	414	93.51
Non-Breakpoint	325	93.85
Non-Breakpoint	509	98.04
Non-Breakpoint	508	99.41
Non-Breakpoint	508	99.41
Non-Breakpoint	508	99.41
Non-Breakpoint	508	99.41
Non-Breakpoint	508	98.82
Non-Breakpoint	508	99.41
Non-Breakpoint	242	89.75
Non-Breakpoint	77	100
Non-Breakpoint	932	83.69
Non-Breakpoint	776	82.76
Non-Breakpoint	191	84.29
Non-Breakpoint	741	81.14
Non-Breakpoint	3984	99.52
Non-Breakpoint	2733	97.7
Non-Breakpoint	3708	98.41
Non-Breakpoint	2732	97.7
Non-Breakpoint	3708	98.41
Non-Breakpoint	396	91.46
Non-Breakpoint	389	98.71
Non-Breakpoint	389	98.46
Non-Breakpoint	389	98.97
Non-Breakpoint	259	86.59
Non-Breakpoint	130	90.84
Non-Breakpoint	130	90.84
Non-Breakpoint	1705	98.19
Non-Breakpoint	509	98.04
Non-Breakpoint	241	89.3
Non-Breakpoint	77	100
Non-Breakpoint	508	99.61
Non-Breakpoint	508	99.61
Non-Breakpoint	508	99.61
Non-Breakpoint	508	99.61
Non-Breakpoint	508	91.16
Non-Breakpoint	508	99.41
Non-Breakpoint	509	99.02
Non-Breakpoint	406	94.36
Non-Breakpoint	318	94.97
Non-Breakpoint	117	95.73
Non-Breakpoint	781	99.36
Non-Breakpoint	1133	88.64
Non-Breakpoint	1145	87.07
Non-Breakpoint	1713	98.19
Non-Breakpoint	429	88.24
Non-Breakpoint	280	91.52
Non-Breakpoint	1449	94
Non-Breakpoint	96	91.67
Non-Breakpoint	94	91.67
Non-Breakpoint	372	84.66
Non-Breakpoint	91	89.36
Non-Breakpoint	102	93.33
Non-Breakpoint	104	94.29
Non-Breakpoint	102	94.17
Non-Breakpoint	91	89.36
Non-Breakpoint	88	95.45
Non-Breakpoint	83	97.59
Non-Breakpoint	87	97.7
Non-Breakpoint	85	98.82
Non-Breakpoint	83	97.59
Non-Breakpoint	92	100
Non-Breakpoint	93	100
Non-Breakpoint	91	100
Non-Breakpoint	92	100
Non-Breakpoint	91	100
Non-Breakpoint	91	100
Non-Breakpoint	837	84.51
Non-Breakpoint	786	89.97
Non-Breakpoint	1878	93.26
Non-Breakpoint	1869	93.26
Non-Breakpoint	331	97.58
Non-Breakpoint	428	96.5
Non-Breakpoint	411	90.27
Non-Breakpoint	99	98.99
Non-Breakpoint	97	96.91
Non-Breakpoint	93	100
Non-Breakpoint	91	100
Non-Breakpoint	473	93.02
Non-Breakpoint	472	87.74
Non-Breakpoint	459	88.45
Non-Breakpoint	231	95.67
Non-Breakpoint	470	92.98
Non-Breakpoint	470	92.98
Non-Breakpoint	470	86.84
Non-Breakpoint	470	92.98
Non-Breakpoint	470	92.98
Non-Breakpoint	470	87.26
Non-Breakpoint	331	92.15
Non-Breakpoint	331	92.15
Non-Breakpoint	234	88.98
Non-Breakpoint	3262	97.73
Non-Breakpoint	314	98.73
Non-Breakpoint	313	98.1
Non-Breakpoint	281	95.41
Non-Breakpoint	312	98.73
Non-Breakpoint	312	98.09
Non-Breakpoint	94	95.88
Non-Breakpoint	97	94.85
Non-Breakpoint	97	94.85
Non-Breakpoint	531	99.25
Non-Breakpoint	532	97.37
Non-Breakpoint	3246	97.73
Non-Breakpoint	818	87.16
Non-Breakpoint	86	95.51
Non-Breakpoint	79	98.75
Non-Breakpoint	89	95.56
Non-Breakpoint	77	100
Non-Breakpoint	815	87.16
Non-Breakpoint	628	80.54
Non-Breakpoint	85	97.67
Non-Breakpoint	96	94.85
Non-Breakpoint	103	100
Non-Breakpoint	96	94.85
Non-Breakpoint	85	97.67
Non-Breakpoint	112	93.97
Non-Breakpoint	102	92.38
Non-Breakpoint	101	93.14
Non-Breakpoint	99	96.04
Non-Breakpoint	139	92.81
Non-Breakpoint	139	92.81
Non-Breakpoint	125	88.8
Non-Breakpoint	125	87.69
Non-Breakpoint	130	95.38
Non-Breakpoint	130	87.41
Non-Breakpoint	121	88.43
Non-Breakpoint	97	96.91
Non-Breakpoint	105	97.17
Non-Breakpoint	104	97.17
Non-Breakpoint	104	97.14
Non-Breakpoint	115	95.73
Non-Breakpoint	116	90.98
Non-Breakpoint	82	97.59
Non-Breakpoint	81	97.56
Non-Breakpoint	81	97.53
Non-Breakpoint	81	97.53
Non-Breakpoint	89	95.56
Non-Breakpoint	95	95.79
Non-Breakpoint	90	94.44
Non-Breakpoint	83	97.59
Non-Breakpoint	89	96.63
Non-Breakpoint	165	95.76
Non-Breakpoint	199	97.49
Non-Breakpoint	294	100
Non-Breakpoint	165	95.76
Non-Breakpoint	76	96.05
Non-Breakpoint	388	83.25
Non-Breakpoint	156	87.97
Non-Breakpoint	128	90.7
Non-Breakpoint	373	83.25
Non-Breakpoint	93	95.7
Non-Breakpoint	92	95.7
Non-Breakpoint	153	87.97
Non-Breakpoint	87	94.44
Non-Breakpoint	124	90.7
Non-Breakpoint	186	83.25
Non-Breakpoint	189	83.25
Non-Breakpoint	74	96.05
Non-Breakpoint	89	94.44
Non-Breakpoint	71	100
Non-Breakpoint	199	97.49
Non-Breakpoint	294	100
Non-Breakpoint	71	100
Non-Breakpoint	78	100
Non-Breakpoint	488	85.48
Non-Breakpoint	473	99.58
Non-Breakpoint	472	98.94
Non-Breakpoint	465	83.48
Non-Breakpoint	471	99.58
Non-Breakpoint	472	95.55
Non-Breakpoint	472	99.58
Non-Breakpoint	371	94.35
Non-Breakpoint	160	86.44
Non-Breakpoint	103	93.2
Non-Breakpoint	265	93.96
Non-Breakpoint	248	98.39
Non-Breakpoint	281	98.58
Non-Breakpoint	280	97.86
Non-Breakpoint	244	92.65
Non-Breakpoint	194	91.5
Non-Breakpoint	167	93.45
Non-Breakpoint	144	96.58
Non-Breakpoint	90	94.44
Non-Breakpoint	140	97.87
Non-Breakpoint	140	97.87
Non-Breakpoint	172	97.09
Non-Breakpoint	198	92.61
Non-Breakpoint	245	93.47
Non-Breakpoint	245	93.06
Non-Breakpoint	245	92.65
Non-Breakpoint	475	92.87
Non-Breakpoint	334	86.53
Non-Breakpoint	334	92.81
Non-Breakpoint	473	93.04
Non-Breakpoint	471	98.73
Non-Breakpoint	470	99.15
Non-Breakpoint	470	93.84
Non-Breakpoint	470	93.42
Non-Breakpoint	470	92.99
Non-Breakpoint	470	87.26
Non-Breakpoint	231	84.91
Non-Breakpoint	509	99.41
Non-Breakpoint	509	99.02
Non-Breakpoint	508	99.02
Non-Breakpoint	508	99.02
Non-Breakpoint	508	97.84
Non-Breakpoint	508	98.82
Non-Breakpoint	509	99.02
Non-Breakpoint	235	89.41
Non-Breakpoint	502	91.24
Non-Breakpoint	407	94.38
Non-Breakpoint	326	94.79
Non-Breakpoint	386	90.7
Non-Breakpoint	90	96.67
Non-Breakpoint	84	97.62
Non-Breakpoint	83	97.59
Non-Breakpoint	83	96.39
Non-Breakpoint	82	97.56
Non-Breakpoint	345	90.86
Non-Breakpoint	88	86.36
Non-Breakpoint	85	86.36
Non-Breakpoint	285	93.71
Non-Breakpoint	285	88.81
Non-Breakpoint	184	90.32
Non-Breakpoint	183	90.71
Non-Breakpoint	179	90.5
Non-Breakpoint	290	92.81
Non-Breakpoint	532	97.37
Non-Breakpoint	532	98.12
Non-Breakpoint	285	95.79
Non-Breakpoint	281	96.09
Non-Breakpoint	281	95.37
Non-Breakpoint	282	95.74
Non-Breakpoint	282	95.74
Non-Breakpoint	282	95.04
Non-Breakpoint	199	97.99
Non-Breakpoint	199	97.99
Non-Breakpoint	335	87.46
Non-Breakpoint	252	91.54
Non-Breakpoint	252	90.64
Non-Breakpoint	252	89.81
Non-Breakpoint	330	94.96
Non-Breakpoint	471	99.58
Non-Breakpoint	472	95.97
Non-Breakpoint	370	94.88
Non-Breakpoint	467	86.3
Non-Breakpoint	470	100
Non-Breakpoint	470	99.36
Non-Breakpoint	471	100
Non-Breakpoint	464	83.91
Non-Breakpoint	159	85.88
Non-Breakpoint	117	91.6
Non-Breakpoint	119	91.6
Non-Breakpoint	172	97.09
Non-Breakpoint	171	92.61
Non-Breakpoint	168	94.05
Non-Breakpoint	168	94.05
Non-Breakpoint	168	93.45
Non-Breakpoint	173	93.64
Non-Breakpoint	449	88.45
Non-Breakpoint	301	84.24
Non-Breakpoint	444	84.8
Non-Breakpoint	440	85.11
Non-Breakpoint	440	84.89
Non-Breakpoint	440	85.11
Non-Breakpoint	440	85.11
Non-Breakpoint	231	90.48
Non-Breakpoint	398	98.49
Non-Breakpoint	397	98.24
Non-Breakpoint	387	91.75
Non-Breakpoint	390	98.97
Non-Breakpoint	260	86.64
Non-Breakpoint	301	87.46
Non-Breakpoint	330	85.71
Non-Breakpoint	242	88.68
Non-Breakpoint	235	90.84
Non-Breakpoint	230	88.84
Non-Breakpoint	861	80.6
Non-Breakpoint	861	82.49
Non-Breakpoint	498	91.68

## Sheet: Figure 6-figure supplement 1A
These data were used to generate Figure 6-figure supplement 1A. No breakpoints occurred at Retrotransposons.
Statistics found to the right of the data tables.
* p<0.05, **p<0.01, ***p<0.001, ****p<0.0001
	n= 3	n= 112		n= 33	n=306		n= 11	n= 764		n= 6	n= 328			Figure 6-figure supplement 1A Intergenic Sequence Analysis				Figure 6C All Breakpoint Kurskal-Wallis
	Intergenic Breakpoint	Intergenic Non-Breakpoint		ORF Breakpoint	ORF Non-Breakpoint		LTR Breakpoint	LTR Non-Breakpoint		tRNA Breakpoint	tRNA Non-Breakpoint			Null Hypothesis: There is no significant difference between the distributions of sequence identity of long repeat sequences containing intergenic sequence found within 2 kb of a breakpoint and long repeat sequences containing intergenic sequence not found within 2 kb of a breakpoint.				Null Hypothesis: There is no significant difference between the distributions of sequence identity of long repeat sequences found within 2 kb of a breakpoint of all genomic features.
	99.81	95.48		99.53	84.99		93.66	90.73		97.64	91.79							Table Analyzed	Figure 6 - Supplemental 1B
	98.73	94.4		99.32	92.35		93.33	93.22		99.44	95.51			Intergenic Breakpoint
	100	100		97.81	97.45		94.53	92.41		98.95	100			vs.				Kruskal-Wallis test
		100		96.19	92.5		95.19	99.74		98.73	98.77			Intergenic Non-Breakpoint				P value	0.0354
		92.62		99.13	92.5		93.53	93.47		100	93.91							Exact or approximate P value?	Approximate
		84.24		98.34	83.92		94.71	92.66		95.38	94.29			Kolmogorov-Smirnov test				P value summary	*
		85.59		97.64	95		94.88	99.74			95.24			P value	0.0228			Do the medians vary signif. (P < 0.05)	Yes
		94.34		99.02	100		98.73	94.13			97.78			Exact or approximate P value?	Approximate			Number of groups	4
		89.86		89.17	92.61		91.87	83.09			96.63			P value summary	*			Kruskal-Wallis statistic	8.581
		83.64		97.45	97.64		89.64	99.36			96.91			Significantly different? (P < 0.05)	Yes
		97.63		94.91	88.24		99.69	85.56			97.67			Kolmogorov-Smirnov D	0.875			Data summary
		90.48		99.13	84.85			99.36			94.44							Number of treatments (columns)	4
		88.89		94.11	82.59			99.36			98.97			Figure 6-figure supplement 1A ORF Analysis				Number of values (total)	53
		85.41		91.89	82.59			95.32			98.97			Null Hypothesis: There is no significant difference between the distributions of sequence identity of long repeat sequences containing ORFs found within 2 kb of a breakpoint and long repeat sequences containing ORFs not found within 2 kb of a breakpoint.
		89.08		86.77	90.96			98.94			98.82
		86.85		85.14	89.31			85.31			97.67			ORF Breakpoint
		98.39		92.13	97.58			93.57			98.86			vs.
		98.61		91.13	96.5			92.8			96.47			ORF Non-Breakpoint
		92.62		82.22	89.64			95.16			97.65
		89.71		99.52	89.78			94.35			100			Kolmogorov-Smirnov test
		86.48		93.78	80.54			95.18			100			P value	< 0.0001
		97.63		91.46	81.63			93.95			100			Exact or approximate P value?	Approximate
		87.53		91.46	89.42			95.16			98.72			P value summary	****
		87.53		83.98	82.99			98.39			86.67			Significantly different? (P < 0.05)	Yes
		91.14		99.83	82.99			98.53			84.87			Kolmogorov-Smirnov D	0.4335
		91.08		99.32	84.41			99.49			100
		94.35		90.83	84.41			97.97			99.21			Figure 6-figure supplement 1A LTR Analysis
		94.4		93.76	88			94.88			98.44			Null Hypothesis: There is no significant difference between the distributions of sequence identity of long repeat sequences containing LTRs found within 2 kb of a breakpoint and long repeat sequences containing LTRs not found within 2 kb of a breakpoint.
		100		93.76	92.76			94.88			91.07
		89.08		97.81	95.6			94.35			93.33			LTR Break
		86.94		96.47	92.05			94.88			95.24			vs.
		97.84		99.34	96.15			94.13			82.05			LTR NonBreak
		89.86		96.35	91.46			94.68			84.87
		88.45			92.56			98.23			86.67			Kolmogorov-Smirnov test
		89.71			95.24			98.49			82.05			P value	0.5062
		88.42			95.52			98.46			97.65			Exact or approximate P value?	Approximate
		85.41			92.61			91.21			98.8			P value summary	ns
		99.81			99.02			86.59			100			Significantly different? (P < 0.05)	No
		85.59			84.94			95.45			97.67			Kolmogorov-Smirnov D	0.2501
		88.89			99.57			92.41			98.41
		80.82			83.14			92.66			97.62			Figure 6-figure supplement 1A tRNA Analysis
		95.73			81.51			90.34			97.64			Null Hypothesis: There is no significant difference between the distributions of sequence identity of long repeat sequences containing LTRs found within 2 kb of a breakpoint and long repeat sequences containing LTRs not found within 2 kb of a breakpoint.
		92.5			88.4			90.64			98.57
		80.82			83.14			85.29			98.25			tRNA Breakpoint
		100			81.51			92.44			96.91			vs.
		100			88.4			89.87			98.86			tRNA Non-Breakpoint
		91.1			96.47			90.64			96.47
		92.54			91.13			93.75			96.67			Kolmogorov-Smirnov test
		95.73			90.36			94.21			98.88			P value	0.2286
		92.54			92.41			97.15			89.89			Exact or approximate P value?	Approximate
		92.5			92.41			88.5			91.79			P value summary	ns
		86.94			90.89			89.38			87.69			Significantly different? (P < 0.05)	No
		86.48			92.35			89.33			97.67			Kolmogorov-Smirnov D	0.4289
		88.45			84.51			87.79			98.44
		96.05			93.78			96.47			97.71			* p<0.05, **p<0.01, ***p<0.001, ****p<0.0001
		89.4			84.51			98.21			97.14
		89.4			98.48			98.21			89.89
		96.05			89.78			95.79			91.24
		94.35			80.68			97.5			87.41
		86.85			80.47			91.87			95.45
		92.91			80.47			94.62			100
		92.91			84.04			94.38			100
		96.11			84.04			93.76			100
		98.73			98			94.13			98.72
		100			98			93.51			97.77
		96.11			99.85			94.38			98.33
		88.42			95.24			94.38			99.44
		91.08			89.2			94.36			98.06
		96.11			88.34			92.7			92.27
		96.11			88.34			87.35			96.28
		95.41			90.22			93.31			100
		89.88			89.2			92.96			97.03
		83.64			90.22			92.96			98.8
		94.34			81.63			92.25			98.78
		95.48			87.63			92.53			97.62
		89.88			87.63			90			92.11
		93.64			95			90.04			93.75
		98.61			94.9			92.5			89.36
		94.35			100			93.23			94.9
		92.61			100			95.27			98.73
		98.73			100			89.64			100
		95.41			83.71			91.16			97.53
		98.73			83.5			83.71			97.65
		94.44			87.11			86.71			100
		95.76			88.89			86.71			95.51
		97.49			80.79			87.01			91.23
		100			88.89			86.71			91.58
		95.76			98.43			86.14			94.19
		96.05			89.17			92.15			89.55
		83.25			82.22			86.53			98.02
		87.97			96.19			86.71			96.04
		90.7			98.43			86.98			95.88
		83.25			83.71			85.88			98.99
		95.7			90.31			86.44			100
		95.7			83.5			85.88			100
		87.97			90.31			85.31			100
		94.44			86.42			85.88			93.97
		90.7			88.55			98.99			98.02
		83.25			88.55			97.99			95.88
		83.25			89.42			97.86			97.94
		96.05			83.98			97.87			100
		94.44			81.28			83.41			92.38
		100			86.42			93.47			97.03
		97.49			92.81			91.18			95.88
		100			83.11			94.05			97.94
		100			80.34			99.01			97.78
		98.39			99.57			99.01			98.88
		94.44			86.09			90.04			97.75
		92.61			89.43			97.47			98.82
		93.64			89.43			97.84			96.47
		84.24			86.09			98.46			93.91
		90.48			97.79			100			91.07
					97.79			95.9			94.17
					88.05			87.6			98.04
					88.64			100			97.03
					90.26			92.37			97.03
					88.05			95.16			98.06
					91.46			95.24			99.17
					95.52			99.3			100
					84.33			99.61			97.7
					84.33			89.71			98.8
					83			100			100
					87.11			99.61			95.88
					99.53			99.61			97.67
					94.11			99.41			97.67
					83.98			99.02			92.59
					94.91			98.04			95.73
					89.31			91.36			89.34
					90.96			99.61			94.64
					82.5			94.38			96.3
					83.06			94.65			95.41
					98.48			97.7			97.06
					92.39			100			100
					92.41			97.87			98.04
					83.06			95.79			98.33
					92.39			89.2			92.27
					92.41			93.71			98.95
					82.5			93.81			100
					90.36			93.75			92.16
					94.9			88.78			93.33
					100			90.32			97.35
					83.98			99.22			95.41
					81.57			93.61			97.17
					81.57			99.22			94.55
					93.85			87.69			92.79
					99.83			89.55			90.98
					99.7			93.23			89.34
					99.7			98.11			88.99
					83.69			95.73			91.82
					89.64			95.37			92.79
					90.27			95.79			92.08
					90.27			96.5			97.73
					89.04			97.01			96.47
					92.56			99.41			96.47
					89.92			98.95			96.47
					89.92			95.04			94.44
					98.34			95.37			92.16
					84.66			97.5			98.8
					84.85			95.79			97.59
					100			89.33			98.8
					96.81			93.66			100
					97.28			88.34			97.59
					97.28			98.55			95.73
					95.74			90.07			98.25
					95.74			95.67			92.59
					82.57			85.34			96.28
					82.57			96.54			100
					81.61			95.67			97.77
					99.89			84.91			97.03
					98.25			96.54			99.17
					80.16			96.12			95.51
					80.16			92.79			97.59
					99.61			87.35			100
					99.89			96.6			98.13
					90.21			97.46			89.36
					89.69			97.97			98.13
					89.91			90.91			94.9
					93.84			99.15			100
					92.76			87.01			97.53
					85.4			86.71			95.04
					89.79			93.05			92.11
					95.54			100			97.65
					89.79			100			95.56
					95.54			99.15			96.39
					91.88			92.99			98.97
					90.86			92.14			96.91
					93.85			93.43			97.96
					99.53			93.02			97.67
					99.53			85.11			91.23
					90.26			96.54			94.25
					87.07			85.71			97.56
					83.11			94.96			100
					84.94			96.53			100
					87.8			92.83			98.75
					95.6			93.6			97.7
					98.34			92.79			97.59
					86.77			92.8			93.75
					81.11			95.22			98.77
					83.08			94.82			95.04
					81.11			91.24			97.67
					89.89			93.24			95.56
					89.89			93.24			98.78
					83.08			96			97.56
					86.65			99.15			98.77
					85.14			87.5			96.67
					87.45			86.71			97.67
					86.65			93.05			97.65
					87.45			99.57			98.8
					100			95.15			97.7
					96.81			99.15			94.19
					87.16			93.84			94.25
					93.86			93.84			91.58
					85.49			92.99			89.55
					87.16			92.98			97.03
					92.13			84.8			93.14
					85.41			96.12			95.88
					93.86			93.47			97.67
					83			95.45			97.96
					82.62			93.22			98.97
					82.62			97.61			93.33
					87.8			98.53			95.92
					88.68			96.6			96.91
					88.68			89.2			97.06
					80.79			88.81			88.99
					99.85			91.16			95.74
					88.49			97.87			97.35
					82.61			91.18			94.64
					81.61			98.58			97.14
					82.61			94.05			91.82
					84.99			93.06			95.74
					85.4			96.47			95.61
					88.49			96.09			95.92
					96.28			96.09			97.17
					90.83			96.09			92.08
					92.99			95.73			96.3
					89.97			95.37			94.55
					84.51			94.8			95.61
					96.28			87.72			97.75
					92.99			98.63			96.63
					92.05			98.73			96.67
					91.88			98.09			97.73
					80.4			98.24			97.65
					98.34			98.23			91.49
					90.89			91.49			88.8
					94			98.71			91.24
					83.92			86.59			92.68
					88.98			100			91.49
					97.56			100			100
					96.6			100			97.62
					89.81			100			97.71
					89.81			100			98.48
					96.6			100			92.68
					97.56			92.7			88.43
					88.26			94.79			98.77
					86.89			91.59			98.8
					81.14			93.13			100
					88.26			95.28			99.21
					85.16			94.97			98.41
					84.29			94.67			98.48
					85.8			94.65			97.14
					81.28			94.65			98.57
					85.8			93.85			100
					86.89			93.96			98.8
					80.34			92.59			98.82
					82.76			92.96			100
					85.16			87.99			90.84
					83.69			97.82			90.84
					82.76			89.72			95.73
					84.29			98.99			91.67
					81.14			97.99			91.67
					99.52			95.9			89.36
					97.7			94.26			93.33
					98.41			95.9			94.29
					97.7			96			94.17
					98.41			93.57			89.36
					98.19			99.3			95.45
					88.64			99.29			97.59
					87.07			99.29			97.7
					98.19			99.3			98.82
					88.24			96.72			97.59
					94			98.39			100
					84.66			98.07			100
					84.51			97.49			100
					89.97			89.55			100
					93.26			90.07			100
					93.26			90.07			100
					97.58			89.72			98.99
					96.5			89.01			96.91
					90.27			89.72			100
					88.98			97.47			100
					97.73			92.53			95.88
					97.73			91.59			94.85
					87.16			90.41			94.85
					87.16			91.24			95.51
					80.54			91.55			98.75
					92.81			91.36			95.56
					92.81			91.18			100
					90.86			91.16			97.67
					86.36			91.16			94.85
					86.36			94.8			100
					92.81			90.64			94.85
					91.6			97.7			97.67
					91.6			93.07			93.97
					80.6			98.57			92.38
					82.49			96.58			93.14
					91.68			97.59			96.04
								98.12			88.8
								99.25			87.69
								87.28			95.38
								89.01			87.41
								97.09			88.43
								92.25			96.91
								90.64			97.17
								90.34			97.17
								98.46			97.14
								98.82			95.73
								91.86			90.98
								99.29			97.59
								94.82			97.56
								99.2			97.53
								94.35			97.53
								87.34			95.56
								94.26			100
								90.64			96.67
								87.72			97.62
								84.66			97.59
								96.33			96.39
								90.84			97.56
								96.53
								91.54
								97.49
								87.69
								88.34
								87.99
								87.28
								88.34
								87.99
								90
								92.59
								93.33
								99.23
								100
								99.61
								99.41
								89.71
								99.61
								99.41
								98.43
								91.55
								99.61
								94.62
								95.28
								99.22
								99.74
								99.74
								99.22
								99.23
								99.61
								99.61
								99.61
								99.41
								99.02
								98.43
								91.18
								94.38
								94.67
								89.71
								100
								97.61
								97.46
								99.49
								87.5
								87.01
								87.5
								87.47
								87.47
								93.81
								94.24
								88.89
								90.5
								96.79
								95.19
								90.64
								93.6
								88.68
								84.66
								85.29
								88.5
								93.31
								88.34
								98.18
								90.07
								92.78
								88.78
								88.89
								86.59
								86.59
								86.59
								86.64
								84.48
								94.53
								98.82
								92.52
								87.82
								95.18
								100
								100
								95.22
								99.29
								95.55
								95.97
								94.88
								94.52
								95.96
								95.32
								95.97
								92.82
								99.15
								92.58
								99.15
								87.47
								84.89
								95.67
								99.57
								99.15
								93.42
								92.98
								87.01
								93.13
								99.69
								98.07
								100
								99.3
								95.24
								92.37
								100
								99.2
								95.16
								87.6
								95.9
								92.44
								89.87
								92.96
								87.99
								97.82
								89.72
								90.91
								99.01
								99.01
								93.76
								93.13
								98.04
								90.41
								98.43
								98.43
								98.04
								97.84
								98.04
								98.04
								88.89
								92.16
								92.79
								99.61
								99.61
								99.61
								99.41
								91.16
								99.61
								99.02
								98.04
								94.13
								94.65
								89.07
								100
								98.77
								98.63
								90.71
								94.24
								93.75
								92.78
								96.33
								88.84
								92.83
								96.79
								89.81
								83.72
								99.36
								86.23
								100
								95.96
								100
								99.58
								85.88
								99.58
								99.36
								100
								100
								95.97
								96.5
								99.41
								98.21
								96.09
								95.74
								97.01
								98.95
								98.21
								96.09
								95.74
								89.07
								89.75
								89.71
								89.71
								89.71
								88.89
								89.3
								89.41
								92.79
								93.07
								92.16
								92.5
								97.28
								98.11
								98.55
								98.18
								97.82
								97.82
								97.09
								93.53
								93.43
								87.74
								85.34
								99.15
								93.84
								93.42
								93.42
								98.72
								86.71
								92.84
								100
								98.57
								97.87
								96.63
								92.58
								92.16
								92.18
								92.99
								92.14
								86.84
								98.72
								86.14
								92.47
								83.72
								83.09
								83.48
								83.91
								92.82
								99.36
								85.56
								86.23
								85.48
								86.3
								94.52
								93.13
								92.84
								93.11
								92.81
								92.47
								93.05
								93.05
								92.15
								95.27
								97.28
								94.06
								99.74
								99.74
								89.38
								93.75
								94.21
								86.98
								93.11
								93.04
								87.5
								92.18
								100
								95.15
								93.42
								99.15
								92.98
								100
								85.11
								96.54
								92.87
								99.15
								100
								99.15
								93.42
								92.16
								92.98
								100
								99.11
								90.7
								91.21
								91.49
								91.75
								91.46
								84.48
								99.11
								91.86
								92.52
								93.95
								92.37
								92.37
								91.24
								96.72
								94.71
								93.61
								94.06
								91.18
								91.18
								92.61
								91.5
								90.73
								93.51
								93.85
								98.04
								99.41
								99.41
								99.41
								99.41
								98.82
								99.41
								89.75
								100
								91.46
								98.71
								98.46
								98.97
								86.59
								98.04
								89.3
								100
								99.61
								99.61
								99.61
								99.61
								91.16
								99.41
								99.02
								94.36
								94.97
								99.36
								93.02
								87.74
								88.45
								95.67
								92.98
								92.98
								86.84
								92.98
								92.98
								87.26
								92.15
								92.15
								98.1
								99.25
								97.37
								95.79
								97.59
								96.63
								85.48
								99.58
								98.94
								83.48
								99.58
								95.55
								99.58
								94.35
								86.44
								93.2
								93.96
								98.58
								97.86
								92.65
								91.5
								93.45
								96.58
								97.87
								97.87
								97.09
								92.61
								93.47
								93.06
								92.65
								92.87
								86.53
								92.81
								93.04
								98.73
								99.15
								93.84
								93.42
								92.99
								87.26
								84.91
								99.41
								99.02
								99.02
								99.02
								97.84
								98.82
								99.02
								89.41
								91.24
								94.38
								94.79
								90.7
								93.71
								88.81
								90.32
								90.71
								90.5
								97.37
								98.12
								95.79
								96.09
								95.37
								95.74
								95.74
								95.04
								97.99
								97.99
								87.46
								91.54
								90.64
								89.81
								94.96
								99.58
								95.97
								94.88
								86.3
								100
								99.36
								100
								83.91
								85.88
								97.09
								94.05
								94.05
								93.45
								88.45
								84.8
								85.11
								84.89
								85.11
								98.49
								98.24
								91.75
								98.97
								86.64
								87.46
								85.71
								88.68
								90.84
								88.84

## Sheet: Figure 6-figure supplement 1B
These data were used to generate Figure 6-figure supplement 1B. No breakpoints occurred at Retrotransposons.
Statistics found to the right of the data tables.
* p<0.05, **p<0.01, ***p<0.001, ****p<0.0001
	n= 3	n= 114		n= 33	n= 306		n= 11	n= 764		n= 6	n= 328			Figure 6-figure supplement 1B Intergenic Sequence Analysis				Figure 6-figure supplement 1B Intergenic Sequence Analysis
	Intergenic Breakpoint	Intergenic Non-Breakpoint		ORF Breakpoint	ORF Non-Breakpoint		LTR Breakpoint	LTR Non-Breakpoint		tRNA Breakpoint	tRNA Non-Breakpoint			Null Hypothesis: There is no significant difference between the distributions of copy length of long repeat sequences containing intergenic sequence found within 2 kb of a breakpoint and long repeat sequences containing intergenic sequence not found within 2 kb of a breakpoint.				Null Hypothesis: There is no significant difference in the distribution of long repeat sequence copy length between repeats found within 2 kb of a breakpoint for all genomic features.
	524	221		3215	1850		281	509		127	129
	316	125		2204	170		480	387		177	88			Intergenic Breakpoint				Kruskal-Wallis test
	314	95		4753	785		127	385		190	83			vs.				P value	< 0.0001
		93		4122	120		367	386		78	81			Intergenic Non-Breakpoint				Exact or approximate P value?	Approximate
		149		4113	120		478	387		103	114							P value summary	****
		298		1745	453		208	385		130	105			Kolmogorov-Smirnov test				Do the medians vary signif. (P < 0.05)	Yes
		319		1651	97		370	386			104			P value	0.0542			Number of groups	4
		212		1121	79		471	374			89			Exact or approximate P value?	Approximate			Kruskal-Wallis statistic	33.02
		206		1230	257		407	471			88			P value summary	ns
		379		785	1648		248	472			95			Significantly different? (P < 0.05)	No			Data summary
		211		1746	441		325	471			84			Kolmogorov-Smirnov D	0.7857			Number of treatments (columns)	4
		231		4114	295			470			90							Number of values (total)	53
		234		1764	1025			470			97			Figure 6-figure supplement 1B ORF Analysis
		233		185	1025			470			97			Null Hypothesis: There is no significant difference between the distributions of copy length of long repeat sequences containing ORFs found within 2 kb of a breakpoint and long repeat sequences containing ORFs not found within 2 kb of a breakpoint.
		281		869	343			471			84
		212		617	393			159			86			ORF Breakpoint
		247		6499	331			139			88			vs.
		72		196	429			246			83			ORF Non-Breakpoint
		146		1179	415			247			84
		349		3982	1658			247			75			Kolmogorov-Smirnov test
		351		1320	625			248			77			P value	< 0.0001
		210		1639	392			248			77			Exact or approximate P value?	Approximate
		385		1639	1161			247			78			P value summary	****
		393		666	194			311			115			Significantly different? (P < 0.05)	Yes
		235		1782	191			204			115			Kolmogorov-Smirnov D	0.4346
		212		2203	601			196			126
		123		661	601			197			126			Figure 6-figure supplement 1B LTR Analysis
		124		1378	599			371			128			Null Hypothesis: There is no significant difference between the distributions of copy length of long repeat sequences containing LTRs found within 2 kb of a breakpoint and long repeat sequences containing LTRs not found within 2 kb of a breakpoint.
		95		1378	386			371			110
		279		4755	386			371			105			LTR Breakpoint
		220		2861	651			371			105			vs.
		277		752	364			375			116			LTR Non-Breakpoint
		206		3783	161			376			117
		351			363			396			116			Kolmogorov-Smirnov test
		348			357			397			114			P value	0.8786
		256			201			389			85			Exact or approximate P value?	Approximate
		221			257			386			83			P value summary	ns
		524			1121			259			83			Significantly different? (P < 0.05)	No
		332			1029			393			129			Kolmogorov-Smirnov D	0.1788
		223			1399			393			126
		503			337			393			126			Figure 6-figure supplement 1B tRNA Analysis
		117			409			238			127			Null Hypothesis: There is no significant difference between the distributions of copy length of long repeat sequences containing tRNAs found within 2 kb of a breakpoint and long repeat sequences containing tRNAs not found within 2 kb of a breakpoint.
		118			809			235			140
		507			337			238			113			tRNA Breakpoint
		79			409			238			97			vs.
		79			809			235			87			tRNA Non-Breakpoint
		234			2860			235			85
		199			202			128			90			Kolmogorov-Smirnov test
		117			765			121			89			P value	0.0681
		201			290			281			176			Exact or approximate P value?	Approximate
		120			290			226			133			P value summary	ns
		222			1185			226			129			Significantly different? (P < 0.05)	No
		354			170			225			129			Kolmogorov-Smirnov D	0.5356
		355			863			213			128
		225			1334			282			131			* p<0.05, **p<0.01, ***p<0.001, ****p<0.0001
		693			863			280			140
		687			396			280			177
		228			1662			284			135
		230			408			280			133
		202			1571			418			87
		141			1571			409			82
		141			1110			409			76
		283			1113			417			78
		314			200			409			78
		314			200			416			177
		283			679			409			178
		258			353			409			177
		212			1491			408			103
		283			1526			397			229
		283			1526			166			186
		283			1462			281			77
		405			1491			281			101
		344			1462			281			82
		212			389			281			82
		221			186			278			82
		404			183			277			113
		173			100			278			112
		72			97			278			186
		230			79			263			98
		176			79			147			79
		314			77			250			81
		281			1403			248			81
		312			818			599			85
		90			316			318			76
		165			320			318			89
		199			378			318			113
		294			323			318			92
		165			893			319			86
		76			1233			318			133
		388			1179			321			101
		156			3987			318			101
		128			892			325			96
		373			1403			177			98
		93			908			177			92
		92			818			177			92
		153			908			177			78
		87			853			177			116
		124			427			199			101
		186			427			199			97
		189			1161			280			96
		74			667			282			73
		89			483			205			105
		71			862			244			101
		199			290			198			97
		294			1332			167			97
		71			1105			507			90
		248			1399			507			89
		90			229			278			89
		171			227			277			85
		173			227			278			84
		301			229			259			114
		231			723			257			110
					723			122			103
					842			236			100
					1136			249			101
					1150			249			101
					833			248			102
					161			249			120
					197			142			83
					211			510			87
					211			241			83
					641			77			82
					317			508			97
					3213			508			86
					1764			508			86
					1271			508			157
					1746			508			117
					393			508			117
					343			509			110
					903			407			107
					903			318			107
					392			217			102
					1288			208			73
					1934			141			102
					903			95			180
					1288			287			233
					1934			285			190
					903			193			77
					765			192			101
					97			192			105
					79			183			113
					1277			383			109
					1274			219			106
					1295			384			110
					537			263			106
					1782			263			117
					3030			262			116
					3034			264			109
					935			279			108
					415			279			108
					411			284			99
					185			285			88
					228			300			85
					349			337			85
					386			287			85
					386			281			90
					1746			280			97
					377			280			83
					295			285			83
					65			216			83
					94			280			78
					2573			277			82
					2577			275			115
					1526			276			113
					1526			231			161
					296			231			188
					301			231			75
					1298			231			179
					1830			231			101
					2761			231			120
					1385			232			89
					1385			208			83
					2042			163			82
					1830			202			107
					194			195			188
					194			195			106
					228			183			98
					411			471			77
					378			484			81
					271			331			121
					235			331			112
					112			470			84
					235			470			90
					112			470			82
					616			470			96
					344			470			97
					537			471			97
					1068			473			85
					1069			450			113
					1147			231			87
					1143			370			82
					1333			336			82
					1029			287			81
					305			287			80
					381			289			86
					602			207			81
					863			250			111
					949			251			81
					1492			251			121
					949			251			84
					1272			252			89
					1275			252			81
					1492			149			81
					1263			471			80
					617			471			88
					494			331			86
					1256			331			85
					491			470			83
					65			470			86
					94			470			86
					2421			470			86
					3805			470			91
					2454			470			130
					2453			470			100
					6474			454			101
					2389			232			96
					3811			397			86
					629			395			98
					1297			397			97
					1297			209			104
					336			204			98
					635			206			97
					644			287			101
					372			285			106
					679			246			94
					1292			281			112
					828			197			112
					1298			280			105
					827			166			105
					1850			243			94
					271			283			113
					1293			281			98
					3573			281			106
					661			281			96
					669			281			108
					786			281			108
					834			327			113
					3573			320			89
					669			585			89
					665			313			90
					616			313			87
					792			396			85
					602			396			134
					1182			387			121
					1439			389			132
					453			259			123
					235			79			141
					205			78			126
					294			77			126
					529			77			131
					538			77			132
					294			77			119
					205			393			117
					2681			326			80
					2664			333			82
					749			334			76
					2682			318			126
					511			318			126
					191			318			132
					2030			318			140
					483			318			140
					2030			325			83
					2661			265			83
					1105			135			85
					781			280			76
					511			277			130
					932			275			130
					776			276			117
					191			199			96
					741			199			94
					3984			121			91
					2733			121			102
					3708			121			104
					2732			150			102
					3708			140			91
					1705			142			88
					1133			141			83
					1145			141			87
					1713			142			85
					429			122			83
					1449			311			92
					372			311			93
					837			279			91
					786			264			92
					1878			278			91
					1869			278			91
					331			278			99
					428			278			97
					411			278			93
					234			277			91
					3262			278			94
					3246			331			97
					818			501			97
					815			493			86
					628			500			79
					139			500			89
					139			500			77
					345			500			85
					88			500			96
					85			325			103
					290			327			96
					117			217			85
					119			101			112
					861			210			102
					861			146			101
					498			83			99
								532			125
								531			125
								277			130
								276			130
								275			121
								280			97
								226			105
								228			104
								259			104
								255			115
								258			116
								141			82
								248			81
								251			81
								248			81
								236			89
								122			78
								342			90
								333			84
								336			83
								376			83
								250			82
								288
								259
								278
								263
								278
								278
								278
								278
								278
								276
								135
								480
								517
								79
								509
								509
								241
								508
								508
								508
								508
								509
								407
								318
								382
								381
								381
								383
								518
								511
								509
								509
								509
								509
								509
								509
								408
								319
								241
								77
								209
								197
								196
								461
								474
								461
								460
								460
								192
								191
								194
								176
								374
								374
								266
								297
								264
								327
								219
								217
								280
								277
								275
								276
								194
								194
								197
								261
								261
								261
								261
								277
								128
								255
								254
								237
								249
								249
								249
								248
								141
								471
								472
								370
								219
								470
								470
								472
								209
								471
								471
								472
								470
								450
								231
								470
								470
								470
								470
								331
								335
								325
								311
								257
								142
								249
								249
								249
								251
								248
								236
								122
								228
								228
								280
								277
								275
								276
								187
								507
								507
								416
								335
								510
								510
								509
								509
								509
								509
								510
								509
								241
								153
								208
								508
								508
								508
								508
								508
								509
								509
								508
								407
								318
								245
								78
								489
								586
								180
								190
								190
								190
								381
								251
								293
								372
								264
								471
								472
								472
								470
								470
								470
								472
								159
								470
								470
								470
								471
								472
								285
								337
								280
								280
								281
								301
								287
								280
								280
								281
								247
								244
								243
								243
								243
								243
								243
								236
								208
								98
								152
								276
								147
								264
								275
								275
								275
								275
								275
								478
								471
								472
								231
								470
								470
								470
								470
								470
								331
								335
								208
								210
								141
								89
								471
								471
								472
								470
								470
								470
								470
								332
								332
								428
								428
								421
								421
								209
								781
								427
								428
								443
								423
								219
								333
								333
								332
								332
								330
								329
								329
								329
								147
								147
								219
								381
								381
								217
								127
								121
								338
								334
								473
								471
								472
								470
								470
								470
								471
								470
								471
								450
								231
								476
								472
								470
								470
								470
								471
								470
								471
								1349
								379
								385
								386
								385
								395
								276
								1345
								257
								253
								248
								248
								248
								247
								122
								208
								218
								218
								204
								204
								203
								200
								517
								414
								325
								509
								508
								508
								508
								508
								508
								508
								242
								77
								396
								389
								389
								389
								259
								509
								241
								77
								508
								508
								508
								508
								508
								508
								509
								406
								318
								781
								473
								472
								459
								231
								470
								470
								470
								470
								470
								470
								331
								331
								313
								531
								532
								95
								83
								89
								488
								473
								472
								465
								471
								472
								472
								371
								160
								103
								265
								281
								280
								244
								194
								167
								144
								140
								140
								172
								198
								245
								245
								245
								475
								334
								334
								473
								471
								470
								470
								470
								470
								470
								231
								509
								509
								508
								508
								508
								508
								509
								235
								502
								407
								326
								386
								285
								285
								184
								183
								179
								532
								532
								285
								281
								281
								282
								282
								282
								199
								199
								335
								252
								252
								252
								330
								471
								472
								370
								467
								470
								470
								471
								464
								159
								172
								168
								168
								168
								449
								444
								440
								440
								440
								398
								397
								387
								390
								260
								301
								330
								242
								235
								230
