# Supplementary material for: Genome plasticity in Candida albicans is driven by long repeat sequences
Source: eLife journal article supplement (doi:10.7554/elife.45954), 2019-06-07
Supplement: supp [file elife-45954-supp-v1.zip › elife_poa_e45954_Supplementary_File_1.xlsx]

## Sheet: Todd_Supplementary File 1
Strain	Progenitor	Clade	Isolation Source	Ploidy	Reference	SRR
AMS3053	AMS3050		in vitro evolution	2N	Mount et al., 2018	SRR3593474
AMS3328	NA		Human Clinical	2N	This Study	SRR8324562
AMS3411	SC5314	1	Murine OPC	2N	This Study	SRR8324561
AMS3413	SC5314	1	Murine OPC	2N	This Study	SRR8324564
AMS3420	SC5314	1	Murine OPC	2N / 4N mixed	This Study	SRR8324563
AMS3432	SC5314	1	Murine OPC	2N	This Study	SRR8324558
AMS3742	P75016	SA	in vitro evolution	2N	This Study	SRR8324557
AMS3743	P78042	3	in vitro evolution	2N	This Study	SRR8324560
AMS3744	SC5314	1	in vitro evolution	2N	This Study	SRR8324559
AMS3747	P75063	SA	in vitro evolution	2N	This Study	SRR8324566
AMS3748	T490		in vitro evolution	2N	This Study	SRR8324565
FH5	NA		Invasive	2N	Abbey et al., 2014	SRR1634975
CEC4032	NA	1	Superficial	2N	Ropars et al., 2018	SRR6669952
CEC4493	NA	2	Food Spoilage	2N	Ropars et al., 2018	SRR6669906
CEC4488	NA	1	Food Spoilage	2N	Ropars et al., 2018	SRR6669913
CEC3708	NA	NC	Superficial	2N	Ropars et al., 2018	SRR6669946
CEC3662	NA	1	Invasive	2N	Ropars et al., 2018	SRR6669896
CEC3534	NA	1	Commensal	2N	Ropars et al., 2018	SRR6669968
CEC723	NA	NC	Superficial	2N	Ropars et al., 2018	SRR6669947
CEC3558	NA	2	Commensal	2N	Ropars et al., 2018	SRR6669992
CEC3603	NA	1	Commensal	2N	Ropars et al., 2018	SRR6669924
CEC3711	NA	10	Superficial	2N	Ropars et al., 2018	SRR6669949
CEC3607	NA	4	Commensal	2N	Ropars et al., 2018	SRR6669938
CEC3615	NA	2	Commensal	2N	Ropars et al., 2018	SRR6669941
CEC3617	NA	1	Commensal	2N	Ropars et al., 2018	SRR6669945
CEC2871	NA	18	Invasive	2N	Ropars et al., 2018	SRR6669855
P78042	NA	3	Invasive	2N	Hirakawa et al., 2015	SRR543724
SC5314	NA	1	Invasive	2N	Hirakawa et al., 2015	SRR868699
P75063	NA	SA	Invasive	2N	Hirakawa et al., 2015	SRR543727
F3120	NA		Clinical	2N	Ford et al., 2015	SRR1554302
F1649	NA		Clinical	2N	Ford et al., 2015	SRR1554287
F4639	NA		Clinical	2N	Ford et al., 2015	SRR1544691
F3733	NA		Clinical	2N	Ford et al., 2015	SRR1544616
AMS3743_1	AMS3743	3	30 passages in YPAD	2N + i(4R)	This Study	NA
AMS3743_2	AMS3743	3	30 passages in YPAD	2N + i(4R)	This Study	NA
AMS3743_3	AMS3743	3	30 passages in YPAD	2N + i(4R)	This Study	NA
AMS3743_4	AMS3743	3	30 passages in YPAD	2N + i(4R)	This Study	NA
AMS3743_5	AMS3743	3	30 passages in YPAD	2N + i(4R)	This Study	NA
AMS3743_6	AMS3743	3	30 passages in YPAD	2N + i(4R)	This Study	NA
AMS3743_7	AMS3743	3	30 passages in YPAD	2N + i(4R)	This Study	NA
AMS3743_8	AMS3743	3	30 passages in YPAD	2N + i(4R)	This Study	NA
AMS3743_9	AMS3743	3	30 passages in YPAD	2N + i(4R)	This Study	NA
AMS3743_10	AMS3743	3	30 passages in YPAD	2N + i(4R)	This Study	NA
AMS3743_11	AMS3743	3	30 passages in YPAD	2N + i(4R)	This Study	NA
AMS3743_12	AMS3743	3	30 passages in YPAD	2N + i(4R)	This Study	NA
AMS3743_10_S1	AMS3743_10	3	32 passages in YPAD	2N + i(4R)	This Study	NA
AMS3743_10_S2	AMS3743_10	3	32 passages in YPAD	2N + i(4R)	This Study	NA
AMS3743_10_S3	AMS3743_10	3	32 passages in YPAD	2N + i(4R)	This Study	NA
AMS3743_10_S4	AMS3743_10	3	32 passages in YPAD	2N + i(4R)	This Study	NA
AMS3743_10_S5	AMS3743_10	3	32 passages in YPAD	2N + i(4R)	This Study	NA
AMS3743_10_S6	AMS3743_10	3	32 passages in YPAD	2N	This Study	NA
