# Supplementary material for: Genome plasticity in Candida albicans is driven by long repeat sequences
Source: eLife journal article supplement (doi:10.7554/elife.45954), 2019-06-07
Supplement: supp [file elife-45954-supp-v1.zip › elife_poa_e45954_Supplementary_File_2.xlsx]

## Sheet: Todd_Supplementary File 2
INTRA or INTER	Repeat Family Number	General Feature Present	Repetive Gene (ALS/PGA/etc)	Copies per Genome	Chromosome Sequence 1	Start Sequence 1	End Sequence 1	Chromosome Sequence 2	Start Sequence 2	End Sequence 2	Copy Length Sequence 1	Copy Length Sequence 2	Spacer Length	Repeat Type	Shared Identity	Gene Features in Sequence 1	Gene Features in Sequence 2	ORF Occupancy Sequence 1	ORF Occupancy Sequence 2	Unnanotated Intergenic Sequence	LOH Breakpoint	CNV Breakpoint	Sequence Inversion	CGD Repeat
INTER	1	tRNA		4	1	42086	42173	2	1042606	1042518	88	89	NA	NA	95.51
INTRA	1	tRNA		4	1	42091	42173	1	1168972	1168890	83	83	1126717	Inverted	100	tRNA (AGU)	tRNA (AGU)
INTER	1	tRNA		4	1	42093	42173	R	172433	172512	81	80	NA	NA	98.77
INTER	2	LTR		4	1	42186	42572	2	1024192	1024588	387	397	NA	NA	93.22									Known
INTRA	2	LTR		4	1	42186	42570	1	537068	536676	385	393	494106	Inverted	92.41	Retrotransposon Tca8, Beta-1c LTR	Beta-1a LTR, Uncharacterized orf19.2943.5							Known
INTRA	2	LTR		4	1	42186	42571	1	45782	46167	386	386	3211	Tandem	99.74									Known
INTER	2	LTR		4	1	45781	46167	2	1024191	1024587	387	397	NA	NA	93.47									Known
INTRA	2	LTR		4	1	45782	46166	1	537068	536676	385	393	490510	Inverted	92.66	Retrotransposon Tca8, Beta-1c LTR	Beta-1a LTR, Uncharacterized orf19.2943.5							Known
INTRA	2	LTR		4	1	45782	46167	1	42186	42571	386	386	3981	Tandem	99.74									Known
INTER	3	ORF		2	1	60235	62084	7	630405	632254	1850	1850	NA	NA	84.99	orf19.6070	orf19.5170.1	Portion	Portion
INTER	4	tRNA		4	1	126508	126621	2	1888119	1888232	114	114	NA	NA	93.91
INTER	4	tRNA		4	1	126519	126623	R	1230198	1230095	105	104	NA	NA	94.29
INTRA	4	tRNA		4	1	126521	126624	1	1116103	1116207	104	105	989479	Tandem	95.24	tRNA (UGG)	tRNA (UGG)
INTER	5	tRNA		6	1	204986	205074	2	1621651	1621740	89	90	NA	NA	97.78
INTER	5	tRNA		6	1	204987	205074	5	1035136	1035224	88	89	NA	NA	96.63
INTRA	5	tRNA		6	1	204987	205081	1	3061199	3061103	95	97	2856022	Inverted	96.91	tRNA (AGC)	tRNA (AGC)
INTRA	5	tRNA		6	1	204991	205074	1	354222	354307	84	86	149148	Tandem	97.67	tRNA (AGC)	tRNA (AGC)
INTER	5	tRNA		6	1	204992	205081	3	845757	845846	90	90	NA	NA	94.44
INTRA	6	LTR		10	1	222180	222553	1	363877	363503	374	375	140950	Inverted	94.13	Eta-1a LTR	Intergenic Region			Unannotated LTR				Known
INTER	6	LTR		10	1	222183	222653	7	796246	796673	471	428	NA	NA	83.09					Unannotated LTR				Known
INTER	6	LTR		10	1	222183	222654	7	521437	521908	472	472	NA	NA	99.36									Known
INTER	6	LTR		10	1	222184	222654	7	927044	927470	471	427	NA	NA	85.56					Unannotated LTR				Known
INTER	6	LTR		10	1	222184	222653	7	528463	528932	470	470	NA	NA	99.36									Known
INTER	6	LTR		10	1	222184	222653	R	2182313	2182782	470	470	NA	NA	99.36									Known
INTER	6	LTR		10	1	222184	222653	5	360289	360758	470	470	NA	NA	95.32									Known
INTER	6	LTR		10	1	222184	222654	R	1924696	1924225	471	472	NA	NA	98.94									Known
INTRA	6	LTR		10	1	222244	222402	1	1657318	1657494	159	177	1434916	Tandem	85.31	Eta-1a LTR	Intergenic Region			Unannotated LTR (partial)				Known
INTER	7	LTR		8	1	248206	248344	3	296126	295987	139	140	NA	NA	93.57					Unannotated LTR (partial)				Known
INTER	7	LTR		8	1	248206	248451	2	969607	969358	246	250	NA	NA	92.8									Known
INTER	7	LTR		8	1	248206	248452	5	1171758	1172005	247	248	NA	NA	95.16									Known
INTER	7	LTR		8	1	248206	248452	4	207563	207810	247	248	NA	NA	94.35									Known
INTER	7	LTR		8	1	248206	248453	5	306860	306612	248	249	NA	NA	95.18									Known
INTER	7	LTR		8	1	248206	248453	R	544162	543915	248	248	NA	NA	93.95									Known
INTRA	7	LTR		8	1	248206	248452	1	2516663	2516416	247	248	2267964	Inverted	95.16	Iota-1b LTR	Iota-1a LTR							Known
INTRA	8	ORF		2	1	248556	248725	1	2769886	2770055	170	170	2521161	Tandem	92.35	Intergenic Region	Uncharacterized orf19.6353, Intergenic Region		Portion
INTER	9	LTR		3	1	277083	277407	5	535130	534806	325	325	NA	NA	99.69							CNV		Known
INTER	9	LTR		3	1	277091	277401	3	359632	359942	311	311	NA	NA	98.39	Vau-1a	Vau-3a							Known
INTER	10	LTR		6	1	280122	280325	2	1302279	1302076	204	204	NA	NA	98.53									Known
INTER	10	LTR		6	1	280126	280321	4	1193924	1194119	196	196	NA	NA	99.49									Known
INTER	10	LTR		6	1	280126	280322	2	216685	216879	197	195	NA	NA	97.97									Known
INTER	11	ORF		2	1	333322	334106	2	2189975	2190759	785	785	NA	NA	97.45	orf19.3354	orf19.5341	Portion	Single ORF
INTER	12	tRNA		7	1	336126	336222	4	1331730	1331634	97	97	NA	NA	98.97
INTER	12	tRNA		7	1	336128	336224	4	245691	245786	97	96	NA	NA	98.97
INTER	5	tRNA		6	1	354222	354305	2	1621656	1621740	84	85	NA	NA	98.82
INTRA	5	tRNA		6	1	354222	354307	1	204991	205074	86	84	149316	Tandem	97.67	tRNA (AGC)	tRNA (AGC)
INTRA	5	tRNA		6	1	354222	354309	1	3061195	3061109	88	87	2706800	Inverted	98.86	tRNA (AGC)	tRNA (AGC)
INTER	5	tRNA		6	1	354223	354305	3	845757	845841	83	85	NA	NA	96.47
INTER	5	tRNA		6	1	354223	354306	5	1035141	1035225	84	85	NA	NA	97.65
INTER	6	LTR		10	1	363503	363873	5	360658	360289	371	370	NA	NA	94.88					Unannotated LTR
INTER	6	LTR		10	1	363503	363873	7	521807	521438	371	370	NA	NA	94.88					Unannotated LTR (partial)
INTER	6	LTR		10	1	363503	363873	R	1924326	1924696	371	371	NA	NA	94.35					Unannotated LTR (partial)
INTER	6	LTR		10	1	363503	363873	R	2182682	2182313	371	370	NA	NA	94.88					Unannotated LTR (partial)
INTRA	6	LTR		10	1	363503	363877	1	222553	222180	375	374	141697	Inverted	94.13	Intergenic Region	Eta-1a LTR			Unannotated LTR (partial)
INTER	6	LTR		10	1	363503	363878	7	528832	528459	376	374	NA	NA	94.68
INTER	6	Intergenic		10	1	363655	363875	7	927262	927042	221	221	NA	NA	95.48
INTER	13	LTR		6	1	403870	404265	2	1887317	1886922	396	396	NA	NA	98.23									Known
INTER	13	LTR		6	1	403870	404266	R	2244076	2243679	397	398	NA	NA	98.49									Known
INTER	13	LTR		6	1	403873	404261	R	961852	961464	389	389	NA	NA	98.46									Known
INTER	13	LTR		6	1	403876	404261	R	426955	427339	386	385	NA	NA	91.21									Known
INTER	13	LTR		6	1	403880	404138	5	192734	192994	259	261	NA	NA	86.59					Unannotated LTR (partial)				Known
INTRA	14	ORF		2	1	406690	408328	1	436073	434435	1639	1639	26107	Inverted	91.46	Characterized orf19.4527 (HGT1)	Characterized orf19.3668 (HGT2)	Single ORF	Single ORF			CNV
INTRA	15	ORF		2	1	412040	412159	1	428557	428676	120	120	16398	Tandem	92.5	Characterized orf19.4526 (HSP30)	Characterized orf19.3664 (HSP31)	Portion	Portion
INTRA	15	ORF		2	1	428557	428676	1	412040	412159	120	120	16636	Tandem	92.5	Characterized orf19.3664 (HSP31)	Characterized orf19.4526 (HSP30)	Portion	Portion
INTRA	14	ORF		2	1	434435	436073	1	408328	406690	1639	1639	29383	Inverted	91.46	Characterized orf19.3668 (HGT2)	Characterized orf19.4527 (HGT1)	Single ORF	Single ORF			CNV
INTER	16	ORF		2	1	507777	508229	R	193851	194303	453	453	NA	NA	83.92	orf19.2929	orf19.3269	Portion	Portion
INTER	17	tRNA		5	1	536587	536661	3	1715834	1715760	75	75	NA	NA	100
INTER	17	tRNA		5	1	536587	536663	3	592111	592187	77	77	NA	NA	100
INTER	17	tRNA		5	1	536588	536664	2	810486	810410	77	77	NA	NA	100
INTER	17	tRNA		5	1	536588	536665	2	790336	790259	78	78	NA	NA	98.72
INTER	2	LTR		4	1	536676	537068	2	1024586	1024192	393	395	NA	NA	95.45									Known
INTRA	2	LTR		4	1	536676	537068	1	42570	42186	393	385	494882	Inverted	92.41	Beta-1a LTR, Uncharacterized orf19.2943.5	Retrotransposon Tca8, Beta-1c LTR							Known
INTRA	2	LTR		4	1	536676	537068	1	46166	45782	393	385	490902	Tandem	92.66	Beta-1a LTR, Uncharacterized orf19.2943.5	Retrotransposon Tca8, Beta-1c LTR							Known
INTER	18	Intergenic		3	1	641806	641930	3	1219811	1219688	125	124	NA	NA	94.4
INTER	18	ORF		3	1	641833	641929	2	338173	338272	97	100	NA	NA	95	Intergenic Region	orf19.1492		Portion	Unannotated ORF (partial)
INTER	18	Intergenic		3	1	641836	641930	3	1219836	1219742	95	95	NA	NA	100
INTER	18	ORF		3	1	641836	641914	2	338194	338272	79	79	NA	NA	100	Intergenic Region	orf19.1492		Portion	Unannotated ORF (partial)
INTER	18	Intergenic		3	1	641838	641930	3	1219837	1219745	93	93	NA	NA	100
INTRA	19	tRNA		3	1	719275	719389	1	1168235	1168350	115	116	448846	Tandem	86.67	tRNA (GUU)	tRNA (GUU)
INTRA	19	tRNA		3	1	719276	719390	1	1168044	1168160	115	117	448654	Tandem	84.87	tRNA (GUU)	tRNA (GUU)
INTRA	20	tRNA		5	1	748290	748416	1	1489663	1489789	127	127	741247	Tandem	97.64	tRNA (UAA)	tRNA (UAA)				LOH
INTER	20	tRNA		5	1	748290	748415	7	865896	866021	126	126	NA	NA	100
INTER	20	tRNA		5	1	748290	748415	R	339487	339612	126	126	NA	NA	99.21
INTER	20	tRNA		5	1	748290	748417	2	216920	217047	128	128	NA	NA	98.44
INTRA	21	ORF		2	1	751461	751717	1	1377104	1377360	257	257	625387	Tandem	92.61	Uncharacterized orf19.3061	Characterized orf19.6265 (RPS22A)	Portion	Portion
INTRA	22	ORF		2	1	774085	775732	1	855772	854122	1648	1651	78390	Inverted	97.64	Within Uncharacterized orf19.1037	Within Uncharacterized orf19.4482	Portion	Portion
INTER	23	ORF		3	1	824237	824677	R	1122588	1123016	441	429	NA	NA	88.24	orf19.4463	orf19.555	Portion	Portion
INTER	23	ORF		3	1	824293	824587	4	124507	124801	295	295	NA	NA	84.85	orf19.4463	orf19.4170	Portion	Portion
INTRA	24	ORF		2	1	842857	843881	1	868474	867450	1025	1025	23569	Inverted	82.59	Uncharacterized orf19.4476	Characterized orf19.1048 (IFD6)	Single ORF	Single ORF
INTRA	22	ORF		2	1	854122	855772	1	775732	774085	1651	1648	81687	Inverted	97.64	Within Uncharacterized orf19.4482	Within Uncharacterized orf19.1037	Portion	Portion		LOH
INTRA	24	ORF		2	1	867450	868474	1	843881	842857	1025	1025	25617	Inverted	82.59	Characterized orf19.1048 (IFD6)	Uncharacterized orf19.4476	Single ORF	Single ORF
INTER	25	ORF		2	1	870800	871142	3	819238	818896	343	343	NA	NA	90.96	orf19.1051	orf19.6924	Portion	Portion
INTER	26	ORF		2	1	872007	872399	3	818353	817961	393	393	NA	NA	89.31	orf19.1052	orf19.6925	Single ORF	Single ORF
INTER	27	ORF		2	1	881012	881342	R	1461034	1461364	331	331	NA	NA	97.58	orf19.1059	orf19.1854	Single ORF	Single ORF
INTER	28	ORF		3	1	882224	882652	R	1462296	1462723	429	428	NA	NA	96.5	orf19.1061	orf19.1853	Single ORF	Single ORF
INTER	28	ORF		3	1	882234	882648	3	1622364	1622778	415	415	NA	NA	89.64	orf19.1061	orf19.6791	Single ORF	Single ORF
INTRA	29	ORF		3	1	890738	892395	1	2957413	2955752	1658	1662	2063357	Inverted	89.78	Characterized orf19.1065 (SSA2)	Characterized orf 19.4980 (HSP70)	Portion	Portion
INTER	30	ORF		2	1	891690	892314	R	1763258	1762631	625	628	NA	NA	80.54	orf19.1065	orf19.6367	Portion	Portion
INTER	31	ORF		2	1	891691	892082	2	181633	181245	392	389	NA	NA	81.63	orf19.1065	orf19.6367	Portion	Portion
INTER	32	ORF		2	1	982685	983845	2	933244	932084	1161	1161	NA	NA	89.42	orf19.772	orf19.4506	Portion	Portion
INTER	33	LTR		10	1	1021320	1021557	4	537	764	238	228	NA	NA	90.34					Unannotated LTR				Known
INTER	33	LTR		10	1	1021320	1021554	3	1788669	1788444	235	226	NA	NA	90.64					Unannotated LTR (partial)				Known
INTER	33	LTR		10	1	1021320	1021557	4	1598433	1598215	238	219	NA	NA	85.29					Unannotated LTR (partial)				Known
INTER	33	LTR		10	1	1021320	1021557	5	1183373	1183146	238	228	NA	NA	92.44					Unannotated LTR (partial)				Known
INTER	33	LTR		10	1	1021320	1021554	5	1190698	1190925	235	228	NA	NA	89.87					Unannotated LTR (partial)				Known
INTER	33	LTR		10	1	1021320	1021554	6	5098	5323	235	226	NA	NA	90.64					Unannotated LTR (partial)				Known
INTER	33	LTR		10	1	1021320	1021447	7	949418	949544	128	127	NA	NA	93.75					Unannotated LTR (partial)				Known
INTER	33	LTR		10	1	1021320	1021440	R	4208	4328	121	121	NA	NA	94.21					Unannotated LTR (partial)				Known
INTER	33	LTR		10	1	1021320	1021600	6	1028465	1028744	281	280	NA	NA	97.15									Known
INTER	33	LTR		10	1	1021332	1021557	5	1483	1699	226	217	NA	NA	88.5					Unannotated LTR (partial)				Known
INTER	33	LTR		10	1	1021332	1021557	7	943823	943607	226	217	NA	NA	89.38					Unannotated LTR (partial)				Known
INTER	33	LTR		10	1	1021333	1021557	2	3814	4029	225	216	NA	NA	89.33					Unannotated LTR (partial)				Known
INTER	33	LTR		10	1	1021345	1021557	3	13334	13537	213	204	NA	NA	87.79					Unannotated LTR (partial)				Known
INTRA	34	ORF		2	1	1023403	1023596	1	1023535	1023725	194	191	61	Tandem	82.99	Uncharacterized orf19.750	Uncharacterized orf19.750	Portion	Portion
INTRA	34	ORF		2	1	1023535	1023725	1	1023403	1023596	191	194	322	Tandem	82.99	Uncharacterized orf19.750	Uncharacterized orf19.750	Portion	Portion
INTER	35	LTR		7	1	1054954	1055235	2	1442453	1442735	282	283	NA	NA	96.47									Known
INTER	35	LTR		7	1	1054955	1055234	7	554200	553921	280	280	NA	NA	98.21									Known
INTER	35	LTR		7	1	1054955	1055234	7	560341	560062	280	280	NA	NA	98.21									Known
INTER	35	LTR		7	1	1054955	1055238	R	2150623	2150339	284	285	NA	NA	95.79									Known
INTRA	35	LTR		7	1	1054955	1055234	1	3187590	3187869	280	280	2132356	Tandem	97.5	Gamma-1a LTR	Gamma-1b LTR							Known
INTER	4	tRNA		4	1	1116094	1116203	2	1888123	1888232	110	110	NA	NA	91.07
INTER	4	tRNA		4	1	1116103	1116207	R	1230196	1230095	105	102	NA	NA	93.33
INTRA	4	tRNA		4	1	1116103	1116207	1	126521	126624	105	104	989686	Tandem	95.24	tRNA (UGG)	tRNA (UGG)
INTRA	19	tRNA		3	1	1168044	1168159	1	1168236	1168349	116	114	77	Tandem	82.05	tRNA (GUU)	tRNA (GUU)
INTRA	19	tRNA		3	1	1168044	1168160	1	719276	719390	117	115	448884	Tandem	84.87	tRNA (GUU)	tRNA (GUU)
INTRA	19	tRNA		3	1	1168235	1168350	1	719275	719389	116	115	449075	Tandem	86.67	tRNA (GUU)	tRNA (GUU)
INTRA	19	tRNA		3	1	1168236	1168349	1	1168044	1168159	114	116	305	Tandem	82.05	tRNA (GUU)	tRNA (GUU)
INTER	1	tRNA		4	1	1168879	1168963	2	1042507	1042591	85	85	NA	NA	97.65
INTER	1	tRNA		4	1	1168888	1168970	R	172514	172433	83	82	NA	NA	98.8
INTRA	1	tRNA		4	1	1168890	1168972	1	42173	42091	83	83	1126881	Inverted	100	tRNA (AGU)	tRNA (AGU)
INTRA	36	ORF		2	1	1215459	1216059	1	1221588	1222188	601	601	5529	Tandem	84.41	Characterized orf19.2467 (PRN1)	Characterized orf19.2461 (PRN4)	Portion	Portion
INTRA	36	ORF		2	1	1221588	1222188	1	1215459	1216059	601	601	6729	Tandem	84.41	Characterized orf19.2461 (PRN4)	Characterized orf19.2467 (PRN1)	Portion	Portion
INTER	37	LTR		13	1	1291286	1291703	3	822665	822259	418	407	NA	NA	91.87					Unannotated LTR
INTER	37	LTR		13	1	1291288	1291696	4	637232	637638	409	407	NA	NA	94.62					Unannotated LTR (partial)
INTER	37	LTR		13	1	1291288	1291696	4	1179083	1178676	409	408	NA	NA	94.38					Unannotated LTR (partial)
INTER	37	LTR		13	1	1291288	1291704	6	325923	325508	417	416	NA	NA	93.76					Unannotated LTR (partial)
INTER	37	LTR		13	1	1291288	1291696	6	889072	888666	409	407	NA	NA	94.13					Unannotated LTR (partial)
INTER	37	LTR		13	1	1291288	1291703	R	626099	625686	416	414	NA	NA	93.51					Unannotated LTR (partial)
INTER	37	LTR		13	1	1291288	1291696	R	1971221	1971627	409	407	NA	NA	94.38					Unannotated LTR (partial)
INTRA	37	LTR		13	1	1291288	1291696	1	2590887	2591293	409	407	1299191	Tandem	94.38	Intergenic Region	Zeta-1a LTR			Unannotated LTR (partial)
INTER	37	LTR		13	1	1291289	1291696	R	1097942	1098347	408	406	NA	NA	94.36					Unannotated LTR (partial)
INTER	37	LTR		13	1	1291370	1291766	2	2168710	2169102	397	393	NA	NA	92.7					Unannotated LTR (partial)
INTER	38	Intergenic		3	1	1291703	1291851	2	863890	864035	149	146	NA	NA	92.62
INTER	38	LTR		3	1	1291703	1291868	2	177110	177272	166	163	NA	NA	87.35					Unannotated LTR (partial)
INTER	39	LTR		12	1	1292161	1292441	2	4606	4885	281	280	NA	NA	93.66						LOH			Known
INTER	39	LTR		12	1	1292161	1292441	5	2255	2534	281	280	NA	NA	93.31									Known
INTER	39	LTR		12	1	1292161	1292441	3	14093	14372	281	280	NA	NA	92.96									Known
INTER	39	LTR		12	1	1292161	1292441	6	5903	6182	281	280	NA	NA	92.96									Known
INTER	39	LTR		12	1	1292161	1292441	3	1787885	1787606	281	280	NA	NA	92.25									Known
INTER	39	LTR		12	1	1292164	1292441	3	521813	521536	278	278	NA	NA	92.53									Known
INTER	39	LTR		12	1	1292165	1292441	4	393998	393723	277	276	NA	NA	90					Unannotated LTR				Known
INTRA	39	LTR		12	1	1292165	1292442	1	1936015	1935738	278	278	643296	Inverted	90.04	Rho-1b LTR	Intergenic Region			Unannotated LTR				Known
INTER	39	LTR		12	1	1292165	1292442	7	608495	608220	278	276	NA	NA	92.5									Known
INTRA	39	LTR		12	1	1292179	1292441	1	3187232	3186971	263	262	1894530	Inverted	93.23	Rho-1b LTR	Rho-1a LTR							Known
INTER	39	LTR		12	1	1292295	1292441	7	942511	942365	147	147	NA	NA	95.27					Unannotated LTR (partial)				Known
INTRA	40	LTR		4	1	1292446	1292695	1	2910815	2911062	250	248	1618120	Tandem	89.64	Intergenic Region	Tara-1a LTR			Unannotated LTR (partial)
INTER	40	LTR		4	1	1292448	1292695	2	1333659	1333414	248	246	NA	NA	91.16					Unannotated LTR (partial)
INTER	41	ORF		3	1	1293048	1293646	R	2286389	2285837	599	553	NA	NA	88			Portion	Portion
INTER	41	LTR		3	1	1293048	1293646	R	2286389	2285837	599	553	NA	NA	83.71					Unannotated LTR
INTER	42	ORF		9	1	1293554	1293939	6	6182	6562	386	381	NA	NA	95.6			Single ORF	Portion
INTER	42	ORF		9	1	1293554	1293939	5	2534	2911	386	378	NA	NA	92.76			Single ORF		Unannotated TLO (partial)
INTER	42	ORF		9	1	1293569	1294219	7	942353	941689	651	665	NA	NA	92.05			Single ORF	Single ORF
INTER	42	ORF		9	1	1293576	1293939	4	1597625	1597264	364	362	NA	NA	96.15			Single ORF	Portion
INTER	42	ORF		9	1	1293577	1293737	3	14389	14549	161	161	NA	NA	91.46			Single ORF		Unannotated TLO (partial)
INTER	42	ORF		9	1	1293577	1293939	3	1787589	1787241	363	349	NA	NA	92.56			Single ORF		Unannotated TLO (partial)
INTER	42	ORF		9	1	1293583	1293939	2	4908	5260	357	353	NA	NA	95.24			Single ORF		Unannotated TLO (partial)
INTER	42	ORF		9	1	1293739	1293939	3	14755	14951	201	197	NA	NA	95.52			Single ORF		Unannotated TLO (partial)
INTER	43	Intergenic		14	1	1293899	1294196	R	2243531	2243231	298	301	NA	NA	84.24
INTER	43	Intergenic		14	1	1293899	1294217	4	1260869	1260538	319	332	NA	NA	85.59
INTER	43	LTR		14	1	1293899	1294216	2	655275	654945	318	331	NA	NA	86.71					Unannotated LTR (partial)
INTER	43	LTR		14	1	1293899	1294216	2	1012747	1012417	318	331	NA	NA	86.71					Unannotated LTR (partial)
INTER	43	LTR		14	1	1293899	1294216	5	500849	501179	318	331	NA	NA	87.01					Unannotated LTR (partial)
INTER	43	LTR		14	1	1293899	1294216	7	674596	674926	318	331	NA	NA	86.71					Unannotated LTR (partial)
INTER	43	LTR		14	1	1293899	1294217	7	779286	779617	319	332	NA	NA	86.14					Unannotated LTR (partial)
INTER	43	LTR		14	1	1293899	1294216	R	1474421	1474751	318	331	NA	NA	92.15					Unannotated LTR (partial)
INTER	43	LTR		14	1	1293899	1294219	R	1968653	1968320	321	334	NA	NA	86.53					Unannotated LTR (partial)
INTER	43	LTR		14	1	1293899	1294216	R	215592	215262	318	331	NA	NA	86.71
INTER	43	LTR		14	1	1293899	1294223	R	210916	210579	325	338	NA	NA	86.98
INTER	44	Intergenic		2	1	1335138	1335349	7	912996	912785	212	212	NA	NA	94.34
INTRA	21	ORF		2	1	1377104	1377360	1	751461	751717	257	257	625899	Tandem	92.61	Characterized orf19.6265 (RPS22A)	Uncharacterized orf19.3061	Portion	Portion
INTER	20	tRNA		5	1	1489661	1489789	2	216918	217046	129	129	NA	NA	97.67
INTER	20	tRNA		5	1	1489663	1489788	R	339487	339612	126	126	NA	NA	98.41
INTER	20	tRNA		5	1	1489663	1489788	7	865896	866021	126	126	NA	NA	97.62
INTRA	20	tRNA		5	1	1489663	1489789	1	748290	748416	127	127	741499	Tandem	97.64	tRNA (UAA)	tRNA (UAA)
INTER	45	Intergenic		2	1	1523859	1524064	4	550228	550023	206	206	NA	NA	89.86					Unannotated ORF (partial)
INTER	46	tRNA		2	1	1570041	1570180	R	456689	456550	140	140	NA	NA	98.57
INTRA	47	ORF		2	1	1614532	1615652	1	1631749	1630629	1121	1121	14977	Mirrored	99.02	Contains part of snR42 (small nucleolar RNA)	Contains part of Uncharacterized orf19.2800	Portion	Single ORF
INTRA	47	ORF		2	1	1630629	1631749	1	1615652	1614532	1121	1121	17217	Mirrored	99.02	Contains part of Uncharacterized orf19.2800	Contains part of snR42 (small nucleolar RNA)	Single ORF	Portion		LOH
INTER	6	LTR		10	1	1657318	1657494	7	521498	521656	177	159	NA	NA	85.88					Unannotated LTR (partial)
INTER	6	LTR		10	1	1657318	1657494	R	1924636	1924477	177	160	NA	NA	86.44					Unannotated LTR (partial)
INTER	6	LTR		10	1	1657318	1657494	R	2182373	2182531	177	159	NA	NA	85.88					Unannotated LTR (partial)
INTRA	6	LTR		10	1	1657318	1657494	1	222244	222402	177	159	1435250	Tandem	85.31	Intergenic Region	Eta-1a LTR			Unannotated LTR (partial)
INTER	6	LTR		10	1	1657318	1657494	7	528523	528681	177	159	NA	NA	85.88
INTER	6	Intergenic		10	1	1657336	1657714	7	796324	796667	379	344	NA	NA	83.64
INTER	48	Retrotransposon		2	1	1658648	1659460	7	527907	527105	813	803	NA	NA	92.5
INTER	49	LTR		3	1	1808031	1808229	3	14751	14553	199	199	NA	NA	98.99									Known
INTER	49	LTR		3	1	1808031	1808229	R	2154454	2154256	199	199	NA	NA	97.99									Known
INTER	50	LTR		7	1	1815250	1815529	R	1947303	1947582	280	280	NA	NA	97.86									Known
INTER	50	LTR		7	1	1815250	1815531	2	1417186	1416906	282	281	NA	NA	97.87									Known
INTER	50	LTR		7	1	1815252	1815456	R	1938960	1939172	205	213	NA	NA	83.41					Unannotated LTR				Known
INTER	50	LTR		7	1	1815283	1815526	R	1968322	1968078	244	245	NA	NA	93.47									Known
INTER	50	LTR		7	1	1815333	1815530	R	611816	611613	198	204	NA	NA	91.18					Unannotated LTR (partial)				Known
INTER	50	LTR		7	1	1815360	1815526	R	2203300	2203133	167	168	NA	NA	94.05					Unannotated LTR (partial)				Known
INTER	51	ORF		2	1	1829299	1830327	5	1108978	1107950	1029	1029	NA	NA	84.94	orf19.5113	orf19.3997	Single ORF	Single ORF
INTER	52	ORF		2	1	1842596	1843994	2	1691945	1690547	1399	1399	NA	NA	99.57	orf19.382	orf19.1435	Single ORF	Single ORF
INTER	53	LTR		3	1	1902461	1902967	6	240871	240365	507	507	NA	NA	99.01									Known
INTER	53	LTR		3	1	1902461	1902967	6	245424	244918	507	507	NA	NA	99.01									Known
INTRA	39	LTR		12	1	1935738	1936015	1	1292442	1292165	278	278	643850	Inverted	90.04	Intergenic Region	Rho-1b LTR			Unannotated LTR
INTER	39	LTR		12	1	1935739	1936015	3	521536	521812	277	277	NA	NA	97.47					Unannotated LTR
INTER	39	LTR		12	1	1935739	1936016	4	393723	393999	278	277	NA	NA	97.84					Unannotated LTR
INTER	54	Intergenic		3	1	2025019	2025229	2	1755709	1755500	211	210	NA	NA	97.63
INTRA	55	ORF		2	1	2109915	2110251	1	2166504	2166168	337	337	55917	Inverted	83.14	Characterized orf19.4821 (LIP1)	Characterized orf19.4856 (LIP3)	Portion	Portion
INTRA	56	ORF		2	1	2114933	2115341	1	2166827	2166419	409	409	51078	Inverted	81.51	Characterized orf19.4823 (LIP6)	Characterized orf19.4856 (LIP3)	Portion	Portion
INTRA	57	ORF		2	1	2117999	2118807	1	2168519	2167711	809	809	48904	Inverted	88.4	Uncharacterized orf19.4824	Uncharacterized orf19.4857	Single ORF	Single ORF
INTRA	55	ORF		2	1	2166168	2166504	1	2110251	2109915	337	337	56589	Inverted	83.14	acterized orf19.4856 (LIP3)	Characterized orf19.4821 (LIP1)	Portion	Portion
INTRA	56	ORF		2	1	2166419	2166827	1	2115341	2114933	409	409	51894	Inverted	81.51	Characterized orf19.4856 (LIP3)	Characterized orf19.4823 (LIP6)	Portion	Portion
INTRA	57	ORF		2	1	2167711	2168519	1	2118807	2117999	809	809	50520	Inverted	88.4	Uncharacterized orf19.4857	Uncharacterized orf19.4824	Single ORF	Single ORF
INTRA	58	ORF		2	1	2271519	2274379	1	2335801	2332942	2861	2860	58563	Inverted	96.47	Characterized orf19.4899 (GCA1)	Characterized orf19.1999 (GCA2)	Single ORF	Single ORF				INVERSION
INTRA	58	ORF		2	1	2332942	2335801	1	2274379	2271519	2860	2861	64282	Inverted	96.47	Characterized orf19.1999 (GCA2)	Characterized orf19.4899 (GCA1)	Single ORF	Single ORF
INTER	59	ORF		2	1	2340393	2340594	R	30694	30889	202	196	NA	NA	91.13	orf19.1005	orf19.7523	Portion	Portion
INTER	60	ORF		2	1	2432804	2433568	3	1154027	1153263	765	765	NA	NA	90.36	orf19.2311	orf19.6002	Single ORF	Single ORF
INTRA	61	ORF		2	1	2459811	2460100	1	2460402	2460691	290	290	302	Tandem	92.41	Uncharacterized orf19.2296	Uncharacterized orf19.2296	Portion	Portion
INTRA	61	ORF		2	1	2460402	2460691	1	2459811	2460100	290	290	880	Tandem	92.41	Uncharacterized orf19.2296	Uncharacterized orf19.2296	Portion	Portion
INTER	7	LTR		8	1	2516410	2516668	4	207816	207558	259	259	NA	NA	98.46									Known
INTER	7	LTR		8	1	2516411	2516667	5	1172010	1171754	257	257	NA	NA	100									Known
INTER	7	LTR		8	1	2516415	2516536	3	295746	295866	122	121	NA	NA	95.9					Unannotated LTR				Known
INTER	7	LTR		8	1	2516416	2516651	6	86745	86515	236	231	NA	NA	87.6					Unannotated LTR (partial)				Known
INTER	7	LTR		8	1	2516416	2516664	5	306613	306861	249	249	NA	NA	100									Known
INTER	7	LTR		8	1	2516416	2516664	R	543916	544163	249	248	NA	NA	92.37									Known
INTRA	7	LTR		8	1	2516416	2516663	1	248452	248206	248	247	2268457	Inverted	95.16	Iota-1a LTR	Iota-1b LTR							Known
INTER	7	LTR		8	1	2516417	2516665	2	969358	969609	249	252	NA	NA	95.24									Known
INTER	7	LTR		8	1	2516524	2516665	3	295987	296128	142	142	NA	NA	99.3					Unannotated LTR (partial)				Known
INTER	62	ORF		2	1	2572630	2573814	R	69026	67845	1185	1182	NA	NA	90.89	orf19.1143	orf19.7506	Single ORF	Single ORF
INTER	37	LTR		13	1	2590791	2591300	4	1179179	1178669	510	511	NA	NA	99.61									Known
INTER	37	LTR		13	1	2590792	2591032	7	591367	591609	241	243	NA	NA	89.71					Unannotated LTR (partial)				Known
INTER	37	LTR		13	1	2590792	2590868	2	2168640	2168716	77	77	NA	NA	100									Known
INTER	37	LTR		13	1	2590792	2591299	6	889167	888660	508	508	NA	NA	99.61									Known
INTER	37	LTR		13	1	2590792	2591299	R	1097846	1098353	508	508	NA	NA	99.61									Known
INTER	37	LTR		13	1	2590792	2591299	R	626194	625687	508	508	NA	NA	99.41									Known
INTER	37	LTR		13	1	2590792	2591299	R	1971126	1971633	508	508	NA	NA	99.02									Known
INTER	37	LTR		13	1	2590792	2591299	6	326018	325510	508	509	NA	NA	98.04									Known
INTER	37	LTR		13	1	2590792	2591299	3	822759	822260	508	500	NA	NA	91.36									Known
INTER	37	LTR		13	1	2590792	2591300	4	637137	637645	509	509	NA	NA	99.61									Known
INTRA	37	LTR		13	1	2590887	2591293	1	1291288	1291696	407	409	1300005	Tandem	94.38	Zeta-1a LTR	Intergenic Region			Unannotated LTR (partial)				Known
INTER	37	LTR		13	1	2590976	2591293	2	2168718	2169035	318	318	NA	NA	94.65									Known
INTER	63	tRNA		2	1	2727630	2727742	3	1560949	1561061	113	113	NA	NA	98.25
INTRA	8	ORF		2	1	2769886	2770055	1	248556	248725	170	170	2521499	Tandem	92.35	Uncharacterized orf19.6353, Intergenic Region	Intergenic Region	Portion		Unannotated ORF (partial)
INTRA	64	ORF		2	1	2801189	2802051	1	2809918	2809056	863	863	7005	Inverted	84.51	Uncharacterized orf19.4916	Uncharacterized orf19.4921	Portion	Portion
INTRA	65	ORF		2	1	2802155	2803488	1	2808952	2807633	1334	1320	4145	Inverted	93.78	Uncharacterized orf19.4916, Uncharacterized orf19.4917	Uncharacterized orf19.4921	Multi ORF	Portion
INTRA	65	ORF		2	1	2807633	2808952	1	2803488	2802155	1320	1334	6797	Inverted	93.78	Uncharacterized orf19.4921	Uncharacterized orf19.4916, Uncharacterized orf19.4917	Portion	Multi ORF			CNV	INVERSION
INTRA	64	ORF		2	1	2809056	2809918	1	2802051	2801189	863	863	8729	Inverted	84.51	Uncharacterized orf19.4921	Uncharacterized orf19.4916	Portion	Portion
INTER	66	ORF		2	1	2883130	2883525	3	865900	866291	396	392	NA	NA	98.48	orf19.4949	snR17A	Portion	Single ORF
INTER	67	LTR		6	1	2887192	2887408	3	1273023	1273239	217	217	NA	NA	97.7									Known
INTER	67	LTR		6	1	2887194	2887401	7	756020	756227	208	208	NA	NA	100									Known
INTER	67	LTR		6	1	2887261	2887401	R	1968080	1967941	141	140	NA	NA	97.87					Unannotated LTR (partial)				Known
INTER	67	LTR		6	1	2887313	2887407	R	1883944	1883850	95	95	NA	NA	95.79					Unannotated LTR (partial)				Known
INTER	40	LTR		4	1	2910784	2911070	2	1333692	1333406	287	287	NA	NA	89.2									Known
INTER	40	LTR		4	1	2910785	2911069	R	2035222	2035506	285	285	NA	NA	93.71									Known
INTRA	40	LTR		4	1	2910815	2911062	1	1292446	1292695	248	250	1618616	Tandem	89.64	Tara-1a LTR	Intergenic Region			Unannotated LTR		CNV		Known
INTRA	29	ORF		3	1	2955752	2957413	1	892395	890738	1662	1658	2066675	Inverted	89.78	Characterized orf19.4980 (HSP70)	Characterized orf19.1065 (SSA2)	Portion	Portion
INTER	31	ORF		2	1	2956053	2956460	2	181232	181633	408	402	NA	NA	80.68	orf19.4980	orf19.6367	Portion	Portion
INTRA	68	ORF		2	1	3032014	3033584	1	3081487	3083057	1571	1571	47903	Tandem	80.47	Uncharacterized orf19.5017	Characterized orf19.7205 (DUR7)	Portion	Portion
INTRA	5	tRNA		6	1	3061103	3061199	1	205081	204987	97	95	2856212	Inverted	96.91	tRNA (AGC)	tRNA (AGC)
INTRA	5	tRNA		6	1	3061109	3061195	1	354309	354222	87	88	2706973	Inverted	98.86	tRNA (AGC)	tRNA (AGC)
INTER	5	tRNA		6	1	3061110	3061194	3	845841	845757	85	85	NA	NA	96.47
INTER	5	tRNA		6	1	3061110	3061199	5	1035225	1035136	90	90	NA	NA	96.67
INTER	5	tRNA		6	1	3061111	3061199	2	1621740	1621652	89	89	NA	NA	98.88
INTRA	68	ORF		2	1	3081487	3083057	1	3032014	3033584	1571	1571	51043	Tandem	80.47	Characterized orf19.7205 (DUR7)	Uncharacterized orf19.5017	Portion	Portion
INTER	69	LTR		5	1	3099034	3099226	4	1262686	1262877	193	192	NA	NA	93.81									Known
INTER	69	LTR		5	1	3099035	3099226	6	1032627	1032438	192	190	NA	NA	93.75									Known
INTER	69	LTR		5	1	3099035	3099226	5	167376	167569	192	194	NA	NA	88.78									Known
INTER	69	LTR		5	1	3099044	3099226	R	2036689	2036872	183	184	NA	NA	90.32					Unannotated LTR				Known
INTRA	70	ORF		2	1	3113842	3114951	1	3134233	3133121	1110	1113	18170	Inverted	84.04	Characterized orf19.7219 (FTR1)	Characterized orf19.7231 (FTR2)	Single ORF	Single ORF
INTRA	70	ORF		2	1	3133121	3134233	1	3114951	3113842	1113	1110	20391	Inverted	84.04	Characterized orf19.7231 (FTR2)	Characterized orf19.7219 (FTR1)	Single ORF	Single ORF
INTRA	71	ORF		2	1	3149347	3149546	1	3149551	3149750	200	200	5	Tandem	98	Characterized orf19.7239 (MDG1)	Characterized orf19.7239 (MDG1)	Portion	Portion
INTRA	71	ORF		2	1	3149551	3149750	1	3149347	3149546	200	200	403	Tandem	98	Characterized orf19.7239 (MDG1)	Characterized orf19.7239 (MDG1)	Portion	Portion
INTER	72	LTR		5	1	3178400	3178782	4	673951	674332	383	382	NA	NA	99.22									Known
INTER	72	LTR		5	1	3178401	3178619	R	544587	544370	219	218	NA	NA	93.61					Unannotated LTR				Known
INTER	72	LTR		5	1	3178401	3178784	4	680467	680849	384	383	NA	NA	99.22									Known
INTER	39	LTR		12	1	3186970	3187232	4	393722	393984	263	263	NA	NA	87.69					Unannotated LTR				Known
INTER	39	LTR		12	1	3186970	3187232	3	521535	521798	263	264	NA	NA	89.55									Known
INTRA	39	LTR		12	1	3186971	3187232	1	1292441	1292179	262	263	1895053	Inverted	93.23	Rho-1a LTR	Rho-1b LTR							Known
INTER	39	LTR		12	1	3186971	3187234	7	608221	608484	264	264	NA	NA	98.11									Known
INTER	35	LTR		7	1	3187235	3187513	2	1442454	1442734	279	281	NA	NA	95.73									Known
INTER	35	LTR		7	1	3187235	3187513	R	2150623	2150343	279	281	NA	NA	95.37									Known
INTRA	35	LTR		7	1	3187235	3187518	1	3187590	3187874	284	285	72	Tandem	95.79	Gamma-1c LTR	Gamma-1b LTR							Known
INTER	35	LTR		7	1	3187235	3187519	7	554200	553916	285	285	NA	NA	96.5									Known
INTER	35	LTR		7	1	3187235	3187534	7	560341	560041	300	301	NA	NA	97.01									Known
INTER	35	LTR		7	1	3187536	3187872	7	554254	553918	337	337	NA	NA	99.41									Known
INTER	35	LTR		7	1	3187588	3187874	7	560343	560057	287	287	NA	NA	98.95									Known
INTER	35	LTR		7	1	3187589	3187869	R	2150624	2150343	281	282	NA	NA	95.04									Known
INTER	35	LTR		7	1	3187590	3187869	2	1442454	1442734	280	281	NA	NA	95.37									Known
INTRA	35	LTR		7	1	3187590	3187869	1	1054955	1055234	280	280	2132914	Tandem	97.5	Gamma-1b LTR	Gamma-1a LTR							Known
INTRA	35	LTR		7	1	3187590	3187874	1	3187235	3187518	285	284	639	Tandem	95.79	Gamma-1b LTR	Gamma-1c LTR							Known
INTER	73	ORF		5	1	3187870	3188548	7	555906	556584	679	679	NA	NA	99.85	orf19.7239	Tca2-7	Single ORF	Portion
INTER	33	LTR		10	2	3814	4029	1	1021333	1021557	216	225	NA	NA	89.33					Unannotated LTR (partial)
INTER	39	LTR		12	2	4606	4885	1	1292161	1292441	280	281	NA	NA	93.66									Known
INTER	39	LTR		12	2	4610	4886	4	393999	393722	277	278	NA	NA	88.34					Unannotated LTR/TLO (partial)				Known
INTER	39	LTR		12	2	4611	4885	7	608495	608221	275	275	NA	NA	98.55									Known
INTER	39	LTR		12	2	4611	4886	3	521812	521535	276	278	NA	NA	90.07									Known
INTER	42	ORF		9	2	4908	5260	1	1293583	1293939	353	357	NA	NA	95.24				Single ORF	Unannotated TLO (partial)
INTER	43	Intergenic		14	2	148011	148241	R	2243440	2243670	231	231	NA	NA	90.48
INTER	43	Intergenic		14	2	148011	148244	4	1260779	1261001	234	223	NA	NA	88.89
INTER	43	LTR		14	2	148011	148241	5	500940	500710	231	231	NA	NA	95.67					Unannotated LTR (partial)
INTER	43	LTR		14	2	148011	148241	7	674687	674457	231	231	NA	NA	85.34					Unannotated LTR (partial)
INTER	43	LTR		14	2	148011	148241	R	210825	211055	231	231	NA	NA	96.54					Unannotated LTR (partial)
INTER	43	LTR		14	2	148011	148241	R	1474512	1474282	231	231	NA	NA	95.67					Unannotated LTR (partial)
INTER	43	LTR		14	2	148011	148241	R	1968562	1968792	231	231	NA	NA	84.91					Unannotated LTR (partial)
INTRA	43	LTR		14	2	148011	148241	2	655184	655414	231	231	506943	Tandem	96.54	Intergenic Region	Psi-2b LTR			Unannotated LTR (partial)
INTRA	43	LTR		14	2	148011	148242	2	1012656	1012887	232	232	864414	Tandem	96.12	Intergenic Region	Psi-2a LTR			Unannotated LTR (partial)
INTER	43	Retrotransposon		14	2	148011	148241	R	215501	215731	231	231	NA	NA	96.54					Unannotated ORF/Retrotransposon (partial)
INTRA	73	ORF		5	2	164564	166054	2	170326	171816	1491	1491	4272	Tandem	89.2	Characterized orf19.2023 (HGT7)	Characterized orf19.2020 (HGT6)	Single ORF	Single ORF
INTRA	74	ORF		2	2	164589	166114	2	167425	168950	1526	1526	1311	Tandem	88.34	Characterized orf19.2023 (HGT7)	Characterized orf19.2021 (HGT8)	Single ORF	Single ORF
INTRA	74	ORF		2	2	167425	168950	2	164589	166114	1526	1526	4361	Tandem	88.34	Characterized orf19.2021 (HGT8)	Characterized orf19.2023 (HGT7)	Single ORF	Single ORF
INTRA	73	ORF		5	2	167429	168890	2	170355	171816	1462	1462	1465	Tandem	90.22	Characterized orf19.2021 (HGT8)	Characterized orf19.2020 (HGT6)	Single ORF	Single ORF
INTRA	73	ORF		5	2	170326	171816	2	164564	166054	1491	1491	7252	Tandem	89.2	Characterized orf19.2020 (HGT6)	Characterized orf19.2023 (HGT7)	Single ORF	Single ORF
INTRA	73	ORF		5	2	170355	171816	2	167429	168890	1462	1462	4387	Tandem	90.22	Characterized orf19.2020 (HGT6)	Characterized orf19.2021 (HGT8)	Single ORF	Single ORF
INTRA	75	tRNA		8	2	175906	176081	2	323382	323558	176	177	147301	Tandem	89.89	tRNA (CAA)	tRNA (CAA)
INTER	75	tRNA		8	2	175912	176044	6	993060	992932	133	129	NA	NA	91.79
INTER	75	tRNA		8	2	175914	176042	R	1841903	1842027	129	125	NA	NA	87.69
INTRA	38	LTR		3	2	177070	177277	2	863851	864057	208	207	686574	Tandem	92.79	Toroa-2a LTR	Intergenic Region			Unannotated LTR (partial)				Known
INTER	38	LTR		3	2	177110	177272	1	1291703	1291868	163	166	NA	NA	87.35					Unannotated LTR (partial)				Known
INTER	76	Intergenic		5	2	177824	178056	4	762168	761948	233	221	NA	NA	85.41
INTER	29	ORF		3	2	181245	181633	1	892082	891691	389	392	NA	NA	81.63	orf19.2013	orf19.4980	Portion	Portion
INTRA	10	LTR		6	2	216677	216878	2	1302285	1302080	202	206	1085202	Inverted	96.6	Phi-2a LTR	Phi-2b LTR							Known
INTER	10	LTR		6	2	216684	216878	4	1193923	1194119	195	197	NA	NA	97.46									Known
INTER	10	LTR		6	2	216685	216879	1	280126	280322	195	197	NA	NA	97.97									Known
INTER	10	LTR		6	2	216698	216880	6	211295	211109	183	187	NA	NA	90.91					Unannotated LTR				Known
INTER	20	tRNA		5	2	216918	217046	1	1489661	1489789	129	129	NA	NA	97.67
INTER	20	tRNA		5	2	216920	217047	1	748290	748417	128	128	NA	NA	98.44
INTER	20	tRNA		5	2	216920	217050	7	865896	866026	131	131	NA	NA	97.71
INTER	20	tRNA		5	2	216920	217059	R	339487	339626	140	140	NA	NA	97.14
INTER	77	Intergenic		2	2	222533	222813	3	1380546	1380268	281	279	NA	NA	89.08
INTRA	75	tRNA		8	2	323382	323558	2	175906	176081	177	176	147652	Tandem	89.89	tRNA (CAA)	tRNA (CAA)
INTER	75	tRNA		8	2	323390	323524	6	993059	992928	135	132	NA	NA	91.24
INTER	75	tRNA		8	2	323391	323523	R	1841903	1842032	133	130	NA	NA	87.41
INTRA	78	ORF		2	2	328420	328605	2	328504	328686	186	183	101	Tandem	87.63	Characterized orf19.1490 (MSB2)	Characterized orf19.1490 (MSB2)	Portion	Portion
INTRA	78	ORF		2	2	328504	328686	2	328420	328605	183	186	266	Tandem	87.63	Characterized orf19.1490 (MSB2)	Characterized orf19.1490 (MSB2)	Portion	Portion
INTER	18	ORF		3	2	338173	338272	1	641833	641929	100	97	NA	NA	95	orf19.1492	Intergenic Region	Portion		Unannotated ORF (partial)
INTER	18	ORF		3	2	338176	338272	3	1219782	1219686	97	97	NA	NA	94.9	orf19.1492	Intergenic Region	Portion		Unannotated ORF (partial)
INTER	18	ORF		3	2	338194	338272	1	641836	641914	79	79	NA	NA	100	orf19.1492	Intergenic Region	Portion		Unannotated ORF (partial)
INTER	18	ORF		3	2	338194	338272	3	1219836	1219758	79	79	NA	NA	100	orf19.1492	Intergenic Region	Portion		Unannotated ORF (partial)
INTER	18	ORF		3	2	338196	338272	3	1219837	1219761	77	77	NA	NA	100	orf19.1492	Intergenic Region	Portion		Unannotated ORF (partial)
INTRA	79	ORF		3	2	402722	404124	2	764903	763501	1403	1403	359377	Inverted	83.71	Characterized orf19.1523 (FMO1)	Characterized orf19.857 (FMO2)	Portion	Portion
INTRA	79	ORF		3	2	403292	404109	2	767483	766666	818	818	362557	Inverted	83.5	Characterized orf19.1523 (FMO1)	Characterized orf19.856 (IFK2)	Portion	Portion
INTER	80	ORF		2	2	413758	414073	3	543542	543226	316	317	NA	NA	87.11	orf19.1526	orf19.239	Portion	Portion
INTER	10	Intergenic		6	2	451071	451282	6	211311	211110	212	202	NA	NA	86.85
INTRA	81	ORF		2	2	454702	455021	2	517839	517517	320	323	62496	Inverted	88.89	Intergenic Region	Uncharacterized orf19.1581		Portion	Unannotated ORF (partial)
INTER	82	ORF		2	2	461416	461793	7	519203	519574	378	372	NA	NA	80.79	orf19.1552	orf19.6472	Single ORF	Single ORF
INTER	83	tRNA		5	2	496184	496270	R	1233248	1233335	87	88	NA	NA	95.45
INTER	83	tRNA		5	2	496189	496270	3	408130	408049	82	82	NA	NA	100
INTER	83	tRNA		5	2	496195	496270	R	515824	515749	76	76	NA	NA	100
INTER	83	tRNA		5	2	496195	496272	3	1232675	1232598	78	78	NA	NA	100
INTER	84	Intergenic		2	2	496372	496618	R	1939838	1940085	247	248	NA	NA	98.39
INTRA	81	ORF		2	2	517517	517839	2	455021	454702	323	320	63137	Inverted	88.89	Uncharacterized orf19.1581	Intergenic Region	Portion		Unannotated ORF (partial)
INTRA	85	ORF		2	2	525598	526490	2	614954	614063	893	892	87573	Inverted	98.43	Characterized orf19.1586 (FGR22)	Characterized orf19.5797 (PLC2)	Single ORF	Single ORF
INTRA	86	ORF		2	2	532066	536187	2	589663	585677	4122	3987	49490	Inverted	96.19	Uncharacterized orf19.1589, Uncharacterized orf19.5842	Uncharacterized orf19.5809, orf19.5811 (MET1)	Multi ORF	Multi ORF		LOH		INVERSION
INTRA	87	ORF		2	2	557409	558641	2	571460	570231	1233	1230	11590	Inverted	89.17	Uncharacterized orf19.5826	Characterized orf19.5820 (UGA6)	Portion	Portion
INTRA	87	ORF		2	2	570231	571460	2	558641	557409	1230	1233	14051	Inverted	89.17	Characterized orf19.5820 (UGA6)	Uncharacterized orf19.5826	Portion	Portion		LOH
INTER	88	ORF		2	2	575363	576541	R	278736	277558	1179	1179	NA	NA	82.22	orf19.5816	orf19.3234	Single ORF	Single ORF
INTRA	86	ORF		2	2	585677	589663	2	536187	532066	3987	4122	57597	Inverted	96.19	Uncharacterized orf19.5809, orf19.5811 (MET1)	Uncharacterized orf19.1589, Uncharacterized orf19.5842	Multi ORF	Multi ORF
INTRA	85	ORF		2	2	614063	614954	2	526490	525598	892	893	89356	Inverted	98.43	Characterized orf19.5797 (PLC2)	Characterized orf19.1586 (FGR22)	Single ORF	Single ORF
INTER	89	Intergenic		2	2	627923	627994	7	949616	949545	72	72	NA	NA	98.61
INTRA	43	LTR		14	2	654944	655414	2	1012416	1012886	471	471	357002	Tandem	99.15	Psi-2b LTR	Psi-2a LTR							Known
INTER	43	LTR		14	2	654945	655428	4	1260539	1261012	484	474	NA	NA	87.01					Unannotated LTR				Known
INTER	43	LTR		14	2	654945	655275	1	1294216	1293899	331	318	NA	NA	86.71					Unannotated LTR (partial)				Known
INTER	43	LTR		14	2	654945	655275	7	941692	942020	331	329	NA	NA	93.05					Unannotated LTR (partial)				Known
INTER	43	LTR		14	2	654945	655414	R	210586	211055	470	470	NA	NA	100									Known
INTER	43	LTR		14	2	654945	655414	R	215262	215731	470	470	NA	NA	100									Known
INTER	43	LTR		14	2	654945	655414	5	501179	500710	470	470	NA	NA	99.15									Known
INTER	43	LTR		14	2	654945	655414	R	1968323	1968792	470	470	NA	NA	92.99									Known
INTER	43	LTR		14	2	654945	655414	7	779616	779147	470	470	NA	NA	92.14									Known
INTER	43	LTR		14	2	654945	655415	7	674926	674456	471	471	NA	NA	93.43									Known
INTER	43	LTR		14	2	654945	655417	R	1474751	1474279	473	473	NA	NA	93.02									Known
INTER	43	LTR		14	2	654965	655414	R	2243231	2243670	450	440	NA	NA	85.11					Unannotated LTR				Known
INTRA	43	LTR		14	2	655184	655414	2	148011	148241	231	231	507403	Tandem	96.54	Psi-2b LTR	Intergenic Region			Unannotated LTR (partial)				Known
INTER	90	LTR		6	2	734881	735250	R	2258379	2258708	370	330	NA	NA	85.71					Unannotated LTR				Known
INTER	90	LTR		6	2	734881	735216	R	2154910	2154581	336	330	NA	NA	94.96									Known
INTER	90	LTR		6	2	734962	735248	4	357849	357562	287	288	NA	NA	96.53									Known
INTER	90	LTR		6	2	734962	735248	7	257242	256950	287	293	NA	NA	92.83									Known
INTER	90	LTR		6	2	734962	735250	4	1315551	1315847	289	297	NA	NA	93.6									Known
INTRA	79	ORF		3	2	763501	764903	2	404124	402722	1403	1403	362181	Inverted	83.71	Characterized orf19.857 (FMO2)	Characterized orf19.1523 (FMO1)	Portion	Portion
INTRA	79	ORF		3	2	763516	764423	2	766666	767573	908	908	2243	Tandem	90.31	Characterized orf19.5827 (FMO2)	Characterized orf19.856 (IFK2)	Portion	Portion
INTRA	79	ORF		3	2	766666	767483	2	404109	403292	818	818	364191	Inverted	83.5	Characterized orf19.856 (IFK2)	Characterized orf19.1523 (FMO1)	Portion	Portion
INTRA	79	ORF		3	2	766666	767573	2	763516	764423	908	908	4057	Tandem	90.31	Characterized orf19.856 (IFK2)	Characterized orf19.5827 (FMO2)	Portion	Portion
INTER	17	tRNA		5	2	790259	790336	1	536665	536588	78	78	NA	NA	98.72
INTER	17	tRNA		5	2	790263	790439	3	1715760	1715938	177	179	NA	NA	97.77
INTER	17	tRNA		5	2	790263	790440	3	592185	592006	178	180	NA	NA	98.33
INTRA	17	tRNA		5	2	790263	790439	2	810413	810589	177	177	19974	Tandem	99.44	tRNA (UCU, GAA)	tRNA (UCU, GAA)
INTRA	91	tRNA		5	2	790340	790442	2	2168510	2168611	103	102	1378068	Tandem	98.06	tRNA (GAA)	tRNA (GAA)
INTER	17	tRNA		5	2	810361	810589	3	592239	592007	229	233	NA	NA	92.27
INTER	17	tRNA		5	2	810406	810591	3	1715753	1715940	186	188	NA	NA	96.28
INTER	17	tRNA		5	2	810410	810486	1	536664	536588	77	77	NA	NA	100
INTRA	17	tRNA		5	2	810413	810589	2	790263	790439	177	177	20326	Tandem	99.44	tRNA (UCU, GAA)	tRNA (UCU, GAA)				LOH
INTRA	91	tRNA		5	2	810490	810590	2	2168510	2168610	101	101	1357920	Tandem	97.03	tRNA (GAA)	tRNA (GAA)
INTRA	38	LTR		3	2	863851	864057	2	177070	177277	207	208	686987	Tandem	92.79	Intergenic Region	Toroa-2a LTR			Unannotated LTR (partial)
INTER	38	Intergenic		3	2	863890	864035	1	1291703	1291851	146	149	NA	NA	92.62
INTRA	92	ORF		4	2	918676	919528	2	1330881	1331742	853	862	411353	Tandem	86.42	Uncharacterized orf19.4515	Uncharacterized orf19.31	Single ORF	Single ORF
INTRA	93	ORF		4	2	923324	923750	2	926319	926745	427	427	2569	Tandem	88.55	Uncharacterized orf19.4511	Characterized orf19.4510 (IFA4)	Portion	Portion
INTRA	93	ORF		4	2	926319	926745	2	923324	923750	427	427	3421	Tandem	88.55	Characterized orf19.4510 (IFA4)	Uncharacterized orf19.4511	Portion	Portion
INTRA	94	ORF		2	2	927023	927688	2	989374	988708	666	667	61020	Inverted	83.98	Characterized orf19.4510 (IFA4)	Characterized orf19.156 (FGR51)	Portion	Portion			CNV
INTER	32	ORF		2	2	932084	933244	1	983845	982685	1161	1161	NA	NA	89.42	orf19.4506	orf19.772	Portion	Portion
INTER	7	LTR		8	2	969358	969607	1	248451	248206	250	246	NA	NA	92.8									Known
INTER	7	LTR		8	2	969358	969608	5	306614	306861	251	248	NA	NA	95.22									Known
INTER	7	LTR		8	2	969358	969608	4	207809	207562	251	248	NA	NA	94.82									Known
INTER	7	LTR		8	2	969358	969608	R	543917	544163	251	247	NA	NA	91.24									Known
INTER	7	LTR		8	2	969358	969609	1	2516417	2516665	252	249	NA	NA	93.24									Known
INTER	7	LTR		8	2	969358	969609	5	1172004	1171756	252	249	NA	NA	93.24									Known
INTER	7	LTR		8	2	969464	969612	3	295982	296131	149	150	NA	NA	96									Known
INTRA	94	ORF		2	2	988708	989374	2	927688	927023	667	666	62351	Inverted	83.98	Characterized orf19.156 (FGR51)	Characterized orf19.4510 (IFA4)	Portion	Portion
INTRA	43	LTR		14	2	1012416	1012886	2	654944	655414	471	471	357942	Tandem	99.15	Psi-2a LTR	Psi-2b LTR							Known
INTER	43	LTR		14	2	1012417	1012887	4	1260539	1260999	471	461	NA	NA	87.5					Unannotated LTR				Known
INTER	43	LTR		14	2	1012417	1012747	1	1294216	1293899	331	318	NA	NA	86.71					Unannotated LTR (partial)				Known
INTER	43	LTR		14	2	1012417	1012747	7	941692	942020	331	329	NA	NA	93.05					Unannotated LTR (partial)				Known
INTER	43	LTR		14	2	1012417	1012886	5	501179	500710	470	470	NA	NA	99.57									Known
INTER	43	LTR		14	2	1012417	1012886	R	210586	211055	470	470	NA	NA	95.15									Known
INTER	43	LTR		14	2	1012417	1012886	R	215262	215731	470	470	NA	NA	99.15									Known
INTER	43	LTR		14	2	1012417	1012886	7	674926	674457	470	470	NA	NA	93.84									Known
INTER	43	LTR		14	2	1012417	1012886	R	1968323	1968792	470	470	NA	NA	93.84									Known
INTER	43	LTR		14	2	1012417	1012886	7	779616	779147	470	470	NA	NA	92.99									Known
INTER	43	LTR		14	2	1012417	1012886	R	1474751	1474282	470	470	NA	NA	92.98									Known
INTER	43	LTR		14	2	1012437	1012890	R	2243231	2243674	454	444	NA	NA	84.8					Unannotated LTR (partial)				Known
INTRA	43	LTR		14	2	1012656	1012887	2	148011	148242	232	232	864876	Tandem	96.12	Psi-2a LTR	Intergenic Region			Unannotated LTR (partial)				Known
INTER	95	tRNA		6	2	1024075	1024156	4	782810	782728	82	83	NA	NA	98.8									Known
INTER	95	tRNA		6	2	1024075	1024156	4	782653	782573	82	81	NA	NA	98.78									Known
INTER	95	tRNA		6	2	1024075	1024156	R	2009037	2009120	82	84	NA	NA	97.62									Known
INTER	95	tRNA		6	2	1024075	1024187	4	227872	227761	113	112	NA	NA	92.11									Known
INTER	95	tRNA		6	2	1024076	1024187	4	781039	781149	112	111	NA	NA	93.75									Known
INTER	2	LTR		4	2	1024191	1024587	1	45781	46167	397	387	NA	NA	93.47
INTER	2	LTR		4	2	1024192	1024586	1	537068	536676	395	393	NA	NA	95.45
INTER	2	LTR		4	2	1024192	1024588	1	42186	42572	397	387	NA	NA	93.22
INTER	96	tRNA		6	2	1027130	1027315	4	164277	164090	186	188	NA	NA	89.36
INTER	96	tRNA		6	2	1027219	1027316	4	168212	168309	98	98	NA	NA	94.9
INTER	96	tRNA		6	2	1027235	1027313	R	1713758	1713681	79	78	NA	NA	98.73
INTER	96	tRNA		6	2	1027235	1027315	4	780375	780295	81	81	NA	NA	100
INTER	96	tRNA		6	2	1027235	1027315	R	1882789	1882709	81	81	NA	NA	97.53
INTER	1	tRNA		4	2	1042507	1042591	1	1168879	1168963	85	85	NA	NA	97.65
INTER	1	tRNA		4	2	1042516	1042591	R	172514	172439	76	76	NA	NA	100
INTER	1	tRNA		4	2	1042518	1042606	1	42173	42086	89	88	NA	NA	95.51
INTER	97	tRNA		4	2	1077449	1077561	4	772477	772589	113	113	NA	NA	91.23
INTER	97	tRNA		4	2	1077465	1077556	4	1006859	1006949	92	91	NA	NA	91.58
INTER	97	tRNA		4	2	1077471	1077556	4	1006771	1006856	86	86	NA	NA	94.19
INTER	98	tRNA		5	2	1112279	1112411	4	1015627	1015498	133	130	NA	NA	89.55
INTRA	98	tRNA		5	2	1112283	1112383	2	1321621	1321521	101	101	209138	Inverted	98.02	tRNA (AAU)	tRNA (AAU)
INTER	98	tRNA		5	2	1112284	1112384	R	1813379	1813281	101	99	NA	NA	96.04
INTRA	98	tRNA		5	2	1112285	1112380	2	1620416	1620320	96	97	507940	Inverted	95.88	tRNA (AAU)	tRNA (AAU)
INTER	12	tRNA		7	2	1143925	1144022	R	1474107	1474205	98	99	NA	NA	98.99
INTER	12	tRNA		7	2	1143929	1144020	R	1243751	1243842	92	92	NA	NA	100
INTER	12	tRNA		7	2	1143930	1144021	R	1234738	1234647	92	92	NA	NA	100
INTER	99	ORF		2	2	1204554	1205036	R	526772	526290	483	483	NA	NA	81.28	orf19.5211	orf19.3733	Portion	Portion
INTER	100	tRNA		2	2	1237930	1238007	R	1919784	1919707	78	78	NA	NA	100
INTER	10	LTR		6	2	1302069	1302277	4	1194130	1193922	209	209	NA	NA	97.61									Known
INTER	10	LTR		6	2	1302076	1302279	1	280325	280122	204	204	NA	NA	98.53									Known
INTRA	10	LTR		6	2	1302080	1302285	2	216878	216677	206	202	1085608	Inverted	96.6	Phi-2b LTR	Phi-2a LTR							Known
INTER	98	tRNA		5	2	1321505	1321620	R	1813268	1813379	116	112	NA	NA	93.97
INTRA	98	tRNA		5	2	1321521	1321621	2	1112383	1112283	101	101	209338	Inverted	98.02	tRNA (AAU)	tRNA (AAU)
INTER	98	tRNA		5	2	1321523	1321619	4	1015528	1015623	97	96	NA	NA	95.88
INTRA	98	tRNA		5	2	1321524	1321619	2	1620320	1620416	96	97	298701	Tandem	97.94	tRNA (AAU)	tRNA (AAU)
INTRA	92	ORF		4	2	1330881	1331742	2	918676	919528	862	853	413066	Tandem	86.42	Uncharacterized orf19.31	Uncharacterized orf19.4515	Single ORF	Single ORF
INTER	101	ORF		2	2	1332762	1333051	R	2079960	2080249	290	290	NA	NA	92.81	orf19.33	orf19.7550	Portion	Portion
INTER	40	LTR		4	2	1333406	1333692	1	2911070	2910784	287	287	NA	NA	89.2									Known
INTER	40	LTR		4	2	1333407	1333691	R	2035506	2035222	285	285	NA	NA	88.81									Known
INTER	40	LTR		4	2	1333414	1333659	1	1292695	1292448	246	248	NA	NA	91.16					Unannotated LTR (partial)				Known
INTER	50	LTR		7	2	1416906	1417186	1	1815531	1815250	281	282	NA	NA	97.87									Known
INTER	50	LTR		7	2	1416907	1417103	R	611613	611816	197	204	NA	NA	91.18					Unannotated LTR (partial)				Known
INTER	50	LTR		7	2	1416908	1417187	R	1947582	1947302	280	281	NA	NA	98.58									Known
INTER	50	LTR		7	2	1416911	1417076	R	2203133	2203300	166	168	NA	NA	94.05					Unannotated LTR (partial)				Known
INTER	50	LTR		7	2	1416911	1417153	R	1968078	1968322	243	245	NA	NA	93.06									Known
INTER	102	Intergenic		3	2	1430579	1430927	4	743886	744233	349	348	NA	NA	89.71
INTER	102	Intergenic		3	2	1430580	1430930	5	968833	968480	351	354	NA	NA	86.48
INTER	35	LTR		7	2	1442453	1442735	1	1054954	1055235	283	282	NA	NA	96.47									Known
INTER	35	LTR		7	2	1442454	1442734	7	554200	553921	281	280	NA	NA	96.09									Known
INTER	35	LTR		7	2	1442454	1442734	7	560341	560062	281	280	NA	NA	96.09									Known
INTER	35	LTR		7	2	1442454	1442734	R	2150623	2150343	281	281	NA	NA	96.09									Known
INTER	35	LTR		7	2	1442454	1442734	1	3187235	3187513	281	279	NA	NA	95.73									Known
INTER	35	LTR		7	2	1442454	1442734	1	3187590	3187869	281	280	NA	NA	95.37									Known
INTER	103	LTR		4	2	1459312	1459638	3	1157981	1158305	327	325	NA	NA	94.8									Known
INTER	103	LTR		4	2	1459318	1459637	4	319726	319394	320	333	NA	NA	87.72									Known
INTER	104	tRNA		2	2	1600444	1600516	3	551163	551091	73	73	NA	NA	100
INTER	98	tRNA		5	2	1620312	1620416	R	1813277	1813378	105	102	NA	NA	92.38
INTER	98	tRNA		5	2	1620315	1620415	4	1015524	1015623	101	100	NA	NA	97.03
INTRA	98	tRNA		5	2	1620320	1620416	2	1112380	1112285	97	96	508131	Inverted	95.88	tRNA (AAU)	tRNA (AAU)
INTRA	98	tRNA		5	2	1620320	1620416	2	1321524	1321619	97	96	298892	Tandem	97.94	tRNA (AAU)	tRNA (AAU)
INTER	5	tRNA		6	2	1621651	1621740	1	204986	205074	90	89	NA	NA	97.78
INTER	5	tRNA		6	2	1621652	1621740	1	3061199	3061111	89	89	NA	NA	98.88
INTER	5	tRNA		6	2	1621652	1621740	5	1035136	1035224	89	89	NA	NA	97.75
INTER	5	tRNA		6	2	1621656	1621740	1	354222	354305	85	84	NA	NA	98.82
INTER	5	tRNA		6	2	1621657	1621740	3	845757	845841	84	85	NA	NA	96.47
INTER	105	ORF		2	2	1657186	1658517	5	968181	966849	1332	1333	NA	NA	83.11	orf19.2168	orf19.3924	Single ORF	Single ORF
INTER	106	Retrotransposon		6	2	1665235	1665547	6	987483	987796	313	314	NA	NA	98.73					Unannotated Retrotransposon (partial)				Known
INTER	106	Retrotransposon		6	2	1665235	1665548	R	1585645	1585333	314	313	NA	NA	98.1					Unannotated Retrotransposon (partial)				Known
INTER	106	Retrotransposon		6	2	1665235	1665722	6	986621	987109	488	489	NA	NA	98.77					Unannotated Retrotransposon (partial)				Known
INTRA	106	Retrotransposon		6	2	1665235	1665547	2	1669471	1669783	313	313	3924	Tandem	99.36	Retrotransposon Tca3-2	Retrotransposon Tca3-2							Known
INTER	106	Retrotransposon		6	2	1665266	1665547	7	608496	608778	282	283	NA	NA	95.76					Unannotated Retrotransposon (partial)				Known
INTER	106	LTR		6	2	1669200	1669784	6	987212	987797	585	586	NA	NA	98.63					Unannotated LTR/Retrotransposon (partial)				Known
INTER	106	LTR		6	2	1669471	1669783	6	986621	986934	313	314	NA	NA	98.73					Unannotated LTR/Retrotransposon (partial)				Known
INTER	106	LTR		6	2	1669471	1669783	R	1585645	1585334	313	312	NA	NA	98.09					Unannotated LTR/Retrotransposon (partial)				Known
INTRA	106	Retrotransposon		6	2	1669471	1669783	2	1665235	1665547	313	313	4548	Tandem	99.36	Retrotransposon Tca3-2	Retrotransposon Tca3-2							Known
INTER	106	Retrotransposon		6	2	1669502	1669783	7	608496	608778	282	283	NA	NA	96.11					Unannotated Retrotransposon (partial)				Known
INTER	107	ORF		2	2	1685750	1686854	R	551910	550806	1105	1105	NA	NA	80.34	orf19.5121	orf19.176	Portion	Single ORF
INTER	52	ORF		2	2	1690547	1691945	1	1843994	1842596	1399	1399	NA	NA	99.57	orf19.1435	orf19.382	Single ORF	Single ORF
INTER	54	Intergenic		3	2	1755500	1755709	1	2025229	2025019	210	211	NA	NA	97.63
INTRA	108	ORF	PGA55	MANY	2	1825880	1826160	2	1826663	1826943	281	281	503	Tandem	80.14	Characterized orf19.207 (PGA55)	Characterized orf19.207 (PGA55)	Portion	Portion
INTRA	108	ORF	PGA55	MANY	2	1825896	1826118	2	1827267	1827495	223	229	1149	Tandem	84.78	Characterized orf19.207 (PGA55)	Characterized orf19.207 (PGA55)	Portion	Portion
INTRA	108	ORF	PGA55	MANY	2	1825896	1826193	2	1827285	1827588	298	304	1092	Tandem	89.87	Characterized orf19.207 (PGA55)	Characterized orf19.207 (PGA55)	Portion	Portion
INTRA	108	ORF	PGA55	MANY	2	1825896	1826403	2	1827078	1827630	508	553	675	Tandem	88.07	Characterized orf19.207 (PGA55)	Characterized orf19.207 (PGA55)	Portion	Portion
INTRA	108	ORF	PGA55	MANY	2	1825896	1827264	2	1826238	1827630	1369	1393	1026	Tandem	81.09	Characterized orf19.207 (PGA55)	Characterized orf19.207 (PGA55)	Portion	Portion
INTRA	108	ORF	PGA55	MANY	2	1825900	1826118	2	1826206	1826424	219	219	88	Tandem	84.23	Characterized orf19.207 (PGA55)	Characterized orf19.207 (PGA55)	Portion	Portion
INTRA	108	ORF	PGA55	MANY	2	1825900	1826691	2	1826704	1827588	792	885	13	Tandem	81.34	Characterized orf19.207 (PGA55)	Characterized orf19.207 (PGA55)	Portion	Portion
INTRA	108	ORF	PGA55	MANY	2	1825912	1826079	2	1827457	1827630	168	174	1378	Tandem	89.08	Characterized orf19.207 (PGA55)	Characterized orf19.207 (PGA55)	Portion	Portion
INTRA	108	ORF	PGA55	MANY	2	1825912	1826179	2	1827076	1827361	268	286	897	Tandem	82.01	Characterized orf19.207 (PGA55)	Characterized orf19.207 (PGA55)	Portion	Portion
INTRA	108	ORF	PGA55	MANY	2	1825912	1826442	2	1826062	1826598	531	537	380	Tandem	83.99	Characterized orf19.207 (PGA55)	Characterized orf19.207 (PGA55)	Portion	Portion
INTRA	108	ORF	PGA55	MANY	2	1825912	1826691	2	1826734	1827588	780	855	43	Tandem	84.87	Characterized orf19.207 (PGA55)	Characterized orf19.207 (PGA55)	Portion	Portion
INTRA	108	ORF	PGA55	MANY	2	1825912	1826849	2	1826560	1827575	938	1016	289	Tandem	81.09	Characterized orf19.207 (PGA55)	Characterized orf19.207 (PGA55)	Portion	Portion
INTRA	108	ORF	PGA55	MANY	2	1825912	1827264	2	1826236	1827630	1353	1395	1028	Tandem	85.18	Characterized orf19.207 (PGA55)	Characterized orf19.207 (PGA55)	Portion	Portion
INTRA	108	ORF	PGA55	MANY	2	1826062	1826496	2	1825912	1826364	435	453	584	Tandem	80.46	Characterized orf19.207 (PGA55)	Characterized orf19.207 (PGA55)	Portion	Portion
INTRA	108	ORF	PGA55	MANY	2	1826118	1827033	2	1826616	1827588	916	973	417	Tandem	87.79	Characterized orf19.207 (PGA55)	Characterized orf19.207 (PGA55)	Portion	Portion
INTRA	108	ORF	PGA55	MANY	2	1826206	1826787	2	1825900	1826460	582	561	887	Tandem	85.23	Characterized orf19.207 (PGA55)	Characterized orf19.207 (PGA55)	Portion	Portion
INTRA	108	ORF	PGA55	MANY	2	1826231	1826517	2	1827296	1827588	287	293	779	Tandem	90.85	Characterized orf19.207 (PGA55)	Characterized orf19.207 (PGA55)	Portion	Portion
INTRA	108	ORF	PGA55	MANY	2	1826238	1827630	2	1825896	1827264	1393	1369	1734	Tandem	81.02	Characterized orf19.207 (PGA55)	Characterized orf19.207 (PGA55)	Portion	Portion
INTRA	108	ORF	PGA55	MANY	2	1826249	1826364	2	1826381	1826496	116	116	17	Tandem	88.24	Characterized orf19.207 (PGA55)	Characterized orf19.207 (PGA55)	Portion	Portion
INTRA	108	ORF	PGA55	MANY	2	1826256	1827414	2	1826424	1827588	1159	1165	990	Tandem	80.14	Characterized orf19.207 (PGA55)	Characterized orf19.207 (PGA55)	Portion	Portion
INTRA	108	ORF	PGA55	MANY	2	1826336	1827266	2	1825880	1826753	931	874	1386	Tandem	82.12	Characterized orf19.207 (PGA55)	Characterized orf19.207 (PGA55)	Portion	Portion
INTRA	108	ORF	PGA55	MANY	2	1826381	1826849	2	1827089	1827575	469	487	240	Tandem	89.41	Characterized orf19.207 (PGA55)	Characterized orf19.207 (PGA55)	Portion	Portion
INTRA	108	ORF	PGA55	MANY	2	1826388	1827588	2	1825896	1827033	1201	1138	1692	Tandem	81.78	Characterized orf19.207 (PGA55)	Characterized orf19.207 (PGA55)	Portion	Portion
INTRA	108	ORF	PGA55	MANY	2	1826388	1827780	2	1825896	1827180	1393	1285	1884	Tandem	82.85	Characterized orf19.207 (PGA55)	Characterized orf19.207 (PGA55)	Portion	Portion
INTRA	108	ORF	PGA55	MANY	2	1826560	1827575	2	1825912	1826849	1016	938	1663	Tandem	81.09	Characterized orf19.207 (PGA55)	Characterized orf19.207 (PGA55)	Portion	Portion
INTRA	108	ORF	PGA55	MANY	2	1826704	1827588	2	1825900	1826691	885	792	1688	Tandem	81.34	Characterized orf19.207 (PGA55)	Characterized orf19.207 (PGA55)	Portion	Portion
INTRA	108	ORF	PGA55	MANY	2	1826729	1827204	2	1827107	1827588	476	482	97	Tandem	95.05	Characterized orf19.207 (PGA55)	Characterized orf19.207 (PGA55)	Portion	Portion
INTRA	108	ORF	PGA55	MANY	2	1826729	1827552	2	1826933	1827771	824	839	619	Tandem	82.71	Characterized orf19.207 (PGA55)	Characterized orf19.207 (PGA55)	Portion	Portion
INTRA	108	ORF	PGA55	MANY	2	1826738	1827264	2	1827137	1827630	527	494	127	Tandem	83.4	Characterized orf19.207 (PGA55)	Characterized orf19.207 (PGA55)	Portion	Portion
INTRA	108	ORF	PGA55	MANY	2	1826933	1827588	2	1826729	1827414	656	686	859	Tandem	83.9	Characterized orf19.207 (PGA55)	Characterized orf19.207 (PGA55)	Portion	Portion
INTRA	108	ORF	PGA55	MANY	2	1827076	1827630	2	1825912	1826403	555	492	1718	Tandem	80.29	Characterized orf19.207 (PGA55)	Characterized orf19.207 (PGA55)	Portion	Portion
INTRA	108	ORF	PGA55	MANY	2	1827089	1827575	2	1826381	1826849	487	469	1194	Tandem	89.41	Characterized orf19.207 (PGA55)	Characterized orf19.207 (PGA55)	Portion	Portion
INTRA	108	ORF	PGA55	MANY	2	1827107	1827588	2	1826729	1827204	482	476	859	Tandem	95.05	Characterized orf19.207 (PGA55)	Characterized orf19.207 (PGA55)	Portion	Portion
INTRA	108	ORF	PGA55	MANY	2	1827137	1827630	2	1826738	1827264	494	527	892	Tandem	83.4	Characterized orf19.207 (PGA55)	Characterized orf19.207 (PGA55)	Portion	Portion
INTRA	108	ORF	PGA55	MANY	2	1827267	1827696	2	1825896	1826313	430	418	1800	Tandem	81.05	Characterized orf19.207 (PGA55)	Characterized orf19.207 (PGA55)	Portion	Portion
INTRA	108	ORF	PGA55	MANY	2	1827285	1827588	2	1825896	1826193	304	298	1692	Tandem	89.87	Characterized orf19.207 (PGA55)	Characterized orf19.207 (PGA55)	Portion	Portion
INTRA	108	ORF	PGA55	MANY	2	1827296	1827588	2	1826231	1826517	293	287	1357	Tandem	90.85	Characterized orf19.207 (PGA55)	Characterized orf19.207 (PGA55)	Portion	Portion
INTRA	108	ORF	PGA55	MANY	2	1827457	1827630	2	1825912	1826079	174	168	1718	Tandem	89.08	Characterized orf19.207 (PGA55)	Characterized orf19.207 (PGA55)	Portion	Portion
INTRA	109	ORF		2	2	1831891	1832119	2	1832611	1832839	229	229	492	Tandem	86.09	Uncharacterized orf19.206	Uncharacterized orf19.206	Portion	Portion
INTRA	110	ORF		2	2	1832169	1832395	2	1832394	1832620	227	227	1	Tandem	89.43	Uncharacterized orf19.206	Uncharacterized orf19.206	Portion	Portion
INTRA	110	ORF		2	2	1832394	1832620	2	1832169	1832395	227	227	451	Tandem	89.43	Uncharacterized orf19.206	Uncharacterized orf19.206	Portion	Portion
INTRA	109	ORF		2	2	1832611	1832839	2	1831891	1832119	229	229	948	Tandem	86.09	Uncharacterized orf19.206	Uncharacterized orf19.206	Portion	Portion
INTRA	111	Intergenic		2	2	1877253	1877637	2	1964772	1964380	385	393	86743	Inverted	87.53
INTER	13	LTR		6	2	1886922	1887317	R	2243680	2244076	396	397	NA	NA	98.24									Known
INTER	13	LTR		6	2	1886922	1887317	1	404265	403870	396	396	NA	NA	98.23									Known
INTER	13	LTR		6	2	1886925	1887311	R	427340	426955	387	386	NA	NA	91.49									Known
INTER	13	LTR		6	2	1886925	1887313	R	961463	961851	389	389	NA	NA	98.71									Known
INTER	13	LTR		6	2	1887049	1887307	5	192994	192734	259	261	NA	NA	86.59					Unannotated LTR (partial)				Known
INTER	4	tRNA		4	2	1888119	1888232	1	126508	126621	114	114	NA	NA	93.91
INTER	4	tRNA		4	2	1888123	1888232	1	1116094	1116203	110	110	NA	NA	91.07
INTER	4	tRNA		4	2	1888130	1888232	R	1230198	1230097	103	102	NA	NA	94.17
INTER	112	LTR		2	2	1929503	1929982	4	586328	585849	480	480	NA	NA	93.33					Unannotated LTR	LOH			Known
INTRA	113	ORF	EAP1	MANY	2	1951749	1951916	2	1951920	1952087	168	168	4	Tandem	94.64	Characterized orf19.1401 (EAP1)	Characterized orf19.1401 (EAP1)	Portion	Portion
INTRA	113	ORF	EAP1	MANY	2	1951920	1952087	2	1951749	1951916	168	168	338	Tandem	94.64	Characterized orf19.1401 (EAP1)	Characterized orf19.1401 (EAP1)	Portion	Portion
INTRA	113	ORF	EAP1	MANY	2	1952284	1952370	2	1952812	1952898	87	87	442	Tandem	97.7	Characterized orf19.1401 (EAP1)	Characterized orf19.1401 (EAP1)	Portion	Portion
INTRA	113	ORF	EAP1	MANY	2	1952284	1952634	2	1952476	1952898	351	423	158	Tandem	80.38	Characterized orf19.1401 (EAP1)	Characterized orf19.1401 (EAP1)	Portion	Portion
INTRA	113	ORF	EAP1	MANY	2	1952289	1952766	2	1952349	1952898	478	550	417	Tandem	83.82	Characterized orf19.1401 (EAP1)	Characterized orf19.1401 (EAP1)	Portion	Portion
INTRA	113	ORF	EAP1	MANY	2	1952349	1952898	2	1952289	1952766	550	478	609	Tandem	83.82	Characterized orf19.1401 (EAP1)	Characterized orf19.1401 (EAP1)	Portion	Portion
INTRA	113	ORF	EAP1	MANY	2	1952476	1952898	2	1952284	1952766	423	483	614	Tandem	81.41	Characterized orf19.1401 (EAP1)	Characterized orf19.1401 (EAP1)	Portion	Portion
INTRA	113	ORF	EAP1	MANY	2	1952553	1952647	2	1952289	1952383	95	95	358	Tandem	95.79	Characterized orf19.1401 (EAP1)	Characterized orf19.1401 (EAP1)	Portion	Portion
INTRA	113	ORF	EAP1	MANY	2	1952680	1952779	2	1952284	1952383	100	100	495	Tandem	97	Characterized orf19.1401 (EAP1)	Characterized orf19.1401 (EAP1)	Portion	Portion
INTRA	113	ORF	EAP1	MANY	2	1952812	1952898	2	1952284	1952370	87	87	614	Tandem	97.7	Characterized orf19.1401 (EAP1)	Characterized orf19.1401 (EAP1)	Portion	Portion
INTRA	111	Intergenic		2	2	1964380	1964772	2	1877637	1877253	393	385	87519	Inverted	87.53
INTRA	114	ORF		2	2	1998239	1998961	2	2049600	2050322	723	723	50639	Tandem	97.79	Uncharacterized orf19.1372	Ucharacterized orf19.1782	Single ORF	Single ORF
INTRA	114	ORF		2	2	2049600	2050322	2	1998239	1998961	723	723	52083	Tandem	97.79	Uracterized orf19.1782	Uncharacterized orf19.1372	Single ORF	Single ORF
INTRA	115	ORF		2	2	2050973	2051814	2	2089747	2088915	842	833	37101	Inverted	88.05	Uncharacterized orf19.1780	orf19.1765	Portion	Portion
INTER	116	ORF		3	2	2064857	2065992	R	1118222	1117090	1136	1133	NA	NA	88.64	orf19.1774	orf19.638	Single ORF	Single ORF
INTER	116	ORF		3	2	2064857	2066006	5	835097	833951	1150	1147	NA	NA	90.26	orf19.1774	orf19.1117	Single ORF	Single ORF
INTRA	115	ORF		2	2	2088915	2089747	2	2051814	2050973	833	842	38774	Inverted	88.05	orf19.1765	Uncharacterized orf19.1780	Portion	Portion
INTER	91	tRNA		5	2	2168510	2168609	3	592106	592005	100	102	NA	NA	98.04									Known
INTER	91	tRNA		5	2	2168510	2168610	3	1715839	1715939	101	101	NA	NA	97.03									Known
INTRA	91	tRNA		5	2	2168510	2168610	2	810490	810590	101	101	1358120	Tandem	97.03	tRNA (GAA)	tRNA (GAA)							Known
INTRA	91	tRNA		5	2	2168510	2168611	2	790340	790442	102	103	1378271	Tandem	98.06	tRNA (GAA)	tRNA (GAA)							Known
INTER	37	LTR		13	2	2168638	2168716	4	637135	637213	79	79	NA	NA	100									Known
INTER	37	LTR		13	2	2168639	2168716	6	889168	889091	78	78	NA	NA	100									Known
INTER	37	LTR		13	2	2168640	2168716	1	2590792	2590868	77	77	NA	NA	100									Known
INTER	37	LTR		13	2	2168640	2168716	4	1179178	1179102	77	77	NA	NA	100									Known
INTER	37	LTR		13	2	2168640	2168716	R	626194	626118	77	77	NA	NA	100									Known
INTER	37	LTR		13	2	2168640	2168716	R	1097846	1097922	77	77	NA	NA	100									Known
INTER	37	LTR		13	2	2168710	2169102	1	1291370	1291766	393	397	NA	NA	92.7					Unannotated LTR (partial)				Known
INTER	37	LTR		13	2	2168710	2169035	R	1971302	1971627	326	326	NA	NA	94.79									Known
INTER	37	LTR		13	2	2168710	2169042	3	822589	822259	333	331	NA	NA	91.59									Known
INTER	37	LTR		13	2	2168710	2169043	6	325842	325508	334	335	NA	NA	93.13									Known
INTER	37	LTR		13	2	2168718	2169035	4	637321	637638	318	318	NA	NA	95.28									Known
INTER	37	LTR		13	2	2168718	2169035	R	1098030	1098347	318	318	NA	NA	94.97									Known
INTER	37	LTR		13	2	2168718	2169035	4	1178994	1178676	318	319	NA	NA	94.67									Known
INTER	37	LTR		13	2	2168718	2169035	1	2590976	2591293	318	318	NA	NA	94.65									Known
INTER	37	LTR		13	2	2168718	2169035	6	888983	888666	318	318	NA	NA	94.65									Known
INTER	37	LTR		13	2	2168718	2169042	R	626010	625686	325	325	NA	NA	93.85									Known
INTER	92	LTR		4	2	2169098	2169362	R	1939834	1939570	265	265	NA	NA	93.96
INTER	93	LTR		4	2	2169099	2169233	4	464455	464321	135	135	NA	NA	92.59
INTER	11	ORF		2	2	2189975	2190759	1	333322	334106	785	785	NA	NA	97.45	orf19.5341	orf19.3354	Single ORF	Portion		LOH
INTER	39	LTR		12	3	14093	14372	1	1292161	1292441	280	281	NA	NA	92.96									Known
INTER	39	LTR		12	3	14097	14373	4	393999	393722	277	278	NA	NA	87.99					Unannotated LTR/TLO (partial)				Known
INTER	39	LTR		12	3	14098	14372	7	608495	608221	275	275	NA	NA	97.82									Known
INTRA	39	LTR		12	3	14098	14373	3	521812	521535	276	278	507162	Inverted	89.72	TLO7, Rho-3a LTR	Rho-3c LTR							Known
INTER	42	ORF		9	3	14389	14549	1	1293577	1293737	161	161	NA	NA	91.46				Single ORF	Unannotated TLO (partial)
INTER	49	LTR		3	3	14553	14751	1	1808229	1808031	199	199	NA	NA	98.99									Known
INTER	49	LTR		3	3	14553	14751	R	2154256	2154454	199	199	NA	NA	97.99									Known
INTER	42	ORF		9	3	14755	14951	1	1293739	1293939	197	201	NA	NA	95.52				Single ORF	Unannotated TLO (partial)
INTRA	117	ORF		2	3	90996	91206	3	91116	91326	211	211	90	Tandem	84.33	Uncharacterized orf19.5401	Uncharacterized orf19.5401	Portion	Portion
INTRA	117	ORF		2	3	91116	91326	3	90996	91206	211	211	330	Tandem	84.33	Uncharacterized orf19.5401	Uncharacterized orf19.5401	Portion	Portion
INTER	118	tRNA		2	3	196047	196166	4	157035	157154	120	120	NA	NA	99.17
INTRA	119	ORF	Adhesin-like	MANY	3	269802	270218	3	270534	270944	417	411	316	Tandem	82.27	Uncharacterized orf19.1725	Uncharacterized orf19.1725	Portion	Portion
INTRA	119	ORF	Adhesin-like	MANY	3	270200	270394	3	269798	269992	195	195	596	Tandem	87.69	Uncharacterized orf19.1725	Uncharacterized orf19.1725	Portion	Portion
INTRA	119	ORF	Adhesin-like	MANY	3	270534	270944	3	269802	270218	411	417	1142	Tandem	82.27	Uncharacterized orf19.1725	Uncharacterized orf19.1725	Portion	Portion
INTRA	119	ORF	Adhesin-like	MANY	3	270890	271153	3	270941	271231	264	291	212	Tandem	87.29	Uncharacterized orf19.1725	Uncharacterized orf19.1725	Portion	Portion
INTRA	119	ORF	Adhesin-like	MANY	3	270941	271231	3	270890	271153	291	264	341	Tandem	87.29	Uncharacterized orf19.1725	Uncharacterized orf19.1725	Portion	Portion
INTER	7	LTR		8	3	295740	295866	5	306606	306733	127	128	NA	NA	94.53					Unannotated LTR (partial)	LOH			Known
INTER	7	LTR		8	3	295746	295866	1	2516415	2516536	121	122	NA	NA	95.9					Unannotated LTR (partial)				Known
INTER	7	LTR		8	3	295746	295866	4	207811	207690	121	122	NA	NA	94.26					Unannotated LTR (partial)				Known
INTER	7	LTR		8	3	295746	295866	5	1172006	1171885	121	122	NA	NA	95.9					Unannotated LTR (partial)				Known
INTER	7	LTR		8	3	295982	296131	2	969464	969612	150	149	NA	NA	96					Unannotated LTR (partial)				Known
INTER	7	LTR		8	3	295987	296126	1	248344	248206	140	139	NA	NA	93.57					Unannotated LTR (partial)				Known
INTER	7	LTR		8	3	295987	296128	1	2516524	2516665	142	142	NA	NA	99.3					Unannotated LTR (partial)				Known
INTER	7	LTR		8	3	295987	296127	4	207702	207562	141	141	NA	NA	99.29					Unannotated LTR (partial)				Known
INTER	7	LTR		8	3	295987	296127	5	306721	306861	141	141	NA	NA	99.29					Unannotated LTR (partial)				Known
INTER	7	LTR		8	3	295987	296128	5	1171897	1171756	142	142	NA	NA	99.3					Unannotated LTR (partial)				Known
INTER	7	LTR		8	3	296006	296127	R	544042	544163	122	122	NA	NA	96.72					Unannotated LTR (partial)				Known
INTER	76	Intergenic		5	3	296350	296584	4	1541197	1541430	235	234	NA	NA	91.14
INTER	76	Intergenic		5	3	296364	296575	7	185573	185784	212	212	NA	NA	91.08
INTER	9	LTR		3	3	359632	359942	1	277091	277401	311	311	NA	NA	98.39									Known
INTER	9	LTR		3	3	359632	359942	5	535122	534812	311	311	NA	NA	98.07									Known
INTER	83	tRNA		5	3	408042	408124	R	515742	515824	83	83	NA	NA	100
INTER	83	tRNA		5	3	408042	408128	R	1233342	1233256	87	87	NA	NA	97.7
INTRA	83	tRNA		5	3	408042	408124	3	1232593	1232675	83	83	824469	Tandem	98.8	tRNA (AAC)	tRNA (AAC)
INTER	83	tRNA		5	3	408049	408130	2	496270	496189	82	82	NA	NA	100
INTER	120	tRNA		4	3	412125	412221	R	1608032	1608125	97	94	NA	NA	95.88
INTER	120	tRNA		4	3	412134	412219	R	1787782	1787866	86	85	NA	NA	97.67
INTER	120	tRNA		4	3	412134	412219	R	1788879	1788795	86	85	NA	NA	97.67
INTRA	121	tRNA		2	3	423764	423920	3	1595175	1595335	157	161	1171255	Tandem	92.59	tRNA (GUA)	tRNA (GUA)
INTER	122	ORF		2	3	430645	431285	6	758001	757373	641	629	NA	NA	83	orf19.1652	orf19.5723	Portion	Portion
INTER	123	tRNA		7	3	447598	447714	R	1881169	1881055	117	115	NA	NA	95.73
INTRA	123	tRNA		7	3	447598	447714	3	835777	835892	117	116	388063	Tandem	89.34	tRNA (UUC)	tRNA (UUC)
INTER	123	tRNA		7	3	447607	447716	5	217678	217567	110	112	NA	NA	94.64
INTER	123	tRNA		7	3	447608	447714	5	769748	769641	107	108	NA	NA	96.3
INTRA	123	tRNA		7	3	447610	447716	3	703288	703180	107	109	255464	Inverted	95.41	tRNA (UUC)	tRNA (UUC)
INTER	123	tRNA		7	3	447613	447714	5	217562	217462	102	101	NA	NA	97.06
INTER	39	LTR		12	3	521534	521812	4	393721	393998	279	278	NA	NA	97.49					Unannotated LTR				Known
INTER	39	LTR		12	3	521535	521798	1	3186970	3187232	264	263	NA	NA	89.55									Known
INTER	39	LTR		12	3	521535	521812	2	4886	4611	278	276	NA	NA	90.07									Known
INTER	39	LTR		12	3	521535	521812	5	2535	2260	278	276	NA	NA	90.07									Known
INTER	39	LTR		12	3	521535	521812	6	6183	5908	278	276	NA	NA	89.72									Known
INTRA	39	LTR		12	3	521535	521812	3	1787605	1787880	278	276	1265793	Tandem	89.01	Rho-3c LTR	Rho-3b LTR, TLO8							Known
INTRA	39	LTR		12	3	521535	521812	3	14373	14098	278	276	507714	Inverted	89.72	Rho-3c LTR	TLO7, Rho-3a LTR							Known
INTER	39	LTR		12	3	521536	521812	1	1935739	1936015	277	277	NA	NA	97.47					Unannotated LTR				Known
INTER	39	LTR		12	3	521536	521813	1	1292441	1292164	278	278	NA	NA	92.53									Known
INTER	80	ORF		2	3	543226	543542	2	414073	413758	317	316	NA	NA	87.11	orf19.239	orf19.1526	Portion	Portion
INTER	104	tRNA		2	3	551091	551163	2	1600516	1600444	73	73	NA	NA	100
INTER	91	tRNA		5	3	592005	592106	2	2168609	2168510	102	100	NA	NA	98.04
INTER	17	tRNA		5	3	592006	592185	2	790440	790263	180	178	NA	NA	98.33
INTER	17	tRNA		5	3	592007	592239	2	810589	810361	233	229	NA	NA	92.27
INTRA	17	tRNA		5	3	592007	592196	3	1715938	1715749	190	190	1123553	Inverted	98.95	tRNA (GAA, UUC)	tRNA (GAA, UUC)
INTER	17	tRNA		5	3	592111	592187	1	536587	536663	77	77	NA	NA	100
INTRA	124	ORF		2	3	621732	624946	3	639446	636234	3215	3213	11288	Inverted	99.53	Uncharacterized orf19.279, Uncharacterized orf19.280, Uncharacterized orf19.281, Uncharacterized orf19.284	orf19.297 (DTD2), Uncharacterized orf19.296, Uncharacterized orf19.295, Uncharacterized orf19.292	Multi ORF	Multi ORF		LOH	CNV	INVERSION
INTRA	124	ORF		2	3	636234	639446	3	624946	621732	3213	3215	17714	Inverted	99.53	orf19.297 (DTD2), Uncharacterized orf19.296, Uncharacterized orf19.295, Uncharacterized orf19.292	Uncahracterized orf19.279, Uncharacterized orf19.280, Uncharacterized orf19.281, Uncharacterized orf19.284	Multi ORF	Multi ORF
INTRA	125	ORF	PGA18	MANY	3	644714	644947	3	644990	645220	234	231	43	Tandem	89.32	Characterized orf19.301 (PGA18)	Characterized orf19.301 (PGA18)	Portion	Portion
INTRA	125	ORF	PGA18	MANY	3	644741	645162	3	644891	645285	422	395	271	Tandem	86.97	Characterized orf19.301 (PGA18)	Characterized orf19.301 (PGA18)	Portion	Portion
INTRA	125	ORF	PGA18	MANY	3	644891	645285	3	644741	645162	395	422	544	Tandem	86.97	Characterized orf19.301 (PGA18)	Characterized orf19.301 (PGA18)	Portion	Portion
INTRA	125	ORF	PGA18	MANY	3	644990	645220	3	644714	644947	231	234	506	Tandem	89.32	Characterized orf19.301 (PGA18)	Characterized orf19.301 (PGA18)	Portion	Portion
INTRA	125	ORF	PGA18	MANY	3	645657	645822	3	645831	645996	166	166	9	Tandem	93.37	Characterized orf19.301 (PGA18)	Characterized orf19.301 (PGA18)	Portion	Portion
INTRA	125	ORF	PGA18	MANY	3	645831	645996	3	645657	645822	166	166	339	Tandem	93.37	Characterized orf19.301 (PGA18)	Characterized orf19.301 (PGA18)	Portion	Portion
INTRA	126	ORF		2	3	663206	664969	3	770128	768365	1764	1764	103396	Inverted	94.11	Characterized orf19.309 (DAL5)	Characterized orf19.309 (DAL9)	Single ORF	Single ORF
INTRA	127	ORF		2	3	665300	669412	3	767893	763780	4113	4114	94368	Inverted	99.13	Uncharacterized orf19.310, orf19.313 (DAL4)	orf19.6958 (ECM18), Uncharacterized orf19.6957, orf19.360 (FUR4)	Multi ORF	Multi ORF		LOH		INVERSION
INTRA	128	tRNA		2	3	681259	681359	3	1039058	1039154	101	97	357699	Tandem	92.16	tRNA (CUU)	tRNA (CUU)
INTER	123	tRNA		7	3	703171	703275	5	217452	217555	105	104	NA	NA	93.33
INTER	123	tRNA		7	3	703179	703291	5	217566	217677	113	112	NA	NA	97.35
INTRA	123	tRNA		7	3	703180	703288	3	447716	447610	109	107	255678	Inverted	95.41	tRNA (UUC)	tRNA (UUC)
INTER	123	tRNA		7	3	703182	703287	R	1881055	1881158	106	104	NA	NA	97.17
INTER	123	tRNA		7	3	703182	703291	5	769641	769748	110	108	NA	NA	94.55
INTRA	123	tRNA		7	3	703182	703287	3	835892	835785	106	108	132498	Inverted	92.79	tRNA (UUC)	tRNA (UUC)
INTRA	129	ORF		2	3	757555	758825	3	1261605	1260329	1271	1277	501504	Inverted	83.98	Uncharacterized orf19.355	orf19.6999	Single ORF	Single ORF
INTRA	130	ORF		2	3	761588	763333	3	786552	784807	1746	1746	21474	Inverted	94.91	Uncharacterized orf19.357, Characterized orf19.359 (GTT12)	orf19.6947, orf19.6944	Multi ORF	Multi ORF		LOH
INTRA	127	ORF		2	3	763780	767893	3	669412	665300	4114	4113	102593	Inverted	99.13	orf19.6958 (ECM18), Uncharacterized orf19.6957, orf19.360 (FUR4)	Uncharacterized orf19.310, orf19.313 (DAL4)	Multi ORF	Multi ORF		LOH
INTRA	126	ORF		2	3	768365	770128	3	664969	663206	1764	1764	106922	Inverted	94.11	Characterized orf19.309 (DAL9)	Characterized orf19.309 (DAL5)	Single ORF	Single ORF		LOH
INTRA	130	ORF		2	3	784807	786552	3	763333	761588	1746	1746	24964	Inverted	94.91	orf19.6947, orf19.6944	Uncharacterized orf19.357, Characterized orf19.359 (GTT12)	Multi ORF	Multi ORF
INTER	26	ORF		2	3	817961	818353	1	872399	872007	393	393	NA	NA	89.31	orf19.6925	orf19.1052	Single ORF	Single ORF
INTER	25	ORF		2	3	818896	819238	1	871142	870800	343	343	NA	NA	90.96	orf19.6924	orf19.1051	Portion	Portion
INTER	37	LTR		13	3	822252	822760	R	625679	626195	509	517	NA	NA	90.73									Known
INTER	37	LTR		13	3	822259	822665	1	1291703	1291286	407	418	NA	NA	91.87					Unannotated ORF/LTR (partial)	LOH			Known
INTER	37	LTR		13	3	822259	822589	2	2169042	2168710	331	333	NA	NA	91.59									Known
INTER	37	LTR		13	3	822259	822759	6	325509	326018	501	510	NA	NA	90.41									Known
INTER	37	LTR		13	3	822260	822752	R	1971633	1971132	493	502	NA	NA	91.24									Known
INTER	37	LTR		13	3	822260	822759	4	637644	637137	500	508	NA	NA	91.55									Known
INTER	37	LTR		13	3	822260	822759	1	2591299	2590792	500	508	NA	NA	91.36									Known
INTER	37	LTR		13	3	822260	822759	4	1178670	1179178	500	509	NA	NA	91.18									Known
INTER	37	LTR		13	3	822260	822759	6	888660	889167	500	508	NA	NA	91.16									Known
INTER	37	LTR		13	3	822260	822759	R	1098353	1097846	500	508	NA	NA	91.16									Known
INTER	123	tRNA		7	3	835776	835892	R	1881170	1881055	117	116	NA	NA	90.98
INTRA	123	tRNA		7	3	835777	835892	3	447598	447714	116	117	388294	Tandem	89.34	tRNA (UUC)	tRNA (UUC)
INTER	123	tRNA		7	3	835784	835892	5	217567	217462	109	106	NA	NA	88.99
INTER	123	tRNA		7	3	835785	835892	5	217673	217569	108	105	NA	NA	91.82
INTRA	123	tRNA		7	3	835785	835892	3	703287	703182	108	106	132710	Inverted	92.79	tRNA (UUC)	tRNA (UUC)
INTER	123	tRNA		7	3	835794	835892	5	769736	769641	99	96	NA	NA	92.08
INTER	5	tRNA		6	3	845754	845841	5	1035138	1035224	88	87	NA	NA	97.73
INTER	5	tRNA		6	3	845757	845841	1	354223	354305	85	83	NA	NA	96.47
INTER	5	tRNA		6	3	845757	845841	1	3061194	3061110	85	85	NA	NA	96.47
INTER	5	tRNA		6	3	845757	845841	2	1621657	1621740	85	84	NA	NA	96.47
INTER	5	tRNA		6	3	845757	845846	1	204992	205081	90	90	NA	NA	94.44
INTRA	131	ORF		3	3	849852	850754	3	1149629	1148727	903	903	297973	Inverted	82.5	Characterized orf19.918 (CDR11)	Characterized orf19.6000 (CDR1)	Portion	Portion
INTRA	131	ORF		3	3	849852	850754	3	1051465	1050563	903	903	199809	Inverted	83.06	Characterized orf19.918 (CDR11)	Characterized orf19.5958 (CDR2)	Portion	Portion
INTER	66	ORF		2	3	865900	866291	1	2883130	2883525	392	396	NA	NA	98.48	snR17A	orf19.4949	Single ORF	Portion
INTRA	128	tRNA		2	3	1039058	1039154	3	681259	681359	97	101	357895	Tandem	92.16	tRNA (CUU)	tRNA (CUU)
INTRA	132	ORF		2	3	1048245	1049532	3	1146409	1147696	1288	1288	96877	Tandem	92.39	Characterized orf19.5958 (CDR2)	Characterized orf19.6000 (CDR1)	Portion	Portion
INTRA	133	ORF		2	3	1050245	1052178	3	1148409	1150342	1934	1934	96231	Tandem	92.41	Characterized orf19.5958 (CDR2)	Characterized orf19.6000 (CDR1)	Portion	Portion
INTRA	131	ORF		3	3	1050563	1051465	3	850754	849852	903	903	201613	Inverted	83.06	Characterized orf19.5958 (CDR2)	Characterized orf19.918 (CDR11)	Portion	Portion
INTRA	132	ORF		2	3	1146409	1147696	3	1048245	1049532	1288	1288	99451	Tandem	92.39	Characterized orf19.6000 (CDR1)	Characterized orf19.5958 (CDR2)	Portion	Portion
INTRA	133	ORF		2	3	1148409	1150342	3	1050245	1052178	1934	1934	100097	Tandem	92.41	Characterized orf19.6000 (CDR1)	Characterized orf19.5958 (CDR2)	Portion	Portion
INTRA	131	ORF		3	3	1148727	1149629	3	850754	849852	903	903	299777	Inverted	82.5	Characterized orf19.6000 (CDR1)	Characterized orf19.918 (CDR11)	Portion	Portion
INTER	60	ORF		2	3	1153263	1154027	1	2433568	2432804	765	765	NA	NA	90.36	orf19.6002	orf19.2311	Single ORF	Single ORF
INTER	103	LTR		4	3	1157981	1158305	2	1459312	1459638	325	327	NA	NA	94.8									Known
INTER	103	LTR		4	3	1157982	1158308	4	319730	319389	327	342	NA	NA	90.64									Known
INTER	18	Intergenic		3	3	1219686	1219808	1	641929	641806	123	124	NA	NA	94.35
INTER	18	ORF		3	3	1219686	1219782	2	338272	338176	97	97	NA	NA	94.9	Intergenic Region	orf19.1492		Portion	Unannotated ORF (partial)
INTER	18	Intergenic		3	3	1219688	1219811	1	641930	641806	124	125	NA	NA	94.4
INTER	18	Intergenic		3	3	1219742	1219836	1	641930	641836	95	95	NA	NA	100
INTER	18	ORF		3	3	1219758	1219836	2	338272	338194	79	79	NA	NA	100	Intergenic Region	orf19.1492		Portion	Unannotated ORF (partial)
INTER	83	tRNA		5	3	1232593	1232675	R	515742	515824	83	83	NA	NA	98.8
INTER	83	tRNA		5	3	1232593	1232675	R	1233342	1233260	83	83	NA	NA	97.59
INTRA	83	tRNA		5	3	1232593	1232675	3	408042	408124	83	83	824633	Tandem	98.8	tRNA (AAC)	tRNA (AAC)
INTER	83	tRNA		5	3	1232598	1232675	2	496272	496195	78	78	NA	NA	100
INTER	83	tRNA		5	3	1232686	1232767	R	1233338	1233256	82	83	NA	NA	97.59
INTRA	129	ORF		2	3	1260329	1261605	3	758825	757555	1277	1271	504050	Inverted	83.98	orf19.6999	Uncharacterized orf19.355	Single ORF	Single ORF
INTER	67	LTR		6	3	1273023	1273239	1	2887192	2887408	217	217	NA	NA	97.7									Known
INTER	67	LTR		6	3	1273025	1273125	7	606600	606697	101	98	NA	NA	93.07					Unannotated LTR (partial)				Known
INTER	67	LTR		6	3	1273025	1273234	7	756020	756229	210	210	NA	NA	98.57									Known
INTER	67	LTR		6	3	1273092	1273237	R	1968080	1967937	146	144	NA	NA	96.58					Unannotated LTR (partial)				Known
INTER	67	LTR		6	3	1273150	1273232	R	1883938	1883856	83	83	NA	NA	97.59					Unannotated LTR (partial)				Known
INTRA	134	ORF		2	3	1300371	1301644	3	1308425	1307131	1274	1295	5487	Inverted	81.57	Characterized orf19.7362 (SKN1)	Characterized orf19.7363 (KRE6)	Portion	Portion
INTRA	134	ORF		2	3	1307131	1308425	3	1301644	1300371	1295	1274	8054	Inverted	81.57	Characterized orf19.7363 (KRE6)	Characterized orf19.7362 (SKN1)	Portion	Portion
INTER	135	ORF		2	3	1367663	1368199	5	743579	744115	537	537	NA	NA	93.85	orf19.7382	orf19.2651	Portion	Portion
INTER	77	Intergenic		2	3	1380268	1380546	2	222813	222533	279	281	NA	NA	89.08
INTRA	136	ORF		3	3	1402380	1404161	3	1457911	1456130	1782	1782	51969	Mirrored	99.83	Part of Uncharacterized orf19.7397, Uncharacterized orf19.7397.1, Large Intergenic Region	Uncharacterized orf19.7398, orf19.7424 (NSA2), Part of Uncharacterized orf19.7422	Multi ORF	Multi ORF
INTRA	136	ORF		3	3	1404221	1407250	3	1454881	1451848	3030	3034	44598	Inverted	99.7	Uncharacterized orf19.7397.3, orf19.7417 (TSA1)	Part ofUncharacterized orf19.7422, orf19.7421 (CYP5), Uncharacterized orf19.7420, orf19.7419 (HNT2), orf19.7398.1 (TSA1B)	Multi ORF	Multi ORF
INTER	137	ORF	ALS	MANY	3	1407002	1410559	6	787527	784020	3558	3508	NA	Tandem	91.39	Within orf19.7414 (ALS6)	ALS	Portion	Portion
INTRA	137	ORF	ALS	MANY	3	1409441	1410432	3	1449031	1448040	992	992	37608	Inverted	96.98	Within orf19.7414 (ALS6)	Within orf19.7400 (ALS7)	Portion	Portion
INTRA	137	ORF	ALS	MANY	3	1410285	1410451	3	1410393	1410559	167	167	58	Tandem	96.41	Within orf19.7414 (ALS6)	Within orf19.7400 (ALS7)	Portion	Portion
INTRA	137	ORF	ALS	MANY	3	1410393	1410580	3	1448187	1448000	188	188	37420	Inverted	86.7	Within orf19.7400 (ALS7)	Within orf19.7400 (ALS7)	Portion	Portion
INTRA	137	ORF	ALS	MANY	3	1410393	1410559	3	1410285	1410451	167	167	274	Tandem	96.41	Within orf19.7400 (ALS7)	Within orf19.7414 (ALS6)	Portion	Portion
INTRA	137	ORF	ALS	MANY	3	1410501	1410592	3	1448187	1448096	92	92	37504	Inverted	92.39	Within orf19.7414 (ALS6)	Within orf19.7400 (ALS7)	Portion	Portion
INTRA	137	ORF	ALS	MANY	3	1447997	1448079	3	1448105	1448187	83	83	26	Tandem	95.18	Within orf19.7400 (ALS7)	Within orf19.7400 (ALS7)	Portion	Portion
INTRA	137	ORF	ALS	MANY	3	1448000	1448187	3	1410580	1410393	188	188	37794	Inverted	86.7	Within orf19.7400 (ALS7)	Within orf19.7400 (ALS7)	Portion	Portion
INTER	137	ORF	ALS	MANY	3	1448018	1448187	6	784017	784186	170	170	NA	Tandem	85.29	ALS	ALS	Portion	Portion
INTRA	137	ORF	ALS	MANY	3	1448018	1449031	3	1410454	1409441	1014	1014	39590	Inverted	96.84	Within orf19.7400 (ALS7)	Within orf19.7414 (ALS6)	Portion	Portion
INTRA	137	ORF	ALS	MANY	3	1448096	1448187	3	1410592	1410501	92	92	37686	Inverted	92.39	Within orf19.7400 (ALS7)	Within orf19.7414 (ALS6)	Portion	Portion
INTRA	137	ORF	ALS	MANY	3	1448105	1448187	3	1447997	1448079	83	83	190	Tandem	95.18	Within orf19.7400 (ALS7)	Within orf19.7400 (ALS7)	Portion	Portion
INTER	137	ORF	ALS	MANY	3	1448187	1449031	6	784294	785090	845	797	NA	Tandem	84.73	ALS	ALS	Portion	Portion
INTRA	137	ORF	ALS	MANY	3	1449036	1449124	3	1449843	1449931	89	89	719	Tandem	97.75	Within orf19.7400 (ALS7)	Within orf19.7400 (ALS7)	Portion	Portion
INTRA	137	ORF	ALS	MANY	3	1449036	1449535	3	1449447	1449931	500	485	88	Tandem	92.6	Within orf19.7400 (ALS7)	Within orf19.7400 (ALS7)	Portion	Portion
INTRA	137	ORF	ALS	MANY	3	1449447	1449931	3	1449036	1449535	485	500	895	Tandem	92.6	Within orf19.7400 (ALS7)	Within orf19.7400 (ALS7)	Portion	Portion
INTRA	137	ORF	ALS	MANY	3	1449843	1449931	3	1449036	1449124	89	89	895	Tandem	97.75	Within orf19.7400 (ALS7)	Within orf19.7400 (ALS7)	Portion	Portion
INTRA	136	ORF		3	3	1451848	1454881	3	1407250	1404221	3034	3030	50660	Inverted	99.7	Part ofUncharacterized orf19.7422, orf19.7421 (CYP5), Uncharacterized orf19.7420, orf19.7419 (HNT2), orf19.7398.1 (TSA1B)	Uncharacterized or19.7397.3, orf19.7417 (TSA1)	Multi ORF	Multi ORF
INTRA	136	ORF		3	3	1456130	1457911	3	1404161	1402380	1782	1782	55531	Mirrored	99.83	Uncharacterized orf19.7398, orf19.7424 (NSA2), Part of Uncharacterized orf19.7422	Part of Uncharacterized orf19.7397, Uncharacterized orf19.7397.1, Large Intergenic Region	Multi ORF	Multi ORF			CNV
INTER	138	tRNA		2	3	1469609	1469723	R	1099077	1098961	115	117	NA	NA	95.73
INTER	139	Intergenic		2	3	1527118	1527337	5	544342	544121	220	222	NA	NA	86.94
INTER	63	tRNA		2	3	1560949	1561061	1	2727630	2727742	113	113	NA	NA	98.25
INTRA	121	tRNA		2	3	1595175	1595335	3	423764	423920	161	157	1171571	Tandem	92.59	tRNA (GUA)	tRNA (GUA)
INTER	140	ORF		2	3	1600958	1601892	R	634424	633493	935	932	NA	NA	83.69	orf19.6801	orf19.2834	Portion	Portion
INTER	28	ORF		3	3	1622364	1622778	1	882234	882648	415	415	NA	NA	89.64	orf19.6791	orf19.1061	Single ORF	Single ORF
INTER	28	ORF		3	3	1622368	1622778	R	1462309	1462719	411	411	NA	NA	90.27	orf19.6791	orf19.1853	Single ORF	Single ORF
INTER	141	LTR		3	3	1646961	1647492	R	2103919	2103388	532	532	NA	NA	98.12									Known
INTER	141	LTR		3	3	1646962	1647492	R	1611186	1611716	531	531	NA	NA	99.25									Known
INTER	142	ORF		4	3	1668699	1668883	4	1585858	1585674	185	185	NA	NA	91.89	orf19.6771	orf19.3087	Portion	Portion		LOH
INTER	142	ORF		4	3	1668927	1669111	4	1585858	1585674	185	185	NA	NA	90.27	orf19.6771	orf19.3087	Portion	Portion
INTER	142	ORF		4	3	1669155	1669382	4	1585858	1585631	228	228	NA	NA	89.04	orf19.6771	orf19.3807	Portion	Portion
INTRA	17	tRNA		5	3	1715749	1715938	3	592196	592007	190	190	1123931	Inverted	98.95	tRNA (GAA, UUC)	tRNA (GAA, UUC)				LOH
INTER	17	tRNA		5	3	1715753	1715940	2	810406	810591	188	186	NA	NA	96.28
INTER	17	tRNA		5	3	1715760	1715834	1	536661	536587	75	75	NA	NA	100
INTER	17	tRNA		5	3	1715760	1715938	2	790263	790439	179	177	NA	NA	97.77
INTER	91	tRNA		5	3	1715839	1715939	2	2168510	2168610	101	101	NA	NA	97.03
INTER	42	ORF		9	3	1787241	1787589	1	1293939	1293577	349	363	NA	NA	92.56				Single ORF	Unannotated TLO (partial)				Known
INTER	39	LTR		12	3	1787605	1787881	4	393722	393999	277	278	NA	NA	87.28					Unannotated LTR/TLO (partial)				Known
INTRA	39	LTR		12	3	1787605	1787880	3	521535	521812	276	278	1266345	Tandem	89.01	Rho-3b LTR, TLO8	Rho-3c LTR							Known
INTER	39	LTR		12	3	1787606	1787880	7	608221	608495	275	275	NA	NA	97.09									Known
INTER	39	LTR		12	3	1787606	1787885	1	1292441	1292161	280	281	NA	NA	92.25									Known
INTER	33	LTR		10	3	1788444	1788669	1	1021554	1021320	226	235	NA	NA	90.64					Unannotated LTR (partial)
INTER	33	LTR		10	4	537	764	1	1021320	1021557	228	238	NA	NA	90.34					Unannotated LTR
INTRA	143	ORF		2	4	19728	20113	4	73532	73147	386	386	53034	Inverted	89.92	Characterized orf19.5636 (RBT5)	Characterized orf19.5674 (PGA10)	Portion	Portion
INTRA	143	ORF		2	4	73147	73532	4	20113	19728	386	386	53804	Inverted	89.92	Characterized orf19.5674 (PGA10)	Characterized orf19.5636 (RBT5)	Portion	Portion
INTRA	144	ORF		2	4	83962	85706	4	119257	117512	1745	1746	31806	Inverted	98.34	Uncharacterized orf19.5678	Uncharacterized orf19.4173, Part of Uncharacterized orf19.4174	Single ORF	Multi ORF		LOH		INVERSION
INTRA	144	ORF		2	4	117512	119257	4	85706	83962	1746	1745	35295	Inverted	98.34	Uncharacterized orf19.4173, Part of Uncharacterized orf19.4174	Uncharacterized orf19.5678	Multi ORF	Single ORF
INTER	23	ORF		3	4	124482	124858	R	1161187	1161558	377	372	NA	NA	84.66	orf19.4170	orf19.555	Portion	Portion
INTER	23	ORF		3	4	124507	124801	1	824293	824587	295	295	NA	NA	84.85	orf19.4170	orf19.4463	Portion	Portion
INTER	118	tRNA		2	4	157035	157154	3	196047	196166	120	120	NA	NA	99.17
INTER	96	tRNA		6	4	164082	164170	R	1713673	1713758	89	86	NA	NA	95.51
INTER	96	tRNA		6	4	164088	164170	R	1882708	1882789	83	82	NA	NA	97.59
INTRA	96	tRNA		6	4	164089	164170	4	780294	780375	82	82	616124	Tandem	100	tRNA (GCC)	tRNA (GCC)
INTRA	96	tRNA		6	4	164089	164195	4	168308	168203	107	106	4008	Inverted	98.13	tRNA (GCC)	tRNA (GCC)
INTER	96	tRNA		6	4	164090	164277	2	1027315	1027130	188	186	NA	NA	89.36
INTRA	96	tRNA		6	4	168203	168308	4	164195	164089	106	107	4219	Inverted	98.13	tRNA (GCC)	tRNA (GCC)
INTER	96	tRNA		6	4	168212	168309	2	1027219	1027316	98	98	NA	NA	94.9
INTER	96	tRNA		6	4	168228	168304	R	1713758	1713682	77	77	NA	NA	100
INTER	96	tRNA		6	4	168228	168308	R	1882789	1882709	81	81	NA	NA	97.53
INTER	7	LTR		8	4	207558	207816	1	2516668	2516410	259	259	NA	NA	98.46									Known
INTER	7	LTR		8	4	207560	207814	5	306863	306609	255	255	NA	NA	98.82									Known
INTER	7	LTR		8	4	207560	207817	R	544165	543909	258	257	NA	NA	91.86									Known
INTER	7	LTR		8	4	207562	207702	3	296127	295987	141	141	NA	NA	99.29					Unannotated LTR (partial)				Known
INTER	7	LTR		8	4	207562	207809	2	969608	969358	248	251	NA	NA	94.82									Known
INTER	7	LTR		8	4	207562	207812	5	1171757	1172007	251	251	NA	NA	99.2									Known
INTER	7	LTR		8	4	207563	207810	1	248206	248452	248	247	NA	NA	94.35									Known
INTER	7	LTR		8	4	207575	207810	6	86515	86745	236	231	NA	NA	87.34									Known
INTER	7	LTR		8	4	207690	207811	3	295866	295746	122	121	NA	NA	94.26					Unannotated LTR (partial)				Known
INTRA	95	tRNA		6	4	227751	227871	4	781159	781039	121	121	553168	Inverted	95.04	tRNA (GUC)	tRNA (GUC)
INTER	95	tRNA		6	4	227761	227872	2	1024187	1024075	112	113	NA	NA	92.11
INTRA	95	tRNA		6	4	227789	227872	4	782726	782810	84	85	554854	Tandem	97.65	tRNA (GUC)	tRNA (GUC)
INTRA	95	tRNA		6	4	227789	227878	4	782571	782659	90	89	554693	Tandem	95.56	tRNA (GUC)	tRNA (GUC)
INTER	95	tRNA		6	4	227791	227872	R	2009120	2009038	82	83	NA	NA	96.39
INTER	12	tRNA		7	4	245691	245786	1	336128	336224	96	97	NA	NA	98.97
INTER	12	tRNA		7	4	245691	245787	R	1474112	1474208	97	97	NA	NA	96.91
INTRA	12	tRNA		7	4	245691	245787	4	1331729	1331632	97	98	1085845	Inverted	97.96	tRNA (UGA)	tRNA (UGA)
INTER	145	ORF		2	4	254508	254572	6	477988	477924	65	65	NA	NA	100	orf19.4662	orf19.3470	Portion	Portion
INTER	145	ORF		2	4	254509	254602	6	478017	477924	94	94	NA	NA	96.81	orf19.4662	orf19.3470	Portion	Portion
INTER	103	LTR		4	4	319389	319730	3	1158308	1157982	342	327	NA	NA	90.64									Known
INTER	103	LTR		4	4	319394	319726	2	1459637	1459318	333	320	NA	NA	87.72									Known
INTRA	103	LTR		4	4	319394	319729	4	1406119	1405793	336	327	1086064	Inverted	84.66	Sampi-4b LTR	Sampi-4a LTR							Known
INTER	90	LTR		6	4	357558	357933	7	256946	257326	376	381	NA	NA	96.33									Known
INTRA	90	LTR		6	4	357562	357928	4	1315845	1315472	367	374	957544	Inverted	95.19	Theta-4a LTR	Theta-4b LTR				LOH			Known
INTER	90	LTR		6	4	357562	357811	R	2258706	2258472	250	235	NA	NA	90.84					Unannotated LTR (partial)				Known
INTER	90	LTR		6	4	357562	357849	2	735248	734962	288	287	NA	NA	96.53									Known
INTER	90	LTR		6	4	357594	357852	R	2154581	2154832	259	252	NA	NA	91.54									Known
INTER	39	LTR		12	4	393721	393998	3	521534	521812	278	279	NA	NA	97.49					Unannotated LTR
INTER	39	LTR		12	4	393722	393984	1	3186970	3187232	263	263	NA	NA	87.69					Unannotated LTR
INTER	39	LTR		12	4	393722	393999	2	4886	4610	278	277	NA	NA	88.34					Unannotated LTR/TLO (partial)
INTER	39	LTR		12	4	393722	393999	3	14373	14097	278	277	NA	NA	87.99					Unannotated LTR/TLO (partial)
INTER	39	LTR		12	4	393722	393999	3	1787605	1787881	278	277	NA	NA	87.28					Unannotated LTR/TLO (partial)
INTER	39	LTR		12	4	393722	393999	5	2535	2259	278	277	NA	NA	88.34
INTER	39	LTR		12	4	393722	393999	6	6183	5907	278	277	NA	NA	87.99
INTER	39	Intergenic		12	4	393723	393999	1	1935739	1936016	277	278	NA	NA	97.84
INTER	39	LTR		12	4	393723	393998	1	1292441	1292165	276	277	NA	NA	90
INTER	93	LTR		4	4	464321	464455	2	2169233	2169099	135	135	NA	NA	92.59									Known
INTRA	146	ORF		2	4	531791	534363	4	555788	553212	2573	2577	18849	Inverted	97.28	Uncharacterized orf19.2743, Uncharacterized orf19.2742	Uncharacterized orf19.2730, Uncharacterized orf19.2731	Multi ORF	Multi ORF
INTER	45	Intergenic		2	4	550023	550228	1	1524064	1523859	206	206	NA	NA	89.86
INTRA	146	ORF		2	4	553212	555788	4	534363	531791	2577	2573	23997	Inverted	97.28	Uncharacterized orf19.2730, Uncharacterized orf19.2731	Uncharacterized orf19.2743, Uncharacterized orf19.2742	Multi ORF	Multi ORF
INTER	112	LTR		2	4	585849	586328	2	1929982	1929503	480	480	NA	NA	93.33									Known
INTRA	147	tRNA		2	4	627492	627576	4	1325140	1325055	85	86	697564	Tandem	97.67	tRNA (UGU)	tRNA (UGU)
INTRA	37	LTR		13	4	637130	637646	4	1179185	1178668	517	518	541022	Inverted	99.23	Zeta-4a LTR	Zeta-4a LTR							Known
INTER	37	LTR		13	4	637135	637213	2	2168638	2168716	79	79	NA	NA	100									Known
INTER	37	LTR		13	4	637136	637644	6	889168	888660	509	509	NA	NA	99.61									Known
INTER	37	LTR		13	4	637136	637644	R	1971125	1971633	509	509	NA	NA	99.41									Known
INTER	37	LTR		13	4	637137	637377	7	591367	591609	241	243	NA	NA	89.71					Unannotated LTR (partial)				Known
INTER	37	LTR		13	4	637137	637644	R	1097846	1098353	508	508	NA	NA	99.61									Known
INTER	37	LTR		13	4	637137	637644	R	626194	625687	508	508	NA	NA	99.41									Known
INTER	37	LTR		13	4	637137	637644	6	326018	325510	508	509	NA	NA	98.43									Known
INTER	37	LTR		13	4	637137	637644	3	822759	822260	508	500	NA	NA	91.55									Known
INTER	37	LTR		13	4	637137	637645	1	2590792	2591300	509	509	NA	NA	99.61									Known
INTER	37	LTR		13	4	637232	637638	1	1291288	1291696	407	409	NA	NA	94.62					Unannotated LTR (partial)				Known
INTER	37	LTR		13	4	637321	637638	2	2168718	2169035	318	318	NA	NA	95.28									Known
INTRA	148	ORF		2	4	671261	672786	4	704243	702718	1526	1526	29932	Inverted	95.74	Uncharacterized orf19.2671	Uncharacterized orf19.3362	Single ORF	Single ORF
INTER	72	LTR		5	4	673951	674332	1	3178400	3178782	382	383	NA	NA	99.22									Known
INTER	72	LTR		5	4	673952	674332	7	942511	942891	381	381	NA	NA	99.74									Known
INTER	72	Retrotransposon		5	4	673952	674170	R	544587	544370	219	218	NA	NA	94.06					Unannotated Retrotransposon (partial)				Known
INTRA	72	Retrotransposon		5	4	673952	674332	4	680467	680847	381	381	6135	Tandem	100	Retrotransposon Tca4-4	Retrotransposon Tca4-4							Known
INTER	72	LTR		5	4	680467	680847	7	942511	942891	381	381	NA	NA	99.74									Known
INTER	72	LTR		5	4	680467	680849	1	3178401	3178784	383	384	NA	NA	99.22									Known
INTER	72	Retrotransposon		5	4	680467	680685	R	544587	544370	219	218	NA	NA	94.06					Unannotated Retrotransposon (partial)				Known
INTRA	72	Retrotransposon		5	4	680467	680847	4	673952	674332	381	381	6895	Tandem	100	Retrotransposon Tca4-4	Retrotransposon Tca4-4							Known
INTRA	148	ORF		2	4	702718	704243	4	672786	671261	1526	1526	32982	Inverted	95.74	Uncharacterized orf19.3362	Uncharacterized orf19.2671	Single ORF	Single ORF
INTER	102	Intergenic		3	4	743883	744233	5	968837	968483	351	355	NA	NA	88.45
INTER	102	Intergenic		3	4	743886	744233	2	1430579	1430927	348	349	NA	NA	89.71
INTRA	149	ORF		2	4	745157	745452	4	764962	764662	296	301	19210	Inverted	82.57	Characterized orf19.1327 (RBT1)	Characterized orf19.1321 (HWP1)	Portion	Portion
INTER	76	Intergenic		5	4	761913	762168	7	185536	185793	256	258	NA	NA	88.42
INTER	76	Intergenic		5	4	761948	762168	2	178056	177824	221	233	NA	NA	85.41
INTRA	149	ORF		2	4	764662	764962	4	745452	745157	301	296	19805	Inverted	82.57	Characterized orf19.1321 (HWP1)	Characterized orf19.1327 (RBT1)	Portion	Portion
INTER	97	tRNA		4	4	772477	772589	2	1077449	1077561	113	113	NA	NA	91.23
INTRA	97	tRNA		4	4	772498	772584	4	1006771	1006856	87	86	234272	Inverted	94.25	tRNA (UUG)	tRNA (UUG)
INTER	96	tRNA		6	4	780294	780375	R	1882709	1882789	82	81	NA	NA	97.56
INTRA	96	tRNA		6	4	780294	780375	4	164089	164170	82	82	616286	Tandem	100	tRNA (GCC)	tRNA (GCC)
INTER	96	tRNA		6	4	780295	780375	2	1027315	1027235	81	81	NA	NA	100
INTER	96	tRNA		6	4	780297	780376	R	1713681	1713759	80	79	NA	NA	98.75
INTRA	95	tRNA		6	4	781034	781119	4	782813	782728	86	86	1609	Inverted	97.7	tRNA (GUC)	tRNA (GUC)
INTER	95	tRNA		6	4	781039	781119	R	2009038	2009120	81	83	NA	NA	97.59
INTER	95	tRNA		6	4	781039	781149	2	1024076	1024187	111	112	NA	NA	93.75
INTRA	95	tRNA		6	4	781039	781119	4	782652	782573	81	80	1454	Inverted	98.77	tRNA (GUC)	tRNA (GUC)
INTRA	95	tRNA		6	4	781039	781159	4	227871	227751	121	121	553408	Inverted	95.04	tRNA (GUC)	tRNA (GUC)
INTRA	95	tRNA		6	4	782570	782653	4	782725	782810	84	86	72	Tandem	97.67	tRNA (GUC)	tRNA (GUC)
INTRA	95	tRNA		6	4	782571	782659	4	227789	227878	89	90	554870	Tandem	95.56	tRNA (GUC)	tRNA (GUC)
INTER	95	tRNA		6	4	782573	782653	2	1024156	1024075	81	82	NA	NA	98.78
INTER	95	tRNA		6	4	782573	782653	R	2009120	2009039	81	82	NA	NA	97.56
INTRA	95	tRNA		6	4	782573	782652	4	781119	781039	80	81	1613	Inverted	98.77	tRNA (GUC)	tRNA (GUC)
INTER	95	tRNA		6	4	782724	782811	R	2009125	2009036	88	90	NA	NA	96.67
INTRA	95	tRNA		6	4	782725	782810	4	782570	782653	86	84	240	Tandem	97.67	tRNA (GUC)	tRNA (GUC)
INTRA	95	tRNA		6	4	782726	782810	4	227789	227872	85	84	555021	Tandem	97.65	tRNA (GUC)	tRNA (GUC)
INTER	95	tRNA		6	4	782728	782810	2	1024156	1024075	83	82	NA	NA	98.8
INTRA	95	tRNA		6	4	782728	782813	4	781119	781034	86	86	1779	Inverted	97.7	tRNA (GUC)	tRNA (GUC)
INTER	150	ORF		2	4	833086	834383	7	615453	616750	1298	1298	NA	NA	81.61	orf19.1596	orf19.5177	Portion	Portion
INTRA	151	Intergenic		2	4	991719	992242	4	995876	995353	524	524	3111	Inverted	99.81						LOH	CNV	INVERSION
INTRA	151	Intergenic		2	4	995353	995876	4	992242	991719	524	524	4157	Inverted	99.81
INTRA	152	ORF		2	4	996045	997874	4	1488782	1486953	1830	1830	489079	Inverted	99.89	Uncharacterized orf19.3820	Uncharacterized orf19.2866	Single ORF	Single ORF
INTER	97	tRNA		4	4	1006771	1006856	2	1077471	1077556	86	86	NA	NA	94.19
INTRA	97	tRNA		4	4	1006771	1006856	4	772498	772584	86	87	234272	Inverted	94.25	tRNA (UUG)	tRNA (UUG)
INTER	97	tRNA		4	4	1006859	1006949	2	1077465	1077556	91	92	NA	NA	91.58
INTER	98	tRNA		5	4	1015498	1015627	2	1112411	1112279	130	133	NA	NA	89.55
INTER	98	tRNA		5	4	1015524	1015623	2	1620315	1620415	100	101	NA	NA	97.03
INTER	98	tRNA		5	4	1015524	1015624	R	1813280	1813380	101	101	NA	NA	93.14
INTER	98	tRNA		5	4	1015528	1015623	2	1321523	1321619	96	97	NA	NA	95.88
INTRA	37	LTR		13	4	1178668	1179185	4	637646	637130	518	517	542055	Inverted	99.23	Zeta-4a LTR	Zeta-4a LTR							Known
INTER	37	LTR		13	4	1178669	1179179	1	2591300	2590791	511	510	NA	NA	99.61									Known
INTER	37	LTR		13	4	1178670	1179178	6	888660	889167	509	508	NA	NA	99.61									Known
INTER	37	LTR		13	4	1178670	1179178	R	1098353	1097846	509	508	NA	NA	99.61									Known
INTER	37	LTR		13	4	1178670	1179178	R	625687	626194	509	508	NA	NA	99.41									Known
INTER	37	LTR		13	4	1178670	1179178	R	1971633	1971126	509	508	NA	NA	99.02									Known
INTER	37	LTR		13	4	1178670	1179178	6	325510	326018	509	509	NA	NA	98.43									Known
INTER	37	LTR		13	4	1178670	1179178	3	822260	822759	509	500	NA	NA	91.18									Known
INTER	37	LTR		13	4	1178676	1179083	1	1291696	1291288	408	409	NA	NA	94.38					Unannotated LTR (partial)				Known
INTER	37	LTR		13	4	1178676	1178994	2	2169035	2168718	319	318	NA	NA	94.67									Known
INTER	37	LTR		13	4	1178938	1179178	7	591609	591367	241	243	NA	NA	89.71					Unannotated LTR (partial)				Known
INTER	37	LTR		13	4	1179102	1179178	2	2168716	2168640	77	77	NA	NA	100									Known
INTER	10	LTR		6	4	1193922	1194130	2	1302277	1302069	209	209	NA	NA	97.61									Known
INTER	10	LTR		6	4	1193923	1194119	2	216684	216878	197	195	NA	NA	97.46									Known
INTER	10	LTR		6	4	1193924	1194119	1	280126	280321	196	196	NA	NA	99.49									Known
INTRA	153	ORF		2	4	1257258	1260018	4	1298827	1296034	2761	2794	36016	Inverted	98.25	Part of orf19.1255 (ZCF5)	Part of Uncharacterized orf19.1273, Uncharacterized orf19.1274	Portion	Multi ORF
INTER	43	Intergenic		14	4	1260538	1260869	1	1294217	1293899	332	319	NA	NA	85.59									Known
INTER	43	LTR		14	4	1260538	1260998	R	210585	211055	461	471	NA	NA	87.5					Unannotated ORF/LTR (partial)				Known
INTER	43	LTR		14	4	1260539	1261012	2	654945	655428	474	484	NA	NA	87.01					Unannotated LTR (partial)				Known
INTER	43	LTR		14	4	1260539	1260999	2	1012417	1012887	461	471	NA	NA	87.5					Unannotated LTR (partial)				Known
INTER	43	LTR		14	4	1260539	1260998	5	501179	500710	460	470	NA	NA	87.47					Unannotated LTR (partial)				Known
INTER	43	LTR		14	4	1260539	1260998	R	215262	215731	460	470	NA	NA	87.47					Unannotated ORF/LTR (partial)				Known
INTER	43	Intergenic		14	4	1260779	1261001	2	148011	148244	223	234	NA	NA	88.89									Known
INTRA	154	Intergenic		2	4	1261179	1261681	4	1299777	1299271	503	507	37590	Mirrored	80.82
INTER	69	LTR		5	4	1262686	1262877	1	3099034	3099226	192	193	NA	NA	93.81
INTER	69	LTR		5	4	1262687	1262877	6	1032627	1032438	191	190	NA	NA	94.24
INTER	69	LTR		5	4	1262687	1262880	5	167376	167572	194	197	NA	NA	88.89
INTER	69	LTR		5	4	1262702	1262877	R	2036694	2036872	176	179	NA	NA	90.5					Unannotated ORF/LTR (partial)
INTRA	155	ORF		2	4	1272357	1273741	4	1277083	1278467	1385	1385	3342	Tandem	80.16	Characterized orf19.1264 (CFL2)	Characterized orf19.1264 (CFL2)	Portion	Portion
INTRA	155	ORF		2	4	1277083	1278467	4	1272357	1273741	1385	1385	6110	Tandem	80.16	Characterized orf19.1264 (CFL2)	Characterized orf19.1264 (CFL2)	Portion	Portion
INTRA	153	ORF		2	4	1296034	1296785	4	1260018	1259267	752	752	37518	Inverted	99.34	Part of Uncharacterized orf19.1273, Uncharacterized orf19.1274	Part of orf19.1255 (ZCF5)	Multi ORF	Portion				INVERSION
INTRA	153	ORF		2	4	1296786	1298827	4	1259302	1257258	2042	2045	41569	Inverted	99.61	Part of Uncharacterized orf19.1273, Uncharacterized orf19.1274	Part of orf19.1255 (ZCF5)	Multi ORF	Portion
INTER	156	Intergenic		3	4	1298980	1299096	5	494360	494476	117	117	NA	NA	95.73
INTER	156	Intergenic		3	4	1298980	1299097	5	544104	544223	118	120	NA	NA	92.5
INTRA	154	Intergenic		2	4	1299271	1299777	4	1261681	1261179	507	503	38598	Mirrored	80.82
INTER	90	LTR		6	4	1315472	1315845	7	257321	256950	374	372	NA	NA	96.79									Known
INTRA	90	LTR		6	4	1315472	1315845	4	357928	357562	374	367	958283	Inverted	95.19	Theta-4b LTR	Theta-4a LTR							Known
INTER	90	LTR		6	4	1315548	1315813	R	2154832	2154581	266	252	NA	NA	90.64									Known
INTER	90	LTR		6	4	1315551	1315847	2	734962	735250	297	289	NA	NA	93.6									Known
INTER	90	LTR		6	4	1315584	1315847	R	2258467	2258708	264	242	NA	NA	88.68					Unannotated LTR (partial)				Known
INTRA	147	tRNA		2	4	1325055	1325140	4	627576	627492	86	85	697564	Tandem	97.67	tRNA (UGU)	tRNA (UGU)
INTRA	12	tRNA		7	4	1331632	1331729	4	245787	245691	98	97	1086038	Inverted	97.96	tRNA (UGA)	tRNA (UGA)
INTER	12	tRNA		7	4	1331634	1331730	1	336222	336126	97	97	NA	NA	98.97
INTRA	103	LTR		4	4	1405793	1406119	4	319729	319394	327	336	1086725	Inverted	84.66	Sampi-4a LTR	Sampi-4b LTR							Known
INTRA	152	ORF		2	4	1486953	1488782	4	997874	996045	1830	1830	492737	Inverted	99.89	Uncharacterized orf19.2866	Uncharacterized orf19.3820	Single ORF	Single ORF
INTRA	157	Intergenic		2	4	1503503	1503581	4	1503578	1503656	79	79	3	Tandem	100
INTRA	157	Intergenic		2	4	1503578	1503656	4	1503503	1503581	79	79	153	Tandem	100
INTER	76	Intergenic		5	4	1541197	1541430	3	296350	296584	234	235	NA	NA	91.1
INTER	142	ORF		4	4	1585631	1585824	3	1669382	1669189	194	194	NA	NA	90.21	orf19.3087	orf19.6771	Portion	Portion
INTER	142	ORF		4	4	1585631	1585824	3	1669154	1668961	194	194	NA	NA	89.69	orf19.3087	orf19.6771	Portion	Portion
INTER	142	ORF		4	4	1585631	1585858	3	1668926	1668699	228	228	NA	NA	89.91	orf19.3087	orf19.6771	Portion	Portion
INTER	42	ORF		9	4	1597264	1597674	1	1293939	1293518	411	422	NA	NA	93.84			Portion	Single ORF
INTER	33	LTR		10	4	1598215	1598433	1	1021557	1021320	219	238	NA	NA	85.29					Unannotated LTR (partial)
INTER	33	LTR		10	5	1483	1699	1	1021332	1021557	217	226	NA	NA	88.5					Unannotated LTR (partial)
INTER	39	LTR		12	5	2255	2534	1	1292161	1292441	280	281	NA	NA	93.31									Known
INTER	39	LTR		12	5	2259	2535	4	393999	393722	277	278	NA	NA	88.34					Unannotated LTR/TLO (partial)				Known
INTER	39	LTR		12	5	2260	2534	7	608495	608221	275	275	NA	NA	98.18									Known
INTER	39	LTR		12	5	2260	2535	3	521812	521535	276	278	NA	NA	90.07									Known
INTER	42	ORF		9	5	2534	2911	1	1293554	1293939	378	386	NA	NA	92.76				Single ORF	Unannotated TLO (partial)
INTER	69	LTR		5	5	167376	167569	6	1032627	1032438	194	190	NA	NA	92.78									Known
INTER	69	LTR		5	5	167376	167569	1	3099035	3099226	194	192	NA	NA	88.78									Known
INTER	69	LTR		5	5	167376	167572	4	1262687	1262880	197	194	NA	NA	88.89									Known
INTER	158	ORF		2	5	171879	172149	7	720582	720312	271	271	NA	NA	85.4	orf19.575	Intergenic Region	Portion		Unannotated ORF (partial)
INTRA	159	ORF		2	5	173152	173386	5	173398	173632	235	235	12	Tandem	89.79	Characterized orf19.575 (HYR3)	Characterized orf19.575 (HYR3)	Portion	Portion
INTRA	160	ORF		2	5	173152	173263	5	173521	173632	112	112	258	Tandem	95.54	Characterized orf19.575 (HYR3)	Characterized orf19.575 (HYR3)	Portion	Portion
INTRA	159	ORF		2	5	173398	173632	5	173152	173386	235	235	480	Tandem	89.79	Characterized orf19.575 (HYR3)	Characterized orf19.575 (HYR3)	Portion	Portion
INTRA	160	ORF		2	5	173521	173632	5	173152	173263	112	112	480	Tandem	95.54	Characterized orf19.575 (HYR3)	Characterized orf19.575 (HYR3)	Portion	Portion
INTER	13	LTR		6	5	192734	192994	1	403880	404138	261	259	NA	NA	86.59					Unannotated LTR (partial)
INTER	13	LTR		6	5	192734	192994	2	1887307	1887049	261	259	NA	NA	86.59					Unannotated LTR (partial)
INTER	13	LTR		6	5	192734	192994	R	961845	961587	261	259	NA	NA	86.59					Unannotated LTR (partial)
INTER	13	LTR		6	5	192734	192994	R	2244066	2243807	261	260	NA	NA	86.64					Unannotated LTR (partial)
INTER	13	LTR		6	5	192737	193013	R	426962	427237	277	276	NA	NA	84.48					Unannotated LTR (partial)
INTER	123	tRNA		7	5	217452	217555	3	703171	703275	104	105	NA	NA	93.33
INTRA	123	tRNA		7	5	217460	217557	5	769639	769736	98	98	552082	Tandem	95.92	tRNA (UUC)	tRNA (UUC)
INTER	123	tRNA		7	5	217461	217557	R	1881054	1881150	97	97	NA	NA	96.91
INTER	123	tRNA		7	5	217462	217562	3	447714	447613	101	102	NA	NA	97.06
INTER	123	tRNA		7	5	217462	217567	3	835892	835784	106	109	NA	NA	88.99
INTRA	123	tRNA		7	5	217462	217555	5	217569	217662	94	94	14	Tandem	95.74	tRNA (UUC)	tRNA (UUC)
INTER	123	tRNA		7	5	217566	217677	3	703179	703291	112	113	NA	NA	97.35
INTER	123	tRNA		7	5	217567	217678	3	447716	447607	112	110	NA	NA	94.64
INTER	123	tRNA		7	5	217569	217673	R	1881055	1881158	105	104	NA	NA	97.14
INTER	123	tRNA		7	5	217569	217673	3	835892	835785	105	108	NA	NA	91.82
INTRA	123	tRNA		7	5	217569	217662	5	217462	217555	94	94	200	Tandem	95.74	tRNA (UUC)	tRNA (UUC)
INTRA	123	tRNA		7	5	217569	217681	5	769641	769753	113	113	551960	Tandem	95.61	tRNA (UUC)	tRNA (UUC)
INTER	7	LTR		8	5	306606	306733	3	295740	295866	128	127	NA	NA	94.53					Unannotated LTR (partial)				Known
INTER	7	LTR		8	5	306609	306863	4	207814	207560	255	255	NA	NA	98.82									Known
INTER	7	LTR		8	5	306611	306864	R	543914	544166	254	253	NA	NA	92.52									Known
INTER	7	LTR		8	5	306612	306848	6	86746	86515	237	232	NA	NA	87.82					Unannotated LTR (partial)				Known
INTER	7	LTR		8	5	306612	306860	1	248453	248206	249	248	NA	NA	95.18									Known
INTER	7	LTR		8	5	306613	306861	1	2516416	2516664	249	249	NA	NA	100									Known
INTRA	7	LTR		8	5	306613	306861	5	1172005	1171757	249	249	864896	Inverted	100	Iota-5a LTR	Iota-5b LTR							Known
INTER	7	LTR		8	5	306614	306861	2	969358	969608	248	251	NA	NA	95.22									Known
INTER	7	LTR		8	5	306721	306861	3	295987	296127	141	141	NA	NA	99.29					Unannotated LTR (partial)				Known
INTER	6	LTR		10	5	360288	360758	R	1924697	1924226	471	472	NA	NA	95.55									Known
INTER	6	LTR		10	5	360288	360759	R	2182312	2182783	472	472	NA	NA	95.97									Known
INTER	6	LTR		10	5	360289	360658	1	363873	363503	370	371	NA	NA	94.88					Unannotated LTR (partial)				Known
INTER	6	LTR		10	5	360289	360507	7	927044	927262	219	219	NA	NA	94.52									Known
INTER	6	LTR		10	5	360289	360758	7	521438	521907	470	470	NA	NA	95.96									Known
INTER	6	LTR		10	5	360289	360758	1	222184	222653	470	470	NA	NA	95.32									Known
INTER	6	LTR		10	5	360289	360760	7	528463	528934	472	472	NA	NA	95.97									Known
INTER	6	LTR		10	5	360550	360758	7	796465	796673	209	209	NA	NA	92.82					Unannotated LTR (partial)				Known
INTRA	161	ORF		2	5	466326	468529	5	473964	471762	2204	2203	3233	Inverted	99.32	orf19.3160 (HSP12), Uncharacterized orf19.3159.4	Uncharacterized orf19.4216, Large Intergenic Region	Multi ORF	Single ORF		LOH	CNV
INTRA	161	ORF		2	5	471762	473964	5	468529	466326	2203	2204	7638	Inverted	99.32	Uncharacterized orf19.4216, Large Intergenic Region	orf19.3160 (HSP12), Uncharacterized orf19.3159.4	Single ORF	Multi ORF			CNV
INTRA	156	Intergenic		3	5	494356	494554	5	544100	544300	199	201	49546	Tandem	92.54
INTER	156	Intergenic		3	5	494360	494476	4	1298980	1299096	117	117	NA	NA	95.73
INTER	43	LTR		14	5	500706	501183	7	674453	674930	478	478	NA	NA	93.53						LOH			Known
INTER	43	LTR		14	5	500709	501179	R	211056	210586	471	471	NA	NA	99.15									Known
INTER	43	LTR		14	5	500709	501179	7	779146	779616	471	471	NA	NA	92.58									Known
INTER	43	LTR		14	5	500709	501180	R	215732	215261	472	472	NA	NA	99.15									Known
INTER	43	LTR		14	5	500710	501179	4	1260998	1260539	470	460	NA	NA	87.47					Unannotated LTR				Known
INTER	43	LTR		14	5	500710	501159	R	2243670	2243231	450	440	NA	NA	84.89					Unannotated LTR				Known
INTER	43	LTR		14	5	500710	500940	2	148241	148011	231	231	NA	NA	95.67					Unannotated LTR (partial)				Known
INTER	43	LTR		14	5	500710	501179	2	1012886	1012417	470	470	NA	NA	99.57									Known
INTER	43	LTR		14	5	500710	501179	2	655414	654945	470	470	NA	NA	99.15									Known
INTER	43	LTR		14	5	500710	501179	R	1968792	1968323	470	470	NA	NA	93.42									Known
INTER	43	LTR		14	5	500710	501179	R	1474282	1474751	470	470	NA	NA	92.98									Known
INTER	43	LTR		14	5	500849	501179	1	1293899	1294216	331	318	NA	NA	87.01					Unannotated LTR (partial)				Known
INTER	43	LTR		14	5	500849	501183	7	942020	941688	335	333	NA	NA	93.13					Unannotated LTR (partial)				Known
INTER	162	ORF		2	5	515381	515996	R	5962	5347	616	616	NA	NA	91.88	orf19.4241	orf19.7545	Single ORF	Portion
INTER	9	LTR		3	5	534806	535130	1	277407	277083	325	325	NA	NA	99.69									Known
INTER	9	LTR		3	5	534812	535122	3	359942	359632	311	311	NA	NA	98.07									Known
INTRA	156	Intergenic		3	5	544100	544300	5	494356	494554	201	199	49944	Tandem	92.54
INTER	156	Intergenic		3	5	544104	544223	4	1298980	1299097	120	118	NA	NA	92.5
INTER	139	Intergenic		2	5	544121	544342	3	1527337	1527118	222	220	NA	NA	86.94
INTER	163	ORF		2	5	638099	638442	R	2032338	2032682	344	345	NA	NA	90.86	snR10c	orf19.6608	Portion	Portion	Unannotated ORF (partial)
INTER	135	ORF		2	5	743579	744115	3	1367663	1368199	537	537	NA	NA	93.85	orf19.2651	orf19.7382	Portion	Portion
INTRA	123	tRNA		7	5	769639	769736	5	217460	217557	98	98	552276	Tandem	95.92	tRNA (UUC)	tRNA (UUC)
INTER	123	tRNA		7	5	769640	769745	R	1881054	1881158	106	105	NA	NA	97.17
INTER	123	tRNA		7	5	769641	769736	3	835892	835794	96	99	NA	NA	92.08
INTER	123	tRNA		7	5	769641	769748	3	447714	447608	108	107	NA	NA	96.3
INTER	123	tRNA		7	5	769641	769748	3	703182	703291	108	110	NA	NA	94.55
INTRA	123	tRNA		7	5	769641	769753	5	217569	217681	113	113	552184	Tandem	95.61	tRNA (UUC)	tRNA (UUC)
INTRA	164	ORF		2	5	809246	810313	5	822398	821330	1068	1069	11017	Inverted	99.53	Uncharacterized orf19.6676	Uncharacterized orf19.1124.2	Single ORF	Single ORF
INTER	165	LTR		2	5	812481	812688	R	544370	544163	208	208	NA	NA	94.71					Unannotated LTR	LOH			Known
INTRA	164	ORF		2	5	821330	822398	5	810313	809246	1069	1068	13152	Inverted	99.53	Uncharacterized orf19.1124.2	Uncharacterized orf19.6676	Single ORF	Single ORF
INTER	116	ORF		3	5	833951	835097	2	2066006	2064857	1147	1150	NA	NA	90.26	orf19.1117	orf19.1774	Single ORF	Single ORF
INTER	116	ORF		3	5	833965	835107	R	1117090	1118234	1143	1145	NA	NA	87.07	orf19.1117	orf19.638	Single ORF	Single ORF
INTER	105	ORF		2	5	966849	968181	2	1658517	1657186	1333	1332	NA	NA	83.11	orf19.3924	orf19.2168	Single ORF	Single ORF
INTER	102	Intergenic		3	5	968480	968833	2	1430930	1430580	354	351	NA	NA	86.48
INTER	102	Intergenic		3	5	968483	968837	4	744233	743883	355	351	NA	NA	88.45
INTER	5	tRNA		6	5	1035136	1035224	2	1621652	1621740	89	89	NA	NA	97.75
INTER	5	tRNA		6	5	1035136	1035224	1	204987	205074	89	88	NA	NA	96.63
INTER	5	tRNA		6	5	1035136	1035225	1	3061199	3061110	90	90	NA	NA	96.67
INTER	5	tRNA		6	5	1035138	1035224	3	845754	845841	87	88	NA	NA	97.73
INTER	5	tRNA		6	5	1035141	1035225	1	354223	354306	85	84	NA	NA	97.65
INTER	51	ORF		2	5	1107950	1108978	1	1830327	1829299	1029	1029	NA	NA	84.94	orf19.3997	orf19.5113	Single ORF	Single ORF
INTER	7	LTR		8	5	1171754	1172010	1	2516667	2516411	257	257	NA	NA	100									Known
INTER	7	LTR		8	5	1171756	1171897	3	296128	295987	142	142	NA	NA	99.3					Unannotated LTR (partial)				Known
INTER	7	LTR		8	5	1171756	1172004	2	969609	969358	249	252	NA	NA	95.24									Known
INTER	7	LTR		8	5	1171757	1172005	R	544163	543916	249	248	NA	NA	92.37									Known
INTRA	7	LTR		8	5	1171757	1172005	5	306861	306613	249	249	865392	Inverted	100	Iota-5b LTR	Iota-5a LTR							Known
INTER	7	LTR		8	5	1171757	1172007	4	207562	207812	251	251	NA	NA	99.2									Known
INTER	7	LTR		8	5	1171758	1172005	1	248206	248452	248	247	NA	NA	95.16									Known
INTER	7	LTR		8	5	1171770	1172005	6	86515	86745	236	231	NA	NA	87.6					Unannotated LTR (partial)				Known
INTER	7	LTR		8	5	1171885	1172006	3	295866	295746	122	121	NA	NA	95.9					Unannotated LTR (partial)				Known
INTER	33	LTR		10	5	1183146	1183373	1	1021557	1021320	228	238	NA	NA	92.44					Unannotated LTR (partial)
INTRA	33	Intergenic		10	5	1183149	1183373	5	1190925	1190698	225	228	7325	Inverted	96.05
INTRA	33	Intergenic		10	5	1183373	1184065	5	1190441	1189755	693	687	5690	Inverted	89.4
INTRA	33	Intergenic		10	5	1189755	1190441	5	1184065	1183373	687	693	7068	Inverted	89.4
INTRA	33	Intergenic		10	5	1190698	1190925	5	1183373	1183149	228	225	7776	Inverted	96.05
INTER	33	LTR		10	5	1190698	1190925	1	1021320	1021554	228	235	NA	NA	89.87					Unannotated LTR (partial)
INTRA	166	ORF		2	6	3076	3380	6	1030637	1030302	305	336	1026922	Mirrored	87.8	Intergenic Region	Uncharacterized orf19.2163		Portion	Unannotated ORF (partial)
INTER	39	LTR		12	6	5903	6182	1	1292161	1292441	280	281	NA	NA	92.96									Known
INTER	39	LTR		12	6	5907	6183	4	393999	393722	277	278	NA	NA	87.99					Unannotated LTR/TLO (partial)				Known
INTER	39	LTR		12	6	5908	6182	7	608495	608221	275	275	NA	NA	97.82									Known
INTER	39	LTR		12	6	5908	6183	3	521812	521535	276	278	NA	NA	89.72									Known
INTER	42	ORF		9	6	6182	6562	1	1293554	1293939	381	386	NA	NA	95.6			Portion	Single ORF
INTRA	75	tRNA		8	6	6932	7065	6	992932	993072	134	141	985867	Tandem	91.49	tRNA (CAA)	tRNA (CAA)
INTER	75	tRNA		8	6	6934	7054	R	1842027	1841903	121	125	NA	NA	88.8
INTER	167	ORF		2	6	7823	8424	R	11025	11626	602	602	NA	NA	98.34	orf19.6336	orf19.7539.1	Portion	Portion
INTRA	168	ORF		2	6	76788	77650	6	87560	88428	863	869	9910	Tandem	86.77	Characterized orf19.4215 (FET34)	Characterized orf19.4211 (FET3)	Portion	Portion
INTRA	168	ORF		2	6	87560	88428	6	76788	77650	869	863	11640	Tandem	86.77	Characterized orf19.4211 (FET3)	Characterized orf19.4215 (FET34)	Portion	Portion		LOH
INTRA	169	ORF		2	6	160388	161336	6	192331	191383	949	949	30047	Inverted	81.11	Characterized orf19.84 (CAN3)	Characterized orf19.97 (CAN1)	Portion	Portion
INTER	170	Intergenic		2	6	173994	174223	R	4579	4350	230	230	NA	NA	94.35
INTRA	171	ORF		2	6	191279	192770	6	207591	206100	1492	1492	13330	Inverted	83.08	Characterized orf19.97 (CAN1)	Characterized orf19.111 (CAN2)	Portion	Portion
INTRA	169	ORF		2	6	191383	192331	6	161336	160388	949	949	31943	Inverted	81.11	Characterized orf19.97 (CAN1)	Characterized orf19.84 (CAN3)	Portion	Portion
INTRA	172	ORF		2	6	192969	194240	6	201647	200373	1272	1275	6133	Inverted	89.89	Characterized orf19.99 (HAL21)	Characterized orf19.105 (HAL22)	Single ORF	Single ORF
INTRA	172	ORF		2	6	200373	201647	6	194240	192969	1275	1272	8678	Inverted	89.89	Characterized orf19.105 (HAL22)	Characterized orf19.99 (HAL21)	Single ORF	Single ORF
INTRA	171	ORF		2	6	206100	207591	6	192770	191279	1492	1492	16312	Inverted	83.08	Characterized orf19.111 (CAN2)	Characterized orf19.97 (CAN1)	Portion	Portion
INTER	10	LTR		6	6	211109	211295	2	216880	216698	187	183	NA	NA	90.91					Unannotated LTR (partial)
INTER	10	Intergenic		6	6	211110	211311	2	451282	451071	202	212	NA	NA	86.85
INTRA	173	ORF		2	6	229474	230736	6	306051	304796	1263	1256	74060	Inverted	86.65	Characterized orf19.125 (EBP1)	Characterized orf19.3433 (OYE23)	Single ORF	Single ORF
INTRA	174	ORF		3	6	229796	230412	6	281499	282115	617	617	51087	Tandem	85.14	Characterized orf19.125 (EBP1)	Characterized orf19.3443 (OYE2)	Portion	Portion		LOH
INTRA	53	Retrotransposon		3	6	240364	240871	6	244917	245424	508	508	4046	Tandem	100	Retrotransposon Tca13-6	Retrotransposon Tca13-6							Known
INTER	53	LTR		3	6	240365	240871	1	1902967	1902461	507	507	NA	NA	99.01									Known
INTRA	53	Retrotransposon		3	6	244917	245424	6	240364	240871	508	508	5060	Tandem	100	Retrotransposon Tca13-6	Retrotransposon Tca13-6							Known
INTER	53	LTR		3	6	244918	245424	1	1902967	1902461	507	507	NA	NA	99.01									Known
INTRA	174	ORF		3	6	281499	282115	6	229796	230412	617	617	52319	Tandem	85.14	Characterized orf19.3443 (OYE2)	Characterized orf19.125 (EBP1)	Portion	Portion
INTRA	174	ORF		3	6	281622	282115	6	305606	305116	494	491	23001	Inverted	87.45	Characterized orf19.3443 (OYE2)	Characterized orf19.3433 (OYE23)	Portion	Portion
INTRA	173	ORF		2	6	304796	306051	6	230736	229474	1256	1263	76577	Inverted	86.65	Characterized orf19.3433 (OYE23)	Characterized orf19.125 (EBP1)	Single ORF	Single ORF
INTRA	174	ORF		3	6	305116	305606	6	282115	281622	491	494	23984	Inverted	87.45	Characterized orf19.3433 (OYE23)	Characterized orf19.3443 (OYE2)	Portion	Portion
INTER	37	LTR		13	6	325508	325923	1	1291704	1291288	416	417	NA	NA	93.76					Unannotated LTR (partial)				Known
INTER	37	LTR		13	6	325508	325842	2	2169043	2168710	335	334	NA	NA	93.13									Known
INTER	37	LTR		13	6	325509	326018	R	625686	626194	510	509	NA	NA	98.04									Known
INTER	37	LTR		13	6	325509	326018	3	822259	822759	510	501	NA	NA	90.41									Known
INTER	37	LTR		13	6	325510	326018	4	637644	637137	509	508	NA	NA	98.43									Known
INTER	37	LTR		13	6	325510	326018	4	1178670	1179178	509	509	NA	NA	98.43									Known
INTER	37	LTR		13	6	325510	326018	1	2591299	2590792	509	508	NA	NA	98.04									Known
INTER	37	LTR		13	6	325510	326018	R	1971633	1971126	509	508	NA	NA	97.84									Known
INTER	37	LTR		13	6	325510	326019	R	1098353	1097845	510	509	NA	NA	98.04									Known
INTRA	37	LTR		13	6	325510	326018	6	888660	889167	509	508	562642	Tandem	98.04	Zeta-6b LTR	Zeta-6a LTR							Known
INTER	37	LTR		13	6	325778	326018	7	591609	591367	241	243	NA	NA	88.89					Unannotated LTR (partial)				Known
INTER	145	ORF		2	6	477924	477988	4	254572	254508	65	65	NA	NA	100	orf19.3470	orf19.4662	Portion	Portion
INTER	145	ORF		2	6	477924	478017	4	254602	254509	94	94	NA	NA	96.81	orf19.3470	orf19.4662	Portion	Portion
INTER	175	LTR		2	6	557176	557328	7	607117	606966	153	152	NA	NA	92.16					Unannotated LTR (partial)				Known
INTER	176	LTR		2	6	557453	557660	7	606600	606393	208	208	NA	NA	92.79					Unannotated LTR (partial)				Known
INTRA	177	ORF		2	6	557664	564162	6	744492	750965	6499	6474	180330	Tandem	92.13	Characterized orf19.5542 (SAP6), Intergenic Region, Uncharacterized orf19.5543	Characterized orf19.5716 (SAP4), Uncharacterized orf19.5717, Uncharacterized orf19.5718	Multi ORF	Multi ORF
INTRA	178	ORF		3	6	557948	560368	6	636951	634499	2421	2453	74131	Inverted	87.16	Characterized orf19.5546 (SAP2)	Characterized orf19.5585 (SAP5)	Single ORF	Single ORF
INTRA	180	Intergenic		2	6	564163	564303	6	751108	751248	141	141	186945	Mirrored	92.91
INTRA	179	ORF		3	6	630400	634204	6	750988	747178	3805	3811	112974	Inverted	93.86	Characterized orf19.5584 (PEP3)	Uncharacterized orf19.5718	Single ORF	Multi ORF
INTRA	179	ORF		3	6	630427	634209	6	564162	560383	3783	3780	73826	Inverted	96.35	orf19.5584 (PEP3)	Uncharacterized orf19.5543	Single ORF	Single ORF				INVERSION
INTRA	178	ORF		3	6	634496	636949	6	747161	744773	2454	2389	107824	Inverted	85.49	Characterized orf19.5585 (SAP5)	Characterized orf19.5716 (SAP4)	Single ORF	Multi ORF
INTRA	178	ORF		3	6	634499	636951	6	560368	557948	2453	2421	79003	Inverted	87.16	Characterized orf19.5585 (SAP5)	Characterized orf19.5546 (SAP2)	Single ORF	Single ORF
INTRA	177	ORF		2	6	744492	750965	6	557664	564162	6474	6499	193301	Tandem	92.13	Characterized orf19.5716 (SAP4), Uncharacterized orf19.5717, Uncharacterized orf19.5718	Chatacterized orf19.5542 (SAP6), Intergenic Region, Uncharacterized orf19.5543	Multi ORF	Multi ORF		LOH
INTRA	178	ORF		3	6	744773	747161	6	636949	634496	2389	2454	112665	Inverted	85.41	Characterized orf19.5716 (SAP4)	Characterized orf19.5585 (SAP5)	Multi ORF	Single ORF
INTRA	179	ORF		3	6	747178	750988	6	634204	630400	3811	3805	120588	Inverted	93.86	Uncharacterized orf19.5718	Characterized orf19.5584 (PEP3)	Single ORF	Single ORF
INTRA	180	Intergenic		2	6	751108	751248	6	564163	564303	141	141	186945	Mirrored	92.91
INTER	122	ORF		2	6	757373	758001	3	431285	430645	629	641	NA	NA	83	orf19.5723	orf19.1652	Portion	Portion
INTRA	137	ORF	ALS	MANY	6	782478	783926	6	791335	792782	1449	1448	8856	Tandem	88.84	ALS	ALS	Portion	Portion
INTER	137	ORF	ALS	MANY	6	782582	783926	R	1535847	1534503	1345	1345	NA	Tandem	84.34	ALS	ALS	Portion	Portion
INTRA	137	ORF	ALS	MANY	6	783537	783973	6	972372	972808	437	437	188835	Inverted	89.47	Characterized orf19.5736 (ALS5)	Characterized orf19.1097 (ALS2)	Portion	Portion
INTRA	137	ORF	ALS	MANY	6	783555	784292	6	904037	903300	738	738	119008	Tandem	82.46	ALS	ALS	Portion	Portion
INTRA	137	ORF	ALS	MANY	6	783930	784190	6	784038	784298	261	261	108	Tandem	86.97	ALS	ALS	Portion	Portion
INTER	137	ORF	ALS	MANY	6	784017	784186	3	1448018	1448187	170	170	NA	Tandem	85.29	ALS	ALS	Portion	Portion
INTER	137	ORF	ALS	MANY	6	784020	787527	3	1410559	1407002	3508	3558	NA	Tandem	91.39	ALS	ALS	Portion	Portion
INTRA	137	ORF	ALS	MANY	6	784038	784298	6	783930	784190	261	261	108	Tandem	86.97	ALS	ALS	Portion	Portion
INTER	137	ORF	ALS	MANY	6	784294	785090	3	1448187	1449031	797	845	NA	Tandem	84.73	ALS	ALS	Portion	Portion
INTRA	137	Intergenic	ALS	MANY	6	787670	787892	6	778356	778577	223	222	9315	Mirrored	91.52						LOH
INTER	137	ORF	ALS	MANY	6	791332	793434	R	1535949	1533851	2103	2099	NA	Tandem	83.52	ALS	ALS	Portion	Portion
INTRA	137	ORF	ALS	MANY	6	791335	792782	6	782478	783926	1448	1449	8856	Tandem	88.84	ALS	ALS	Portion	Portion
INTRA	137	ORF	ALS	MANY	6	792344	792919	6	972323	972898	576	576	179979	Tandem	88.39	ALS	ALS	Portion	Portion
INTRA	137	ORF	ALS	MANY	6	792420	793841	6	904028	902607	1422	1422	108766	Tandem	82.11	ALS	ALS	Portion	Portion
INTER	137	ORF	ALS	MANY	6	792771	793193	R	1533650	1533228	423	423	NA	Tandem	84.43	ALS	ALS	Portion	Portion
INTER	137	ORF	ALS	MANY	6	792771	793207	R	1533866	1533430	437	437	NA	Tandem	82.5	ALS	ALS	Portion	Portion
INTER	137	ORF	ALS	MANY	6	792771	793733	R	1534190	1533228	963	963	NA	Tandem	81.71	ALS	ALS	Portion	Portion
INTER	137	ORF	ALS	MANY	6	792771	793875	R	1534298	1533194	1105	1105	NA	Tandem	80.23	ALS	ALS	Portion	Portion
INTRA	137	ORF	ALS	MANY	6	792771	793841	6	974154	975224	1071	1071	181383	Tandem	80.91	ALS	ALS	Portion	Portion
INTRA	137	ORF	ALS	MANY	6	792771	793069	6	793527	793825	299	299	756	Tandem	88	ALS	ALS	Portion	Portion
INTRA	137	ORF	ALS	MANY	6	792771	793281	6	793311	793821	511	511	540	Tandem	88.65	ALS	ALS	Portion	Portion
INTRA	137	ORF	ALS	MANY	6	792771	793501	6	793095	793825	731	731	406	Tandem	89.34	ALS	ALS	Portion	Portion
INTRA	137	ORF	ALS	MANY	6	792771	793726	6	792879	793834	956	956	108	Tandem	87.04	ALS	ALS	Portion	Portion
INTRA	137	ORF	ALS	MANY	6	792771	792957	6	792987	793173	187	187	30	Tandem	89.84	ALS	ALS	Portion	Portion
INTRA	137	ORF	ALS	MANY	6	792789	793828	6	976008	977047	1040	1040	183219	Tandem	82.25	ALS	ALS	Portion	Portion
INTER	137	ORF	ALS	MANY	6	792834	793834	R	1534343	1533343	1001	1001	NA	Tandem	81.31	ALS	ALS	Portion	Portion
INTRA	137	ORF	ALS	MANY	6	792879	793834	6	792771	793726	956	956	108	Tandem	87.04	ALS	ALS	Portion	Portion
INTRA	137	ORF	ALS	MANY	6	792987	793173	6	792771	792957	187	187	216	Tandem	89.84	ALS	ALS	Portion	Portion
INTRA	137	ORF	ALS	MANY	6	793095	793825	6	792771	793501	731	731	324	Tandem	89.34	ALS	ALS	Portion	Portion
INTRA	137	ORF	ALS	MANY	6	793311	793821	6	792771	793281	511	511	540	Tandem	88.65	ALS	ALS	Portion	Portion
INTRA	137	ORF	ALS	MANY	6	793419	793783	6	972750	973114	365	365	179331	Tandem	82.56	ALS	ALS	Portion	Portion
INTRA	137	ORF	ALS	MANY	6	793527	793825	6	792771	793069	299	299	756	Tandem	88	ALS	ALS	Portion	Portion
INTRA	137	ORF	ALS	MANY	6	793536	793834	6	793320	793618	299	299	216	Tandem	86.62	ALS	ALS	Portion	Portion
INTRA	137	ORF	ALS	MANY	6	799334	799729	6	800846	801241	396	396	1512	Tandem	88.89	ALS	ALS	Portion	Portion
INTRA	137	ORF	ALS	MANY	6	799334	800567	6	800090	801322	1234	1233	755	Tandem	88.74	ALS	ALS	Portion	Portion
INTRA	137	ORF	ALS	MANY	6	799340	799513	6	801068	801241	174	174	1728	Tandem	88.51	ALS	ALS	Portion	Portion
INTRA	137	ORF	ALS	MANY	6	799340	800135	6	800528	801322	796	795	1187	Tandem	87.81	ALS	ALS	Portion	Portion
INTRA	137	ORF	ALS	MANY	6	799340	800351	6	800312	801322	1012	1011	971	Tandem	88.14	ALS	ALS	Portion	Portion
INTRA	137	ORF	ALS	MANY	6	800090	801322	6	799334	800567	1233	1234	755	Tandem	88.74	ALS	ALS	Portion	Portion
INTRA	137	ORF	ALS	MANY	6	800312	801322	6	799340	800351	1011	1012	971	Tandem	88.14	ALS	ALS	Portion	Portion
INTRA	137	ORF	ALS	MANY	6	800520	800886	6	800952	801318	367	367	432	Tandem	88.01	ALS	ALS	Portion	Portion
INTRA	137	ORF	ALS	MANY	6	800528	801322	6	799340	800135	795	796	1187	Tandem	87.81	ALS	ALS	Portion	Portion
INTRA	137	ORF	ALS	MANY	6	800846	801318	6	799334	799806	473	473	1512	Tandem	88.16	ALS	ALS	Portion	Portion
INTRA	137	ORF	ALS	MANY	6	801068	801318	6	799340	799590	251	251	1728	Tandem	87.25	ALS	ALS	Portion	Portion
INTER	37	LTR		13	6	888660	889167	1	2591299	2590792	508	508	NA	NA	99.61									Known
INTER	37	LTR		13	6	888660	889167	4	1178670	1179178	508	509	NA	NA	99.61									Known
INTER	37	LTR		13	6	888660	889167	R	1098353	1097846	508	508	NA	NA	99.61									Known
INTER	37	LTR		13	6	888660	889167	R	625687	626194	508	508	NA	NA	99.41									Known
INTER	37	LTR		13	6	888660	889167	3	822260	822759	508	500	NA	NA	91.16									Known
INTER	37	LTR		13	6	888660	889168	4	637644	637136	509	509	NA	NA	99.61									Known
INTER	37	LTR		13	6	888660	889168	R	1971633	1971125	509	509	NA	NA	99.02									Known
INTRA	37	LTR		13	6	888660	889167	6	325510	326018	508	509	563657	Tandem	98.04	Zeta-6a LTR	Zeta-6b LTR							Known
INTER	37	LTR		13	6	888666	889072	1	1291696	1291288	407	409	NA	NA	94.13					Unannotated LTR (partial)				Known
INTER	37	LTR		13	6	888666	888983	2	2169035	2168718	318	318	NA	NA	94.65									Known
INTER	37	LTR		13	6	888927	889171	7	591609	591363	245	247	NA	NA	89.07					Unannotated LTR (partial)				Known
INTER	37	LTR		13	6	889091	889168	2	2168716	2168639	78	78	NA	NA	100									Known
INTRA	137	ORF	ALS	MANY	6	898248	901910	6	979471	975813	3663	3659	73903	Inverted	89.28	ALS	ALS	Portion	Portion			CNV
INTRA	137	ORF	ALS	MANY	6	899800	901045	6	975007	973762	1246	1246	72717	Tandem	81.07	ALS	ALS	Portion	Portion
INTRA	137	ORF	ALS	MANY	6	899800	902807	6	976627	973620	3008	3008	70813	Tandem	83.58	ALS	ALS	Portion	Portion
INTRA	137	ORF	ALS	MANY	6	899815	900776	6	977152	976191	962	962	75415	Tandem	84.04	ALS	ALS	Portion	Portion
INTRA	137	ORF	ALS	MANY	6	899815	902477	6	901003	903665	2663	2663	1188	Tandem	81.59	ALS	ALS	Portion	Portion
INTRA	137	ORF	ALS	MANY	6	899815	902549	6	900571	903305	2735	2735	756	Tandem	86.12	ALS	ALS	Portion	Portion
INTRA	137	ORF	ALS	MANY	6	899818	901721	6	901762	903665	1904	1904	1944	Tandem	81.58	ALS	ALS	Portion	Portion
INTRA	137	ORF	ALS	MANY	6	899844	901292	6	977015	975567	1449	1449	74275	Tandem	82.77	ALS	ALS	Portion	Portion
INTRA	137	ORF	ALS	MANY	6	899844	901625	6	901896	903677	1782	1782	2052	Tandem	80.62	ALS	ALS	Portion	Portion
INTRA	137	ORF	ALS	MANY	6	899844	901949	6	901464	903569	2106	2106	1620	Tandem	82.12	ALS	ALS	Portion	Portion
INTRA	137	ORF	ALS	MANY	6	899845	900968	6	974530	973407	1124	1124	72439	Tandem	82.67	ALS	ALS	Portion	Portion
INTRA	137	ORF	ALS	MANY	6	899845	902805	6	976474	973514	2961	2961	70709	Tandem	80.99	ALS	ALS	Portion	Portion
INTRA	137	ORF	ALS	MANY	6	899845	902813	6	900493	903461	2969	2969	648	Tandem	81.84	ALS	ALS	Portion	Portion
INTRA	137	ORF	ALS	MANY	6	899848	900863	6	973771	972756	1016	1016	71893	Tandem	81.73	ALS	ALS	Portion	Portion
INTRA	137	ORF	ALS	MANY	6	899848	901157	6	902008	903317	1310	1310	2160	Tandem	80.47	ALS	ALS	Portion	Portion
INTRA	137	ORF	ALS	MANY	6	899851	900377	6	976144	975618	527	527	75241	Tandem	83.49	ALS	ALS	Portion	Portion
INTRA	137	ORF	ALS	MANY	6	899851	902710	6	900715	903574	2860	2860	864	Tandem	82.3	ALS	ALS	Portion	Portion
INTRA	137	ORF	ALS	MANY	6	899851	902710	6	900283	903142	2860	2860	432	Tandem	81.95	ALS	ALS	Portion	Portion
INTRA	137	ORF	ALS	MANY	6	899851	903569	6	899959	903677	3719	3719	108	Tandem	84.08	ALS	ALS	Portion	Portion
INTRA	137	ORF	ALS	MANY	6	899857	902597	6	900937	903677	2741	2741	1080	Tandem	82.24	ALS	ALS	Portion	Portion
INTRA	137	ORF	ALS	MANY	6	899959	903110	6	899851	903002	3152	3152	108	Tandem	83.06	ALS	ALS	Portion	Portion
INTRA	137	ORF	ALS	MANY	6	900067	903677	6	977872	974262	3611	3611	70585	Tandem	81.16	ALS	ALS	Portion	Portion
INTRA	137	ORF	ALS	MANY	6	900181	900515	6	977866	977532	335	335	77017	Tandem	89.85	ALS	ALS	Portion	Portion
INTRA	137	ORF	ALS	MANY	6	900244	900662	6	977047	976629	419	419	75967	Tandem	89.74	ALS	ALS	Portion	Portion
INTRA	137	ORF	ALS	MANY	6	900283	903677	6	899851	903245	3395	3395	432	Tandem	83.14	ALS	ALS	Portion	Portion
INTRA	137	ORF	ALS	MANY	6	900353	901841	6	902189	903677	1489	1489	1836	Tandem	83.12	ALS	ALS	Portion	Portion
INTRA	137	ORF	ALS	MANY	6	900353	901949	6	902081	903677	1597	1597	1728	Tandem	82.04	ALS	ALS	Portion	Portion
INTRA	137	ORF	ALS	MANY	6	900353	902165	6	901865	903677	1813	1813	1512	Tandem	82.69	ALS	ALS	Portion	Portion
INTRA	137	ORF	ALS	MANY	6	900353	902452	6	901325	903424	2100	2100	972	Tandem	81.54	ALS	ALS	Portion	Portion
INTRA	137	ORF	ALS	MANY	6	900377	901517	6	973890	972750	1141	1141	71233	Tandem	80.89	ALS	ALS	Portion	Portion
INTRA	137	ORF	ALS	MANY	6	900382	901712	6	975073	973743	1331	1331	72031	Tandem	82.73	ALS	ALS	Portion	Portion
INTRA	137	ORF	ALS	MANY	6	900382	901193	6	973561	972750	812	812	71557	Tandem	81.3	ALS	ALS	Portion	Portion
INTRA	137	ORF	ALS	MANY	6	900403	901151	6	974620	973872	749	749	72721	Tandem	85.45	ALS	ALS	Portion	Portion
INTRA	137	ORF	ALS	MANY	6	900403	901400	6	974188	973191	998	998	71791	Tandem	83.57	ALS	ALS	Portion	Portion
INTRA	137	ORF	ALS	MANY	6	900493	903461	6	899845	902813	2969	2969	648	Tandem	81.84	ALS	ALS	Portion	Portion
INTRA	137	ORF	ALS	MANY	6	900542	903389	6	976857	974010	2848	2848	70621	Tandem	82.2	ALS	ALS	Portion	Portion
INTRA	137	ORF	ALS	MANY	6	900571	903677	6	899815	902921	3107	3107	756	Tandem	86.39	ALS	ALS	Portion	Portion
INTRA	137	ORF	ALS	MANY	6	900623	903650	6	977532	974505	3028	3028	70855	Tandem	80.24	ALS	ALS	Portion	Portion
INTRA	137	ORF	ALS	MANY	6	900664	903353	6	976519	973830	2690	2690	70477	Tandem	81	ALS	ALS	Portion	Portion
INTRA	137	ORF	ALS	MANY	6	900698	903260	6	900914	903476	2563	2563	216	Tandem	83.08	ALS	ALS	Portion	Portion
INTRA	137	ORF	ALS	MANY	6	900715	903317	6	899851	902453	2603	2603	864	Tandem	82.13	ALS	ALS	Portion	Portion
INTRA	137	ORF	ALS	MANY	6	900778	903583	6	975973	973168	2806	2806	69585	Tandem	80.57	ALS	ALS	Portion	Portion
INTRA	137	ORF	ALS	MANY	6	900787	902381	6	902083	903677	1595	1595	1296	Tandem	84.03	ALS	ALS	Portion	Portion
INTRA	137	ORF	ALS	MANY	6	900790	902057	6	902194	903461	1268	1268	1404	Tandem	84.02	ALS	ALS	Portion	Portion
INTRA	137	ORF	ALS	MANY	6	900793	902900	6	975850	973743	2108	2108	70843	Tandem	83.7	ALS	ALS	Portion	Portion
INTRA	137	ORF	ALS	MANY	6	900839	903677	6	977532	974694	2839	2839	71017	Tandem	81.05	ALS	ALS	Portion	Portion
INTRA	137	ORF	ALS	MANY	6	900874	903619	6	975661	972916	2746	2746	69297	Tandem	81.66	ALS	ALS	Portion	Portion
INTRA	137	ORF	ALS	MANY	6	900901	903514	6	977146	974533	2614	2614	71019	Tandem	82.7	ALS	ALS	Portion	Portion
INTRA	137	ORF	ALS	MANY	6	900910	903014	6	976165	974061	2105	2105	71047	Tandem	80.44	ALS	ALS	Portion	Portion
INTRA	137	ORF	ALS	MANY	6	900914	902683	6	900698	902467	1770	1770	216	Tandem	81.32	ALS	ALS	Portion	Portion
INTRA	137	ORF	ALS	MANY	6	900937	903677	6	899857	902597	2741	2741	1080	Tandem	82.24	ALS	ALS	Portion	Portion
INTRA	137	ORF	ALS	MANY	6	901003	903665	6	899815	902477	2663	2663	1188	Tandem	81.59	ALS	ALS	Portion	Portion
INTRA	137	ORF	ALS	MANY	6	901015	902695	6	975196	973516	1681	1681	70821	Tandem	82.84	ALS	ALS	Portion	Portion
INTRA	137	ORF	ALS	MANY	6	901075	903668	6	977512	974919	2594	2594	71251	Tandem	81.46	ALS	ALS	Portion	Portion
INTRA	137	ORF	ALS	MANY	6	901153	901316	6	973762	973599	164	164	72283	Tandem	91.46	ALS	ALS	Portion	Portion
INTRA	137	ORF	ALS	MANY	6	901157	903100	6	901481	903424	1944	1944	324	Tandem	83.68	ALS	ALS	Portion	Portion
INTRA	137	ORF	ALS	MANY	6	901267	903137	6	901807	903677	1871	1871	540	Tandem	84.04	ALS	ALS	Portion	Portion
INTRA	137	ORF	ALS	MANY	6	901325	902683	6	900353	901711	1359	1359	972	Tandem	80.29	ALS	ALS	Portion	Portion
INTRA	137	ORF	ALS	MANY	6	901330	903677	6	900790	903137	2348	2348	540	Tandem	83.36	ALS	ALS	Portion	Portion
INTRA	137	ORF	ALS	MANY	6	901402	901721	6	973081	972762	320	320	71041	Tandem	82.81	ALS	ALS	Portion	Portion
INTRA	137	ORF	ALS	MANY	6	901431	902273	6	973592	972750	843	843	70477	Tandem	85.29	ALS	ALS	Portion	Portion
INTRA	137	ORF	ALS	MANY	6	901464	903677	6	899844	902057	2214	2214	1620	Tandem	82.27	ALS	ALS	Portion	Portion
INTRA	137	ORF	ALS	MANY	6	901481	903424	6	901157	903100	1944	1944	324	Tandem	83.68	ALS	ALS	Portion	Portion
INTRA	137	ORF	ALS	MANY	6	901570	902846	6	977125	975849	1277	1277	73003	Tandem	80	ALS	ALS	Portion	Portion
INTRA	137	ORF	ALS	MANY	6	901595	903677	6	977532	975450	2083	2083	71773	Tandem	80.42	ALS	ALS	Portion	Portion
INTRA	137	ORF	ALS	MANY	6	901762	903665	6	899818	901721	1904	1904	1944	Tandem	81.58	ALS	ALS	Portion	Portion
INTRA	137	ORF	ALS	MANY	6	901831	902813	6	973732	972750	983	983	69937	Tandem	80.43	ALS	ALS	Portion	Portion
INTRA	137	ORF	ALS	MANY	6	901865	903677	6	900353	902165	1813	1813	1512	Tandem	82.69	ALS	ALS	Portion	Portion
INTRA	137	ORF	ALS	MANY	6	901896	903677	6	899844	901625	1782	1782	2052	Tandem	80.62	ALS	ALS	Portion	Portion
INTRA	137	ORF	ALS	MANY	6	901927	902921	6	902683	903677	995	995	756	Tandem	86.65	ALS	ALS	Portion	Portion
INTRA	137	ORF	ALS	MANY	6	902008	903677	6	899848	901517	1670	1670	2160	Tandem	82.29	ALS	ALS	Portion	Portion
INTRA	137	ORF	ALS	MANY	6	902047	902906	6	973732	972873	860	860	69967	Tandem	85.35	ALS	ALS	Portion	Portion
INTRA	137	ORF	ALS	MANY	6	902052	903245	6	902484	903677	1194	1194	432	Tandem	86.69	ALS	ALS	Portion	Portion
INTRA	137	ORF	ALS	MANY	6	902081	903677	6	900353	901949	1597	1597	1728	Tandem	82.04	ALS	ALS	Portion	Portion
INTRA	137	ORF	ALS	MANY	6	902083	903677	6	900787	902381	1595	1595	1296	Tandem	84.03	ALS	ALS	Portion	Portion
INTRA	137	ORF	ALS	MANY	6	902189	903677	6	900353	901841	1489	1489	1836	Tandem	83.12	ALS	ALS	Portion	Portion
INTRA	137	ORF	ALS	MANY	6	902194	903389	6	975637	974442	1196	1196	71053	Tandem	81.48	ALS	ALS	Portion	Portion
INTRA	137	ORF	ALS	MANY	6	902194	903677	6	976069	974586	1484	1484	70909	Tandem	82.74	ALS	ALS	Portion	Portion
INTRA	137	ORF	ALS	MANY	6	902194	903002	6	973801	972993	809	809	69991	Tandem	81.21	ALS	ALS	Portion	Portion
INTRA	137	ORF	ALS	MANY	6	902194	903461	6	900790	902057	1268	1268	1404	Tandem	84.02	ALS	ALS	Portion	Portion
INTRA	137	ORF	ALS	MANY	6	902229	903659	6	974738	973308	1431	1431	69649	Tandem	81.73	ALS	ALS	Portion	Portion
INTRA	137	ORF	ALS	MANY	6	902268	903677	6	974915	973506	1410	1410	69829	Tandem	80.07	ALS	ALS	Portion	Portion
INTRA	137	ORF	ALS	MANY	6	902351	903362	6	977532	976521	1012	1012	73159	Tandem	80.97	ALS	ALS	Portion	Portion
INTRA	137	ORF	ALS	MANY	6	902607	904028	6	793841	792420	1422	1422	111608	Tandem	82.11	ALS	ALS	Portion	Portion
INTRA	137	ORF	ALS	MANY	6	902803	903569	6	973516	972750	767	767	69181	Tandem	82.55	ALS	ALS	Portion	Portion
INTRA	137	ORF	ALS	MANY	6	902858	903677	6	975621	974802	820	820	71125	Tandem	84.57	ALS	ALS	Portion	Portion
INTRA	137	ORF	ALS	MANY	6	902863	903344	6	976048	975567	482	482	72223	Tandem	82.23	ALS	ALS	Portion	Portion
INTRA	137	ORF	ALS	MANY	6	902884	903677	6	975919	975126	794	794	71449	Tandem	84.67	ALS	ALS	Portion	Portion
INTRA	137	ORF	ALS	MANY	6	902887	903424	6	901915	902452	538	538	972	Tandem	85.53	ALS	ALS	Portion	Portion
INTRA	137	ORF	ALS	MANY	6	903007	903137	6	972880	972750	131	131	69613	Inverted	95.42	ALS	ALS	Portion	Portion
INTRA	137	ORF	ALS	MANY	6	903019	903677	6	973624	972966	659	659	69289	Tandem	81.34	ALS	ALS	Portion	Portion
INTRA	137	ORF	ALS	MANY	6	903236	903677	6	975459	975018	442	442	71341	Tandem	88.91	ALS	ALS	Portion	Portion
INTRA	137	ORF	ALS	MANY	6	903300	904037	6	784292	783555	738	738	120482	Tandem	82.46	ALS	ALS	Portion	Portion
INTRA	137	ORF	ALS	MANY	6	903379	903668	6	976396	976107	290	290	72439	Tandem	81.03	ALS	ALS	Portion	Portion
INTRA	137	ORF	ALS	MANY	6	903379	903659	6	976072	975792	281	281	72133	Tandem	84.04	ALS	ALS	Portion	Portion
INTRA	137	ORF	ALS	MANY	6	903485	903677	6	975534	975342	193	193	71665	Tandem	86.01	ALS	ALS	Portion	Portion
INTRA	137	ORF	ALS	MANY	6	904689	905326	6	971741	971125	638	617	65799	Tandem	81.97	ALS	ALS	Portion	Portion
INTRA	137	Intergenic	ALS	MANY	6	905504	906128	6	970956	970345	625	612	64217	Mirrored	81.83
INTRA	137	Intergenic	ALS	MANY	6	970345	970956	6	906128	905504	612	625	65452	Mirrored	81.83
INTRA	137	ORF	ALS	MANY	6	971125	971741	6	905326	904689	617	638	67052	Tandem	81.97	ALS	ALS	Portion	Portion
INTER	137	ORF	ALS	MANY	6	971493	972285	R	1535774	1534982	793	793	NA	NA	83.02	ALS	ALS	Portion	Portion
INTRA	137	ORF	ALS	MANY	6	972323	972898	6	792344	792919	576	576	179979	Tandem	88.39	ALS	ALS	Portion	Portion
INTRA	137	ORF	ALS	MANY	6	972372	972808	6	783537	783973	437	437	188835	Tandem	89.47	ALS	ALS	Portion	Portion
INTRA	137	ORF	ALS	MANY	6	972390	972868	6	904037	903559	479	479	69309	Tandem	92.92	ALS	ALS	Portion	Portion
INTRA	137	ORF	ALS	MANY	6	972750	973114	6	793419	793783	365	365	179331	Tandem	82.56	ALS	ALS	Portion	Portion
INTRA	137	ORF	ALS	MANY	6	972750	974188	6	901841	900403	1439	1439	73785	Tandem	82.58	ALS	ALS	Portion	Portion
INTRA	137	ORF	ALS	MANY	6	972750	973619	6	901193	900324	870	870	73295	Tandem	81.17	ALS	ALS	Portion	Portion
INTRA	137	ORF	ALS	MANY	6	972750	974131	6	902813	901432	1382	1382	72699	Tandem	80.16	ALS	ALS	Portion	Portion
INTRA	137	ORF	ALS	MANY	6	972750	974482	6	903569	901837	1733	1733	72645	Tandem	81.64	ALS	ALS	Portion	Portion
INTRA	137	ORF	ALS	MANY	6	972750	973380	6	901517	900887	631	631	72493	Tandem	83.04	ALS	ALS	Portion	Portion
INTRA	137	ORF	ALS	MANY	6	972750	973630	6	902273	901393	881	881	72237	Tandem	85.47	ALS	ALS	Portion	Portion
INTRA	137	ORF	ALS	MANY	6	972750	973152	6	903353	902951	403	403	70201	Tandem	87.34	ALS	ALS	Portion	Portion
INTRA	137	ORF	ALS	MANY	6	972750	972900	6	903137	902987	151	151	69913	Tandem	92.72	ALS	ALS	Portion	Portion
INTRA	137	ORF	ALS	MANY	6	972750	973559	6	977070	977879	810	810	4320	Tandem	80.42	ALS	ALS	Portion	Portion
INTRA	137	ORF	ALS	MANY	6	972750	975175	6	975450	977875	2426	2426	2700	Tandem	81.32	ALS	ALS	Portion	Portion
INTRA	137	ORF	ALS	MANY	6	972750	974112	6	975342	976704	1363	1363	2592	Tandem	81.47	ALS	ALS	Portion	Portion
INTRA	137	ORF	ALS	MANY	6	972750	975211	6	975018	977479	2462	2462	2268	Tandem	81.85	ALS	ALS	Portion	Portion
INTRA	137	ORF	ALS	MANY	6	972750	974437	6	974370	976057	1688	1688	1620	Tandem	80.69	ALS	ALS	Portion	Portion
INTRA	137	ORF	ALS	MANY	6	972750	973216	6	974154	974620	467	467	1404	Tandem	80	ALS	ALS	Portion	Portion
INTRA	137	ORF	ALS	MANY	6	972750	973216	6	973722	974188	467	467	972	Tandem	80.21	ALS	ALS	Portion	Portion
INTRA	137	ORF	ALS	MANY	6	972750	975268	6	973506	976024	2519	2519	756	Tandem	81.2	ALS	ALS	Portion	Portion
INTRA	137	ORF	ALS	MANY	6	972750	975949	6	973398	976597	3200	3200	648	Tandem	81.85	ALS	ALS	Portion	Portion
INTRA	137	ORF	ALS	MANY	6	972750	976603	6	973182	977035	3854	3854	432	Tandem	85.5	ALS	ALS	Portion	Portion
INTRA	137	ORF	ALS	MANY	6	972750	976060	6	973074	976384	3311	3311	324	Tandem	80.07	ALS	ALS	Portion	Portion
INTRA	137	ORF	ALS	MANY	6	972750	976171	6	972966	976387	3422	3422	216	Tandem	82.62	ALS	ALS	Portion	Portion
INTRA	137	ORF	ALS	MANY	6	972756	973771	6	900863	899848	1016	1016	73923	Tandem	81.73	ALS	ALS	Portion	Portion
INTRA	137	ORF	ALS	MANY	6	972759	975007	6	975675	977923	2249	2249	2916	Tandem	80.77	ALS	ALS	Portion	Portion
INTRA	137	ORF	ALS	MANY	6	972759	974544	6	974919	976704	1786	1786	2160	Tandem	81.93	ALS	ALS	Portion	Portion
INTRA	137	ORF	ALS	MANY	6	972762	973417	6	901721	901066	656	656	72351	Tandem	80.49	ALS	ALS	Portion	Portion
INTRA	137	ORF	ALS	MANY	6	972858	974665	6	903677	901870	1808	1808	72795	Tandem	80.29	ALS	ALS	Portion	Portion
INTRA	137	ORF	ALS	MANY	6	972954	973771	6	977058	977875	818	818	4104	Tandem	81.49	ALS	ALS	Portion	Portion
INTRA	137	ORF	ALS	MANY	6	972957	974589	6	902822	901190	1633	1633	73399	Tandem	83.55	ALS	ALS	Portion	Portion
INTRA	137	ORF	ALS	MANY	6	972966	973406	6	903677	903237	441	441	70169	Tandem	80.73	ALS	ALS	Portion	Portion
INTRA	137	ORF	ALS	MANY	6	972966	975184	6	972750	974968	2219	2219	216	Tandem	82.5	ALS	ALS	Portion	Portion
INTRA	137	ORF	ALS	MANY	6	973010	974563	6	902985	901432	1554	1554	73131	Tandem	80.03	ALS	ALS	Portion	Portion
INTRA	137	ORF	ALS	MANY	6	973074	976384	6	972750	976060	3311	3311	324	Tandem	80.07	ALS	ALS	Portion	Portion
INTRA	137	ORF	ALS	MANY	6	973168	976201	6	973276	976309	3034	3034	108	Tandem	80.97	ALS	ALS	Portion	Portion
INTRA	137	ORF	ALS	MANY	6	973182	975412	6	972750	974980	2231	2231	432	Tandem	85.68	ALS	ALS	Portion	Portion
INTRA	137	ORF	ALS	MANY	6	973221	974155	6	974733	975667	935	935	1512	Tandem	82.92	ALS	ALS	Portion	Portion
INTRA	137	ORF	ALS	MANY	6	973243	976144	6	974971	977872	2902	2902	1728	Tandem	81.38	ALS	ALS	Portion	Portion
INTRA	137	ORF	ALS	MANY	6	973250	974587	6	974330	975667	1338	1338	1080	Tandem	82.48	ALS	ALS	Portion	Portion
INTRA	137	ORF	ALS	MANY	6	973308	974812	6	903659	902155	1505	1505	72657	Tandem	81.9	ALS	ALS	Portion	Portion
INTRA	137	ORF	ALS	MANY	6	973332	974563	6	974628	975859	1232	1232	1296	Tandem	81.62	ALS	ALS	Portion	Portion
INTRA	137	ORF	ALS	MANY	6	973332	974764	6	974196	975628	1433	1433	864	Tandem	83.69	ALS	ALS	Portion	Portion
INTRA	137	ORF	ALS	MANY	6	973398	976597	6	972750	975949	3200	3200	648	Tandem	81.85	ALS	ALS	Portion	Portion
INTRA	137	ORF	ALS	MANY	6	973406	976291	6	903021	900136	2886	2886	76155	Tandem	83.62	ALS	ALS	Portion	Portion
INTRA	137	ORF	ALS	MANY	6	973406	976029	6	902913	900290	2624	2624	75739	Tandem	81.14	ALS	ALS	Portion	Portion
INTRA	137	ORF	ALS	MANY	6	973406	975804	6	902805	900407	2399	2399	75397	Tandem	81.86	ALS	ALS	Portion	Portion
INTRA	137	ORF	ALS	MANY	6	973406	975661	6	903129	900874	2256	2256	74787	Tandem	81.73	ALS	ALS	Portion	Portion
INTRA	137	ORF	ALS	MANY	6	973419	974016	6	900956	900359	598	598	73657	Tandem	84.31	ALS	ALS	Portion	Portion
INTRA	137	ORF	ALS	MANY	6	973506	975919	6	903677	901264	2414	2414	74655	Tandem	81.98	ALS	ALS	Portion	Portion
INTRA	137	ORF	ALS	MANY	6	973506	976024	6	972750	975268	2519	2519	756	Tandem	81.2	ALS	ALS	Portion	Portion
INTRA	137	ORF	ALS	MANY	6	973514	975916	6	903237	900835	2403	2403	75081	Tandem	80.84	ALS	ALS	Portion	Portion
INTRA	137	ORF	ALS	MANY	6	973548	973648	6	977220	977320	101	101	3572	Tandem	94.06	ALS	ALS	Portion	Portion
INTRA	137	ORF	ALS	MANY	6	973635	974049	6	901280	900866	415	415	73183	Tandem	84.38	ALS	ALS	Portion	Portion
INTRA	137	ORF	ALS	MANY	6	973722	974188	6	972750	973216	467	467	972	Tandem	80.21	ALS	ALS	Portion	Portion
INTRA	137	ORF	ALS	MANY	6	973756	974311	6	977320	977875	556	556	3564	Tandem	81.9	ALS	ALS	Portion	Portion
INTRA	137	ORF	ALS	MANY	6	973830	975787	6	903677	901720	1958	1958	74067	Tandem	80.78	ALS	ALS	Portion	Portion
INTRA	137	ORF	ALS	MANY	6	973838	976410	6	903237	900665	2573	2573	75745	Tandem	80.5	ALS	ALS	Portion	Portion
INTRA	137	ORF	ALS	MANY	6	974007	975103	6	976383	977479	1097	1097	2376	Tandem	80.45	ALS	ALS	Portion	Portion
INTRA	137	ORF	ALS	MANY	6	974037	974746	6	977169	977878	710	710	3132	Tandem	81.74	ALS	ALS	Portion	Portion
INTRA	137	ORF	ALS	MANY	6	974049	974448	6	900758	900359	400	400	74089	Tandem	85.04	ALS	ALS	Portion	Portion
INTRA	137	ORF	ALS	MANY	6	974154	975224	6	792771	793841	1071	1071	181383	Tandem	80.91	ALS	ALS	Portion	Portion
INTRA	137	ORF	ALS	MANY	6	974154	974620	6	972750	973216	467	467	1404	Tandem	80	ALS	ALS	Portion	Portion
INTRA	137	ORF	ALS	MANY	6	974160	974664	6	900863	900359	505	505	74305	Tandem	88.32	ALS	ALS	Portion	Portion
INTRA	137	ORF	ALS	MANY	6	974160	974805	6	901295	900650	646	646	74155	Tandem	82.66	ALS	ALS	Portion	Portion
INTRA	137	ORF	ALS	MANY	6	974188	977035	6	973756	976603	2848	2848	432	Tandem	87	ALS	ALS	Portion	Portion
INTRA	137	ORF	ALS	MANY	6	974196	975628	6	973332	974764	1433	1433	864	Tandem	83.69	ALS	ALS	Portion	Portion
INTRA	137	ORF	ALS	MANY	6	974244	975475	6	976188	977419	1232	1232	1944	Tandem	81.28	ALS	ALS	Portion	Portion
INTRA	137	ORF	ALS	MANY	6	974262	975661	6	903677	902278	1400	1400	73383	Tandem	82.47	ALS	ALS	Portion	Portion
INTRA	137	ORF	ALS	MANY	6	974330	975667	6	973250	974587	1338	1338	1080	Tandem	82.48	ALS	ALS	Portion	Portion
INTRA	137	ORF	ALS	MANY	6	974370	976714	6	903677	901333	2345	2345	75381	Tandem	83.85	ALS	ALS	Portion	Portion
INTRA	137	ORF	ALS	MANY	6	974370	976287	6	972750	974667	1918	1918	1620	Tandem	80.71	ALS	ALS	Portion	Portion
INTRA	137	ORF	ALS	MANY	6	974505	975814	6	903650	902341	1310	1310	73473	Tandem	82.33	ALS	ALS	Portion	Portion
INTRA	137	ORF	ALS	MANY	6	974586	976069	6	903677	902194	1484	1484	73875	Tandem	82.74	ALS	ALS	Portion	Portion
INTRA	137	ORF	ALS	MANY	6	974592	975211	6	901079	900460	620	620	74751	Tandem	81.45	ALS	ALS	Portion	Portion
INTRA	137	ORF	ALS	MANY	6	974628	976069	6	973332	974773	1442	1442	1296	Tandem	80.9	ALS	ALS	Portion	Portion
INTRA	137	ORF	ALS	MANY	6	974694	977047	6	902597	900244	2354	2354	76803	Tandem	84.05	ALS	ALS	Portion	Portion
INTRA	137	ORF	ALS	MANY	6	974694	975487	6	903677	902884	794	794	72603	Tandem	87.17	ALS	ALS	Portion	Portion
INTRA	137	ORF	ALS	MANY	6	974703	976907	6	975675	977879	2205	2205	972	Tandem	80.8	ALS	ALS	Portion	Portion
INTRA	137	ORF	ALS	MANY	6	974709	975319	6	976221	976831	611	611	1512	Tandem	83.01	ALS	ALS	Portion	Portion
INTRA	137	ORF	ALS	MANY	6	974733	975667	6	973221	974155	935	935	1512	Tandem	82.92	ALS	ALS	Portion	Portion
INTRA	137	ORF	ALS	MANY	6	974802	975694	6	903677	902785	893	893	72909	Tandem	84.06	ALS	ALS	Portion	Portion
INTRA	137	ORF	ALS	MANY	6	974808	975859	6	901187	900136	1052	1052	75723	Tandem	82.37	ALS	ALS	Portion	Portion
INTRA	137	ORF	ALS	MANY	6	974817	976857	6	902042	900002	2041	2041	76855	Tandem	82.06	ALS	ALS	Portion	Portion
INTRA	137	ORF	ALS	MANY	6	974817	976411	6	901826	900232	1595	1595	76179	Tandem	84.54	ALS	ALS	Portion	Portion
INTRA	137	ORF	ALS	MANY	6	974817	976069	6	902582	901330	1253	1253	74739	Tandem	84.96	ALS	ALS	Portion	Portion
INTRA	137	ORF	ALS	MANY	6	974919	975592	6	903668	902995	674	674	72597	Tandem	86.96	ALS	ALS	Portion	Portion
INTRA	137	ORF	ALS	MANY	6	974971	977872	6	973243	976144	2902	2902	1728	Tandem	81.38	ALS	ALS	Portion	Portion
INTRA	137	ORF	ALS	MANY	6	974982	976291	6	975522	976831	1310	1310	540	Tandem	81.57	ALS	ALS	Portion	Portion
INTRA	137	ORF	ALS	MANY	6	975015	975712	6	977175	977872	698	698	2160	Tandem	82.71	ALS	ALS	Portion	Portion
INTRA	137	ORF	ALS	MANY	6	975018	977125	6	903677	901570	2108	2108	75555	Tandem	81.4	ALS	ALS	Portion	Portion
INTRA	137	ORF	ALS	MANY	6	975018	977479	6	972750	975211	2462	2462	2268	Tandem	81.85	ALS	ALS	Portion	Portion
INTRA	137	ORF	ALS	MANY	6	975048	975637	6	902783	902194	590	590	73443	Tandem	83.22	ALS	ALS	Portion	Portion
INTRA	137	ORF	ALS	MANY	6	975126	975919	6	903677	902884	794	794	73035	Tandem	84.67	ALS	ALS	Portion	Portion
INTRA	137	ORF	ALS	MANY	6	975189	976309	6	975081	976201	1121	1121	108	Tandem	81.92	ALS	ALS	Portion	Portion
INTRA	137	ORF	ALS	MANY	6	975273	976387	6	975057	976171	1115	1115	216	Tandem	83.2	ALS	ALS	Portion	Portion
INTRA	137	ORF	ALS	MANY	6	975342	975778	6	903677	903241	437	437	72537	Tandem	80.18	ALS	ALS	Portion	Portion
INTRA	137	ORF	ALS	MANY	6	975342	976704	6	972750	974112	1363	1363	2592	Tandem	81.47	ALS	ALS	Portion	Portion
INTRA	137	ORF	ALS	MANY	6	975444	975592	6	976848	976996	149	149	1256	Tandem	89.93	ALS	ALS	Portion	Portion
INTRA	137	ORF	ALS	MANY	6	975450	977586	6	903677	901541	2137	2137	76045	Tandem	80.31	ALS	ALS	Portion	Portion
INTRA	137	ORF	ALS	MANY	6	975450	977875	6	972750	975175	2426	2426	2700	Tandem	81.32	ALS	ALS	Portion	Portion
INTRA	137	ORF	ALS	MANY	6	975480	975856	6	977532	977908	377	377	2052	Tandem	83.07	ALS	ALS	Portion	Portion
INTRA	137	ORF	ALS	MANY	6	975518	976831	6	974978	976291	1314	1314	540	Tandem	81.55	ALS	ALS	Portion	Portion
INTRA	137	ORF	ALS	MANY	6	975675	979471	6	902048	898248	3797	3801	81223	Tandem	88.8	ALS	ALS	Portion	Portion
INTRA	137	ORF	ALS	MANY	6	975675	977923	6	972759	975007	2249	2249	2916	Tandem	80.77	ALS	ALS	Portion	Portion
INTRA	137	ORF	ALS	MANY	6	975675	977879	6	974703	976907	2205	2205	972	Tandem	80.8	ALS	ALS	Portion	Portion
INTRA	137	ORF	ALS	MANY	6	975756	976252	6	977376	977872	497	497	1620	Tandem	82.53	ALS	ALS	Portion	Portion
INTRA	137	ORF	ALS	MANY	6	975804	977586	6	902783	901001	1783	1783	76585	Tandem	80.02	ALS	ALS	Portion	Portion
INTRA	137	ORF	ALS	MANY	6	975926	976825	6	901473	900574	900	900	76251	Tandem	81.04	ALS	ALS	Portion	Portion
INTRA	137	ORF	ALS	MANY	6	976008	977047	6	792789	793828	1040	1040	183219	Tandem	82.25	ALS	ALS	Portion	Portion
INTRA	137	ORF	ALS	MANY	6	976080	977677	6	901859	900262	1598	1598	77415	Tandem	80.84	ALS	ALS	Portion	Portion
INTRA	137	ORF	ALS	MANY	6	976188	977479	6	973812	975103	1292	1292	2376	Tandem	80.23	ALS	ALS	Portion	Portion
INTRA	137	ORF	ALS	MANY	6	976287	976831	6	974775	975319	545	545	1512	Tandem	82.78	ALS	ALS	Portion	Portion
INTRA	137	ORF	ALS	MANY	6	976377	977503	6	974433	975559	1127	1127	1944	Tandem	81.84	ALS	ALS	Portion	Portion
INTRA	137	ORF	ALS	MANY	6	976410	976638	6	900557	900329	229	229	76309	Tandem	92.14	ALS	ALS	Portion	Portion
INTRA	137	ORF	ALS	MANY	6	976419	977152	6	977175	977908	734	734	756	Tandem	84.67	ALS	ALS	Portion	Portion
INTRA	137	ORF	ALS	MANY	6	976521	977019	6	977169	977667	499	499	648	Tandem	84.63	ALS	ALS	Portion	Portion
INTRA	137	ORF	ALS	MANY	6	976710	977908	6	974658	975856	1199	1199	2052	Tandem	80.02	ALS	ALS	Portion	Portion
INTRA	137	ORF	ALS	MANY	6	976848	976996	6	975444	975592	149	149	1404	Tandem	89.93	ALS	ALS	Portion	Portion
INTRA	137	ORF	ALS	MANY	6	977058	977875	6	972954	973771	818	818	4104	Tandem	81.49	ALS	ALS	Portion	Portion
INTRA	137	ORF	ALS	MANY	6	977070	977879	6	972750	973559	810	810	4320	Tandem	80.42	ALS	ALS	Portion	Portion
INTRA	137	ORF	ALS	MANY	6	977079	977770	6	977187	977878	692	692	108	Tandem	81.58	ALS	ALS	Portion	Portion
INTRA	137	ORF	ALS	MANY	6	977169	977878	6	974037	974746	710	710	3132	Tandem	81.74	ALS	ALS	Portion	Portion
INTRA	137	ORF	ALS	MANY	6	977169	977667	6	976521	977019	499	499	648	Tandem	84.63	ALS	ALS	Portion	Portion
INTRA	137	ORF	ALS	MANY	6	977175	977872	6	975015	975712	698	698	2160	Tandem	82.71	ALS	ALS	Portion	Portion
INTRA	137	ORF	ALS	MANY	6	977175	977908	6	976419	977152	734	734	756	Tandem	84.67	ALS	ALS	Portion	Portion
INTRA	137	ORF	ALS	MANY	6	977187	977866	6	900860	900181	680	680	77685	Tandem	82.55	ALS	ALS	Portion	Portion
INTRA	137	ORF	ALS	MANY	6	977187	977878	6	977079	977770	692	692	108	Tandem	81.58	ALS	ALS	Portion	Portion
INTRA	137	ORF	ALS	MANY	6	977218	977586	6	902665	902297	369	369	75289	Tandem	85.64	ALS	ALS	Portion	Portion
INTRA	137	ORF	ALS	MANY	6	977220	977320	6	973548	973648	101	101	3672	Tandem	94.06	ALS	ALS	Portion	Portion
INTRA	137	ORF	ALS	MANY	6	977320	977875	6	973756	974311	556	556	3564	Tandem	81.9	ALS	ALS	Portion	Portion
INTRA	137	ORF	ALS	MANY	6	977532	977872	6	975912	976252	341	341	1620	Tandem	83.63	ALS	ALS	Portion	Portion
INTER	106	Intergenic		6	6	986620	986935	R	1585646	1585333	316	314	NA	NA	98.73						LOH
INTRA	106	Intergenic		6	6	986621	986934	6	987483	987796	314	314	549	Tandem	100						LOH
INTER	106	LTR		6	6	986621	987109	2	1665235	1665722	489	488	NA	NA	98.77					Unannotated Retrotransposon (partial)
INTER	106	Retrotransposon		6	6	986621	986934	2	1669471	1669783	314	313	NA	NA	98.73					Unannotated LTR/Retrotransposon (partial)
INTER	106	Intergenic		6	6	986652	986934	7	608496	608778	283	283	NA	NA	96.11
INTER	106	LTR		6	6	987212	987797	2	1669200	1669784	586	585	NA	NA	98.63					Unannotated LTR/Retrotransposon (partial)
INTER	106	Intergenic		6	6	987483	987796	R	1585645	1585334	314	312	NA	NA	98.73
INTRA	106	Intergenic		6	6	987483	987796	6	986621	986934	314	314	1175	Tandem	100
INTER	106	Retrotransposon		6	6	987483	987796	2	1665235	1665547	314	313	NA	NA	98.73					Unannotated LTR/Retrotransposon (partial)
INTER	106	Intergenic		6	6	987514	987796	7	608496	608778	283	283	NA	NA	96.11					Unannotated Retrotransposon (partial)
INTER	75	tRNA		8	6	992928	993059	2	323524	323390	132	135	NA	NA	91.24
INTER	75	tRNA		8	6	992929	993058	R	1842032	1841903	130	130	NA	NA	95.38						LOH
INTER	75	tRNA		8	6	992932	993060	2	176044	175912	129	133	NA	NA	91.79
INTER	75	tRNA		8	6	992932	993054	R	10306	10424	123	119	NA	NA	92.68
INTRA	75	tRNA		8	6	992932	993072	6	6932	7065	141	134	986140	Tandem	91.49	tRNA (CAA)	tRNA (CAA)
INTRA	183	ORF		2	6	1023495	1024791	6	1025396	1026692	1297	1297	605	Tandem	82.62	Characterized orf19.2158 (NAG3)	Characterized orf19.2160 (NAG4)	Portion	Portion
INTRA	183	ORF		2	6	1025396	1026692	6	1023495	1024791	1297	1297	3197	Tandem	82.62	Characterized orf19.2160 (NAG4)	Characterized orf19.2158 (NAG3)	Portion	Portion
INTRA	166	ORF		2	6	1030302	1030637	6	3380	3076	336	305	1027561	Mirrored	87.8	Uncharacterized orf19.2163	Intergenic Region	Portion		Unannotated ORF (partial)
INTER	69	LTR		5	6	1032438	1032617	R	2036872	2036690	180	183	NA	NA	90.71					Unannotated LTR
INTER	69	LTR		5	6	1032438	1032627	4	1262877	1262687	190	191	NA	NA	94.24
INTER	69	LTR		5	6	1032438	1032627	1	3099226	3099035	190	192	NA	NA	93.75
INTER	69	LTR		5	6	1032438	1032627	5	167569	167376	190	194	NA	NA	92.78
INTRA	184	ORF	CSA1	MANY	7	11080	11426	7	12649	12995	347	347	1223	Tandem	93.08	Characterized orf19.7114 (CSA1)	Characterized orf19.7114 (CSA1)	Portion	Portion		LOH
INTRA	184	ORF	CSA1	MANY	7	11083	11483	7	12079	12479	401	401	596	Tandem	96.01	Characterized orf19.7114 (CSA1)	Characterized orf19.7114 (CSA1)	Portion	Portion
INTRA	184	ORF	CSA1	MANY	7	11963	12422	7	12536	12995	460	460	114	Tandem	95.22	Characterized orf19.7114 (CSA1)	Characterized orf19.7114 (CSA1)	Portion	Portion
INTRA	184	ORF	CSA1	MANY	7	12079	12479	7	11083	11483	401	401	1396	Tandem	96.01	Characterized orf19.7114 (CSA1)	Characterized orf19.7114 (CSA1)	Portion	Portion
INTRA	184	ORF	CSA1	MANY	7	12536	12995	7	11963	12422	460	460	1032	Tandem	95.22	Characterized orf19.7114 (CSA1)	Characterized orf19.7114 (CSA1)	Portion	Portion
INTRA	184	ORF	CSA1	MANY	7	12649	12995	7	11080	11426	347	347	1915	Tandem	93.08	Characterized orf19.7114 (CSA1)	Characterized orf19.7114 (CSA1)	Portion	Portion
INTER	76	Intergenic		5	7	185536	185793	4	761913	762168	258	256	NA	NA	88.42
INTER	76	Intergenic		5	7	185573	185784	3	296364	296575	212	212	NA	NA	91.08
INTER	90	LTR		6	7	256946	257326	4	357558	357933	381	376	NA	NA	96.33									Known
INTER	90	LTR		6	7	256950	257200	R	2258706	2258477	251	230	NA	NA	88.84					Unannotated LTR (partial)				Known
INTER	90	LTR		6	7	256950	257242	2	735248	734962	293	287	NA	NA	92.83									Known
INTER	90	LTR		6	7	256950	257321	4	1315845	1315472	372	374	NA	NA	96.79									Known
INTER	90	LTR		6	7	256982	257245	R	2154581	2154832	264	252	NA	NA	89.81									Known
INTRA	185	ORF		2	7	493784	494418	7	495421	496064	635	644	1003	Tandem	88.68	Characterized orf19.6486 (LDG3)	Uncharacterized orf19.6484	Single ORF	Single ORF
INTRA	185	ORF		2	7	495421	496064	7	493784	494418	644	635	2280	Tandem	88.68	Uncharacterized orf19.6484	Characterized orf19.6486 (LDG3)	Single ORF	Single ORF
INTER	82	ORF		2	7	519203	519574	2	461416	461793	372	378	NA	NA	80.79	orf19.6472	orf19.1552	Single ORF	Single ORF
INTRA	6	LTR		10	7	521437	521907	7	796246	796673	471	428	274339	Tandem	83.72	Eta-7b LTR	Intergenic Region			Unannotated LTR (partial)				Known
INTER	6	LTR		10	7	521437	521908	1	222183	222654	472	472	NA	NA	99.36									Known
INTER	6	LTR		10	7	521438	521807	1	363873	363503	370	371	NA	NA	94.88					Unannotated LTR (partial)	LOH			Known
INTRA	6	LTR		10	7	521438	521909	7	927044	927471	472	428	405135	Tandem	86.23	Eta-7b LTR	Intergenic Region			Unannotated LTR (partial)				Known
INTER	6	LTR		10	7	521438	521907	R	2182313	2182782	470	470	NA	NA	100									Known
INTER	6	LTR		10	7	521438	521907	5	360289	360758	470	470	NA	NA	95.96									Known
INTRA	6	LTR		10	7	521438	521907	7	528463	528932	470	470	6556	Tandem	100	Eta-7b LTR	Retrotransposon Tca11-7							Known
INTER	6	LTR		10	7	521438	521909	R	1924696	1924224	472	473	NA	NA	99.58									Known
INTER	6	LTR		10	7	521498	521656	1	1657318	1657494	159	177	NA	NA	85.88					Unannotated LTR (partial)				Known
INTER	48	Retrotransposon		2	7	527105	527907	1	1659460	1658648	803	813	NA	NA	92.5									Known
INTER	6	Retrotransposon		10	7	528459	528832	1	363878	363503	374	376	NA	NA	94.68					Unannotated Retrotransposon (partial)				Known
INTER	6	LTR		10	7	528463	528932	R	1924696	1924226	470	471	NA	NA	99.58									Known
INTER	6	LTR		10	7	528463	528932	1	222184	222653	470	470	NA	NA	99.36									Known
INTRA	6	LTR		10	7	528463	528932	7	521438	521907	470	470	7494	Tandem	100	Retrotransposon Tca11-7	Eta-7b LTR							Known
INTER	6	LTR		10	7	528463	528933	R	2182313	2182783	471	471	NA	NA	100									Known
INTER	6	LTR		10	7	528463	528934	5	360289	360760	472	472	NA	NA	95.97									Known
INTRA	6	Retrotransposon		10	7	528463	528929	7	927044	927466	467	423	398115	Tandem	86.3	Retrotransposon Tca11-7	Intergenic Region			Unannotated Retrotransposon (partial)				Known
INTRA	6	Retrotransposon		10	7	528469	528932	7	796253	796673	464	421	267321	Tandem	83.91	Retrotransposon Tca11-7	Intergenic Region			Unannotated Retrotransposon (partial)				Known
INTER	6	Retrotransposon		10	7	528523	528681	1	1657318	1657494	159	177	NA	NA	85.88					Unannotated Retrotransposon (partial)				Known
INTER	35	LTR		7	7	553916	554200	1	3187519	3187235	285	285	NA	NA	96.5									Known
INTRA	35	Retrotransposon		7	7	553916	554202	7	560056	560343	287	288	5854	Tandem	99.65	Retrotransposon Tca2-7	Retrotransposon Tca2-7							Known
INTER	35	LTR		7	7	553918	554254	1	3187872	3187536	337	337	NA	NA	99.41									Known
INTER	35	LTR		7	7	553921	554200	1	1055234	1054955	280	280	NA	NA	98.21									Known
INTER	35	LTR		7	7	553921	554200	2	1442734	1442454	280	281	NA	NA	96.09									Known
INTER	35	LTR		7	7	553921	554201	R	2150343	2150624	281	282	NA	NA	95.74									Known
INTER	73	ORF		5	7	555906	556584	1	3187870	3188548	679	679	NA	NA	99.85	Tca2-7	orf19.7278	Portion	Single ORF					Known
INTER	35	LTR		7	7	560041	560341	1	3187534	3187235	301	300	NA	NA	97.01									Known
INTRA	35	Retrotransposon		7	7	560056	560343	7	553916	554202	288	287	6427	Tandem	99.65	Retrotransposon Tca2-7	Retrotransposon Tca2-7							Known
INTER	35	LTR		7	7	560057	560343	1	3187874	3187588	287	287	NA	NA	98.95									Known
INTER	35	LTR		7	7	560062	560341	1	1055234	1054955	280	280	NA	NA	98.21									Known
INTER	35	LTR		7	7	560062	560341	2	1442734	1442454	280	281	NA	NA	96.09									Known
INTER	35	LTR		7	7	560062	560342	R	2150343	2150624	281	282	NA	NA	95.74									Known
INTER	37	LTR		13	7	591363	591609	6	889171	888927	247	245	NA	NA	89.07					Unannotated LTR (partial)
INTER	37	LTR		13	7	591366	591609	R	626195	625954	244	242	NA	NA	89.75					Unannotated LTR (partial)
INTER	37	LTR		13	7	591367	591609	1	2590792	2591032	243	241	NA	NA	89.71					Unannotated LTR (partial)
INTER	37	LTR		13	7	591367	591609	4	637137	637377	243	241	NA	NA	89.71					Unannotated LTR (partial)
INTER	37	LTR		13	7	591367	591609	4	1179178	1178938	243	241	NA	NA	89.71					Unannotated LTR (partial)
INTER	37	LTR		13	7	591367	591609	6	326018	325778	243	241	NA	NA	88.89					Unannotated LTR (partial)
INTER	37	LTR		13	7	591367	591609	R	1097846	1098086	243	241	NA	NA	89.3					Unannotated LTR (partial)
INTER	37	LTR		13	7	591374	591609	R	1971132	1971366	236	235	NA	NA	89.41					Unannotated LTR (partial)
INTER	176	LTR		2	7	606393	606600	6	557660	557453	208	208	NA	NA	92.79					Unannotated LTR (partial)
INTER	54	LTR		3	7	606600	606697	3	1273025	1273125	98	101	NA	NA	93.07					Unannotated LTR (partial)
INTER	175	LTR		2	7	606966	607117	6	557328	557176	152	153	NA	NA	92.16					Unannotated LTR (partial)
INTER	39	LTR		12	7	608220	608495	1	1292442	1292165	276	278	NA	NA	92.5									Known
INTRA	39	LTR		12	7	608221	608367	7	942365	942511	147	147	333998	Tandem	97.28	Rho-7a LTR	Intergenic Region			Unannotated LTR (partial)				Known
INTER	39	LTR		12	7	608221	608484	1	3186971	3187234	264	264	NA	NA	98.11									Known
INTER	39	LTR		12	7	608221	608495	2	4885	4611	275	275	NA	NA	98.55									Known
INTER	39	LTR		12	7	608221	608495	5	2534	2260	275	275	NA	NA	98.18									Known
INTER	39	LTR		12	7	608221	608495	3	14372	14098	275	275	NA	NA	97.82									Known
INTER	39	LTR		12	7	608221	608495	6	6182	5908	275	275	NA	NA	97.82									Known
INTER	39	LTR		12	7	608221	608495	3	1787606	1787880	275	275	NA	NA	97.09									Known
INTER	106	Intergenic		6	7	608496	608778	6	986652	986934	283	283	NA	NA	96.11
INTER	106	Intergenic		6	7	608496	608778	6	987514	987796	283	283	NA	NA	96.11
INTER	106	Intergenic		6	7	608496	608778	R	1585614	1585334	283	281	NA	NA	95.41
INTER	106	Retrotransposon		6	7	608496	608778	2	1669502	1669783	283	282	NA	NA	96.11					Unannotated Retrotransposon (partial)
INTER	106	Retrotransposon		6	7	608496	608778	2	1665266	1665547	283	282	NA	NA	95.76					Unannotated Retrotransposon (partial)
INTRA	186	ORF		2	7	609530	610821	7	727603	728895	1292	1293	116782	Tandem	88.49	Characterized orf19.5179 (LIP5)	Characterized orf19.1345 (LIP8)	Portion	Portion
INTRA	187	ORF		2	7	610009	610836	7	622701	623527	828	827	11865	Tandem	82.61	Characterized orf19.5179 (LIP5)	Characterized orf19.5172 (LIP9)	Portion	Portion
INTER	150	ORF		2	7	615453	616750	4	833086	834383	1298	1298	NA	NA	81.61	orf19.5177	orf19.1596	Portion	Portion
INTRA	187	ORF		2	7	622701	623527	7	610009	610836	827	828	13518	Tandem	82.61	Characterized orf19.5172 (LIP9)	Characterized orf19.5179 (LIP5)	Portion	Portion
INTER	3	ORF		2	7	630405	632254	1	60235	62084	1850	1850	NA	NA	84.99	orf19.5170.1	orf19.6070	Portion	Portion
INTER	43	LTR		14	7	674453	674930	5	500706	501183	478	478	NA	NA	93.53									Known
INTER	43	LTR		14	7	674456	674926	2	655415	654945	471	471	NA	NA	93.43									Known
INTER	43	LTR		14	7	674456	674927	R	1474281	1474752	472	472	NA	NA	87.74									Known
INTER	43	LTR		14	7	674457	674687	2	148241	148011	231	231	NA	NA	85.34					Unannotated LTR (partial)				Known
INTER	43	LTR		14	7	674457	674926	R	1968792	1968323	470	470	NA	NA	99.15									Known
INTER	43	LTR		14	7	674457	674926	2	1012886	1012417	470	470	NA	NA	93.84									Known
INTER	43	LTR		14	7	674457	674926	R	211055	210586	470	470	NA	NA	93.42									Known
INTER	43	LTR		14	7	674457	674926	R	215731	215262	470	470	NA	NA	93.42									Known
INTRA	43	LTR		14	7	674457	674926	7	779147	779616	470	470	104221	Tandem	98.72	Psi-7b LTR	Psi-7b LTR							Known
INTER	43	LTR		14	7	674596	674926	1	1293899	1294216	331	318	NA	NA	86.71					Unannotated LTR (partial)				Known
INTRA	43	LTR		14	7	674596	674930	7	942020	941688	335	333	266758	Mirrored	92.84	Psi-7b LTR	Intergenic Region			Unannotated LTR (partial)				Known
INTER	158	ORF		2	7	720312	720582	5	172149	171879	271	271	NA	NA	85.4	Intergenic Region	orf19.575		Portion	Unannotated ORF (partial)
INTRA	186	ORF		2	7	727603	728895	7	609530	610821	1293	1292	119365	Tandem	88.49	Characterized orf19.1345 (LIP8)	Characterized orf19.5179 (LIP5)	Portion	Portion
INTER	67	LTR		6	7	756020	756227	1	2887194	2887401	208	208	NA	NA	100									Known
INTER	67	LTR		6	7	756020	756229	3	1273025	1273234	210	210	NA	NA	98.57									Known
INTER	67	LTR		6	7	756087	756227	R	1968080	1967941	141	140	NA	NA	97.87					Unannotated LTR (partial)				Known
INTER	67	LTR		6	7	756139	756227	R	1883944	1883856	89	89	NA	NA	96.63					Unannotated LTR (partial)				Known
INTRA	188	ORF		3	7	762338	765910	7	817612	821184	3573	3573	51702	Tandem	96.28	Uncharacterized orf19.1330, Part of Uncharacterized orf19.6704	Uncharacterized orf19.6703, Uncharacterized orf19.5508	Multi ORF	Multi ORF
INTRA	188	ORF		3	7	765250	765910	7	794449	793789	661	661	27879	Inverted	90.83	Uncharacterized orf19.1330, Part of Uncharacterized orf19.6704	Uncharacterized orf19.6690	Portion	Portion
INTER	43	LTR		14	7	779146	779616	5	500709	501179	471	471	NA	NA	92.58									Known
INTER	43	LTR		14	7	779146	779616	R	215732	215262	471	471	NA	NA	92.16									Known
INTER	43	LTR		14	7	779146	779617	R	211056	210585	472	472	NA	NA	92.18									Known
INTER	43	LTR		14	7	779147	779617	R	1968792	1968322	471	471	NA	NA	98.73						LOH			Known
INTER	43	LTR		14	7	779147	779616	2	1012886	1012417	470	470	NA	NA	92.99									Known
INTER	43	LTR		14	7	779147	779616	2	655414	654945	470	470	NA	NA	92.14									Known
INTER	43	LTR		14	7	779147	779616	R	1474282	1474751	470	470	NA	NA	86.84									Known
INTRA	43	LTR		14	7	779147	779616	7	674457	674926	470	470	105159	Tandem	98.72	Psi-7b LTR	Psi-7a LTR							Known
INTER	43	LTR		14	7	779286	779617	1	1293899	1294217	332	319	NA	NA	86.14					Unannotated LTR (partial)				Known
INTRA	43	LTR		14	7	779286	779617	7	942020	941691	332	330	162074	Mirrored	92.47	Psi-7b LTR	Intergenic Region			Unannotated LTR (partial)				Known
INTRA	188	ORF		3	7	793781	794449	7	821192	820524	669	669	26075	Inverted	92.99	Uncharacterized orf19.6690	Uncharacterized orf19.5508	Single ORF	Single ORF
INTRA	188	ORF		3	7	793789	794449	7	765910	765250	661	661	29199	Inverted	90.83	Uncharacterized orf19.6690	Uncharacterized orf19.6703, Uncharacterized orf19.5508	Portion	Single ORF			CNV
INTER	189	ORF		2	7	793957	794742	R	1332689	1331904	786	786	NA	NA	89.97	orf19.6690	orf19.3878	Portion	Portion
INTER	190	ORF		2	7	794987	795820	R	1331659	1330823	834	837	NA	NA	84.51	orf19.6690	orf19.6690	Portion	Portion
INTRA	6	LTR		10	7	796246	796673	7	521437	521907	428	471	275236	Tandem	83.72	Intergenic Region	Eta-7b LTR			Unannotated LTR
INTER	6	LTR		10	7	796246	796673	1	222183	222653	428	471	NA	NA	83.09
INTER	6	LTR		10	7	796253	796673	R	1924690	1924226	421	465	NA	NA	83.48					Unannotated LTR
INTER	6	LTR		10	7	796253	796673	R	2182319	2182782	421	464	NA	NA	83.91					Unannotated LTR
INTRA	6	Retrotransposon		10	7	796253	796673	7	528469	528932	421	464	268204	Tandem	83.91	Intergenic Region	Retrotransposon Tca11-7			Unannotated Retrotransposon (partial)
INTRA	6	Intergenic		10	7	796266	796670	7	927063	927466	405	404	130393	Tandem	89.88
INTER	6	Intergenic		10	7	796324	796667	1	1657336	1657714	344	379	NA	NA	83.64
INTER	6	LTR		10	7	796465	796673	5	360550	360758	209	209	NA	NA	92.82					Unannotated LTR (partial)
INTRA	188	ORF		3	7	817612	821184	7	762338	765910	3573	3573	58846	Tandem	96.28	Uncharacterized orf19.6703, Uncharacterized orf19.5508	Uncharacterized orf19.1330, Part of Uncharacterized orf19.6704	Multi ORF	Multi ORF
INTRA	188	ORF		3	7	820524	821192	7	794449	793781	669	669	27411	Inverted	92.99	Uncharacterized orf19.5508	Uncharacterized orf19.6690	Single ORF	Portion
INTER	191	LTR		2	7	835138	835918	R	1109282	1110062	781	781	NA	NA	99.36									Known
INTER	20	tRNA		5	7	865896	866021	1	748290	748415	126	126	NA	NA	100
INTER	20	tRNA		5	7	865896	866021	1	1489663	1489788	126	126	NA	NA	97.62
INTER	20	tRNA		5	7	865896	866026	2	216920	217050	131	131	NA	NA	97.71
INTER	20	tRNA		5	7	865896	866027	R	339487	339618	132	132	NA	NA	98.48
INTER	44	Intergenic		2	7	912785	912996	1	1335349	1335138	212	212	NA	NA	94.34
INTER	6	Intergenic		10	7	927042	927262	1	363875	363655	221	221	NA	NA	95.48
INTER	6	LTR		10	7	927044	927470	1	222184	222654	427	471	NA	NA	85.56					Unannotated LTR
INTRA	6	LTR		10	7	927044	927471	7	521438	521909	428	472	406033	Tandem	86.23	Intergenic Region	Eta-7b LTR			Unannotated LTR
INTER	6	LTR		10	7	927044	927486	R	1924696	1924209	443	488	NA	NA	85.48					Unannotated LTR
INTER	6	LTR		10	7	927044	927466	R	2182313	2182779	423	467	NA	NA	86.3					Unannotated LTR
INTER	6	LTR		10	7	927044	927262	5	360289	360507	219	219	NA	NA	94.52					Unannotated LTR (partial)
INTRA	6	Retrotransposon		10	7	927044	927466	7	528463	528929	423	467	399003	Tandem	86.3	Intergenic Region	Retrotransposon Tca11-7			Unannotated Retrotransposon (partial)
INTRA	6	Intergenic		10	7	927063	927466	7	796266	796670	404	405	131200	Tandem	89.88
INTER	192	Intergenic		2	7	927877	928049	R	2203471	2203299	173	173	NA	NA	93.64
INTER	43	LTR		14	7	941688	942020	5	501183	500849	333	335	NA	NA	93.13					Unannotated LTR (partial)
INTRA	43	LTR		14	7	941688	942020	7	674930	674596	333	335	267424	Mirrored	92.84	Intergenic Region	Psi-7b LTR			Unannotated LTR (partial)
INTER	42	ORF		9	7	941689	942353	1	1294219	1293569	665	651	NA	NA	92.05			Single ORF	Single ORF
INTER	43	LTR		14	7	941689	942020	R	210583	210916	332	334	NA	NA	93.11					Unannotated ORF/LTR (partial)
INTER	43	LTR		14	7	941689	942020	R	1968320	1968653	332	334	NA	NA	92.81
INTRA	43	LTR		14	7	941691	942020	7	779617	779286	330	332	162734	Mirrored	92.47	Intergenic Region	Psi-7b LTR			Unannotated LTR (partial)
INTER	43	LTR		14	7	941692	942020	2	654945	655275	329	331	NA	NA	93.05					Unannotated LTR (partial)
INTER	43	LTR		14	7	941692	942020	2	1012417	1012747	329	331	NA	NA	93.05					Unannotated LTR (partial)
INTER	43	LTR		14	7	941692	942020	R	1474751	1474421	329	331	NA	NA	92.15					Unannotated LTR (partial)
INTER	43	Retrotransposon		14	7	941692	942020	R	215262	215592	329	331	NA	NA	93.05					Unannotated Retrotransposon (partial)
INTER	39	LTR		12	7	942365	942511	1	1292441	1292295	147	147	NA	NA	95.27					Unannotated LTR (partial)				Known
INTRA	39	LTR		12	7	942365	942511	7	608221	608367	147	147	334290	Tandem	97.28	Intergenic Region	Rho-7a LTR			Unannotated LTR (partial)				Known
INTER	72	LTR		5	7	942511	942729	R	544587	544370	219	218	NA	NA	94.06					Unannotated LTR (partial)				Known
INTER	72	LTR		5	7	942511	942891	4	673952	674332	381	381	NA	NA	99.74									Known
INTER	72	LTR		5	7	942511	942891	4	680467	680847	381	381	NA	NA	99.74									Known
INTER	33	LTR		10	7	943607	943823	1	1021557	1021332	217	226	NA	NA	89.38					Unannotated LTR (partial)
INTER	33	LTR		10	7	949418	949544	1	1021320	1021447	127	128	NA	NA	93.75					Unannotated LTR (partial)
INTER	89	Intergenic		2	7	949545	949616	2	627994	627923	72	72	NA	NA	98.61
INTER	33	LTR		10	R	4208	4328	1	1021320	1021440	121	121	NA	NA	94.21					Unannotated LTR (partial)
INTER	170	Intergenic		2	R	4350	4579	6	174223	173994	230	230	NA	NA	94.35
INTER	162	ORF		2	R	5347	5962	5	515996	515381	616	616	NA	NA	91.88	orf19.7545	orf19.4241	Portion	Single ORF
INTRA	41	ORF		3	R	9072	9863	R	2286389	2285529	792	861	2275666	Inverted	80.4	TLO1	Characterized orf19.7680 (CTA26)	Single ORF	Single ORF
INTER	75	tRNA		8	R	10306	10424	6	992932	993054	119	123	NA	NA	92.68
INTRA	75	tRNA		8	R	10308	10424	R	1842027	1841907	117	121	1831483	Mirrored	88.43	tRNA (CAA)	tRNA (CAA)
INTER	167	ORF		2	R	11025	11626	6	7823	8424	602	602	NA	NA	98.34	orf19.7539.1	orf19.6336	Portion	Portion
INTER	59	ORF		2	R	30694	30889	1	2340393	2340594	196	202	NA	NA	91.13	orf19.7523	orf19.1005	Portion	Portion		LOH
INTER	62	ORF		2	R	67845	69026	1	2573814	2572630	1182	1185	NA	NA	90.89	orf19.7506	orf19.1143	Single ORF	Single ORF
INTRA	193	Retrotransposon		2	R	116264	116545	R	1129036	1129315	282	280	1012491	Tandem	91.52	Intergenic Region	Retrotransposon Zorro3-R			Unannotated Retrotransposon (partial)
INTRA	194	ORF		2	R	116781	118219	R	1132201	1130753	1439	1449	1012534	Inverted	94	Uncharacterized orf19.7487	Retrotransposon Zorro3-R	Single ORF
INTER	1	tRNA		4	R	172433	172512	1	42093	42173	80	81	NA	NA	98.77
INTER	1	tRNA		4	R	172433	172514	1	1168970	1168888	82	83	NA	NA	98.8
INTER	1	tRNA		4	R	172439	172514	2	1042591	1042516	76	76	NA	NA	100
INTER	16	ORF		2	R	193851	194303	1	507777	508229	453	453	NA	NA	83.92	orf19.3269	orf19.2929	Portion	Portion
INTER	43	LTR		14	R	210579	210916	1	1294223	1293899	338	325	NA	NA	86.98					Unannotated ORF/LTR (partial)				Known
INTER	43	LTR		14	R	210583	210916	7	941689	942020	334	332	NA	NA	93.11					Unannotated ORF/LTR (partial)				Known
INTRA	43	LTR		14	R	210583	211055	R	1968320	1968792	473	473	1757265	Tandem	93.04	Psi-Rb LTR, Part of Characterized orf19.3262 (ATO10)	Psi-Rc LTR							Known
INTER	43	LTR		14	R	210585	211055	4	1260538	1260998	471	461	NA	NA	87.5					Unannotated ORF/LTR (partial)				Known
INTER	43	LTR		14	R	210585	211056	7	779617	779146	472	472	NA	NA	92.18									Known
INTER	43	LTR		14	R	210586	211055	2	654945	655414	470	470	NA	NA	100									Known
INTER	43	LTR		14	R	210586	211055	2	1012417	1012886	470	470	NA	NA	95.15									Known
INTER	43	LTR		14	R	210586	211055	7	674926	674457	470	470	NA	NA	93.42									Known
INTER	43	LTR		14	R	210586	211056	5	501179	500709	471	471	NA	NA	99.15									Known
INTRA	43	LTR		14	R	210586	211055	R	1474751	1474282	470	470	1263227	Inverted	92.98	Psi-Rb LTR, Part of Characterized orf19.3262 (ATO10)	Psi-Rd LTR							Known
INTRA	43	LTR		14	R	210586	211056	R	215262	215732	471	471	4206	Tandem	100	Psi-Rb LTR, Part of Characterized orf19.3262 (ATO10)	Retrotransposon TCA9-R, Part of Characterized orf19.3261 (ATO9)							Known
INTRA	43	LTR		14	R	210606	211055	R	2243231	2243670	450	440	2032176	Tandem	85.11	Psi-Rb LTR, Part of Characterized orf19.3262 (ATO10)	Intergenic Region			Unannotated ORF/LTR (partial)				Known
INTER	43	LTR		14	R	210825	211055	2	148011	148241	231	231	NA	NA	96.54					Unannotated LTR (partial)				Known
INTRA	43	LTR		14	R	215256	215731	R	1968318	1968792	476	475	1752587	Tandem	92.87	Retrotransposon TCA9-R, Part of Characterized orf19.3261 (ATO9)	Psi-Rc LTR							Known
INTER	43	LTR		14	R	215261	215732	5	501180	500709	472	472	NA	NA	99.15									Known
INTER	43	LTR		14	R	215262	215731	2	654945	655414	470	470	NA	NA	100									Known
INTER	43	LTR		14	R	215262	215731	2	1012417	1012886	470	470	NA	NA	99.15									Known
INTER	43	LTR		14	R	215262	215731	7	674926	674457	470	470	NA	NA	93.42									Known
INTER	43	LTR		14	R	215262	215732	7	779616	779146	471	471	NA	NA	92.16									Known
INTRA	43	LTR		14	R	215262	215731	R	1474751	1474282	470	470	1258551	Inverted	92.98	Retrotransposon TCA9-R, Part of Characterized orf19.3261 (ATO9)	Psi-Rd LTR							Known
INTRA	43	LTR		14	R	215262	215732	R	210586	211056	471	471	5146	Tandem	100	Retrotransposon TCA9-R, Part of Characterized orf19.3261 (ATO9)	Psi-Rb LTR, Part of Characterized orf19.3262 (ATO10)							Known
INTER	43	Retrotransposon		14	R	215262	215731	4	1260539	1260998	470	460	NA	NA	87.47					Unannotated ORF/Retrotransposon (partial)				Known
INTER	43	Retrotransposon		14	R	215262	215592	7	941692	942020	331	329	NA	NA	93.05					Unannotated Retrotransposon (partial)				Known
INTER	43	Retrotransposon		14	R	215262	215592	1	1294216	1293899	331	318	NA	NA	86.71					Unannotated Retrotransposon (partial)				Known
INTRA	43	Retrotransposon		14	R	215282	215731	R	2243231	2243670	450	440	2027500	Tandem	85.11	Retrotransposon TCA9-R, Part of Characterized orf19.3261 (ATO9)	Intergenic Region			Unannotated ORF/Retrotransposon (partial)				Known
INTER	43	Retrotransposon		14	R	215501	215731	2	148011	148241	231	231	NA	NA	96.54					Unannotated ORF/Retrotransposon (partial)				Known
INTER	88	ORF		2	R	277558	278736	2	576541	575363	1179	1179	NA	NA	82.22	orf19.3234	orf19.5816	Single ORF	Single ORF		LOH
INTRA	195	ORF		2	R	319096	319330	R	1519251	1519018	235	234	1199688	Inverted	88.98	Characterized orf19.3221 (CPA2)	Characterized orf19.2360 (URA2)	Portion	Portion
INTER	20	tRNA		5	R	339487	339612	1	748290	748415	126	126	NA	NA	99.21
INTER	20	tRNA		5	R	339487	339612	1	1489663	1489788	126	126	NA	NA	98.41
INTER	20	tRNA		5	R	339487	339618	7	865896	866027	132	132	NA	NA	98.48
INTER	20	tRNA		5	R	339487	339626	2	216920	217059	140	140	NA	NA	97.14
INTRA	196	ORF		2	R	417401	417605	R	442161	441957	205	205	24352	Inverted	97.56	Pseudogene orf19.2583	Characterized orf19.2602 (OPT1)	Multi ORF	Portion
INTRA	197	ORF		2	R	417606	417899	R	441651	441944	294	294	23752	Tandem	96.6	Pseudogene orf19.2583	Characterized orf19.2602 (OPT1)	Multi ORF	Portion
INTRA	198	LTR		2	R	417986	419334	R	441611	440267	1349	1345	20933	Inverted	99.11	Pseudogene orf19.2584 (OPT9), Uncharacterized orf19.2585	Characterized orf19.2602 (OPT1), Nu-Rb LTR							Known
INTRA	199	ORF		2	R	419435	419963	R	439466	440003	529	538	19503	Tandem	89.81	Part of Uncharacterized orf19.2585, Intergenic Region	Intergenic Region	Portion		Unannotated ORF (partial)
INTRA	200	LTR		2	R	420347	420725	R	1999232	1998847	379	386	1578122	Inverted	90.7	Intergenic Region	Xi-Ra LTR							Known
INTER	13	LTR		6	R	426955	427339	1	403876	404261	385	386	NA	NA	91.21									Known
INTER	13	LTR		6	R	426955	427340	2	1887311	1886925	386	387	NA	NA	91.49									Known
INTRA	13	LTR		6	R	426955	427339	R	2244070	2243684	385	387	1816345	Inverted	91.75	Alpha-Rc LTR	Alpha-Ra LTR							Known
INTRA	13	LTR		6	R	426955	427349	R	961849	961454	395	396	534105	Inverted	91.46	Alpha-Rc LTR	Alpha-Rb LTR							Known
INTER	13	LTR		6	R	426962	427237	5	192737	193013	276	277	NA	NA	84.48					Unannotated LTR (partial)				Known
INTRA	199	ORF		2	R	439466	440003	R	419435	419963	538	529	20568	Tandem	89.81	Intergenic Region	Part of Uncharacterized orf19.2585, Intergenic Region		Portion	Unannotated ORF (partial)
INTRA	198	LTR		2	R	440267	441611	R	419334	417986	1345	1349	23625	Inverted	99.11	Characterized orf19.2602 (OPT1), Nu-Rb LTR	Pseudogene orf19.2584 (OPT9), Uncharacterized orf19.2585							Known
INTRA	197	ORF		2	R	441651	441944	R	417606	417899	294	294	24338	Tandem	96.6	Characterized orf19.2602 (OPT1)	Pseudogene orf19.2583	Portion	Multi ORF
INTRA	196	ORF		2	R	441957	442161	R	417605	417401	205	205	24760	Inverted	97.56	Characterized orf19.2602 (OPT1)	Pseudogene orf19.2583	Portion	Multi ORF
INTER	46	tRNA		2	R	456550	456689	1	1570180	1570041	140	140	NA	NA	98.57
INTRA	201	ORF		2	R	478042	479419	R	533720	535097	1378	1378	54301	Tandem	93.76	Characterized orf19.2619 (PHO113)	Characterized orf19.3727 (PHO112)	Single ORF	Single ORF			CNV
INTRA	202	ORF		3	R	493904	496584	R	499916	502597	2681	2682	3332	Tandem	88.26	Characterized orf19.3749 (IFC3)	Characterized orf19.3746 (IFC1)	Single ORF	Single ORF
INTRA	202	ORF		3	R	493906	496569	R	552007	549347	2664	2661	52778	Inverted	86.89	Characterized orf19.3749 (IFC3)	Characterized orf19.176 (OPT4)	Single ORF	Single ORF
INTRA	203	ORF		2	R	493908	494656	R	661920	661180	749	741	166524	Inverted	81.14	Characterized orf19.3749 (IFC3)	Pseudogene orf19.2847.1	Portion	Single ORF
INTRA	202	ORF		3	R	499916	502597	R	493904	496584	2682	2681	8693	Tandem	88.26	Characterized orf19.3746 (IFC1)	Characterized orf19.3749 (IFC3)	Single ORF	Single ORF
INTRA	204	ORF		2	R	499918	500428	R	552007	551497	511	511	51069	Inverted	85.16	Characterized orf19.3746 (IFC1)	Characterized orf19.176 (OPT4)	Portion	Portion
INTRA	205	ORF		2	R	500484	500674	R	661364	661174	191	191	160500	Inverted	84.29	Characterized orf19.3746 (IFC1)	Pseudogene orf19.2847.1	Portion	Portion
INTRA	206	ORF		2	R	500559	502588	R	551369	549340	2030	2030	46752	Inverted	85.8	Characterized orf19.3746 (IFC1)	Characterized orf19.176 (OPT4)	Portion	Portion
INTER	83	tRNA		5	R	515742	515824	3	408042	408124	83	83	NA	NA	100
INTER	83	tRNA		5	R	515742	515824	3	1232593	1232675	83	83	NA	NA	98.8
INTRA	83	tRNA		5	R	515742	515826	R	1233342	1233258	85	85	717432	Inverted	98.82	tRNA (AAC)	tRNA (AAC)
INTER	83	tRNA		5	R	515749	515824	2	496270	496195	76	76	NA	NA	100
INTER	99	ORF		2	R	526290	526772	2	1205036	1204554	483	483	NA	NA	81.28	orf19.3733	orf19.5211	Portion	Portion
INTRA	201	ORF		2	R	533720	535097	R	478042	479419	1378	1378	57055	Tandem	93.76	Characterized orf19.3727 (PHO112)	Characterized orf19.2619 (PHO113)	Single ORF	Single ORF			CNV
INTER	7	LTR		8	R	543909	544165	4	207817	207560	257	258	NA	NA	91.86									Known
INTER	7	LTR		8	R	543914	544166	5	306611	306864	253	254	NA	NA	92.52									Known
INTER	7	LTR		8	R	543915	544162	1	248453	248206	248	248	NA	NA	93.95									Known
INTER	7	LTR		8	R	543916	544163	1	2516416	2516664	248	249	NA	NA	92.37									Known
INTER	7	LTR		8	R	543916	544163	5	1172005	1171757	248	249	NA	NA	92.37									Known
INTER	7	LTR		8	R	543917	544163	2	969358	969608	247	251	NA	NA	91.24									Known
INTER	7	LTR		8	R	544042	544163	3	296006	296127	122	122	NA	NA	96.72					Unannotated LTR (partial)				Known
INTER	165	LTR		2	R	544163	544370	5	812688	812481	208	208	NA	NA	94.71					Unannotated LTR (partial)
INTER	72	LTR		5	R	544370	544587	1	3178619	3178401	218	219	NA	NA	93.61					Unannotated LTR (partial)
INTER	72	LTR		5	R	544370	544587	7	942729	942511	218	219	NA	NA	94.06					Unannotated LTR (partial)
INTER	72	Retrotransposon		5	R	544370	544587	4	674170	673952	218	219	NA	NA	94.06					Unannotated Retrotransposon (partial)
INTER	72	Retrotransposon		5	R	544370	544587	4	680685	680467	218	219	NA	NA	94.06					Unannotated Retrotransposon (partial)
INTRA	206	ORF		2	R	549340	551369	R	502588	500559	2030	2030	50810	Inverted	85.8	Characterized orf19.176 (OPT4)	Characterized orf19.3746 (IFC1)	Portion	Portion
INTRA	202	ORF		3	R	549347	552007	R	496569	493906	2661	2664	58101	Inverted	86.89	Characterized orf19.176 (OPT4)	Characterized orf19.3749 (IFC3)	Single ORF	Single ORF
INTER	107	ORF		2	R	550806	551910	2	1686854	1685750	1105	1105	NA	NA	80.34	orf19.176	orf19.5121	Single ORF	Portion
INTRA	207	ORF		2	R	551225	552005	R	661145	661920	781	776	109140	Tandem	82.76	Characterized orf19.176 (OPT4)	Pseudogene orf19.2847.1	Portion	Portion
INTRA	204	ORF		2	R	551497	552007	R	500428	499918	511	511	52089	Inverted	85.16	Characterized orf19.176 (OPT4)	Characterized orf19.3746 (IFC1)	Portion	Portion
INTER	50	LTR		7	R	611613	611816	1	1815530	1815333	204	198	NA	NA	91.18					Unannotated LTR (partial)
INTER	50	LTR		7	R	611613	611816	2	1416907	1417103	204	197	NA	NA	91.18					Unannotated LTR (partial)
INTRA	50	Intergenic		7	R	611614	611789	R	2203130	2203300	176	171	1591341	Tandem	92.61
INTRA	50	LTR		7	R	611614	611816	R	1968075	1968272	203	198	1356259	Tandem	92.61	Intergenic Region	Pi-Rb LTR			Unannotated LTR (partial)
INTRA	50	LTR		7	R	611617	611816	R	1947579	1947386	200	194	1335570	Inverted	91.5	Intergenic Region	Pi-Ra LTR			Unannotated LTR (partial)
INTER	37	LTR		13	R	625679	626195	3	822252	822760	517	509	NA	NA	90.73									Known
INTER	37	LTR		13	R	625686	626099	1	1291703	1291288	414	416	NA	NA	93.51					Unannotated LTR (partial)				Known
INTER	37	LTR		13	R	625686	626010	2	2169042	2168718	325	325	NA	NA	93.85									Known
INTER	37	LTR		13	R	625686	626194	6	325509	326018	509	510	NA	NA	98.04									Known
INTER	37	LTR		13	R	625687	626194	1	2591299	2590792	508	508	NA	NA	99.41									Known
INTER	37	LTR		13	R	625687	626194	4	637644	637137	508	508	NA	NA	99.41									Known
INTER	37	LTR		13	R	625687	626194	4	1178670	1179178	508	509	NA	NA	99.41									Known
INTER	37	LTR		13	R	625687	626194	6	888660	889167	508	508	NA	NA	99.41									Known
INTRA	37	LTR		13	R	625687	626194	R	1971633	1971126	508	508	1344932	Inverted	98.82	Zeta-Rb LTR	Zeta-Rc LTR							Known
INTRA	37	LTR		13	R	625687	626194	R	1098353	1097846	508	508	471652	Inverted	99.41	Zeta-Rb LTR	Zeta-Ra LTR							Known
INTER	37	LTR		13	R	625954	626195	7	591609	591366	242	244	NA	NA	89.75					Unannotated LTR (partial)				Known
INTER	37	LTR		13	R	626118	626194	2	2168716	2168640	77	77	NA	NA	100									Known
INTER	140	ORF		2	R	633493	634424	3	1601892	1600958	932	935	NA	NA	83.69	orf19.2834	orf19.6801	Portion	Portion
INTRA	207	ORF		2	R	661145	661920	R	551225	552005	776	781	110695	Tandem	82.76	Pseudogene orf19.2847.1	Characterized orf19.176 (OPT4)	Portion	Portion
INTRA	205	ORF		2	R	661174	661364	R	500674	500484	191	191	160880	Inverted	84.29	Pseudogene orf19.2847.1	Characterized orf19.3746 (IFC1)	Portion	Portion
INTRA	203	ORF		2	R	661180	661920	R	494656	493908	741	749	168012	Inverted	81.14	Pseudogene orf19.2847.1	Characterized orf19.3749 (IFC3)	Portion	Single ORF
INTRA	208	ORF		2	R	760098	764081	R	795420	791439	3984	3982	27358	Inverted	99.52	Part of orf19.2378, Uncharacterized orf19.2376, orf19.4384 (HXT5)	Uncharacterized orf19.4384, Large Intergenic Region	Multi ORF	Single ORF
INTRA	208	ORF		2	R	791439	795420	R	764081	760098	3982	3984	35322	Inverted	99.52	Uncharacterized orf19.4384, Large Intergenic Region	Part of orf19.2378, Uncharacterized orf19.2376, orf19.4384 (HXT5)	Single ORF	Multi ORF		LOH
INTRA	209	ORF		2	R	801089	803821	R	852105	849374	2733	2732	45553	Inverted	97.7	Uncharacterized orf19.4380.1	orf19.4379 (PRP13)	Single ORF	Single ORF
INTRA	210	ORF		2	R	803975	807682	R	865667	869374	3708	3708	57985	Tandem	98.41	Characterized orf19.4361 (IFF3)	Characterized orf19.465 (IFF9)	Single ORF	Single ORF
INTRA	209	ORF		2	R	849374	852105	R	803821	801089	2732	2733	51016	Inverted	97.7	of19.4379 (PRP13)	Uncharacterized orf19.4380.1	Single ORF	Single ORF
INTRA	210	ORF		2	R	865667	869374	R	803975	807682	3708	3708	65399	Tandem	98.41	Characterized orf19.465 (IFF9)	Characterized orf19.4361 (IFF3)	Single ORF	Single ORF
INTRA	13	LTR		6	R	961454	961849	R	427349	426955	396	395	534894	Inverted	91.46	Alpha-Rb LTR	Alpha-Rc LTR							Known
INTER	13	LTR		6	R	961463	961851	2	1886925	1887313	389	389	NA	NA	98.71									Known
INTER	13	LTR		6	R	961464	961852	1	404261	403873	389	389	NA	NA	98.46									Known
INTRA	13	LTR		6	R	961464	961852	R	2243684	2244073	389	390	1281832	Tandem	98.97	Alpha-Rb LTR	Alpha-Ra LTR							Known
INTER	13	LTR		6	R	961587	961845	5	192994	192734	259	261	NA	NA	86.59					Unannotated LTR (partial)				Known
INTRA	211	tRNA		2	R	1020004	1020133	R	1020212	1020341	130	130	79	Tandem	90.84	tRNA (GCU)	tRNA (GCU)
INTRA	211	tRNA		2	R	1020212	1020341	R	1020004	1020133	130	130	337	Tandem	90.84	tRNA (GCU)	tRNA (GCU)
INTRA	212	ORF		2	R	1079617	1081321	R	1123386	1121674	1705	1713	40353	Inverted	98.19	Uncharacterized orf19.654	Uncharacterized orf19.555	Single ORF	Single ORF
INTER	37	LTR		13	R	1097845	1098353	6	326019	325510	509	510	NA	NA	98.04									Known
INTER	37	LTR		13	R	1097846	1098086	7	591367	591609	241	243	NA	NA	89.3					Unannotated LTR (partial)				Known
INTER	37	LTR		13	R	1097846	1097922	2	2168640	2168716	77	77	NA	NA	100									Known
INTER	37	LTR		13	R	1097846	1098353	1	2590792	2591299	508	508	NA	NA	99.61									Known
INTER	37	LTR		13	R	1097846	1098353	4	637137	637644	508	508	NA	NA	99.61									Known
INTER	37	LTR		13	R	1097846	1098353	4	1179178	1178670	508	509	NA	NA	99.61									Known
INTER	37	LTR		13	R	1097846	1098353	6	889167	888660	508	508	NA	NA	99.61									Known
INTER	37	LTR		13	R	1097846	1098353	3	822759	822260	508	500	NA	NA	91.16									Known
INTRA	37	LTR		13	R	1097846	1098353	R	626194	625687	508	508	472666	Inverted	99.41	Zeta-Ra LTR	Zeta-Rb LTR							Known
INTRA	37	LTR		13	R	1097846	1098354	R	1971126	1971634	509	509	872772	Tandem	99.02	Zeta-Ra LTR	Zeta-Rc LTR							Known
INTER	37	LTR		13	R	1097942	1098347	1	1291289	1291696	406	408	NA	NA	94.36					Unannotated LTR (partial)				Known
INTER	37	LTR		13	R	1098030	1098347	2	2168718	2169035	318	318	NA	NA	94.97									Known
INTER	138	tRNA		2	R	1098961	1099077	3	1469723	1469609	117	115	NA	NA	95.73
INTER	191	LTR		2	R	1109282	1110062	7	835138	835918	781	781	NA	NA	99.36									Known
INTER	116	ORF		3	R	1117090	1118222	2	2065992	2064857	1133	1136	NA	NA	88.64	orf19.638	orf19.1774	Single ORF	Single ORF
INTER	116	ORF		3	R	1117090	1118234	5	833965	835107	1145	1143	NA	NA	87.07	orf19.638	orf19.1117	Single ORF	Single ORF
INTRA	212	ORF		2	R	1121674	1123386	R	1081321	1079617	1713	1705	43769	Inverted	98.19	Uncharacterized orf19.555	Uncharacterized orf19.654	Single ORF	Single ORF
INTER	23	ORF		3	R	1122588	1123016	1	824237	824677	429	441	NA	NA	88.24	orf19.555	orf19.4463	Portion	Portion
INTRA	193	Retrotransposon		2	R	1129036	1129315	R	116264	116545	280	282	1013051	Tandem	91.52	Retrotransposon Zorro3-R	Intergenic Region			Unannotated Retrotransposon (partial)				Known
INTRA	194	ORF		2	R	1130753	1132201	R	118219	116781	1449	1439	1015420	Inverted	94	Retrotransposon Zorro3-R	Uncharacterized orf19.7487		Single ORF
INTRA	213	tRNA		2	R	1158902	1158997	R	1159028	1159121	96	94	31	Tandem	91.67	tRNA (ACG)	tRNA (ACG)
INTRA	213	tRNA		2	R	1159028	1159121	R	1158902	1158997	94	96	219	Tandem	91.67	tRNA (ACG)	tRNA (ACG)
INTER	23	ORF		3	R	1161187	1161558	4	124482	124858	372	377	NA	NA	84.66	orf19.555	orf19.4170	Portion	Portion
INTRA	214	tRNA		2	R	1229519	1229609	R	1230106	1230196	91	91	497	Tandem	89.36	tRNA (UGG)	tRNA (UGG)
INTER	4	tRNA		4	R	1230095	1230196	1	1116207	1116103	102	105	NA	NA	93.33
INTER	4	tRNA		4	R	1230095	1230198	1	126623	126519	104	105	NA	NA	94.29
INTER	4	tRNA		4	R	1230097	1230198	2	1888232	1888130	102	103	NA	NA	94.17
INTRA	214	tRNA		2	R	1230106	1230196	R	1229519	1229609	91	91	677	Tandem	89.36	tRNA (UGG)	tRNA (UGG)
INTER	83	tRNA		5	R	1233248	1233335	2	496184	496270	88	87	NA	NA	95.45
INTER	83	tRNA		5	R	1233256	1233338	3	1232767	1232686	83	82	NA	NA	97.59
INTER	83	tRNA		5	R	1233256	1233342	3	408128	408042	87	87	NA	NA	97.7
INTRA	83	tRNA		5	R	1233258	1233342	R	515826	515742	85	85	717600	Inverted	98.82	tRNA (AAC)	tRNA (AAC)
INTER	83	tRNA		5	R	1233260	1233342	3	1232675	1232593	83	83	NA	NA	97.59
INTER	12	tRNA		7	R	1234647	1234738	2	1144021	1143930	92	92	NA	NA	100
INTRA	12	tRNA		7	R	1234647	1234739	R	1474204	1474112	93	93	239373	Inverted	100	tRNA (AGA)	tRNA (AGA)
INTRA	12	tRNA		7	R	1234648	1234738	R	1243842	1243752	91	91	9014	Inverted	100	tRNA (AGA)	tRNA (AGA)
INTER	12	tRNA		7	R	1243751	1243842	2	1143929	1144020	92	92	NA	NA	100
INTRA	12	tRNA		7	R	1243752	1243842	R	1474113	1474203	91	91	230271	Tandem	100	tRNA (AGA)	tRNA (AGA)
INTRA	12	tRNA		7	R	1243752	1243842	R	1234738	1234648	91	91	9194	Inverted	100	tRNA (AGA)	tRNA (AGA)
INTER	190	ORF		2	R	1330823	1331659	7	795820	794987	837	834	NA	NA	84.51	orf19.6690	orf19.6690	Portion	Portion
INTER	189	ORF		2	R	1331904	1332689	7	794742	793957	786	786	NA	NA	89.97	orf19.3878	orf19.6690	Portion	Portion
INTRA	215	ORF		2	R	1429475	1431352	R	1459272	1457404	1878	1869	26052	Inverted	93.26	Characterized orf19.700 (SEO1)	Uncharacterized orf19.1855	Single ORF	Single ORF
INTRA	215	ORF		2	R	1457404	1459272	R	1431352	1429475	1869	1878	29797	Inverted	93.26	Uncharacterized orf19.1855	Characterized orf19.700 (SEO1)	Single ORF	Single ORF
INTER	27	ORF		2	R	1461034	1461364	1	881012	881342	331	331	NA	NA	97.58	orf19.1854	orf19.1059	Single ORF	Single ORF
INTER	28	ORF		3	R	1462296	1462723	1	882224	882652	428	429	NA	NA	96.5	orf19.1853	orf19.1059	Single ORF	Single ORF
INTER	28	ORF		3	R	1462309	1462719	3	1622368	1622778	411	411	NA	NA	90.27	orf19.1853	orf19.6791	Single ORF	Single ORF
INTER	12	tRNA		7	R	1474107	1474205	2	1143925	1144022	99	98	NA	NA	98.99									Known
INTER	12	tRNA		7	R	1474112	1474208	4	245691	245787	97	97	NA	NA	96.91									Known
INTRA	12	tRNA		7	R	1474112	1474204	R	1234739	1234647	93	93	239557	Inverted	100	tRNA (AGA)	tRNA (AGA)							Known
INTRA	12	tRNA		7	R	1474113	1474203	R	1243752	1243842	91	91	230451	Tandem	100	tRNA (AGA)	tRNA (AGA)							Known
INTER	43	LTR		14	R	1474279	1474751	2	655417	654945	473	473	NA	NA	93.02									Known
INTER	43	LTR		14	R	1474281	1474752	7	674456	674927	472	472	NA	NA	87.74									Known
INTRA	43	LTR		14	R	1474282	1474740	R	2243670	2243222	459	449	768482	Inverted	88.45	Psi-Rd LTR	Intergenic Region			Unannotated LTR				Known
INTER	43	LTR		14	R	1474282	1474512	2	148241	148011	231	231	NA	NA	95.67					Unannotated LTR (partial)				Known
INTER	43	LTR		14	R	1474282	1474751	2	1012886	1012417	470	470	NA	NA	92.98									Known
INTER	43	LTR		14	R	1474282	1474751	5	500710	501179	470	470	NA	NA	92.98									Known
INTER	43	LTR		14	R	1474282	1474751	7	779147	779616	470	470	NA	NA	86.84									Known
INTRA	43	LTR		14	R	1474282	1474751	R	211055	210586	470	470	1264165	Inverted	92.98	Psi-Rd LTR	Psi-Rb LTR, Part of Characterized orf19.3262 (ATO10)							Known
INTRA	43	LTR		14	R	1474282	1474751	R	215731	215262	470	470	1259489	Inverted	92.98	Psi-Rd LTR	Retrotransposon TCA9-R, Part of Characterized orf19.3261 (ATO9)							Known
INTRA	43	LTR		14	R	1474282	1474751	R	1968792	1968323	470	470	493572	Inverted	87.26	Psi-Rd LTR	Psi-Rc LTR							Known
INTER	43	LTR		14	R	1474421	1474751	1	1293899	1294216	331	318	NA	NA	92.15					Unannotated LTR (partial)				Known
INTER	43	LTR		14	R	1474421	1474751	7	942020	941692	331	329	NA	NA	92.15					Unannotated LTR (partial)				Known
INTRA	195	ORF		2	R	1519018	1519251	R	319330	319096	234	235	1200155	Inverted	88.98	Characterized orf19.2360 (URA2)	Characterized orf19.3221 (CPA2)	Portion	Portion
INTER	137	ORF	ALS	MANY	R	1533194	1534298	6	793875	792771	1105	1105	NA	Tandem	80.23	ALS	ALS	Portion	Portion
INTER	137	ORF	ALS	MANY	R	1533228	1533650	6	793193	792771	423	423	NA	Tandem	84.43	ALS	ALS	Portion	Portion
INTER	137	ORF	ALS	MANY	R	1533228	1534190	6	793733	792771	963	963	NA	Tandem	81.71	ALS	ALS	Portion	Portion
INTRA	137	ORF	ALS	MANY	R	1533228	1534190	R	1533552	1534514	963	963	638	Tandem	81.85	ALS	ALS	Portion	Portion
INTRA	137	ORF	ALS	MANY	R	1533235	1534325	R	1533343	1534433	1091	1091	982	Tandem	80.44	ALS	ALS	Portion	Portion
INTER	137	ORF	ALS	MANY	R	1533238	1533866	6	793399	792771	629	629	NA	Tandem	81.01	ALS	ALS	Portion	Portion
INTER	137	ORF	ALS	MANY	R	1533343	1534343	6	793834	792834	1001	1001	NA	Tandem	81.31	ALS	ALS	Portion	Portion
INTRA	137	ORF	ALS	MANY	R	1533343	1534433	R	1533235	1534325	1091	1091	1198	Tandem	80.44	ALS	ALS	Portion	Portion
INTRA	137	ORF	ALS	MANY	R	1533552	1534514	R	1533228	1534190	963	963	1286	Tandem	81.85	ALS	ALS	Portion	Portion
INTER	137	ORF	ALS	MANY	R	1534459	1535949	6	792826	791332	1491	1495	NA	Tandem	84.57	ALS	ALS	Portion	Portion
INTER	137	ORF	ALS	MANY	R	1534503	1535847	6	783926	782582	1345	1345	NA	Tandem	84.34	ALS	ALS	Portion	Portion
INTER	137	ORF	ALS	MANY	R	1534982	1535774	6	972285	971493	793	793	NA	Tandem	83.02	ALS	ALS	Portion	Portion
INTRA	217	ORF		2	R	1557593	1562347	R	1627014	1622262	4755	4753	59915	Inverted	97.81	Part of Uncharacterized orf19.11, Orf19.734 (GLK1), Uncharacterized orf19.733	Part of Uncharacterized orf19.2620, orf19.6116 (GLK4), Uncharacterized orf19.6117	Multi ORF	Multi ORF			CNV
INTRA	218	ORF		2	R	1565910	1569171	R	1639106	1642351	3262	3246	69935	Tandem	97.73	Uncharacterized orf19.730	Characterized orf19.729.1 (RGD3)	Single ORF	Single ORF
INTER	106	Intergenic		6	R	1585333	1585646	6	986935	986620	314	316	NA	NA	98.73
INTER	106	LTR		6	R	1585333	1585645	2	1665548	1665235	313	314	NA	NA	98.1					Unannotated LTR/Retrotransposon (partial)
INTER	106	Intergenic		6	R	1585334	1585614	7	608778	608496	281	283	NA	NA	95.41
INTER	106	Intergenic		6	R	1585334	1585645	6	987796	987483	312	314	NA	NA	98.73
INTER	106	Retrotransposon		6	R	1585334	1585645	2	1669783	1669471	312	313	NA	NA	98.09					Unannotated LTR/Retrotransposon (partial)
INTER	120	tRNA		4	R	1608032	1608125	3	412125	412221	94	97	NA	NA	95.88
INTRA	120	tRNA		4	R	1608039	1608135	R	1788879	1788784	97	96	180649	Inverted	94.85	tRNA (UUU)	tRNA (UUU)
INTRA	120	tRNA		4	R	1608039	1608135	R	1787782	1787877	97	96	179647	Tandem	94.85	tRNA (UUU)	tRNA (UUU)
INTER	141	LTR		3	R	1611186	1611716	3	1646962	1647492	531	531	NA	NA	99.25									Known
INTRA	141	LTR		3	R	1611186	1611717	R	2103918	2103387	532	532	491670	Inverted	97.37	Kahu-Ra LTR	Kahu-Rb LTR							Known
INTRA	217	ORF		2	R	1622262	1627014	R	1562347	1557593	4753	4755	69421	Inverted	97.81	Part of Uncharacterized orf19.2620, orf19.6116 (GLK4), Uncharacterized orf19.6117	Part of Uncharacterized orf19.11, Orf19.734 (GLK1), Uncharacterized orf19.733	Multi ORF	Multi ORF		LOH	CNV
INTRA	218	ORF		2	R	1639106	1642351	R	1565910	1569171	3246	3262	76441	Tandem	97.73	Characterized orf19.729.1 (RGD3)	Uncharacterized orf19.730	Single ORF	Single ORF
INTRA	219	ORF		2	R	1700726	1701543	R	1735130	1735944	818	815	33587	Tandem	87.16	Uncharacterized orf19.3711	Uncharacterized orf19.604	Portion	Portion
INTER	96	tRNA		6	R	1713673	1713758	4	164082	164170	86	89	NA	NA	95.51
INTER	96	tRNA		6	R	1713681	1713758	2	1027313	1027235	78	79	NA	NA	98.73						LOH
INTER	96	tRNA		6	R	1713681	1713759	4	780297	780376	79	80	NA	NA	98.75
INTRA	96	tRNA		6	R	1713681	1713769	R	1882711	1882799	89	89	168942	Tandem	95.56	tRNA (GCC)	tRNA (GCC)
INTER	96	tRNA		6	R	1713682	1713758	4	168304	168228	77	77	NA	NA	100
INTRA	219	ORF		2	R	1735130	1735944	R	1700726	1701543	815	818	35218	Tandem	87.16	Uncharacterized orf19.604	Uncharacterized orf19.3711	Portion	Portion
INTER	30	ORF		2	R	1762631	1763258	1	892314	891690	628	625	NA	NA	80.54	orf19.6367	orf19.1065	Portion	Portion
INTRA	120	tRNA		4	R	1787777	1787879	R	1788884	1788782	103	103	903	Inverted	100	tRNA (UUU)	tRNA (UUU)				LOH
INTER	120	tRNA		4	R	1787782	1787866	3	412134	412219	85	86	NA	NA	97.67
INTRA	120	tRNA		4	R	1787782	1787877	R	1608039	1608135	96	97	179838	Tandem	94.85	tRNA (UUU)	tRNA (UUU)
INTRA	120	tRNA		4	R	1788782	1788884	R	1787879	1787777	103	103	1107	Inverted	100	tRNA (UUU)	tRNA (UUU)
INTRA	120	tRNA		4	R	1788784	1788879	R	1608135	1608039	96	97	180840	Inverted	94.85	tRNA (UUU)	tRNA (UUU)
INTER	120	tRNA		4	R	1788795	1788879	3	412219	412134	85	86	NA	NA	97.67
INTER	98	tRNA		5	R	1813268	1813379	2	1321505	1321620	112	116	NA	NA	93.97
INTER	98	tRNA		5	R	1813277	1813378	2	1620312	1620416	102	105	NA	NA	92.38
INTER	98	tRNA		5	R	1813280	1813380	4	1015524	1015624	101	101	NA	NA	93.14
INTER	98	tRNA		5	R	1813281	1813379	2	1112384	1112284	99	101	NA	NA	96.04
INTRA	220	ORF		2	R	1839472	1839610	R	1839694	1839832	139	139	84	Tandem	92.81	Characterized orf19.6420 (PGA13)	Characterized orf19.6420 (PGA13)	Portion	Portion
INTRA	220	ORF		2	R	1839694	1839832	R	1839472	1839610	139	139	360	Tandem	92.81	Characterized orf19.6420 (PGA13)	Characterized orf19.6420 (PGA13)	Portion	Portion
INTER	75	tRNA		8	R	1841903	1842027	6	7054	6934	125	121	NA	NA	88.8
INTER	75	tRNA		8	R	1841903	1842027	2	175914	176042	125	129	NA	NA	87.69
INTER	75	tRNA		8	R	1841903	1842032	6	993058	992929	130	130	NA	NA	95.38
INTER	75	tRNA		8	R	1841903	1842032	2	323391	323523	130	133	NA	NA	87.41
INTRA	75	tRNA		8	R	1841907	1842027	R	10424	10308	121	117	1831719	Mirrored	88.43	tRNA (CAA)	tRNA (CAA)
INTER	123	tRNA		7	R	1881054	1881150	5	217461	217557	97	97	NA	NA	96.91
INTER	123	tRNA		7	R	1881054	1881158	5	769640	769745	105	106	NA	NA	97.17
INTER	123	tRNA		7	R	1881055	1881158	3	703182	703287	104	106	NA	NA	97.17
INTER	123	tRNA		7	R	1881055	1881158	5	217569	217673	104	105	NA	NA	97.14
INTER	123	tRNA		7	R	1881055	1881169	3	447714	447598	115	117	NA	NA	95.73
INTER	123	tRNA		7	R	1881055	1881170	3	835892	835776	116	117	NA	NA	90.98
INTER	96	tRNA		6	R	1882708	1882789	4	164088	164170	82	83	NA	NA	97.59
INTER	96	tRNA		6	R	1882709	1882789	4	780294	780375	81	82	NA	NA	97.56
INTER	96	tRNA		6	R	1882709	1882789	2	1027315	1027235	81	81	NA	NA	97.53
INTER	96	tRNA		6	R	1882709	1882789	4	168308	168228	81	81	NA	NA	97.53
INTRA	96	tRNA		6	R	1882711	1882799	R	1713681	1713769	89	89	169118	Tandem	95.56	tRNA (GCC)	tRNA (GCC)
INTER	67	LTR		6	R	1883850	1883944	1	2887407	2887313	95	95	NA	NA	95.79					Unannotated LTR (partial)
INTRA	67	Intergenic		6	R	1883855	1883944	R	1967940	1968029	90	90	83996	Tandem	94.44
INTER	67	LTR		6	R	1883856	1883938	3	1273232	1273150	83	83	NA	NA	97.59					Unannotated LTR (partial)
INTER	67	LTR		6	R	1883856	1883944	7	756227	756139	89	89	NA	NA	96.63					Unannotated LTR (partial)
INTRA	221	Intergenic		2	R	1884112	1884276	R	1887129	1887293	165	165	2853	Tandem	95.76
INTRA	222	Intergenic		2	R	1884461	1884659	R	1897175	1897373	199	199	12516	Tandem	97.49
INTRA	223	Intergenic		2	R	1884597	1884890	R	1897356	1897649	294	294	12466	Tandem	100
INTRA	221	Intergenic		2	R	1887129	1887293	R	1884112	1884276	165	165	3181	Tandem	95.76
INTRA	224	Intergenic		2	R	1887410	1887485	R	1888551	1888624	76	74	1066	Tandem	96.05
INTRA	225	Intergenic		2	R	1887493	1887880	R	1887733	1888105	388	373	147	Tandem	83.25
INTRA	226	Intergenic		2	R	1887615	1887770	R	1888040	1888192	156	153	270	Tandem	87.97
INTRA	227	Intergenic		2	R	1887635	1887762	R	1888238	1888361	128	124	476	Tandem	90.7
INTRA	225	Intergenic		2	R	1887733	1888105	R	1887493	1887880	373	388	612	Tandem	83.25
INTRA	228	Intergenic		2	R	1887805	1887897	R	1887905	1887996	93	92	8	Tandem	95.7
INTRA	228	Intergenic		2	R	1887905	1887996	R	1887805	1887897	92	93	191	Tandem	95.7
INTRA	226	Intergenic		2	R	1888040	1888192	R	1887615	1887770	153	156	577	Tandem	87.97
INTRA	229	Intergenic		2	R	1888129	1888215	R	1888675	1888763	87	89	460	Tandem	94.44
INTRA	227	Intergenic		2	R	1888238	1888361	R	1887635	1887762	124	128	726	Tandem	90.7
INTRA	230	Intergenic		2	R	1888255	1888440	R	1888324	1888512	186	189	116	Tandem	83.25
INTRA	230	Intergenic		2	R	1888324	1888512	R	1888255	1888440	189	186	257	Tandem	83.25
INTRA	224	Intergenic		2	R	1888551	1888624	R	1887410	1887485	74	76	1214	Tandem	96.05
INTRA	229	Intergenic		2	R	1888675	1888763	R	1888129	1888215	89	87	634	Tandem	94.44
INTRA	231	Intergenic		2	R	1889514	1889584	R	1897750	1897820	71	71	8166	Tandem	100
INTRA	222	Intergenic		2	R	1897175	1897373	R	1884461	1884659	199	199	12912	Tandem	97.49
INTRA	223	Intergenic		2	R	1897356	1897649	R	1884597	1884890	294	294	13052	Tandem	100
INTRA	231	Intergenic		2	R	1897750	1897820	R	1889514	1889584	71	71	8306	Tandem	100
INTER	100	tRNA		2	R	1919707	1919784	2	1238007	1237930	78	78	NA	NA	100
INTER	6	LTR		10	R	1924209	1924696	7	927486	927044	488	443	NA	NA	85.48					Unannotated LTR				Known
INTER	6	LTR		10	R	1924224	1924696	7	521909	521438	473	472	NA	NA	99.58									Known
INTER	6	LTR		10	R	1924225	1924696	1	222654	222184	472	471	NA	NA	98.94									Known
INTER	6	LTR		10	R	1924226	1924690	7	796673	796253	465	421	NA	NA	83.48					Unannotated LTR				Known
INTER	6	LTR		10	R	1924226	1924696	7	528932	528463	471	470	NA	NA	99.58									Known
INTER	6	LTR		10	R	1924226	1924697	5	360758	360288	472	471	NA	NA	95.55									Known
INTRA	6	LTR		10	R	1924226	1924697	R	2182782	2182312	472	471	257615	Inverted	99.58	Eta-Rb LTR	Eta-Ra LTR							Known
INTER	6	LTR		10	R	1924326	1924696	1	363503	363873	371	371	NA	NA	94.35					Unannotated LTR (partial)				Known
INTER	6	LTR		10	R	1924477	1924636	1	1657494	1657318	160	177	NA	NA	86.44					Unannotated LTR (partial)				Known
INTER	50	LTR		7	R	1938960	1939062	1	1815252	1815354	103	103	NA	NA	93.2					Unannotated LTR (partial)				Known
INTER	92	LTR		4	R	1939570	1939834	2	2169362	2169098	265	265	NA	NA	93.96									Known
INTER	84	Intergenic		2	R	1939838	1940085	2	496372	496618	248	247	NA	NA	98.39
INTER	50	LTR		7	R	1947302	1947582	2	1417187	1416908	281	280	NA	NA	98.58									Known
INTER	50	LTR		7	R	1947303	1947582	1	1815250	1815529	280	280	NA	NA	97.86									Known
INTRA	50	LTR		7	R	1947336	1947579	R	1968322	1968078	244	245	20499	Inverted	92.65	Pi-Ra LTR	Pi-Rb LTR							Known
INTRA	50	LTR		7	R	1947386	1947579	R	611816	611617	194	200	1335962	Inverted	91.5	Pi-Ra LTR	Intergenic Region			Unannotated LTR (partial)				Known
INTRA	50	LTR		7	R	1947413	1947579	R	2203300	2203133	167	168	255554	Inverted	93.45	Pi-Ra LTR	Intergenic Region			Unannotated LTR (partial)				Known
INTER	67	LTR		6	R	1967937	1968080	3	1273237	1273092	144	146	NA	NA	96.58					Unannotated LTR (partial)				Known
INTRA	67	Intergenic		6	R	1967940	1968029	R	1883855	1883944	90	90	84174	Tandem	94.44									Known
INTER	67	LTR		6	R	1967941	1968080	1	2887401	2887261	140	141	NA	NA	97.87					Unannotated LTR (partial)				Known
INTER	67	LTR		6	R	1967941	1968080	7	756227	756087	140	141	NA	NA	97.87					Unannotated LTR (partial)				Known
INTRA	50	LTR		7	R	1968074	1968245	R	2203129	2203300	172	172	235055	Inverted	97.09	Pi-Rb LTR	Intergenic Region			Unannotated LTR (partial)				Known
INTRA	50	LTR		7	R	1968075	1968272	R	611614	611816	198	203	1356658	Tandem	92.61	Pi-Rb LTR	Intergenic Region			Unannotated LTR (partial)				Known
INTER	50	LTR		7	R	1968078	1968322	1	1815526	1815283	245	244	NA	NA	93.47									Known
INTER	50	LTR		7	R	1968078	1968322	2	1416911	1417153	245	243	NA	NA	93.06									Known
INTRA	50	LTR		7	R	1968078	1968322	R	1947579	1947336	245	244	20986	Inverted	92.65	Pi-Rb LTR	Pi-Ra LTR							Known
INTRA	43	LTR		14	R	1968318	1968792	R	215256	215731	475	476	1753536	Tandem	92.87	Psi-Rc LTR	Retrotransposon TCA9-R, Part of Characterized orf19.3261 (ATO9)							Known
INTER	43	LTR		14	R	1968320	1968653	1	1294219	1293899	334	321	NA	NA	86.53					Unannotated LTR (partial)				Known
INTER	43	LTR		14	R	1968320	1968653	7	941689	942020	334	332	NA	NA	92.81					Unannotated LTR (partial)				Known
INTRA	43	LTR		14	R	1968320	1968792	R	210583	211055	473	473	1758209	Tandem	93.04	Psi-Rc LTR	Psi-Rb LTR, Part of Characterized orf19.3262 (ATO10)							Known
INTER	43	LTR		14	R	1968322	1968792	7	779617	779147	471	471	NA	NA	98.73									Known
INTER	43	LTR		14	R	1968323	1968792	7	674926	674457	470	470	NA	NA	99.15									Known
INTER	43	LTR		14	R	1968323	1968792	2	1012417	1012886	470	470	NA	NA	93.84									Known
INTER	43	LTR		14	R	1968323	1968792	5	501179	500710	470	470	NA	NA	93.42									Known
INTER	43	LTR		14	R	1968323	1968792	2	654945	655414	470	470	NA	NA	92.99									Known
INTRA	43	LTR		14	R	1968323	1968792	R	1474751	1474282	470	470	494510	Inverted	87.26	Psi-Rc LTR	Psi-Rd LTR							Known
INTER	43	LTR		14	R	1968562	1968792	2	148011	148241	231	231	NA	NA	84.91					Unannotated LTR (partial)				Known
INTER	37	LTR		13	R	1971125	1971633	4	637136	637644	509	509	NA	NA	99.41									Known
INTER	37	LTR		13	R	1971125	1971633	6	889168	888660	509	509	NA	NA	99.02									Known
INTER	37	LTR		13	R	1971126	1971633	1	2590792	2591299	508	508	NA	NA	99.02									Known
INTER	37	LTR		13	R	1971126	1971633	4	1179178	1178670	508	509	NA	NA	99.02									Known
INTER	37	LTR		13	R	1971126	1971633	6	326018	325510	508	509	NA	NA	97.84									Known
INTRA	37	LTR		13	R	1971126	1971633	R	626194	625687	508	508	1345946	Inverted	98.82	Zeta-Rc LTR	Zeta-Rb LTR							Known
INTRA	37	LTR		13	R	1971126	1971634	R	1097846	1098354	509	509	873788	Tandem	99.02	Zeta-Rc LTR	Zeta-Ra LTR							Known
INTER	37	LTR		13	R	1971132	1971366	7	591374	591609	235	236	NA	NA	89.41					Unannotated LTR (partial)				Known
INTER	37	LTR		13	R	1971132	1971633	3	822752	822260	502	493	NA	NA	91.24									Known
INTER	37	LTR		13	R	1971221	1971627	1	1291288	1291696	407	409	NA	NA	94.38					Unannotated LTR (partial)				Known
INTER	37	LTR		13	R	1971302	1971627	2	2168710	2169035	326	326	NA	NA	94.79									Known
INTRA	200	LTR		2	R	1998847	1999232	R	420725	420347	386	379	1578885	Inverted	90.7	Xi-Ra LTR	Intergenic Region			Unannotated LTR				Known
INTER	95	tRNA		6	R	2009036	2009125	4	782811	782724	90	88	NA	NA	96.67
INTER	95	tRNA		6	R	2009037	2009120	2	1024075	1024156	84	82	NA	NA	97.62
INTER	95	tRNA		6	R	2009038	2009120	4	781039	781119	83	81	NA	NA	97.59
INTER	95	tRNA		6	R	2009038	2009120	4	227872	227791	83	82	NA	NA	96.39
INTER	95	tRNA		6	R	2009039	2009120	4	782653	782573	82	81	NA	NA	97.56
INTER	163	ORF		2	R	2032338	2032682	5	638099	638442	345	344	NA	NA	90.86	orf19.6608	snR10c	Portion	Portion	Unannotated ORF (partial)
INTRA	232	ORF		2	R	2034346	2034433	R	2034451	2034535	88	85	18	Tandem	86.36	Uncharacterized orf19.6608	Uncharacterized orf19.6608	Portion	Portion
INTRA	232	ORF		2	R	2034451	2034535	R	2034346	2034433	85	88	189	Tandem	86.36	Uncharacterized orf19.6608	Uncharacterized orf19.6608	Portion	Portion
INTER	40	LTR		4	R	2035222	2035506	1	2910785	2911069	285	285	NA	NA	93.71									Known
INTER	40	LTR		4	R	2035222	2035506	2	1333691	1333407	285	285	NA	NA	88.81									Known
INTER	69	LTR		5	R	2036689	2036872	1	3099044	3099226	184	183	NA	NA	90.32					Unannotated LTR
INTER	69	LTR		5	R	2036690	2036872	6	1032617	1032438	183	180	NA	NA	90.71					Unannotated LTR
INTER	69	LTR		5	R	2036694	2036872	4	1262702	1262877	179	176	NA	NA	90.5
INTER	101	ORF		2	R	2079960	2080249	2	1332762	1333051	290	290	NA	NA	92.81	orf19.7550	orf19.33	Portion	Portion
INTRA	141	LTR		3	R	2103387	2103918	R	1611717	1611186	532	532	492732	Inverted	97.37	Kahu-Rb LTR	Kahu-Ra LTR							Known
INTER	141	LTR		3	R	2103388	2103919	3	1647492	1646961	532	532	NA	NA	98.12									Known
INTER	35	LTR		7	R	2150339	2150623	1	1055238	1054955	285	284	NA	NA	95.79									Known
INTER	35	LTR		7	R	2150343	2150623	2	1442734	1442454	281	281	NA	NA	96.09									Known
INTER	35	LTR		7	R	2150343	2150623	1	3187513	3187235	281	279	NA	NA	95.37									Known
INTER	35	LTR		7	R	2150343	2150624	7	553921	554201	282	281	NA	NA	95.74									Known
INTER	35	LTR		7	R	2150343	2150624	7	560062	560342	282	281	NA	NA	95.74									Known
INTER	35	LTR		7	R	2150343	2150624	1	3187869	3187589	282	281	NA	NA	95.04									Known
INTER	49	LTR		3	R	2154256	2154454	1	1808229	1808031	199	199	NA	NA	97.99									Known
INTER	49	LTR		3	R	2154256	2154454	3	14553	14751	199	199	NA	NA	97.99									Known
INTRA	90	LTR		6	R	2154581	2154915	R	2258674	2258374	335	301	103459	Mirrored	87.46	Theta-Ra LTR	Intergenic Region			Unannotated LTR				Known
INTER	90	LTR		6	R	2154581	2154832	4	357594	357852	252	259	NA	NA	91.54									Known
INTER	90	LTR		6	R	2154581	2154832	4	1315813	1315548	252	266	NA	NA	90.64									Known
INTER	90	LTR		6	R	2154581	2154832	7	256982	257245	252	264	NA	NA	89.81									Known
INTER	90	LTR		6	R	2154581	2154910	2	735216	734881	330	336	NA	NA	94.96									Known
INTRA	6	LTR		10	R	2182312	2182782	R	1924697	1924226	471	472	258556	Inverted	99.58	Eta-Ra LTR	Eta-Rb LTR							Known
INTER	6	LTR		10	R	2182312	2182783	5	360288	360759	472	472	NA	NA	95.97									Known
INTER	6	LTR		10	R	2182313	2182682	1	363873	363503	370	371	NA	NA	94.88					Unannotated LTR				Known
INTER	6	LTR		10	R	2182313	2182779	7	927044	927466	467	423	NA	NA	86.3					Unannotated LTR				Known
INTER	6	LTR		10	R	2182313	2182782	7	521438	521907	470	470	NA	NA	100									Known
INTER	6	LTR		10	R	2182313	2182782	1	222184	222653	470	470	NA	NA	99.36									Known
INTER	6	LTR		10	R	2182313	2182783	7	528463	528933	471	471	NA	NA	100									Known
INTER	6	LTR		10	R	2182319	2182782	7	796253	796673	464	421	NA	NA	83.91					Unannotated LTR				Known
INTER	6	LTR		10	R	2182373	2182531	1	1657318	1657494	159	177	NA	NA	85.88					Unannotated LTR (partial)				Known
INTRA	233	ORF		2	R	2197884	2198000	R	2198007	2198125	117	119	7	Tandem	91.6	Uncharacterized orf19.7606	Uncharacterized orf19.7606	Portion	Portion
INTRA	233	ORF		2	R	2198007	2198125	R	2197884	2198000	119	117	241	Tandem	91.6	Uncharacterized orf19.7606	Uncharacterized orf19.7606	Portion	Portion
INTRA	50	LTR		7	R	2203129	2203300	R	1968074	1968245	172	172	235055	Inverted	97.09	Intergenic Region	Pi-Rb LTR			Unannotated LTR (partial)
INTRA	50	Intergenic		7	R	2203130	2203300	R	611614	611789	171	176	1591686	Tandem	92.61
INTER	50	LTR		7	R	2203133	2203300	1	1815526	1815360	168	167	NA	NA	94.05					Unannotated LTR (partial)
INTER	50	LTR		7	R	2203133	2203300	2	1416911	1417076	168	166	NA	NA	94.05					Unannotated LTR (partial)
INTRA	50	LTR		7	R	2203133	2203300	R	1947579	1947413	168	167	255887	Inverted	93.45	Intergenic Region	Pi-Ra LTR			Unannotated LTR (partial)
INTER	192	Intergenic		2	R	2203299	2203471	7	928049	927877	173	173	NA	NA	93.64
INTRA	43	LTR		14	R	2243222	2243670	R	1474740	1474282	449	459	769388	Inverted	88.45	Intergenic Region	Psi-Rd LTR			Unannotated LTR				Known
INTER	43	Intergenic		14	R	2243231	2243531	1	1294196	1293899	301	298	NA	NA	84.24									Known
INTER	43	LTR		14	R	2243231	2243674	2	1012437	1012890	444	454	NA	NA	84.8					Unannotated LTR				Known
INTER	43	LTR		14	R	2243231	2243670	2	654965	655414	440	450	NA	NA	85.11					Unannotated LTR (partial)				Known
INTER	43	LTR		14	R	2243231	2243670	5	501159	500710	440	450	NA	NA	84.89					Unannotated LTR (partial)				Known
INTRA	43	LTR		14	R	2243231	2243670	R	210606	211055	440	450	2033064	Tandem	85.11	Intergenic Region	Psi-Rb LTR, Part of Characterized orf19.3262 (ATO10)			Unannotated ORF/LTR (partial)				Known
INTRA	43	Retrotransposon		14	R	2243231	2243670	R	215282	215731	440	450	2028388	Tandem	85.11	Intergenic Region	Retrotransposon TCA9-R, Part of Characterized orf19.3261 (ATO9)			Unannotated ORF/Retrotransposon (partial)				Known
INTER	43	Intergenic		14	R	2243440	2243670	2	148011	148241	231	231	NA	NA	90.48									Known
INTER	13	LTR		6	R	2243679	2244076	1	404266	403870	398	397	NA	NA	98.49									Known
INTER	13	LTR		6	R	2243680	2244076	2	1886922	1887317	397	396	NA	NA	98.24									Known
INTRA	13	LTR		6	R	2243684	2244070	R	427339	426955	387	385	1817115	Inverted	91.75	Alpha-Ra LTR	Alpha-Rc LTR							Known
INTRA	13	LTR		6	R	2243684	2244073	R	961464	961852	390	389	1282609	Tandem	98.97	Alpha-Ra LTR	Alpha-Rb LTR							Known
INTER	13	LTR		6	R	2243807	2244066	5	192994	192734	260	261	NA	NA	86.64					Unannotated LTR (partial)				Known
INTRA	90	LTR		6	R	2258374	2258674	R	2154915	2154581	301	335	104093	Mirrored	87.46	Intergenic Region	Theta-Ra LTR			Unannotated LTR
INTER	90	LTR		6	R	2258379	2258708	2	734881	735250	330	370	NA	NA	85.71					Unannotated LTR
INTER	90	LTR		6	R	2258467	2258708	4	1315584	1315847	242	264	NA	NA	88.68					Unannotated LTR (partial)
INTER	90	LTR		6	R	2258472	2258706	4	357811	357562	235	250	NA	NA	90.84					Unannotated LTR (partial)
INTER	90	LTR		6	R	2258477	2258706	7	257200	256950	230	251	NA	NA	88.84					Unannotated LTR (partial)
INTER	41	ORF		3	R	2285529	2286389	1	1293864	1293048	861	817	NA	NA	80.6			Single ORF	Single ORF
INTRA	41	ORF		3	R	2285529	2286389	R	9863	9072	861	792	2277317	Inverted	82.49	Characterized orf19.7680 (CTA26)	TLO1	Single ORF	Single ORF
INTER	41	ORF		3	R	2285892	2286389	1	1293531	1293048	498	484	NA	NA	91.68			Portion	Portion
