# Supplementary material for: Genome plasticity in Candida albicans is driven by long repeat sequences
Source: eLife journal article supplement (doi:10.7554/elife.45954), 2019-06-07
Supplement: supp [file elife-45954-supp-v1.zip › elife_poa_e45954_Supplementary_File_3.xlsx]

## Sheet: Todd_Supplementary File 3
Figure 3 Breakpoint Number	Isolate	Breakpoint	INTRA or INTER	Repeat Family Number	General Feature Present	Repetive Gene (ALS/PGA/etc)	Copies per Genome	Chromosome Sequence 1	Start Sequence 1	End Sequence 1	Chromosome Sequence 2	Start Sequence 2	End Sequence 2	Copy Length Sequence 1	Copy Length Sequence 2	Spacer Length	Repeat Type	Identity	Gene Features in Sequence 1	Corresponding Gene Features in Sequence 2	Unnanotated Intergenic Sequence	LOH Breakpoint	CNV Breakpoint	Sequence Inversion	CGD Repeat
1	AMS3420		INTRA	14	ORF		2	1	434435	436073	1	408328	406690	1639	1639	29383	Inverted	91.46	Characterized orf19.3668 (HGT2)	Characterized orf19.4527 (HGT1)		LOH	CNV
2	AMS3742	Left Break	INTRA	65	ORF		2	1	2802155	2803488	1	2808952	2807633	1334	1320	4145	Inverted	93.78	Uncharacterized orf19.4916, Uncharacterized orf19.4917	Uncharacterized orf19.4921			CNV
3	AMS3742	Right Break	INTRA	40	LTR		4	1	2910815	2911062	1	1292446	1292695	248	250	1618616	Tandem	89.64	Tara-1a LTR	Intergenic Region	Unannotated LTR	LOH	CNV		Known
4	AMS3411		INTRA	94	ORF		2	2	927023	927688	2	989374	988708	666	667	61020	Inverted	83.98	Characterized orf19.4510 (IFA4)	Characterized orf19.156 (FGR51)			CNV
5	AMS3053		INTRA	124	ORF		2	3	621732	624946	3	639446	636234	3215	3213	11288	Inverted	99.53	Uncahracterized orf19.279, Uncharacterized orf19.280, Uncharacterized orf19.281, Uncharacterized orf19.284	orf19.297 (DTD2), Uncharacterized orf19.296, Uncharacterized orf19.295, Uncharacterized orf19.292		LOH	CNV
6	AMS3432		INTRA	136	ORF		3	3	1456130	1457911	3	1404161	1402380	1782	1782	55531	Mirrored	99.83	Uncharacterized orf19.7398, orf19.7424 (NSA2), Part of Uncharacterized orf19.7422	Part of Uncharacterized orf19.7397, Uncharacterized orf19.7397.1, Large Intergenic Region		LOH	CNV
7	AMS3743		INTRA	151	Intergenic		2	4	991719	992242	4	995876	995353	524	524	3111	Inverted	99.81	Intergenic Region	Part of CEN4			CNV	Inversion
8	AMS3747		INTRA	161	ORF		2	5	466326	468529	5	473964	471762	2204	2203	3233	Inverted	99.32	orf19.3160 (HSP12), Uncharacterized orf19.3159.4	Uncharacterized orf19.4216, Large Intergenic Region			CNV
9	AMS3747		INTRA	188	ORF		3	7	793789	794449	7	765910	765250	661	661	29199	Inverted	90.83	Uncharacterized orf19.6690	Uncharacterized orf19.6703, Uncharacterized orf19.5508			CNV
10	AMS3413		INTRA	161	ORF		2	5	466326	468529	5	473964	471762	2204	2203	3233	Inverted	99.32	orf19.3160 (HSP12), Uncharacterized orf19.3159.4	Uncharacterized orf19.4216, Large Intergenic Region			CNV
11	AMS3413		INTRA	137	ORF	ALS	MANY	6	898248	901910	6	979471	975813	3663	3659	73903	Inverted	89.28	ALS	ALS			CNV
12	AMS3413	Left Break	MRS	NA	NA		NA	7	575231	589521	NA	NA	NA	14290	NA	NA	MRS	NA	MRS	MRS			CNV
13	AMS3413	Right Break	INTRA	188	ORF		3	7	793789	794449	7	765910	765250	661	661	29199	Inverted	90.83	Uncharacterized orf19.6690	Uncharacterized orf19.6703, Uncharacterized orf19.5508			CNV
14	AMS3748		INTRA	161	ORF		2	5	466326	468529	5	473964	471762	2204	2203	3233	Inverted	99.32	orf19.3160 (HSP12), Uncharacterized orf19.3159.4	Uncharacterized orf19.4216, Large Intergenic Region			CNV
15	AMS3748	Left Break	MRS	NA	NA		NA	7	575231	589521	NA	NA	NA	14290	NA	NA	MRS	NA	MRS	MRS			CNV
16	AMS3748	Right Break	INTRA	188	ORF		3	7	793789	794449	7	765910	765250	661	661	29199	Inverted	90.83	Uncharacterized orf19.6690	Uncharacterized orf19.6703, Uncharacterized orf19.5508		LOH	CNV
17	AMS3744		rDNA	NA	NA		NA	R	1889054	1896830	NA	NA	NA	NA	NA	NA	rDNA	NA	rDNA	rDNA			CNV
18	AMS3328	Left Break	Microsatelite	NA	NA		NA	R	1711600	1711800	NA	NA	NA	200	NA	NA	Microsatelite	NA	Microsatelite	Microsatelite			CNV
19	AMS3328	Right Break	rDNA	NA	NA		NA	R	1889054	1896830	NA	NA	NA	NA	NA	NA	rDNA	NA	rDNA	rDNA			CNV
20	CEC2871	Left Break	INTRA	201	ORF		2	R	478042	479419	R	533720	535097	1378	1378	54301	Tandem	93.76	Characterized orf19.2619 (PHO113)	Characterized orf19.3727 (PHO112)		LOH	CNV
21	CEC2871	Right Break	INTRA	201	ORF		2	R	533720	535097	R	478042	479419	1378	1378	57055	Tandem	93.76	Characterized orf19.3727 (PHO112)	Characterized orf19.2619 (PHO113)		LOH	CNV
22	FH5	Left Break	INTER	9	LTR		3	1	277083	277407	5	535130	534806	325	325	NA	NA	99.69					CNV		Known
23	FH5	Right Break	INTRA	14	ORF		2	1	406690	408328	1	436073	434435	1639	1639	26107	Inverted	91.46	Characterized orf19.4527 (HGT1)	Characterized orf19.3668 (HGT2)			CNV
24	FH5		INTRA	161	ORF		2	5	466326	468529	5	473964	471762	2204	2203	3233	Inverted	99.32	orf19.3160 (HSP12), Uncharacterized orf19.3159.4	Uncharacterized orf19.4216, Large Intergenic Region			CNV
25	FH5	Left Break	INTRA	217	ORF		2	R	1557593	1562347	R	1627014	1622262	4755	4753	59915	Inverted	97.81	Part of Uncharacterized orf19.11, Orf19.734 (GLK1), Uncharacterized orf19.733	Part of Uncharacterized orf19.2620, orf19.6116 (GLK4), Uncharacterized orf19.6117		LOH	CNV
26	FH5	Right Break	INTRA	217	ORF		2	R	1622262	1627014	R	1562347	1557593	4753	4755	69421	Inverted	97.81	Part of Uncharacterized orf19.2620, orf19.6116 (GLK4), Uncharacterized orf19.6117	Part of Uncharacterized orf19.11, Orf19.734 (GLK1), Uncharacterized orf19.733		LOH	CNV
