# Supplementary material for: Genome plasticity in Candida albicans is driven by long repeat sequences
Source: eLife journal article supplement (doi:10.7554/elife.45954), 2019-06-07
Supplement: supp [file elife-45954-supp-v1.zip › elife_poa_e45954_Supplementary_File_4.xlsx]

## Sheet: Todd_Supplementary File 4
Isolates	Chromosome	Transiton Type	Location of Transition	Repeat Type	Repeat Family Number	Repeat Position	General Sequence Feature	Breakpoint
CEC3534	2	Het>Hom	1927198-1928269	Inter	112	1929503-1929982	LTR/CEN2	LOH breakpoint is associated with long repeat
CEC3534	6	Het>Hom	986079-988091	Inter / Intra	106	986621-987796	LTR	LOH breakpoint is associated with long repeat
CEC3558	1	Hom>Het	857731-859966	Intra	22	854122-855772	ORF	LOH breakpoint is associated with long repeat
CEC3558	5	Het>Hom	MRS5	Inter	MRS5	730646	MRS5	LOH breakpoint is associated with long repeat
CEC3603	2	Hom>Het	572642-573342	Intra	87	570231-571460	ORF	LOH breakpoint is associated with long repeat
CEC3603	4	Hom>Het	985260-990742	Intra	151	991719-992242	Intergenic	LOH breakpoint is associated with long repeat
CEC3603	6	Het>Hom	986079-988091	Inter / Intra	106	986621-987483	LTR	LOH breakpoint is associated with long repeat
CEC3603	R	Hom>Het	31674-32715	Inter	59	30694-30889	ORF	LOH breakpoint is associated with long repeat
CEC3615	3	Hom>Het	621634-627853	Intra	124	621732-624946	ORF	LOH breakpoint is associated with long repeat
CEC3615	7	Het>Hom	551653-561520	Inter / Intra	6	521438-560056	LTR	LOH breakpoint is associated with long repeat
CEC3615	R	Het>Hom	rDNA	Intra	rDNA	1897900	rDNA	LOH breakpoint is associated with long repeat
CEC3617	1	Hom>Het	747211-748110	Inter / Intra	20	748290-748416	tRNA	LOH breakpoint is associated with long repeat
CEC3617	2	Hom>Het	805583-812264	Inter / Intra	17	810413-810589	tRNA	LOH breakpoint is associated with long repeat
CEC3617	6	Hom>Het	778967-779409	Intra	137	778356-778577	ORF	LOH breakpoint is associated with long repeat
CEC3617	7	Het>Hom	MRS7b	Inter	MRS7b	589535	MRS7b	LOH breakpoint is associated with long repeat
CEC3617	R	Het>Hom	1785983-1786362	Inter / Intra	120	1787777-1788879	tRNA	LOH breakpoint is associated with long repeat
CEC3662	6	Het>Hom	986460-986079	Inter / Intra	75	987483-987796	tRNA	LOH breakpoint is associated with long repeat
CEC3662	6	Hom>Het	89380-85187	Intra	168	87560-88428	ORF	LOH breakpoint is associated with long repeat
CEC3662	R	Het>Hom	rDNA	Intra	rDNA	1897900	rDNA	LOH breakpoint is associated with long repeat
CEC3708	1	Het>Hom	1294766-1295776	Inter / Intra	43	1293988-1294217	LTR	LOH breakpoint is associated with long repeat
CEC3708	2	Hom>Het	1926149-1926597	Inter	112	1929503-1929982	LTR/CEN2	LOH breakpoint is associated with long repeat
CEC3708	R	Het>Hom	rDNA	Intra	rDNA	1897900	rDNA	LOH breakpoint is associated with long repeat
CEC3711	3	Hom>Het	761680-770236	Intra	130, 127, 126	761588-784807	ORF	LOH breakpoint is associated with long repeat
CEC3711	6	Hom>Het	87302-88297	Intra	168	87560-88428	ORF	LOH breakpoint is associated with long repeat
CEC3711	R	Het>Hom	rDNA	Intra	rDNA	1897900	rDNA	LOH breakpoint is associated with long repeat
CEC4032	5	Het>Hom	813491-820805	Inter	165	812481-812688	LTR	LOH breakpoint is associated with long repeat
CEC4032	6	Het>Hom	986079-988225	Inter / Intra	106	986620-987483	LTR	LOH breakpoint is associated with long repeat
CEC4032	R	Het>Hom	rDNA	Intra	rDNA	1897900	rDNA	LOH breakpoint is associated with long repeat
CEC4488	1	Hom>Het	747211-747808	Inter / Intra	20	748290-748416	tRNA	LOH breakpoint is associated with long repeat
CEC4488	3	Hom>Het	264388-293769	Inter	7	295740-295866	LTR	LOH breakpoint is associated with long repeat
CEC4488	R	Hom>Het	790355-798507	Intra	208	791439-764081	ORF	LOH breakpoint is associated with long repeat
CEC4488	R	Het>Hom	rDNA	Intra	rDNA	1897900	rDNA	LOH breakpoint is associated with long repeat
CEC4493	4	Hom>Het	356669-358936	Inter / Intra	90	357562-357928	LTR	LOH breakpoint is associated with long repeat
CEC4493	6	Hom>Het	746587-746644	Intra	177	744492-750965	ORF	LOH breakpoint is associated with long repeat
CEC723	1	Het>Hom	1632042-1632163	Intra	47	1630629-1631749	ORF	LOH breakpoint is associated with long repeat
CEC723	R	Het>Hom	1628923-1929030	Intra	217	1622262-1627014	ORF	LOH breakpoint is associated with long repeat
F1649	2	Het>Hom	2192221-2192794	Inter	11	2189975-2190759	ORF	LOH breakpoint is associated with long repeat
F1649	3	Het>Hom	1669713-1669869	Inter	142	1668699-1669382	ORF	LOH breakpoint is associated with long repeat
F1649	R	Het>Hom	rDNA	Intra	rDNA	1897900	rDNA	LOH breakpoint is associated with long repeat
F3120	2	Hom>Het	531914-537014	Intra	86	532066-536187	ORF	LOH breakpoint is associated with long repeat
F3120	5	Het>Hom	CEN5	Intra	161	466326-468529	ORF	LOH breakpoint is associated with long repeat
F3120	6	Hom>Het	787946-782416	Inter / Intra	137	787670-787892	ORF(ALS)	LOH breakpoint is associated with long repeat
F3120	6	Het>Hom	228107-228246	Intra	174	229474-230412	ORF	LOH breakpoint is associated with long repeat
F3120	7	Hom>Het	11069-13128	Intra	184	11080-12995	ORF	LOH breakpoint is associated with long repeat
F3120	R	Het>Hom	1713853-1714226	Inter / Intra	96	1713681-1713758	tRNA	LOH breakpoint is associated with long repeat
F3733	R	Het>Hom	rDNA	Intra	rDNA	1897900	rDNA	LOH breakpoint is associated with long repeat
F4639	3	Het>Hom	823069-823833	Inter	37	822252-822752	LTR	LOH breakpoint is associated with long repeat
F4639	6	Hom>Het	MRS6	Inter	MRS6	875345	MRS6	LOH breakpoint is associated with long repeat
F4639	6	Het>Hom	986460-986079	Inter / Intra	106	986621-987796	LTR	LOH breakpoint is associated with long repeat
F4639	7	Het>Hom	780105-781751	Inter	43	779147-779617	LTR	LOH breakpoint is associated with long repeat
P75063	3	Hom>Het	665228-669552	Intra	127	665300-669412	ORF	LOH breakpoint is associated with long repeat
P75063	4	Hom>Het	81670-85846	Intra	144	83962-85706	ORF	LOH breakpoint is associated with long repeat
P75063	5	Het>Hom	MRS5	Inter	MRS5	730646	MRS5	LOH breakpoint is associated with long repeat
P75063	R	Hom>Het	278904-277616	Inter	88	277558-278736	ORF	LOH breakpoint is associated with long repeat
P75063	R	Het>Hom	rDNA	Intra	rDNA	1897900	rDNA	LOH breakpoint is associated with long repeat
P78042	3	Het>Hom	1714665-1716054	Inter / Intra	17	1715749-1715938	tRNA	LOH breakpoint is associated with long repeat
P78042	5	Hom>Het	501934-502708	Inter	43	500706-501183	LTR	LOH breakpoint is associated with long repeat
P78042	5	Het>Hom	MRS5	Inter	MRS5	730646	MRS5	LOH breakpoint is associated with long repeat
P78042	R	Het>Hom	rDNA	Intra	rDNA	1897900	rDNA	LOH breakpoint is associated with long repeat
SC5314	3	Het>Hom	906224-907299	Intra	Telomere-like	906931-910393	Telomere-like	LOH breakpoint is associated with long repeat
SC5314	R	Het>Hom	rDNA	Intra	rDNA	1897900	rDNA	LOH breakpoint is associated with long repeat
CEC3534	3	Hom>Het	394441-398897	NA	NA	NA	NA	LOH breakpoint not associated with long repeat
CEC3534	3	Het>Hom	1515821-1517491	NA	NA	NA	NA	LOH breakpoint not associated with long repeat
CEC3534	R	Het>Hom	1822006-1823808	NA	NA	NA	NA	LOH breakpoint not associated with long repeat
CEC3558	1	Het>Hom	3120998-3121118	NA	NA	NA	NA	LOH breakpoint not associated with long repeat
CEC3558	3	Hom>Het	111604-112204	NA	NA	NA	NA	LOH breakpoint not associated with long repeat
CEC3558	6	Hom>Het	50067-50354	NA	NA	NA	NA	LOH breakpoint not associated with long repeat
CEC3603	6	Hom>Het	705005-705128	NA	NA	NA	NA	LOH breakpoint not associated with long repeat
CEC3603	7	Het>Hom	803571-806524	NA	NA	NA	NA	LOH breakpoint not associated with long repeat
CEC3607	4	Hom>Het	960410-960576	NA	NA	NA	NA	LOH breakpoint not associated with long repeat
CEC3607	6	Hom>Het	667838-667904	NA	NA	NA	NA	LOH breakpoint not associated with long repeat
CEC3607	7	Hom>Het	199957-200097	NA	NA	NA	NA	LOH breakpoint not associated with long repeat
CEC3607	7	Het>Hom	832208-832276	NA	NA	NA	NA	LOH breakpoint not associated with long repeat
CEC3607	R	Het>Hom	1829215-1829247	NA	NA	NA	NA	LOH breakpoint not associated with long repeat
CEC3615	1	Het>Hom	2960778-2960853	NA	NA	NA	NA	LOH breakpoint not associated with long repeat
CEC3615	2	Hom>Het	157616-157822	NA	NA	NA	NA	LOH breakpoint not associated with long repeat
CEC3615	4	Het>Hom	1043041-1043779	NA	NA	NA	NA	LOH breakpoint not associated with long repeat
CEC3615	6	Hom>Het	357953-357981	NA	NA	NA	NA	LOH breakpoint not associated with long repeat
CEC3615	R	Hom>Het	618369-618461	NA	NA	NA	NA	LOH breakpoint not associated with long repeat
CEC3617	2	Het>Hom	1936088-1936791	NA	NA	NA	NA	LOH breakpoint not associated with long repeat
CEC3617	3	Hom>Het	516863-518453	NA	NA	NA	NA	LOH breakpoint not associated with long repeat
CEC3617	4	Hom>Het	428553-431472	NA	NA	NA	NA	LOH breakpoint not associated with long repeat
CEC3617	5	Het>Hom	1133473-1134618	NA	NA	NA	NA	LOH breakpoint not associated with long repeat
CEC3617	7	Hom>Het	319070-319954	NA	NA	NA	NA	LOH breakpoint not associated with long repeat
CEC3662	1	Het>Hom	2393881-2395547	NA	NA	NA	NA	LOH breakpoint not associated with long repeat
CEC3662	2	Hom>Het	1105376-1105967	NA	NA	NA	NA	LOH breakpoint not associated with long repeat
CEC3662	7	Hom>Het	317358-319070	NA	NA	NA	NA	LOH breakpoint not associated with long repeat
CEC3708	5	Het>Hom	1147384-1148505	NA	NA	NA	NA	LOH breakpoint not associated with long repeat
CEC3708	6	Het>Hom	1014189-1014324	NA	NA	NA	NA	LOH breakpoint not associated with long repeat
CEC3708	7	Hom>Het	363791-368827	NA	NA	NA	NA	LOH breakpoint not associated with long repeat
CEC3708	R	Hom>Het	295187-295347	NA	NA	NA	NA	LOH breakpoint not associated with long repeat
CEC3711	2	Hom>Het	325910-325999	NA	NA	NA	NA	LOH breakpoint not associated with long repeat
CEC3711	3	Het>Hom	874477-874980	NA	NA	NA	NA	LOH breakpoint not associated with long repeat
CEC3711	4	Hom>Het	176051-176130	NA	NA	NA	NA	LOH breakpoint not associated with long repeat
CEC3711	R	Hom>Het	1269294-1269514	NA	NA	NA	NA	LOH breakpoint not associated with long repeat
CEC4032	1	Hom>Het	671729-674555	NA	NA	NA	NA	LOH breakpoint not associated with long repeat
CEC4032	1	Het>Hom	2996813-2996966	NA	NA	NA	NA	LOH breakpoint not associated with long repeat
CEC4032	2	Hom>Het	20515-20959	NA	NA	NA	NA	LOH breakpoint not associated with long repeat
CEC4032	3	Het>Hom	1130192-1132304	NA	NA	NA	NA	LOH breakpoint not associated with long repeat
CEC4032	4	Hom>Het	522069-522466	NA	NA	NA	NA	LOH breakpoint not associated with long repeat
CEC4032	4	Het>Hom	1145661-1146342	NA	NA	NA	NA	LOH breakpoint not associated with long repeat
CEC4032	5	Hom>Het	278902-280720	NA	NA	NA	NA	LOH breakpoint not associated with long repeat
CEC4032	6	Hom>Het	768721-769485	NA	NA	NA	NA	LOH breakpoint not associated with long repeat
CEC4488	4	Hom>Het	454348-459200	NA	NA	NA	NA	LOH breakpoint not associated with long repeat
CEC4488	4	Het>Hom	1150155-1150311	NA	NA	NA	NA	LOH breakpoint not associated with long repeat
CEC4488	5	Hom>Het	223369-229014	NA	NA	NA	NA	LOH breakpoint not associated with long repeat
CEC4488	5	Het>Hom	1113954-1118702	NA	NA	NA	NA	LOH breakpoint not associated with long repeat
CEC4488	6	Hom>Het	133447-138020	NA	NA	NA	NA	LOH breakpoint not associated with long repeat
CEC4493	1	Hom>Het	644619-645687	NA	NA	NA	NA	LOH breakpoint not associated with long repeat
CEC4493	1	Het>Hom	3168425-3168790	NA	NA	NA	NA	LOH breakpoint not associated with long repeat
CEC4493	2	Hom>Het	1793069-1793338	NA	NA	NA	NA	LOH breakpoint not associated with long repeat
CEC4493	3	Het>Hom	1624181-1624311	NA	NA	NA	NA	LOH breakpoint not associated with long repeat
CEC4493	7	Het>Hom	716402-719860	NA	NA	NA	NA	LOH breakpoint not associated with long repeat
CEC4493	R	Het>Hom	1802527-1802712	NA	NA	NA	NA	LOH breakpoint not associated with long repeat
CEC723	1	Hom>Het	227549-228002	NA	NA	NA	NA	LOH breakpoint not associated with long repeat
CEC723	2	Hom>Het	195281-195821	NA	NA	NA	NA	LOH breakpoint not associated with long repeat
CEC723	3	Hom>Het	223714-223813	NA	NA	NA	NA	LOH breakpoint not associated with long repeat
CEC723	4	Hom>Het	189912-190065	NA	NA	NA	NA	LOH breakpoint not associated with long repeat
CEC723	4	Het>Hom	1059048-1059187	NA	NA	NA	NA	LOH breakpoint not associated with long repeat
CEC723	6	Hom>Het	19030-19141	NA	NA	NA	NA	LOH breakpoint not associated with long repeat
CEC723	7	Hom>Het	438872-442281	NA	NA	NA	NA	LOH breakpoint not associated with long repeat
CEC723	R	Hom>Het	91493-94276	NA	NA	NA	NA	LOH breakpoint not associated with long repeat
F1649	1	Hom>Het	1302666-1303039	NA	NA	NA	NA	LOH breakpoint not associated with long repeat
F1649	4	Hom>Het	768818-769085	NA	NA	NA	NA	LOH breakpoint not associated with long repeat
F1649	4	Het>Hom	1569682-1569740	NA	NA	NA	NA	LOH breakpoint not associated with long repeat
F1649	5	Hom>Het	121377-121742	NA	NA	NA	NA	LOH breakpoint not associated with long repeat
F1649	6	Hom>Het	54468-56418	NA	NA	NA	NA	LOH breakpoint not associated with long repeat
F1649	R	het>Hom	862764-863279	NA	NA	NA	NA	LOH breakpoint not associated with long repeat
F1649	R	Hom>Het	1033718-1034714	NA	NA	NA	NA	LOH breakpoint not associated with long repeat
F3120	1	Hom>Het	1138268-1138488	NA	NA	NA	NA	LOH breakpoint not associated with long repeat
F3120	3	Het>Hom	919998-920271	NA	NA	NA	NA	LOH breakpoint not associated with long repeat
F3120	4	Het>Hom	250574-250757	NA	NA	NA	NA	LOH breakpoint not associated with long repeat
F3120	6	Hom>Het	480915-481177	NA	NA	NA	NA	LOH breakpoint not associated with long repeat
F3120	7	Het>Hom	885209-886096	NA	NA	NA	NA	LOH breakpoint not associated with long repeat
F3120	R	Hom>Het	249287-249695	NA	NA	NA	NA	LOH breakpoint not associated with long repeat
F3733	3	Hom>Het	28565-39046	NA	NA	NA	NA	LOH breakpoint not associated with long repeat
F3733	5	Het>Hom	239487-240433	NA	NA	NA	NA	LOH breakpoint not associated with long repeat
F3733	5	Hom>Het	294053-296109	NA	NA	NA	NA	LOH breakpoint not associated with long repeat
F3733	5	Het>Hom	1052690-1052980	NA	NA	NA	NA	LOH breakpoint not associated with long repeat
F3733	7	Het>Hom	723748-723858	NA	NA	NA	NA	LOH breakpoint not associated with long repeat
F4639	1	Het>Hom	2200961-2201226	NA	NA	NA	NA	LOH breakpoint not associated with long repeat
F4639	2	Hom>Het	50410-52656	NA	NA	NA	NA	LOH breakpoint not associated with long repeat
F4639	4	Hom>Het	16492-17992	NA	NA	NA	NA	LOH breakpoint not associated with long repeat
F4639	4	Het>Hom	1551340-1552402	NA	NA	NA	NA	LOH breakpoint not associated with long repeat
P75063	1	Het>Hom	1921110-1921281	NA	NA	NA	NA	LOH breakpoint not associated with long repeat
P75063	3	Het>Hom	1263644-1264526	NA	NA	NA	NA	LOH breakpoint not associated with long repeat
P75063	4	Het>Hom	1451243-1452469	NA	NA	NA	NA	LOH breakpoint not associated with long repeat
P75063	5	Hom>Het	245436-245736	NA	NA	NA	NA	LOH breakpoint not associated with long repeat
P75063	6	Hom>Het	444161-444174	NA	NA	NA	NA	LOH breakpoint not associated with long repeat
P75063	7	Hom>Het	181252-181365	NA	NA	NA	NA	LOH breakpoint not associated with long repeat
P78042	2	Hom>Het	203400-203546	NA	NA	NA	NA	LOH breakpoint not associated with long repeat
P78042	7	Hom>Het	10294-11116	NA	NA	NA	NA	LOH breakpoint not associated with long repeat
P78042	7	Het>Hom	437641-437854	NA	NA	NA	NA	LOH breakpoint not associated with long repeat
