# Supplementary material for: Genome plasticity in Candida albicans is driven by long repeat sequences
Source: eLife journal article supplement (doi:10.7554/elife.45954), 2019-06-07
Supplement: supp [file elife-45954-supp-v1.zip › elife_poa_e45954_Supplementary_File_5.xlsx]

## Sheet: 8-mer-AACTTCTT
Chromosome	Position
1	1439..1446		Occurences of AACTTCTT across all 8 chromosomes of SC5314
1	4476..4483		rev: = reverse complement
1	12134..12141
1	34184..34191
1	40133..40140
1	52566..52573
1	73390..73397
1	76328..76335
1	76840..76847
1	79261..79268
1	80166..80173
1	87767..87774
1	92322..92329
1	95413..95420
1	96647..96654
1	97869..97876
1	112771..112778
1	114441..114448
1	124241..124248
1	125887..125894
1	128747..128754
1	150373..150380
1	169100..169107
1	183860..183867
1	195818..195825
1	203892..203899
1	209903..209910
1	221904..221911
1	237385..237392
1	252156..252163
1	255944..255951
1	290114..290121
1	308545..308552
1	325354..325361
1	368877..368884
1	372306..372313
1	382043..382050
1	403682..403689
1	425794..425801
1	442916..442923
1	476288..476295
1	493591..493598
1	532604..532611
1	563222..563229
1	579080..579087
1	614290..614297
1	615175..615182
1	640676..640683
1	640691..640698
1	669255..669262
1	672714..672721
1	710848..710855
1	745496..745503
1	771705..771712
1	774093..774100
1	796420..796427
1	801866..801873
1	811147..811154
1	824789..824796
1	845411..845418
1	867383..867390
1	869519..869526
1	874578..874585
1	875854..875861
1	880945..880952
1	890455..890462
1	906252..906259
1	923556..923563
1	947905..947912
1	956152..956159
1	977263..977270
1	1004844..1004851
1	1015546..1015553
1	1036306..1036313
1	1038793..1038800
1	1062413..1062420
1	1063803..1063810
1	1068605..1068612
1	1073401..1073408
1	1073448..1073455
1	1095700..1095707
1	1112335..1112342
1	1115342..1115349
1	1129204..1129211
1	1130331..1130338
1	1150946..1150953
1	1168620..1168627
1	1196624..1196631
1	1197347..1197354
1	1205511..1205518
1	1211401..1211408
1	1235394..1235401
1	1245181..1245188
1	1250991..1250998
1	1253695..1253702
1	1276019..1276026
1	1279191..1279198
1	1286283..1286290
1	1292353..1292360
1	1322657..1322664
1	1337310..1337317
1	1340904..1340911
1	1348404..1348411
1	1363473..1363480
1	1367083..1367090
1	1371987..1371994
1	1376105..1376112
1	1388284..1388291
1	1390912..1390919
1	1417978..1417985
1	1429797..1429804
1	1461880..1461887
1	1465696..1465703
1	1478656..1478663
1	1483484..1483491
1	1489251..1489258
1	1529193..1529200
1	1529450..1529457
1	1585894..1585901
1	1600201..1600208
1	1617557..1617564
1	1624488..1624495
1	1659935..1659942
1	1661447..1661454
1	1667700..1667707
1	1672183..1672190
1	1673303..1673310
1	1699205..1699212
1	1703989..1703996
1	1713640..1713647
1	1718983..1718990
1	1724344..1724351
1	1734222..1734229
1	1742429..1742436
1	1747784..1747791
1	1765786..1765793
1	1797438..1797445
1	1810352..1810359
1	1834754..1834761
1	1838245..1838252
1	1839395..1839402
1	1846512..1846519
1	1861531..1861538
1	1871636..1871643
1	1875218..1875225
1	1876974..1876981
1	1883097..1883104
1	1905589..1905596
1	1923046..1923053
1	1929166..1929173
1	1952482..1952489
1	1953354..1953361
1	1978228..1978235
1	1982947..1982954
1	2020974..2020981
1	2034908..2034915
1	2056630..2056637
1	2059069..2059076
1	2086440..2086447
1	2102278..2102285
1	2114808..2114815
1	2129952..2129959
1	2140392..2140399
1	2150930..2150937
1	2206361..2206368
1	2207006..2207013
1	2219202..2219209
1	2240751..2240758
1	2256133..2256140
1	2258153..2258160
1	2261038..2261045
1	2263855..2263862
1	2265261..2265268
1	2266727..2266734
1	2266914..2266921
1	2279765..2279772
1	2335006..2335013
1	2337777..2337784
1	2348761..2348768
1	2356281..2356288
1	2356920..2356927
1	2405477..2405484
1	2438940..2438947
1	2449624..2449631
1	2459207..2459214
1	2479309..2479316
1	2482077..2482084
1	2485368..2485375
1	2494925..2494932
1	2495526..2495533
1	2519906..2519913
1	2527248..2527255
1	2528107..2528114
1	2619694..2619701
1	2644716..2644723
1	2699717..2699724
1	2713715..2713722
1	2725593..2725600
1	2736662..2736669
1	2740348..2740355
1	2762112..2762119
1	2770566..2770573
1	2771140..2771147
1	2789108..2789115
1	2792815..2792822
1	2821237..2821244
1	2829553..2829560
1	2835140..2835147
1	2848334..2848341
1	2869321..2869328
1	2872001..2872008
1	2875193..2875200
1	2882871..2882878
1	2883550..2883557
1	2927986..2927993
1	2929222..2929229
1	2937088..2937095
1	2956473..2956480
1	2993048..2993055
1	3002183..3002190
1	3008519..3008526
1	3012808..3012815
1	3018725..3018732
1	3025892..3025899
1	3039933..3039940
1	3044384..3044391
1	3059274..3059281
1	3077135..3077142
1	3077709..3077716
1	3110847..3110854
1	3111081..3111088
1	3117555..3117562
1	3132673..3132680
1	3133245..3133252
1	3148518..3148525
1	3150244..3150251
1	3151361..3151368
1	3159747..3159754
1	3181838..3181845
1	3188062..3188069
1	rev:59852..59859
1	rev:61388..61395
1	rev:61579..61586
1	rev:66511..66518
1	rev:69095..69102
1	rev:71627..71634
1	rev:80968..80975
1	rev:96202..96209
1	rev:115997..116004
1	rev:120228..120235
1	rev:121410..121417
1	rev:126468..126475
1	rev:151450..151457
1	rev:156640..156647
1	rev:224992..224999
1	rev:225292..225299
1	rev:244047..244054
1	rev:246426..246433
1	rev:258177..258184
1	rev:258570..258577
1	rev:261166..261173
1	rev:271740..271747
1	rev:301640..301647
1	rev:304305..304312
1	rev:346498..346505
1	rev:346528..346535
1	rev:371213..371220
1	rev:378204..378211
1	rev:384015..384022
1	rev:398784..398791
1	rev:429593..429600
1	rev:445569..445576
1	rev:455973..455980
1	rev:460389..460396
1	rev:460408..460415
1	rev:462158..462165
1	rev:469587..469594
1	rev:486706..486713
1	rev:486716..486723
1	rev:490771..490778
1	rev:493356..493363
1	rev:513046..513053
1	rev:515122..515129
1	rev:527659..527666
1	rev:534647..534654
1	rev:548709..548716
1	rev:549916..549923
1	rev:553942..553949
1	rev:585022..585029
1	rev:585326..585333
1	rev:591330..591337
1	rev:599841..599848
1	rev:619666..619673
1	rev:623912..623919
1	rev:629036..629043
1	rev:638228..638235
1	rev:640031..640038
1	rev:653991..653998
1	rev:671504..671511
1	rev:718144..718151
1	rev:737952..737959
1	rev:739281..739288
1	rev:749778..749785
1	rev:763997..764004
1	rev:779138..779145
1	rev:800309..800316
1	rev:811749..811756
1	rev:834510..834517
1	rev:838840..838847
1	rev:857170..857177
1	rev:866029..866036
1	rev:868476..868483
1	rev:880115..880122
1	rev:891671..891678
1	rev:907756..907763
1	rev:926843..926850
1	rev:929209..929216
1	rev:940710..940717
1	rev:953943..953950
1	rev:968268..968275
1	rev:970222..970229
1	rev:974994..975001
1	rev:984102..984109
1	rev:993393..993400
1	rev:1005041..1005048
1	rev:1013766..1013773
1	rev:1039038..1039045
1	rev:1039386..1039393
1	rev:1039692..1039699
1	rev:1041136..1041143
1	rev:1045955..1045962
1	rev:1059559..1059566
1	rev:1089291..1089298
1	rev:1089742..1089749
1	rev:1093808..1093815
1	rev:1111551..1111558
1	rev:1112489..1112496
1	rev:1137974..1137981
1	rev:1150177..1150184
1	rev:1156863..1156870
1	rev:1194810..1194817
1	rev:1212250..1212257
1	rev:1216227..1216234
1	rev:1247463..1247470
1	rev:1274216..1274223
1	rev:1285388..1285395
1	rev:1289365..1289372
1	rev:1296892..1296899
1	rev:1316989..1316996
1	rev:1324559..1324566
1	rev:1324905..1324912
1	rev:1327443..1327450
1	rev:1352156..1352163
1	rev:1398818..1398825
1	rev:1423771..1423778
1	rev:1424897..1424904
1	rev:1451087..1451094
1	rev:1452748..1452755
1	rev:1454616..1454623
1	rev:1458892..1458899
1	rev:1477209..1477216
1	rev:1477512..1477519
1	rev:1557653..1557660
1	rev:1559193..1559200
1	rev:1597937..1597944
1	rev:1605311..1605318
1	rev:1629250..1629257
1	rev:1640079..1640086
1	rev:1645584..1645591
1	rev:1676381..1676388
1	rev:1694819..1694826
1	rev:1723045..1723052
1	rev:1728170..1728177
1	rev:1795090..1795097
1	rev:1803196..1803203
1	rev:1820818..1820825
1	rev:1821258..1821265
1	rev:1827545..1827552
1	rev:1833936..1833943
1	rev:1835987..1835994
1	rev:1840798..1840805
1	rev:1841735..1841742
1	rev:1869466..1869473
1	rev:1874020..1874027
1	rev:1875499..1875506
1	rev:1898184..1898191
1	rev:1923072..1923079
1	rev:1951383..1951390
1	rev:1966040..1966047
1	rev:1970855..1970862
1	rev:1998842..1998849
1	rev:2001258..2001265
1	rev:2004824..2004831
1	rev:2004834..2004841
1	rev:2012657..2012664
1	rev:2035779..2035786
1	rev:2061011..2061018
1	rev:2089918..2089925
1	rev:2128345..2128352
1	rev:2174640..2174647
1	rev:2175762..2175769
1	rev:2200342..2200349
1	rev:2202943..2202950
1	rev:2212110..2212117
1	rev:2224545..2224552
1	rev:2242780..2242787
1	rev:2272308..2272315
1	rev:2274835..2274842
1	rev:2280911..2280918
1	rev:2281001..2281008
1	rev:2284550..2284557
1	rev:2288482..2288489
1	rev:2295013..2295020
1	rev:2301663..2301670
1	rev:2310334..2310341
1	rev:2319972..2319979
1	rev:2326098..2326105
1	rev:2330555..2330562
1	rev:2332707..2332714
1	rev:2353854..2353861
1	rev:2358853..2358860
1	rev:2402129..2402136
1	rev:2406719..2406726
1	rev:2421245..2421252
1	rev:2424301..2424308
1	rev:2430188..2430195
1	rev:2505119..2505126
1	rev:2531704..2531711
1	rev:2563974..2563981
1	rev:2573608..2573615
1	rev:2578341..2578348
1	rev:2583998..2584005
1	rev:2586635..2586642
1	rev:2601807..2601814
1	rev:2608809..2608816
1	rev:2630973..2630980
1	rev:2653880..2653887
1	rev:2659623..2659630
1	rev:2663023..2663030
1	rev:2668046..2668053
1	rev:2678764..2678771
1	rev:2679319..2679326
1	rev:2683090..2683097
1	rev:2692157..2692164
1	rev:2693026..2693033
1	rev:2768408..2768415
1	rev:2777558..2777565
1	rev:2788427..2788434
1	rev:2789213..2789220
1	rev:2805933..2805940
1	rev:2809140..2809147
1	rev:2813339..2813346
1	rev:2825750..2825757
1	rev:2838913..2838920
1	rev:2841278..2841285
1	rev:2863213..2863220
1	rev:2893980..2893987
1	rev:2912243..2912250
1	rev:2912855..2912862
1	rev:2949469..2949476
1	rev:2950041..2950048
1	rev:2957719..2957726
1	rev:2972682..2972689
1	rev:2983812..2983819
1	rev:2994480..2994487
1	rev:2997223..2997230
1	rev:3006789..3006796
1	rev:3008181..3008188
1	rev:3012132..3012139
1	rev:3025835..3025842
1	rev:3029150..3029157
1	rev:3029255..3029262
1	rev:3049905..3049912
1	rev:3068813..3068820
1	rev:3070931..3070938
1	rev:3103930..3103937
1	rev:3104783..3104790
1	rev:3114820..3114827
1	rev:3123507..3123514
1	rev:3133156..3133163
1	rev:3139105..3139112
1	rev:3169557..3169564
1	rev:3187052..3187059
2	4797..4804
2	11152..11159
2	14200..14207
2	14350..14357
2	14698..14705
2	29558..29565
2	30145..30152
2	35970..35977
2	48587..48594
2	49353..49360
2	54441..54448
2	55098..55105
2	58289..58296
2	140747..140754
2	198980..198987
2	201505..201512
2	241874..241881
2	246359..246366
2	247164..247171
2	253102..253109
2	287207..287214
2	295719..295726
2	310289..310296
2	316192..316199
2	328067..328074
2	328991..328998
2	338806..338813
2	341358..341365
2	358926..358933
2	385372..385379
2	403150..403157
2	422264..422271
2	430298..430305
2	436775..436782
2	440544..440551
2	457018..457025
2	479703..479710
2	494103..494110
2	510932..510939
2	521703..521710
2	526203..526210
2	540240..540247
2	564555..564562
2	591545..591552
2	619599..619606
2	658418..658425
2	700193..700200
2	752130..752137
2	784400..784407
2	791947..791954
2	797299..797306
2	808115..808122
2	814044..814051
2	816074..816081
2	825620..825627
2	828122..828129
2	834611..834618
2	852201..852208
2	854817..854824
2	868492..868499
2	872136..872143
2	910112..910119
2	933596..933603
2	938768..938775
2	971533..971540
2	975118..975125
2	978727..978734
2	989235..989242
2	990162..990169
2	1002392..1002399
2	1007505..1007512
2	1021146..1021153
2	1027798..1027805
2	1041178..1041185
2	1041639..1041646
2	1055774..1055781
2	1056468..1056475
2	1056738..1056745
2	1060946..1060953
2	1061234..1061241
2	1091981..1091988
2	1099334..1099341
2	1105970..1105977
2	1146255..1146262
2	1172010..1172017
2	1183505..1183512
2	1184249..1184256
2	1216352..1216359
2	1278769..1278776
2	1281377..1281384
2	1299299..1299306
2	1301988..1301995
2	1302892..1302899
2	1327236..1327243
2	1352239..1352246
2	1370778..1370785
2	1387744..1387751
2	1391273..1391280
2	1396320..1396327
2	1402379..1402386
2	1406486..1406493
2	1412796..1412803
2	1416507..1416514
2	1440273..1440280
2	1441055..1441062
2	1445968..1445975
2	1454160..1454167
2	1454510..1454517
2	1455005..1455012
2	1455071..1455078
2	1467615..1467622
2	1469729..1469736
2	1521723..1521730
2	1555950..1555957
2	1600574..1600581
2	1602590..1602597
2	1631952..1631959
2	1638895..1638902
2	1653719..1653726
2	1731589..1731596
2	1731823..1731830
2	1731915..1731922
2	1755756..1755763
2	1789680..1789687
2	1790657..1790664
2	1819813..1819820
2	1842589..1842596
2	1855514..1855521
2	1860300..1860307
2	1873463..1873470
2	1876757..1876764
2	1881440..1881447
2	1901513..1901520
2	1903223..1903230
2	1930745..1930752
2	1934282..1934289
2	1937289..1937296
2	1948128..1948135
2	1948820..1948827
2	1981169..1981176
2	1991887..1991894
2	2003234..2003241
2	2016318..2016325
2	2016446..2016453
2	2026202..2026209
2	2038957..2038964
2	2056946..2056953
2	2069505..2069512
2	2071578..2071585
2	2089877..2089884
2	2107215..2107222
2	2110463..2110470
2	2118375..2118382
2	2123851..2123858
2	2165558..2165565
2	2169931..2169938
2	2174602..2174609
2	2210882..2210889
2	2219466..2219473
2	rev:45379..45386
2	rev:70426..70433
2	rev:72745..72752
2	rev:80388..80395
2	rev:95632..95639
2	rev:97546..97553
2	rev:103099..103106
2	rev:108397..108404
2	rev:118195..118202
2	rev:119404..119411
2	rev:143000..143007
2	rev:143958..143965
2	rev:145421..145428
2	rev:167120..167127
2	rev:184125..184132
2	rev:199708..199715
2	rev:200607..200614
2	rev:207297..207304
2	rev:207975..207982
2	rev:215427..215434
2	rev:221716..221723
2	rev:241672..241679
2	rev:248595..248602
2	rev:264261..264268
2	rev:266062..266069
2	rev:280717..280724
2	rev:281617..281624
2	rev:284682..284689
2	rev:286901..286908
2	rev:310923..310930
2	rev:342641..342648
2	rev:361847..361854
2	rev:376892..376899
2	rev:387087..387094
2	rev:387819..387826
2	rev:391087..391094
2	rev:393843..393850
2	rev:397608..397615
2	rev:406304..406311
2	rev:406841..406848
2	rev:410186..410193
2	rev:413515..413522
2	rev:419424..419431
2	rev:422459..422466
2	rev:425591..425598
2	rev:444504..444511
2	rev:448116..448123
2	rev:487137..487144
2	rev:506561..506568
2	rev:536772..536779
2	rev:553038..553045
2	rev:553077..553084
2	rev:555018..555025
2	rev:559106..559113
2	rev:561326..561333
2	rev:600742..600749
2	rev:611017..611024
2	rev:614343..614350
2	rev:616953..616960
2	rev:621611..621618
2	rev:625575..625582
2	rev:627533..627540
2	rev:656893..656900
2	rev:669811..669818
2	rev:672016..672023
2	rev:726092..726099
2	rev:732842..732849
2	rev:739678..739685
2	rev:757114..757121
2	rev:764468..764475
2	rev:775300..775307
2	rev:791653..791660
2	rev:812205..812212
2	rev:832164..832171
2	rev:832239..832246
2	rev:846720..846727
2	rev:857504..857511
2	rev:860004..860011
2	rev:860520..860527
2	rev:866763..866770
2	rev:887276..887283
2	rev:891662..891669
2	rev:907323..907330
2	rev:919582..919589
2	rev:923230..923237
2	rev:926231..926238
2	rev:933154..933161
2	rev:981312..981319
2	rev:998669..998676
2	rev:1001728..1001735
2	rev:1002214..1002221
2	rev:1009376..1009383
2	rev:1036045..1036052
2	rev:1059813..1059820
2	rev:1063930..1063937
2	rev:1072592..1072599
2	rev:1093608..1093615
2	rev:1157264..1157271
2	rev:1163750..1163757
2	rev:1172915..1172922
2	rev:1178376..1178383
2	rev:1179964..1179971
2	rev:1184742..1184749
2	rev:1191502..1191509
2	rev:1204213..1204220
2	rev:1210623..1210630
2	rev:1224903..1224910
2	rev:1258762..1258769
2	rev:1288171..1288178
2	rev:1307803..1307810
2	rev:1320992..1320999
2	rev:1322257..1322264
2	rev:1334695..1334702
2	rev:1341496..1341503
2	rev:1360076..1360083
2	rev:1368344..1368351
2	rev:1372414..1372421
2	rev:1375194..1375201
2	rev:1376706..1376713
2	rev:1401287..1401294
2	rev:1421413..1421420
2	rev:1426178..1426185
2	rev:1430376..1430383
2	rev:1430929..1430936
2	rev:1472359..1472366
2	rev:1506261..1506268
2	rev:1508803..1508810
2	rev:1516778..1516785
2	rev:1557044..1557051
2	rev:1574602..1574609
2	rev:1595047..1595054
2	rev:1631026..1631033
2	rev:1635272..1635279
2	rev:1654162..1654169
2	rev:1689311..1689318
2	rev:1696606..1696613
2	rev:1706827..1706834
2	rev:1735792..1735799
2	rev:1737937..1737944
2	rev:1749537..1749544
2	rev:1755394..1755401
2	rev:1760997..1761004
2	rev:1784990..1784997
2	rev:1789733..1789740
2	rev:1804830..1804837
2	rev:1845893..1845900
2	rev:1845945..1845952
2	rev:1846922..1846929
2	rev:1847019..1847026
2	rev:1850272..1850279
2	rev:1857659..1857666
2	rev:1877277..1877284
2	rev:1907288..1907295
2	rev:1911666..1911673
2	rev:1922535..1922542
2	rev:1986575..1986582
2	rev:1987658..1987665
2	rev:1992269..1992276
2	rev:1993320..1993327
2	rev:2018573..2018580
2	rev:2054840..2054847
2	rev:2058097..2058104
2	rev:2073452..2073459
2	rev:2093272..2093279
2	rev:2093553..2093560
2	rev:2099431..2099438
2	rev:2102827..2102834
2	rev:2108908..2108915
2	rev:2111996..2112003
2	rev:2131136..2131143
2	rev:2152687..2152694
2	rev:2155054..2155061
2	rev:2156242..2156249
2	rev:2193676..2193683
2	rev:2197630..2197637
2	rev:2213306..2213313
2	rev:2213561..2213568
2	rev:2225917..2225924
3	3970..3977
3	14284..14291
3	18752..18759
3	30785..30792
3	39121..39128
3	58843..58850
3	64681..64688
3	65725..65732
3	68217..68224
3	68422..68429
3	83438..83445
3	159098..159105
3	166867..166874
3	188932..188939
3	207365..207372
3	228753..228760
3	236899..236906
3	238935..238942
3	245525..245532
3	274234..274241
3	278376..278383
3	283021..283028
3	285292..285299
3	292122..292129
3	292134..292141
3	297623..297630
3	314924..314931
3	316822..316829
3	329711..329718
3	332955..332962
3	335756..335763
3	342302..342309
3	343832..343839
3	383508..383515
3	411760..411767
3	414770..414777
3	414905..414912
3	422909..422916
3	433319..433326
3	468381..468388
3	473437..473444
3	488390..488397
3	497593..497600
3	499874..499881
3	517455..517462
3	537253..537260
3	543777..543784
3	546589..546596
3	578772..578779
3	630604..630611
3	654786..654793
3	684681..684688
3	723636..723643
3	726859..726866
3	728264..728271
3	759419..759426
3	769073..769080
3	793629..793636
3	805159..805166
3	836264..836271
3	840508..840515
3	851925..851932
3	863194..863201
3	865593..865600
3	889541..889548
3	889726..889733
3	910386..910393
3	1023473..1023480
3	1025338..1025345
3	1033020..1033027
3	1040781..1040788
3	1041891..1041898
3	1055858..1055865
3	1056613..1056620
3	1069652..1069659
3	1077462..1077469
3	1096383..1096390
3	1106784..1106791
3	1134037..1134044
3	1144864..1144871
3	1152810..1152817
3	1168466..1168473
3	1170177..1170184
3	1193252..1193259
3	1200998..1201005
3	1211114..1211121
3	1219203..1219210
3	1219973..1219980
3	1226739..1226746
3	1246954..1246961
3	1266195..1266202
3	1266984..1266991
3	1271537..1271544
3	1282084..1282091
3	1283790..1283797
3	1286466..1286473
3	1311794..1311801
3	1315767..1315774
3	1321303..1321310
3	1325335..1325342
3	1332286..1332293
3	1361433..1361440
3	1375895..1375902
3	1387812..1387819
3	1392228..1392235
3	1417906..1417913
3	1439784..1439791
3	1458962..1458969
3	1493879..1493886
3	1528307..1528314
3	1552459..1552466
3	1556433..1556440
3	1573596..1573603
3	1582670..1582677
3	1584259..1584266
3	1586219..1586226
3	1617522..1617529
3	1626911..1626918
3	1637062..1637069
3	1639902..1639909
3	1664638..1664645
3	1678710..1678717
3	1693971..1693978
3	1699045..1699052
3	1718821..1718828
3	1726136..1726143
3	1735714..1735721
3	1741202..1741209
3	1742453..1742460
3	rev:46609..46616
3	rev:47347..47354
3	rev:52041..52048
3	rev:112579..112586
3	rev:127460..127467
3	rev:143313..143320
3	rev:149342..149349
3	rev:184838..184845
3	rev:197614..197621
3	rev:210604..210611
3	rev:210667..210674
3	rev:211087..211094
3	rev:235739..235746
3	rev:237283..237290
3	rev:255334..255341
3	rev:259169..259176
3	rev:271620..271627
3	rev:285677..285684
3	rev:302375..302382
3	rev:321383..321390
3	rev:327616..327623
3	rev:332458..332465
3	rev:343195..343202
3	rev:352557..352564
3	rev:354299..354306
3	rev:360506..360513
3	rev:369424..369431
3	rev:375376..375383
3	rev:381842..381849
3	rev:387763..387770
3	rev:389006..389013
3	rev:408255..408262
3	rev:425013..425020
3	rev:438211..438218
3	rev:457834..457841
3	rev:460958..460965
3	rev:497886..497893
3	rev:508655..508662
3	rev:511971..511978
3	rev:516810..516817
3	rev:517553..517560
3	rev:527075..527082
3	rev:608160..608167
3	rev:686160..686167
3	rev:711145..711152
3	rev:725333..725340
3	rev:742485..742492
3	rev:770844..770851
3	rev:774556..774563
3	rev:792208..792215
3	rev:792874..792881
3	rev:855278..855285
3	rev:857673..857680
3	rev:858343..858350
3	rev:865065..865072
3	rev:902017..902024
3	rev:906931..906938
3	rev:917712..917719
3	rev:947965..947972
3	rev:963409..963416
3	rev:963818..963825
3	rev:964760..964767
3	rev:968673..968680
3	rev:1037658..1037665
3	rev:1046443..1046450
3	rev:1063253..1063260
3	rev:1102806..1102813
3	rev:1113792..1113799
3	rev:1117493..1117500
3	rev:1121027..1121034
3	rev:1122928..1122935
3	rev:1157851..1157858
3	rev:1162449..1162456
3	rev:1179286..1179293
3	rev:1215875..1215882
3	rev:1220758..1220765
3	rev:1230899..1230906
3	rev:1246181..1246188
3	rev:1246594..1246601
3	rev:1259800..1259807
3	rev:1264282..1264289
3	rev:1266563..1266570
3	rev:1290596..1290603
3	rev:1292421..1292428
3	rev:1304028..1304035
3	rev:1311294..1311301
3	rev:1322807..1322814
3	rev:1359739..1359746
3	rev:1375650..1375657
3	rev:1377878..1377885
3	rev:1395345..1395352
3	rev:1399390..1399397
3	rev:1400134..1400141
3	rev:1436140..1436147
3	rev:1446666..1446673
3	rev:1467555..1467562
3	rev:1484268..1484275
3	rev:1485914..1485921
3	rev:1504523..1504530
3	rev:1515094..1515101
3	rev:1524392..1524399
3	rev:1527024..1527031
3	rev:1535480..1535487
3	rev:1535657..1535664
3	rev:1536986..1536993
3	rev:1537583..1537590
3	rev:1544740..1544747
3	rev:1577912..1577919
3	rev:1602880..1602887
3	rev:1603613..1603620
3	rev:1615933..1615940
3	rev:1621826..1621833
3	rev:1636063..1636070
3	rev:1636995..1637002
3	rev:1638976..1638983
3	rev:1687987..1687994
3	rev:1706382..1706389
3	rev:1718949..1718956
3	rev:1763642..1763649
3	rev:1772178..1772185
3	rev:1782425..1782432
3	rev:1783171..1783178
3	rev:1792787..1792794
3	rev:1794662..1794669
3	rev:1797531..1797538
4	2611..2618
4	19546..19553
4	20743..20750
4	45188..45195
4	70445..70452
4	73251..73258
4	78379..78386
4	93106..93113
4	94452..94459
4	126652..126659
4	134515..134522
4	140136..140143
4	156739..156746
4	171290..171297
4	178482..178489
4	186575..186582
4	228101..228108
4	228303..228310
4	244426..244433
4	247961..247968
4	255620..255627
4	261530..261537
4	272787..272794
4	278804..278811
4	294510..294517
4	318099..318106
4	320168..320175
4	335580..335587
4	349318..349325
4	360637..360644
4	361502..361509
4	367541..367548
4	374749..374756
4	389633..389640
4	390162..390169
4	398063..398070
4	403802..403809
4	406931..406938
4	412463..412470
4	419501..419508
4	421801..421808
4	428695..428702
4	445665..445672
4	464852..464859
4	505200..505207
4	509057..509064
4	514376..514383
4	523605..523612
4	540398..540405
4	548519..548526
4	571244..571251
4	583242..583249
4	596739..596746
4	603184..603191
4	644573..644580
4	647098..647105
4	652918..652925
4	653020..653027
4	696935..696942
4	701183..701190
4	749949..749956
4	763676..763683
4	779265..779272
4	787053..787060
4	787927..787934
4	793416..793423
4	809800..809807
4	813081..813088
4	828711..828718
4	828939..828946
4	842292..842299
4	845499..845506
4	847858..847865
4	848042..848049
4	886465..886472
4	895581..895588
4	896608..896615
4	897369..897376
4	901094..901101
4	905870..905877
4	962537..962544
4	978765..978772
4	988424..988431
4	990033..990040
4	996320..996327
4	996889..996896
4	1005869..1005876
4	1031641..1031648
4	1033209..1033216
4	1036179..1036186
4	1062730..1062737
4	1082401..1082408
4	1096957..1096964
4	1119803..1119810
4	1122125..1122132
4	1123660..1123667
4	1138911..1138918
4	1138995..1139002
4	1189518..1189525
4	1235781..1235788
4	1236197..1236204
4	1236398..1236405
4	1237491..1237498
4	1250081..1250088
4	1266839..1266846
4	1271376..1271383
4	1299167..1299174
4	1355944..1355951
4	1358588..1358595
4	1378405..1378412
4	1386641..1386648
4	1441496..1441503
4	1442275..1442282
4	1465841..1465848
4	1474272..1474279
4	1517391..1517398
4	1526220..1526227
4	1534899..1534906
4	1546407..1546414
4	1564809..1564816
4	1566852..1566859
4	1569262..1569269
4	1584342..1584349
4	1594024..1594031
4	rev:20002..20009
4	rev:33231..33238
4	rev:41867..41874
4	rev:52027..52034
4	rev:62258..62265
4	rev:113351..113358
4	rev:117033..117040
4	rev:150637..150644
4	rev:152136..152143
4	rev:159884..159891
4	rev:167670..167677
4	rev:172990..172997
4	rev:175524..175531
4	rev:179282..179289
4	rev:183899..183906
4	rev:197986..197993
4	rev:199834..199841
4	rev:212790..212797
4	rev:213933..213940
4	rev:218764..218771
4	rev:220511..220518
4	rev:243857..243864
4	rev:251985..251992
4	rev:256199..256206
4	rev:261141..261148
4	rev:289389..289396
4	rev:300073..300080
4	rev:304960..304967
4	rev:306508..306515
4	rev:327511..327518
4	rev:375464..375471
4	rev:397177..397184
4	rev:416983..416990
4	rev:437728..437735
4	rev:489802..489809
4	rev:507062..507069
4	rev:509768..509775
4	rev:523773..523780
4	rev:543995..544002
4	rev:546712..546719
4	rev:557427..557434
4	rev:560036..560043
4	rev:580849..580856
4	rev:587612..587619
4	rev:615121..615128
4	rev:629298..629305
4	rev:629980..629987
4	rev:631610..631617
4	rev:632678..632685
4	rev:647424..647431
4	rev:681833..681840
4	rev:685787..685794
4	rev:697501..697508
4	rev:713653..713660
4	rev:726814..726821
4	rev:734954..734961
4	rev:743196..743203
4	rev:760095..760102
4	rev:782011..782018
4	rev:809616..809623
4	rev:814647..814654
4	rev:817580..817587
4	rev:831223..831230
4	rev:834087..834094
4	rev:852639..852646
4	rev:853565..853572
4	rev:855727..855734
4	rev:857754..857761
4	rev:858667..858674
4	rev:868188..868195
4	rev:893750..893757
4	rev:918049..918056
4	rev:951517..951524
4	rev:958543..958550
4	rev:960155..960162
4	rev:969502..969509
4	rev:973263..973270
4	rev:975232..975239
4	rev:1027773..1027780
4	rev:1028046..1028053
4	rev:1041440..1041447
4	rev:1044945..1044952
4	rev:1046908..1046915
4	rev:1060039..1060046
4	rev:1067047..1067054
4	rev:1079216..1079223
4	rev:1132354..1132361
4	rev:1137920..1137927
4	rev:1151467..1151474
4	rev:1152437..1152444
4	rev:1157177..1157184
4	rev:1208209..1208216
4	rev:1209997..1210004
4	rev:1211096..1211103
4	rev:1223843..1223850
4	rev:1251502..1251509
4	rev:1273588..1273595
4	rev:1278314..1278321
4	rev:1281662..1281669
4	rev:1307821..1307828
4	rev:1316234..1316241
4	rev:1319339..1319346
4	rev:1325305..1325312
4	rev:1336930..1336937
4	rev:1363753..1363760
4	rev:1370936..1370943
4	rev:1382281..1382288
4	rev:1409285..1409292
4	rev:1428728..1428735
4	rev:1434040..1434047
4	rev:1437515..1437522
4	rev:1456965..1456972
4	rev:1465747..1465754
4	rev:1472471..1472478
4	rev:1473158..1473165
4	rev:1487931..1487938
4	rev:1488500..1488507
4	rev:1504305..1504312
4	rev:1505947..1505954
4	rev:1509192..1509199
4	rev:1515352..1515359
4	rev:1536273..1536280
4	rev:1543002..1543009
4	rev:1555235..1555242
4	rev:1566152..1566159
4	rev:1581090..1581097
4	rev:1581660..1581667
4	rev:1582619..1582626
4	rev:1589138..1589145
5	180..187
5	2446..2453
5	11461..11468
5	12813..12820
5	13818..13825
5	25219..25226
5	31255..31262
5	34208..34215
5	55864..55871
5	58900..58907
5	76132..76139
5	80188..80195
5	100996..101003
5	114203..114210
5	114693..114700
5	119304..119311
5	134752..134759
5	148696..148703
5	151350..151357
5	178443..178450
5	182082..182089
5	213566..213573
5	214720..214727
5	241674..241681
5	262269..262276
5	276636..276643
5	279565..279572
5	288789..288796
5	297079..297086
5	311479..311486
5	321888..321895
5	339521..339528
5	348013..348020
5	352862..352869
5	352964..352971
5	369218..369225
5	372136..372143
5	382735..382742
5	387312..387319
5	389191..389198
5	400871..400878
5	436026..436033
5	436173..436180
5	439212..439219
5	441439..441446
5	444057..444064
5	449528..449535
5	453794..453801
5	465080..465087
5	465494..465501
5	490850..490857
5	551042..551049
5	555379..555386
5	558976..558983
5	565052..565059
5	571813..571820
5	578898..578905
5	584649..584656
5	586907..586914
5	590514..590521
5	595711..595718
5	607911..607918
5	614426..614433
5	634473..634480
5	656004..656011
5	662179..662186
5	697822..697829
5	736713..736720
5	756227..756234
5	803075..803082
5	821121..821128
5	825205..825212
5	830105..830112
5	860207..860214
5	867979..867986
5	922719..922726
5	932170..932177
5	952444..952451
5	956330..956337
5	962713..962720
5	962906..962913
5	979744..979751
5	998157..998164
5	999375..999382
5	1000129..1000136
5	1005590..1005597
5	1005926..1005933
5	1006067..1006074
5	1007211..1007218
5	1040453..1040460
5	1040810..1040817
5	1044365..1044372
5	1070105..1070112
5	1087001..1087008
5	1095507..1095514
5	1160710..1160717
5	1163181..1163188
5	1164216..1164223
5	rev:18207..18214
5	rev:23457..23464
5	rev:35135..35142
5	rev:41015..41022
5	rev:55392..55399
5	rev:73975..73982
5	rev:84461..84468
5	rev:86652..86659
5	rev:87731..87738
5	rev:95806..95813
5	rev:107670..107677
5	rev:108625..108632
5	rev:119855..119862
5	rev:127567..127574
5	rev:164985..164992
5	rev:171501..171508
5	rev:198382..198389
5	rev:200625..200632
5	rev:257820..257827
5	rev:262353..262360
5	rev:262478..262485
5	rev:280025..280032
5	rev:282661..282668
5	rev:284031..284038
5	rev:313612..313619
5	rev:318229..318236
5	rev:354937..354944
5	rev:377262..377269
5	rev:385029..385036
5	rev:387583..387590
5	rev:417101..417108
5	rev:443697..443704
5	rev:450128..450135
5	rev:461958..461965
5	rev:496340..496347
5	rev:504284..504291
5	rev:526352..526359
5	rev:530821..530828
5	rev:550799..550806
5	rev:551443..551450
5	rev:553827..553834
5	rev:566397..566404
5	rev:574433..574440
5	rev:610603..610610
5	rev:616763..616770
5	rev:630612..630619
5	rev:657288..657295
5	rev:657813..657820
5	rev:663030..663037
5	rev:664859..664866
5	rev:667885..667892
5	rev:668847..668854
5	rev:681792..681799
5	rev:682176..682183
5	rev:691281..691288
5	rev:694813..694820
5	rev:710736..710743
5	rev:719650..719657
5	rev:743217..743224
5	rev:751790..751797
5	rev:760064..760071
5	rev:762511..762518
5	rev:770795..770802
5	rev:774247..774254
5	rev:840412..840419
5	rev:840731..840738
5	rev:846708..846715
5	rev:848488..848495
5	rev:850807..850814
5	rev:867346..867353
5	rev:877815..877822
5	rev:878040..878047
5	rev:878978..878985
5	rev:881258..881265
5	rev:885954..885961
5	rev:914160..914167
5	rev:925333..925340
5	rev:927837..927844
5	rev:928700..928707
5	rev:940132..940139
5	rev:984596..984603
5	rev:989224..989231
5	rev:1005545..1005552
5	rev:1041440..1041447
5	rev:1042313..1042320
5	rev:1048416..1048423
5	rev:1063444..1063451
5	rev:1083484..1083491
5	rev:1085129..1085136
5	rev:1090841..1090848
5	rev:1097570..1097577
5	rev:1099287..1099294
5	rev:1117406..1117413
5	rev:1128098..1128105
5	rev:1146155..1146162
5	rev:1154162..1154169
5	rev:1161352..1161359
5	rev:1168122..1168129
5	rev:1176952..1176959
6	16016..16023
6	23436..23443
6	64668..64675
6	65343..65350
6	81638..81645
6	85795..85802
6	92739..92746
6	107085..107092
6	107121..107128
6	135238..135245
6	141170..141177
6	149338..149345
6	158435..158442
6	170199..170206
6	171180..171187
6	178861..178868
6	187492..187499
6	188335..188342
6	227877..227884
6	241504..241511
6	250982..250989
6	257548..257555
6	278060..278067
6	292394..292401
6	295716..295723
6	310727..310734
6	314701..314708
6	334016..334023
6	340798..340805
6	342773..342780
6	411683..411690
6	431199..431206
6	450445..450452
6	467673..467680
6	474839..474846
6	478280..478287
6	494539..494546
6	503202..503209
6	517104..517111
6	522274..522281
6	540715..540722
6	573826..573833
6	590404..590411
6	600328..600335
6	600886..600893
6	611870..611877
6	614540..614547
6	647094..647101
6	675661..675668
6	687140..687147
6	724590..724597
6	725369..725376
6	728901..728908
6	817660..817667
6	830576..830583
6	837559..837566
6	848817..848824
6	861336..861343
6	863693..863700
6	888227..888234
6	890095..890102
6	915671..915678
6	930783..930790
6	970838..970845
6	981543..981550
6	985418..985425
6	1026526..1026533
6	rev:26172..26179
6	rev:68092..68099
6	rev:105586..105593
6	rev:132396..132403
6	rev:156190..156197
6	rev:217876..217883
6	rev:223446..223453
6	rev:234035..234042
6	rev:257464..257471
6	rev:259747..259754
6	rev:261202..261209
6	rev:261644..261651
6	rev:291113..291120
6	rev:294158..294165
6	rev:306390..306397
6	rev:330229..330236
6	rev:335489..335496
6	rev:337374..337381
6	rev:348773..348780
6	rev:356864..356871
6	rev:383764..383771
6	rev:383953..383960
6	rev:401000..401007
6	rev:408162..408169
6	rev:424616..424623
6	rev:448784..448791
6	rev:449638..449645
6	rev:458890..458897
6	rev:459419..459426
6	rev:465457..465464
6	rev:471051..471058
6	rev:483885..483892
6	rev:485603..485610
6	rev:486883..486890
6	rev:486931..486938
6	rev:487080..487087
6	rev:498909..498916
6	rev:506243..506250
6	rev:515408..515415
6	rev:570247..570254
6	rev:570256..570263
6	rev:575810..575817
6	rev:589803..589810
6	rev:592385..592392
6	rev:603803..603810
6	rev:607839..607846
6	rev:618477..618484
6	rev:648149..648156
6	rev:679034..679041
6	rev:681727..681734
6	rev:684241..684248
6	rev:711249..711256
6	rev:742234..742241
6	rev:765969..765976
6	rev:775161..775168
6	rev:804326..804333
6	rev:819494..819501
6	rev:825307..825314
6	rev:826239..826246
6	rev:829788..829795
6	rev:880626..880633
6	rev:887497..887504
6	rev:887989..887996
6	rev:944903..944910
6	rev:949048..949055
6	rev:988965..988972
6	rev:1006077..1006084
6	rev:1006520..1006527
6	rev:1007052..1007059
6	rev:1007126..1007133
6	rev:1008276..1008283
6	rev:1020721..1020728
6	rev:1028828..1028835
7	8232..8239
7	23402..23409
7	58860..58867
7	65853..65860
7	88909..88916
7	88999..89006
7	114547..114554
7	121692..121699
7	124983..124990
7	180735..180742
7	184149..184156
7	186543..186550
7	211386..211393
7	215585..215592
7	224653..224660
7	224973..224980
7	227684..227691
7	228965..228972
7	231326..231333
7	250924..250931
7	270890..270897
7	273065..273072
7	282123..282130
7	287032..287039
7	298356..298363
7	308966..308973
7	316311..316318
7	340535..340542
7	385011..385018
7	478722..478729
7	486807..486814
7	511708..511715
7	549367..549374
7	555789..555796
7	556098..556105
7	560504..560511
7	567920..567927
7	573341..573348
7	576337..576344
7	598105..598112
7	624872..624879
7	634418..634425
7	637293..637300
7	666566..666573
7	667007..667014
7	692936..692943
7	693480..693487
7	720953..720960
7	736130..736137
7	736541..736548
7	746367..746374
7	762285..762292
7	794305..794312
7	805350..805357
7	813075..813082
7	814755..814762
7	823654..823661
7	826136..826143
7	829537..829544
7	843365..843372
7	871309..871316
7	878313..878320
7	887121..887128
7	889556..889563
7	892136..892143
7	912412..912419
7	919005..919012
7	rev:1257..1264
7	rev:11952..11959
7	rev:22668..22675
7	rev:40516..40523
7	rev:93411..93418
7	rev:93552..93559
7	rev:124442..124449
7	rev:129262..129269
7	rev:129361..129368
7	rev:187525..187532
7	rev:187597..187604
7	rev:199751..199758
7	rev:218080..218087
7	rev:224313..224320
7	rev:245254..245261
7	rev:250484..250491
7	rev:257924..257931
7	rev:259153..259160
7	rev:261197..261204
7	rev:282822..282829
7	rev:297897..297904
7	rev:303527..303534
7	rev:323639..323646
7	rev:330401..330408
7	rev:330435..330442
7	rev:335706..335713
7	rev:340272..340279
7	rev:350142..350149
7	rev:352736..352743
7	rev:363057..363064
7	rev:371001..371008
7	rev:381784..381791
7	rev:391058..391065
7	rev:398830..398837
7	rev:411530..411537
7	rev:434953..434960
7	rev:440111..440118
7	rev:440171..440178
7	rev:440183..440190
7	rev:441641..441648
7	rev:446955..446962
7	rev:472342..472349
7	rev:473283..473290
7	rev:489723..489730
7	rev:490864..490871
7	rev:500822..500829
7	rev:534310..534317
7	rev:545067..545074
7	rev:545688..545695
7	rev:562174..562181
7	rev:570320..570327
7	rev:573715..573722
7	rev:588894..588901
7	rev:608302..608309
7	rev:615420..615427
7	rev:616350..616357
7	rev:630022..630029
7	rev:631558..631565
7	rev:635104..635111
7	rev:640801..640808
7	rev:651357..651364
7	rev:668569..668576
7	rev:712552..712559
7	rev:721163..721170
7	rev:721684..721691
7	rev:725246..725253
7	rev:757444..757451
7	rev:770364..770371
7	rev:777235..777242
7	rev:778853..778860
7	rev:784783..784790
7	rev:803753..803760
7	rev:820661..820668
7	rev:824509..824516
7	rev:847370..847377
7	rev:872038..872045
7	rev:875393..875400
7	rev:875981..875988
7	rev:901455..901462
7	rev:920840..920847
7	rev:942446..942453
R	6237..6244
R	7741..7748
R	51142..51149
R	54406..54413
R	68041..68048
R	108298..108305
R	111434..111441
R	118029..118036
R	124261..124268
R	125068..125075
R	126477..126484
R	151849..151856
R	172272..172279
R	182348..182355
R	194640..194647
R	204099..204106
R	212635..212642
R	212850..212857
R	214800..214807
R	218512..218519
R	218689..218696
R	222230..222237
R	222997..223004
R	237544..237551
R	245739..245746
R	254432..254439
R	259955..259962
R	265990..265997
R	266789..266796
R	279073..279080
R	286348..286355
R	312274..312281
R	332068..332075
R	372015..372022
R	387022..387029
R	395385..395392
R	405121..405128
R	406748..406755
R	440252..440259
R	449939..449946
R	488750..488757
R	533471..533478
R	542109..542116
R	579960..579967
R	584472..584479
R	616114..616121
R	640168..640175
R	649760..649767
R	659169..659176
R	687145..687152
R	722748..722755
R	729686..729693
R	731420..731427
R	755190..755197
R	795533..795540
R	798718..798725
R	855700..855707
R	894619..894626
R	899901..899908
R	915607..915614
R	931470..931477
R	950099..950106
R	960945..960952
R	968982..968989
R	971934..971941
R	975978..975985
R	1029035..1029042
R	1029971..1029978
R	1031792..1031799
R	1040952..1040959
R	1061965..1061972
R	1062279..1062286
R	1066407..1066414
R	1068023..1068030
R	1072022..1072029
R	1077975..1077982
R	1097686..1097693
R	1112298..1112305
R	1159122..1159129
R	1165661..1165668
R	1178698..1178705
R	1184933..1184940
R	1196106..1196113
R	1220712..1220719
R	1280782..1280789
R	1288748..1288755
R	1320216..1320223
R	1322906..1322913
R	1336197..1336204
R	1344470..1344477
R	1347088..1347095
R	1360939..1360946
R	1372352..1372359
R	1375539..1375546
R	1375835..1375842
R	1387896..1387903
R	1451389..1451396
R	1454618..1454625
R	1494362..1494369
R	1499999..1500006
R	1514601..1514608
R	1519215..1519222
R	1552278..1552285
R	1559033..1559040
R	1564383..1564390
R	1584554..1584561
R	1607103..1607110
R	1615609..1615616
R	1619580..1619587
R	1630639..1630646
R	1644237..1644244
R	1647735..1647742
R	1657182..1657189
R	1680167..1680174
R	1680392..1680399
R	1713528..1713535
R	1751742..1751749
R	1776217..1776224
R	1790013..1790020
R	1805010..1805017
R	1816189..1816196
R	1842510..1842517
R	1851217..1851224
R	1857465..1857472
R	1886424..1886431
R	1923024..1923031
R	1923899..1923906
R	1934632..1934639
R	1942832..1942839
R	1967174..1967181
R	1979514..1979521
R	2029879..2029886
R	2029921..2029928
R	2030935..2030942
R	2042726..2042733
R	2044611..2044618
R	2048375..2048382
R	2063912..2063919
R	2067154..2067161
R	2083417..2083424
R	2096094..2096101
R	2103167..2103174
R	2110426..2110433
R	2117780..2117787
R	2127087..2127094
R	2129356..2129363
R	2136276..2136283
R	2162791..2162798
R	2206710..2206717
R	2240812..2240819
R	2249902..2249909
R	2273282..2273289
R	2282988..2282995
R	2283189..2283196
R	rev:35360..35367
R	rev:42690..42697
R	rev:47305..47312
R	rev:61791..61798
R	rev:64425..64432
R	rev:66408..66415
R	rev:66477..66484
R	rev:77500..77507
R	rev:94657..94664
R	rev:95131..95138
R	rev:95990..95997
R	rev:140589..140596
R	rev:153055..153062
R	rev:161889..161896
R	rev:190792..190799
R	rev:197422..197429
R	rev:216155..216162
R	rev:247815..247822
R	rev:257052..257059
R	rev:259977..259984
R	rev:270434..270441
R	rev:278751..278758
R	rev:311644..311651
R	rev:316812..316819
R	rev:319126..319133
R	rev:328962..328969
R	rev:330529..330536
R	rev:330929..330936
R	rev:424414..424421
R	rev:437994..438001
R	rev:460880..460887
R	rev:485825..485832
R	rev:492670..492677
[truncated: 161 more rows]

## Sheet: 9-mer-CTAACTTCT
Chromosome	Position
1	76838..76846		Occurences of CTAACTTCT across all 8 chromosomes of SC5314
1	112769..112777		rev: = reverse complement
1	125885..125893
1	563220..563228
1	615173..615181
1	809207..809215
1	875852..875860
1	1015544..1015552
1	1063801..1063809
1	1235392..1235400
1	1253693..1253701
1	1318639..1318647
1	1337308..1337316
1	1340902..1340910
1	1367081..1367089
1	1667698..1667706
1	1815707..1815715
1	1871634..1871642
1	1905587..1905595
1	2204838..2204846
1	2279763..2279771
1	2495524..2495532
1	2731536..2731544
1	2835138..2835146
1	2883548..2883556
1	3133243..3133251
1	3161440..3161448
1	3181836..3181844
1	rev:94864..94872
1	rev:249594..249602
1	rev:301641..301649
1	rev:365789..365797
1	rev:384016..384024
1	rev:460390..460398
1	rev:515123..515131
1	rev:517755..517763
1	rev:945582..945590
1	rev:1039039..1039047
1	rev:1070905..1070913
1	rev:1194811..1194819
1	rev:1296893..1296901
1	rev:1338556..1338564
1	rev:1536238..1536246
1	rev:1608119..1608127
1	rev:1645585..1645593
1	rev:1898185..1898193
1	rev:2004825..2004833
1	rev:2012658..2012666
1	rev:2295014..2295022
1	rev:2456803..2456811
1	rev:2586636..2586644
1	rev:2759222..2759230
1	rev:3066183..3066191
1	rev:3114821..3114829
2	125575..125583
2	287205..287213
2	422262..422270
2	430296..430304
2	440542..440550
2	955008..955016
2	989233..989241
2	990160..990168
2	1021144..1021152
2	1209959..1209967
2	1402377..1402385
2	1469727..1469735
2	1479979..1479987
2	1842587..1842595
2	1855512..1855520
2	1902636..1902644
2	1948818..1948826
2	2069503..2069511
2	2071576..2071584
2	2174600..2174608
2	rev:70427..70435
2	rev:145422..14543
2	rev:167121..16712
2	rev:243408..24341
2	rev:424609..42461
2	rev:726093..72610
2	rev:792109..79211
2	rev:939320..93932
2	rev:1344872..1344
2	rev:1368345..1368
2	rev:1421414..1421
2	rev:1595048..1595
2	rev:1635273..1635
2	rev:1679083..1679
2	rev:1689312..1689
2	rev:1804831..1804
2	rev:1911667..1911
2	rev:2108336..2108
2	rev:2225918..2225
3	207363..207371
3	283019..283027
3	332953..332961
3	335754..335762
3	1040779..1040787
3	1219971..1219979
3	1226737..1226745
3	1271535..1271543
3	1321301..1321309
3	1458960..1458968
3	1520442..1520450
3	rev:235740..235748
3	rev:302376..302384
3	rev:380616..380624
3	rev:517554..517562
3	rev:774557..774565
3	rev:1157852..1157860
3	rev:1215876..1215884
3	rev:1220759..1220767
3	rev:1336409..1336417
3	rev:1441902..1441910
3	rev:1537584..1537592
3	rev:1602881..1602889
3	rev:1782426..1782434
3	rev:1792788..1792796
4	2609..2617
4	78377..78385
4	278802..278810
4	294508..294516
4	320166..320174
4	369361..369369
4	428693..428701
4	523596..523611
4	704160..704168
4	895579..895587
4	1121297..1121305
4	1138909..1138917
4	1271374..1271382
4	1486824..1486832
4	rev:113352..113360
4	rev:261142..261150
4	rev:327512..327520
4	rev:437729..437737
4	rev:647371..647379
4	rev:671336..671344
4	rev:760096..760104
4	rev:782012..782020
4	rev:817581..817589
4	rev:855728..855736
4	rev:893751..893759
4	rev:973264..973272
4	rev:1046909..1046917
4	rev:1226644..1226652
4	rev:1437516..1437524
4	rev:1473159..1473167
4	rev:1600828..1600836
5	178..186
5	119302..119310
5	352962..352970
5	387310..387318
5	453792..453800
5	560666..560674
5	619561..619569
5	825203..825211
5	926606..926614
5	1006065..1006073
5	1040808..1040816
5	1044363..1044371
5	1086999..1087007
5	1154445..1154453
5	rev:284032..284040
5	rev:551444..551452
5	rev:630613..630621
5	rev:636670..636678
5	rev:664860..664868
5	rev:840413..840421
5	rev:928701..928709
5	rev:984597..984605
5	rev:1052792..1052800
5	rev:1168123..1168131
6	170197..170205
6	241502..241510
6	244790..244798
6	494537..494545
6	611868..611876
6	724588..724596
6	725367..725375
6	728899..728907
6	rev:151312..151320
6	rev:189440..189448
6	rev:330230..330238
6	rev:458891..458899
6	rev:465458..465466
6	rev:738781..738789
6	rev:819495..819503
6	rev:826240..826248
6	rev:880882..880890
7	88997..89005
7	114545..114553
7	211384..211392
7	250922..250930
7	316309..316317
7	592534..592542
7	rev:187598..187606
7	rev:380542..380550
7	rev:397644..397652
7	rev:434954..434962
7	rev:446956..446964
7	rev:597904..597912
7	rev:629149..629157
7	rev:640802..640810
7	rev:820662..820670
7	rev:847371..847379
R	54404..54412
R	111432..111440
R	126475..126483
R	172270..172278
R	275287..275295
R	395383..395391
R	440250..440258
R	443017..443025
R	729684..729692
R	1031864..1031872
R	1062277..1062285
R	1499997..1500005
R	1552276..1552284
R	1657180..1657188
R	1734471..1734479
R	1805008..1805016
R	1967172..1967180
R	2010366..2010374
R	2023453..2023461
R	2117402..2117410
R	2244892..2244900
R	2273280..2273288
R	rev:42691..42699
R	rev:77501..77509
R	rev:197423..197431
R	rev:216156..216164
R	rev:319997..320005
R	rev:328963..328971
R	rev:524793..524801
R	rev:543196..543204
R	rev:614958..614966
R	rev:625470..625478
R	rev:658689..658697
R	rev:666994..667002
R	rev:676223..676231
R	rev:676290..676298
R	rev:1154130..1154138
R	rev:1233049..1233057
R	rev:1289658..1289666
R	rev:1658105..1658113
R	rev:1669708..1669716
R	rev:1689505..1689513
R	rev:1986529..1986537
