# Supplementary material for: Genome plasticity in Candida albicans is driven by long repeat sequences
Source: eLife journal article supplement (doi:10.7554/elife.45954), 2019-06-07
Supplement: supp [file elife-45954-supp-v1.zip › elife_poa_e45954_Supplementary_File_6.xlsx]

## Sheet: Todd_Supplementary File 6
Isolate	INTRA or INTER	Repeat Family Number	General Feature Present	Repetive Gene (ALS/PGA/etc)	Copies per Genome	Chromosome Sequence 1	Start Sequence 1	End Sequence 1	Chromosome Sequence 2	Start Sequence 2	End Sequence 2	Copy Length Sequence 1	Copy Length Sequence 2	Spacer Length	Repeat Type	Identity	Gene Features in Sequence 1	Corresponding Gene Features in Sequence 2	Unnanotated Intergenic Sequence	LOH Breakpoint	CNV Breakpoint	Sequence Inversion	Reference
P78048	INTRA	58	ORF		2	1	2271519	2274379	1	2335801	2332942	2861	2860	58563	Inverted	96.47	Characterized orf19.4899 (GCA1)	Characterized orf19.1999 (GCA2)				INVERSION	Hirakawa et al., 2015
P37039	INTRA	65	ORF		2	1	2807633	2808952	1	2803488	2802155	1320	1334	6797	Inverted	93.78	Uncharacterized orf19.4921	Uncharacterized orf19.4916, Uncharacterized orf19.4917				INVERSION	Hirakawa et al., 2015
P78048	INTRA	86	ORF		2	2	532066	536187	2	589663	585677	4122	3987	49490	Inverted	96.19	Uncharacterized orf19.1589, Uncharacterized orf19.5842	Uncharacterized orf19.5809, orf19.5811 (MET1)				INVERSION	Hirakawa et al., 2015
P75010	INTRA	86	ORF		2	2	532066	536187	2	589663	585677	4122	3987	49490	Inverted	96.19	Uncharacterized orf19.1589, Uncharacterized orf19.5842	Uncharacterized orf19.5809, orf19.5811 (MET1)				INVERSION	Hirakawa et al., 2015
P57055	INTRA	86	ORF		2	2	532066	536187	2	589663	585677	4122	3987	49490	Inverted	96.19	Uncharacterized orf19.1589, Uncharacterized orf19.5842	Uncharacterized orf19.5809, orf19.5811 (MET1)				INVERSION	Hirakawa et al., 2015
P76067	INTRA	86	ORF		2	2	532066	536187	2	589663	585677	4122	3987	49490	Inverted	96.19	Uncharacterized orf19.1589, Uncharacterized orf19.5842	Uncharacterized orf19.5809, orf19.5811 (MET1)				INVERSION	Hirakawa et al., 2015
P75010	INTRA	124	ORF		2	3	621732	624946	3	639446	636234	3215	3213	11288	Inverted	99.53	Uncahracterized orf19.279, Uncharacterized orf19.280, Uncharacterized orf19.281, Uncharacterized orf19.284	orf19.297 (DTD2), Uncharacterized orf19.296, Uncharacterized orf19.295, Uncharacterized orf19.292				INVERSION	Hirakawa et al., 2015
P37039	INTRA	124	ORF		2	3	621732	624946	3	639446	636234	3215	3213	11288	Inverted	99.53	Uncahracterized orf19.279, Uncharacterized orf19.280, Uncharacterized orf19.281, Uncharacterized orf19.284	orf19.297 (DTD2), Uncharacterized orf19.296, Uncharacterized orf19.295, Uncharacterized orf19.292				INVERSION	Hirakawa et al., 2015
P57055	INTRA	127	ORF		2	3	665300	669412	3	767893	763780	4113	4114	94368	Inverted	99.13	Uncharacterized orf19.310, orf19.313 (DAL4)	orf19.6958 (ECM18), Uncharacterized orf19.6957, orf19.360 (FUR4)				INVERSION	Hirakawa et al., 2015
P60002	INTRA	127	ORF		2	3	665300	669412	3	767893	763780	4113	4114	94368	Inverted	99.13	Uncharacterized orf19.310, orf19.313 (DAL4)	orf19.6958 (ECM18), Uncharacterized orf19.6957, orf19.360 (FUR4)				INVERSION	Hirakawa et al., 2015
SC5314	INTRA	127	ORF		2	3	665300	669412	3	767893	763780	4113	4114	94368	Inverted	99.13	Uncharacterized orf19.310, orf19.313 (DAL4)	orf19.6958 (ECM18), Uncharacterized orf19.6957, orf19.360 (FUR4)				INVERSION	Hirakawa et al., 2015
P37039	INTRA	144	ORF		2	4	83962	85706	4	119257	117512	1745	1746	31806	Inverted	98.34	Uncharacterized orf19.5678	Uncharacterized orf19.4173, Part of Uncharacterized orf19.4174				INVERSION	This Study & Hirakawa et al., 2015
SC5314	INTRA	144	ORF		2	4	83962	85706	4	119257	117512	1745	1746	31806	Inverted	98.34	Uncharacterized orf19.5678	Uncharacterized orf19.4173, Part of Uncharacterized orf19.4174				INVERSION	This Study & Hirakawa et al., 2015
P75063	INTRA	144	ORF		2	4	83962	85706	4	119257	117512	1745	1746	31806	Inverted	98.34	Uncharacterized orf19.5678	Uncharacterized orf19.4173, Part of Uncharacterized orf19.4174		LOH		INVERSION	This Study & Hirakawa et al., 2015
P78048	INTRA	144	ORF		2	4	83962	85706	4	119257	117512	1745	1746	31806	Inverted	98.34	Uncharacterized orf19.5678	Uncharacterized orf19.4173, Part of Uncharacterized orf19.4174				INVERSION	This Study & Hirakawa et al., 2015
P37039	INTRA	151	Intergenic		2	4	991719	992242	4	995876	995353	524	524	3111	Inverted	99.81	Intergenic Region	Part of CEN4				INVERSION	This Study & Hirakawa et al., 2015
SC5314	INTRA	151	Intergenic		2	4	991719	992242	4	995876	995353	524	524	3111	Inverted	99.81	Intergenic Region	Part of CEN4				INVERSION	This Study & Hirakawa et al., 2015
P78042	INTRA	151	Intergenic		2	4	991719	992242	4	995876	995353	524	524	3111	Inverted	99.81	Intergenic Region	Part of CEN4				INVERSION	This Study & Hirakawa et al., 2015
AMS3743	INTRA	151	Intergenic		2	4	991719	992242	4	995876	995353	524	524	3111	Inverted	99.81	Intergenic Region	Part of CEN4		LOH	CNV	INVERSION	This Study & Hirakawa et al., 2015
12C	INTRA	153	ORF		2	4	1296034	1296785	4	1260018	1259267	752	752	37518	Inverted	99.34	Part of Uncharacterized orf19.1273, Uncharacterized orf19.1274	Part of orf19.1255 (ZCF5)				INVERSION	Hirakawa et al., 2015
P37039	INTRA	179	ORF		3	6	560383	564162	6	634209	630427	3780	3783	66265	Inverted	96.35	Uncharacterized orf19.5543	orf19.5584 (PEP3)				INVERSION	Hirakawa et al., 2015
P78048	INTRA	179	ORF		3	6	560383	564162	6	634209	630427	3780	3783	66265	Inverted	96.35	Uncharacterized orf19.5543	orf19.5584 (PEP3)				INVERSION	Hirakawa et al., 2015
P76067	INTRA	179	ORF		3	6	560383	564162	6	634209	630427	3780	3783	66265	Inverted	96.35	Uncharacterized orf19.5543	orf19.5584 (PEP3)				INVERSION	Hirakawa et al., 2015
P78048	INTRA	179	ORF		3	6	560383	564162	6	634209	630427	3780	3783	66265	Inverted	96.35	Uncharacterized orf19.5543	orf19.5584 (PEP3)				INVERSION	Hirakawa et al., 2015
