# Supplementary material for: Genome plasticity in Candida albicans is driven by long repeat sequences
Source: eLife journal article supplement (doi:10.7554/elife.45954), 2019-06-07
Supplement: supp [file elife-45954-supp-v1.zip › elife_poa_e45954_Supplementary_File_7.xlsx]

## Sheet: Supplementary File 7
Primer Name (with Chr_Position)	Primer Number in Figures	Sequence (5' -> 3')	Description
1203_Chr4_995985_995966	1	ATCCCAAAGCCGATCTCCTC	PCR
1185_Chr4_991344_991363	2	AAATACATTCGCTCCTGCTG	PCR
491_Chr4_993745_993726	3	CGGATGTCTGCTTGCTCAGA	PCR / DIG Southern Probe
1186_Chr4_995135_995155	4	ATGGTTCTGATTGTTGCCTCG	PCR
1218_Chr4_83699_83719	5	AAGGAAGGGCAATATTGAGTG	PCR
1219_Chr4_86354_86330	6	ACTACTCTTTTCTTAGTTGACCCAG	PCR
1221_Chr4_119573_119551	7	ACATTGTTGGTATTGTCTGGTGG	PCR
490_Chr4_993104_993123	NA	TACATTCTGCAAGCCGCTCA	DIG Southern Probe
