# Supplementary figures and images for: Genome plasticity in Candida albicans is driven by long repeat sequences
Source: eLife journal article supplement (doi:10.7554/elife.45954), 2019-06-07

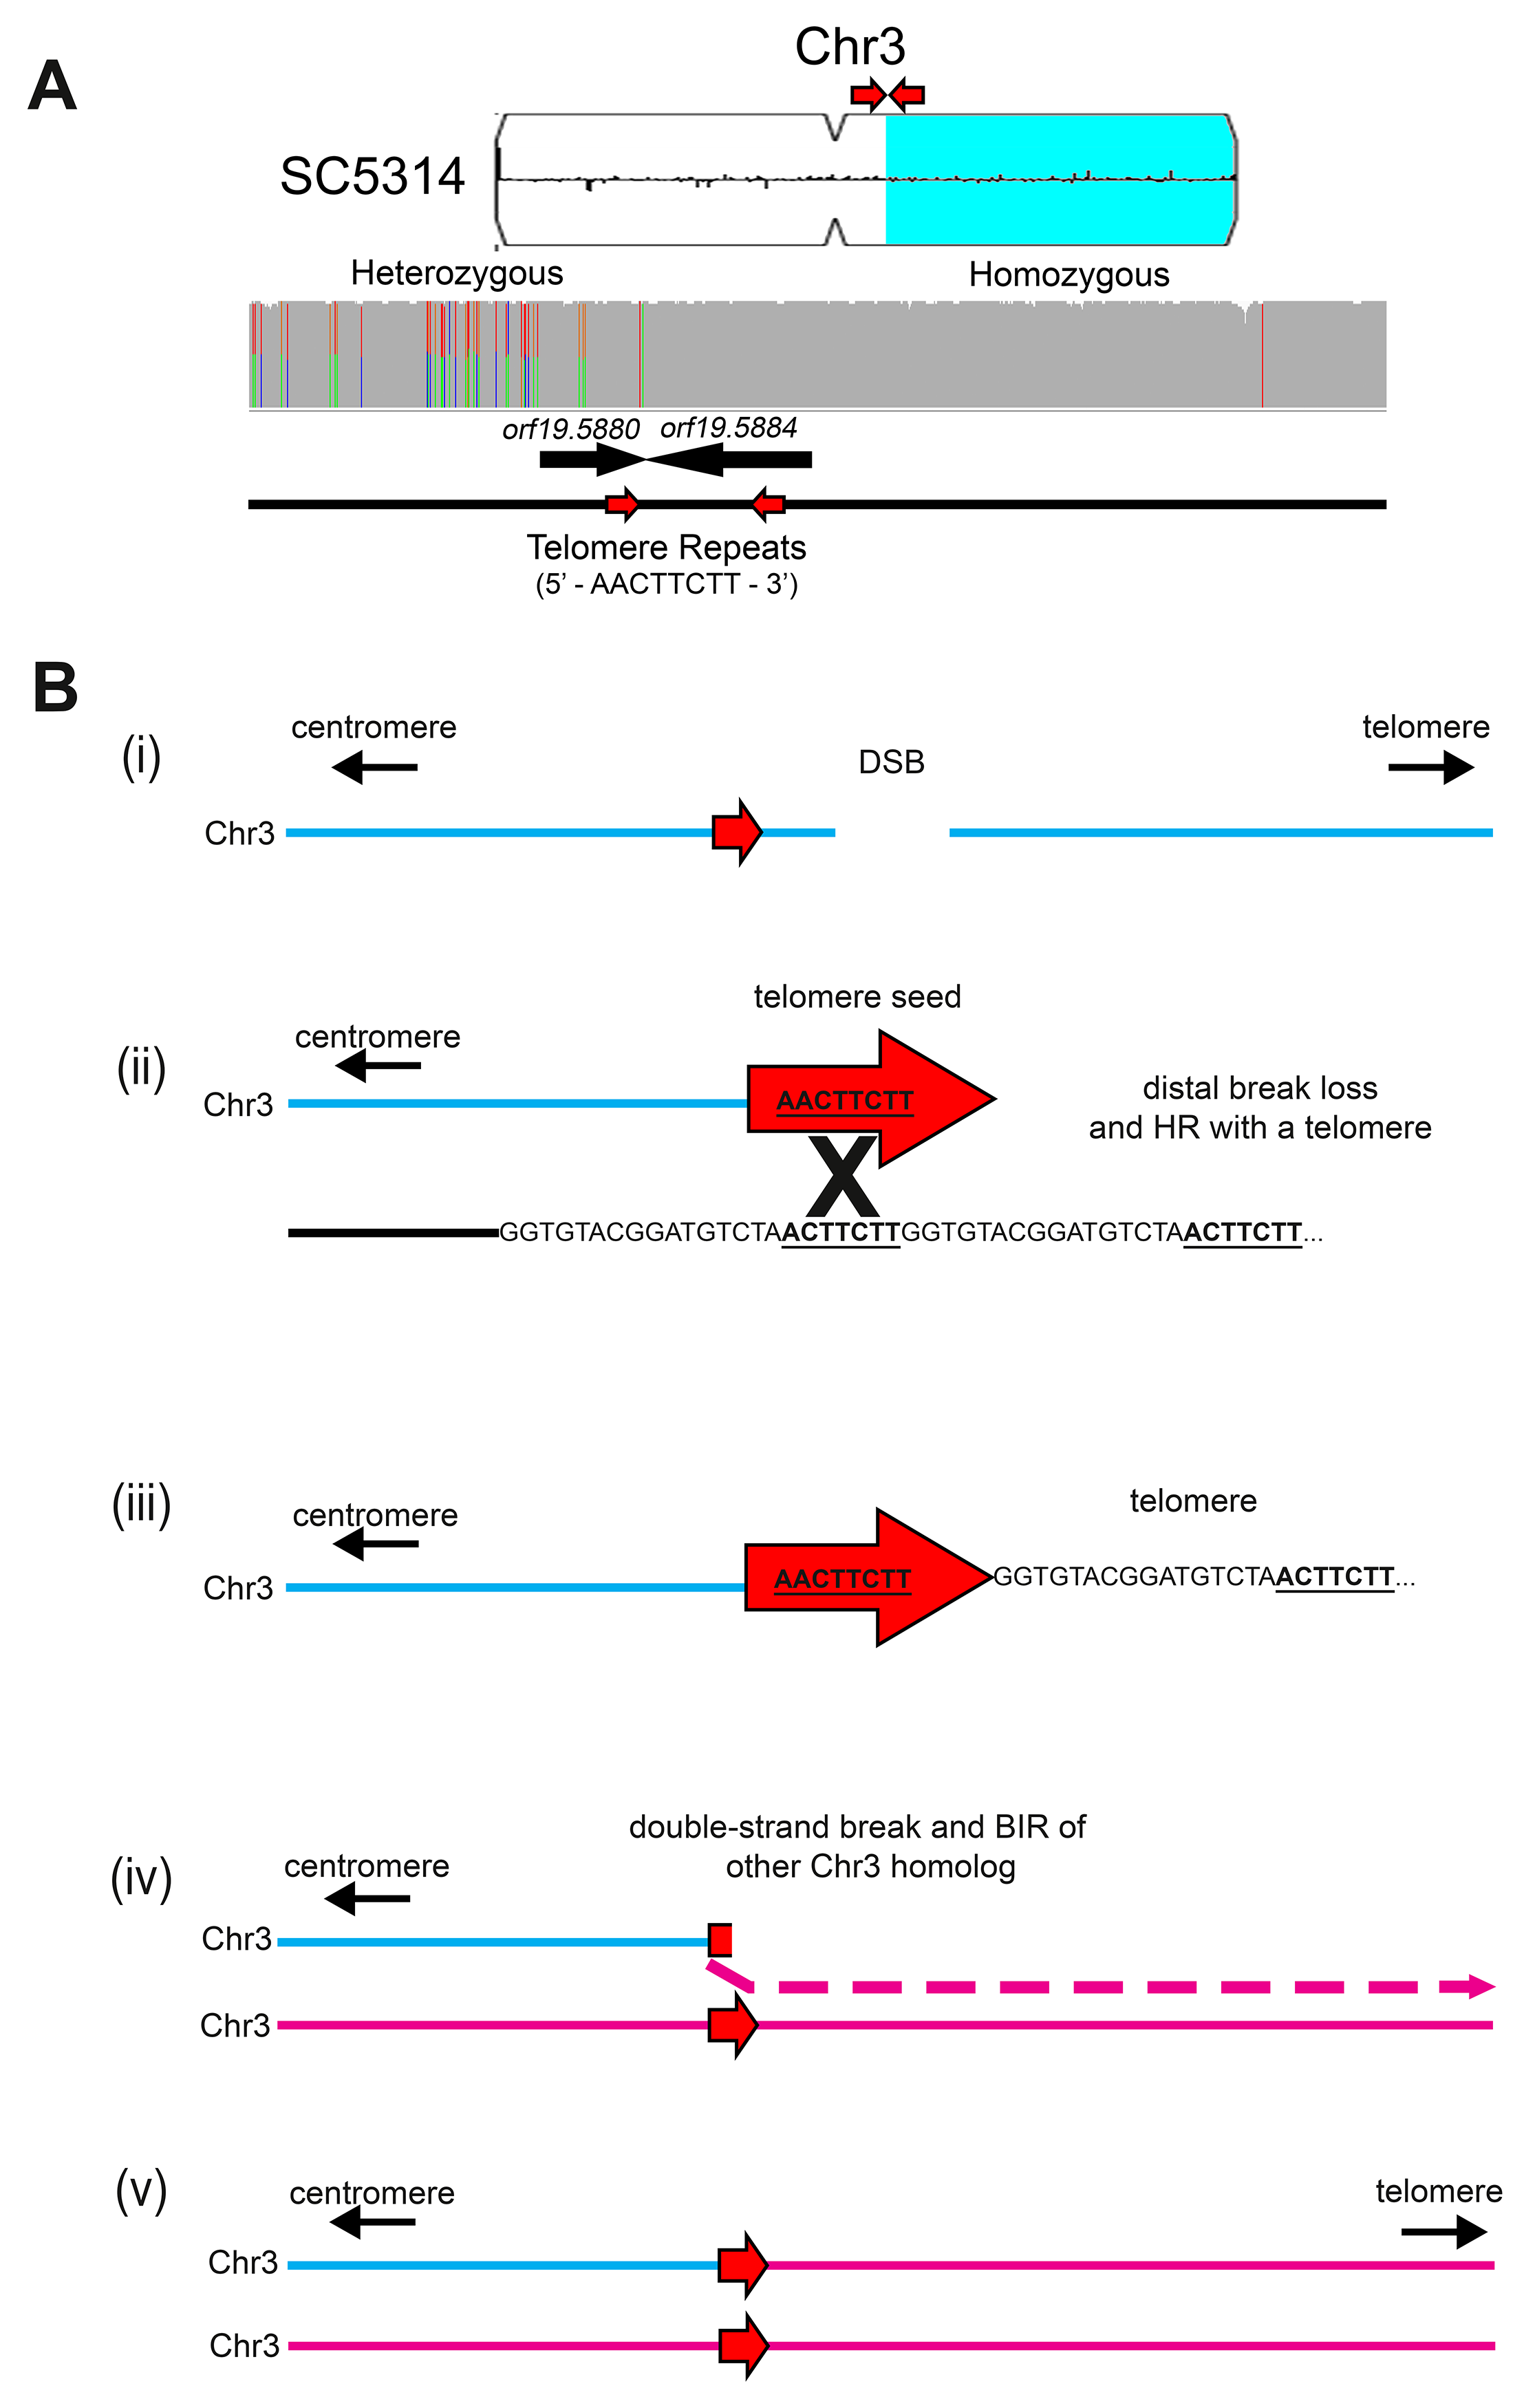

Supplement: supp [file elife-45954-supp-v1.zip › elife_poa_e45954_Figure_4_figure_supplement_1.tif]

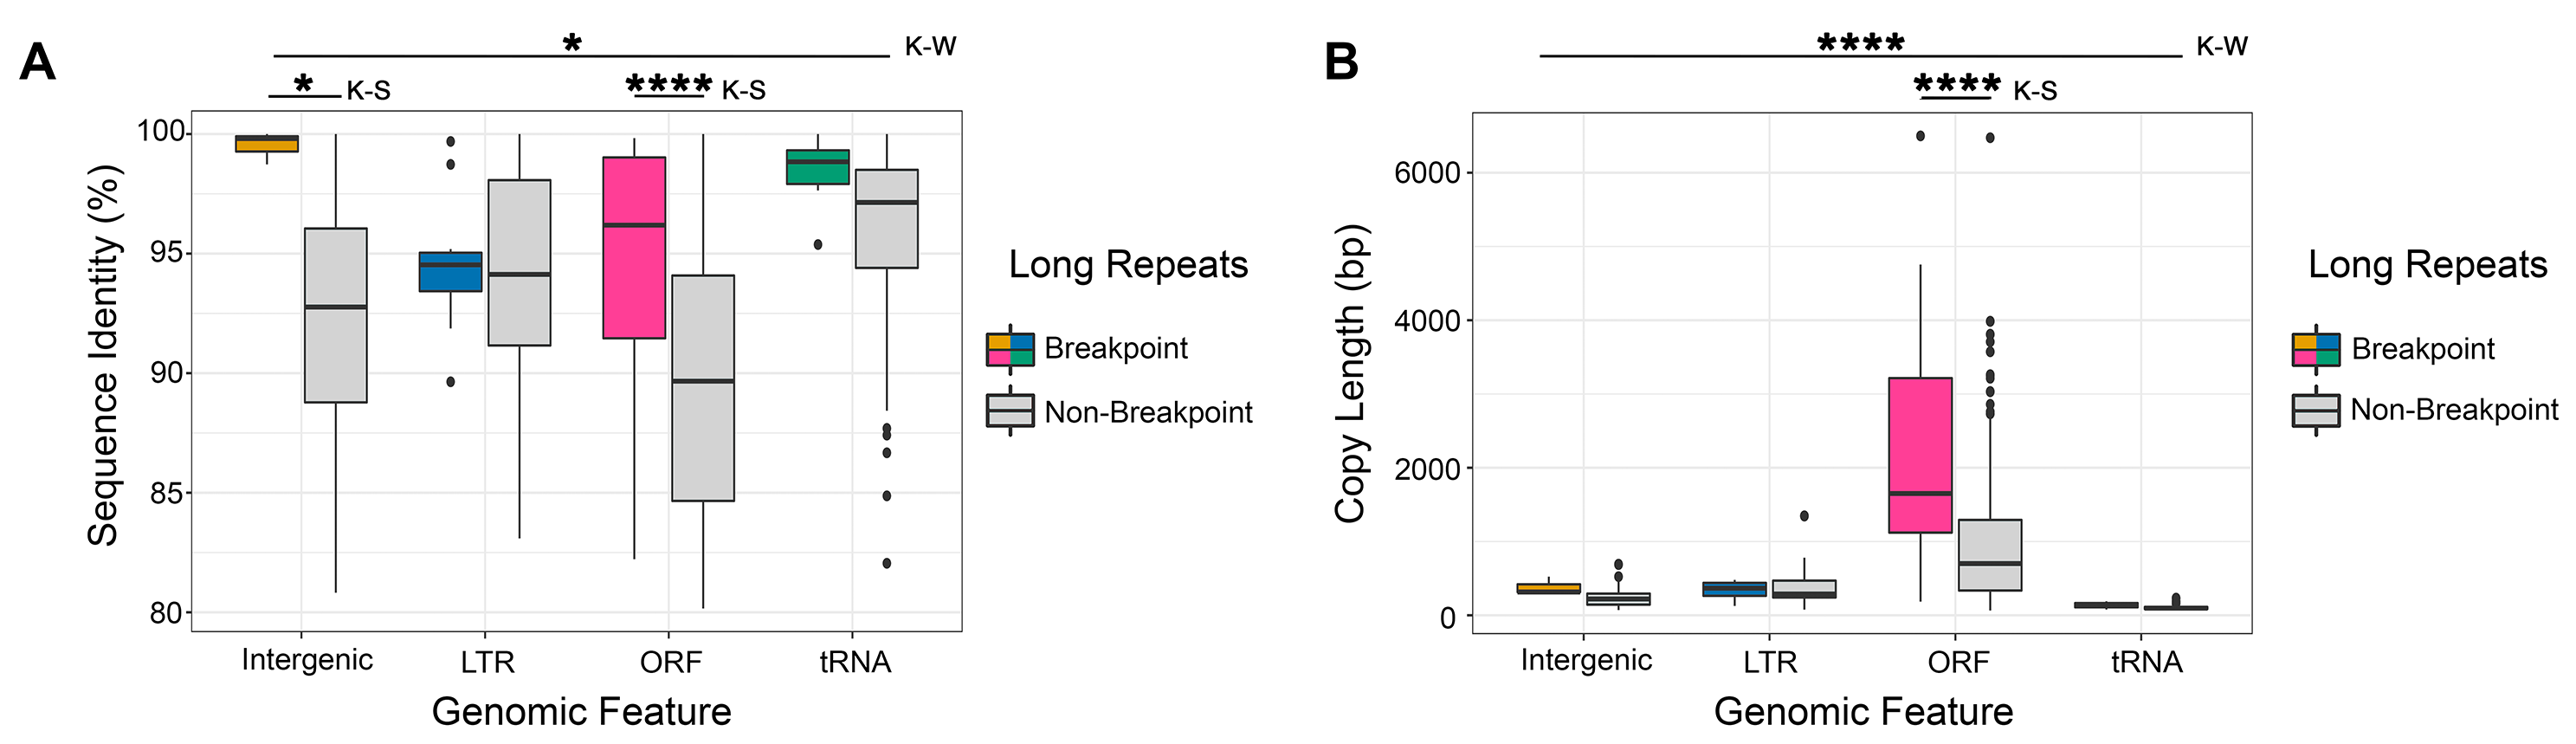

Supplement: supp [file elife-45954-supp-v1.zip › elife_poa_e45954_Figure_6_figure_supplement_1.tif]

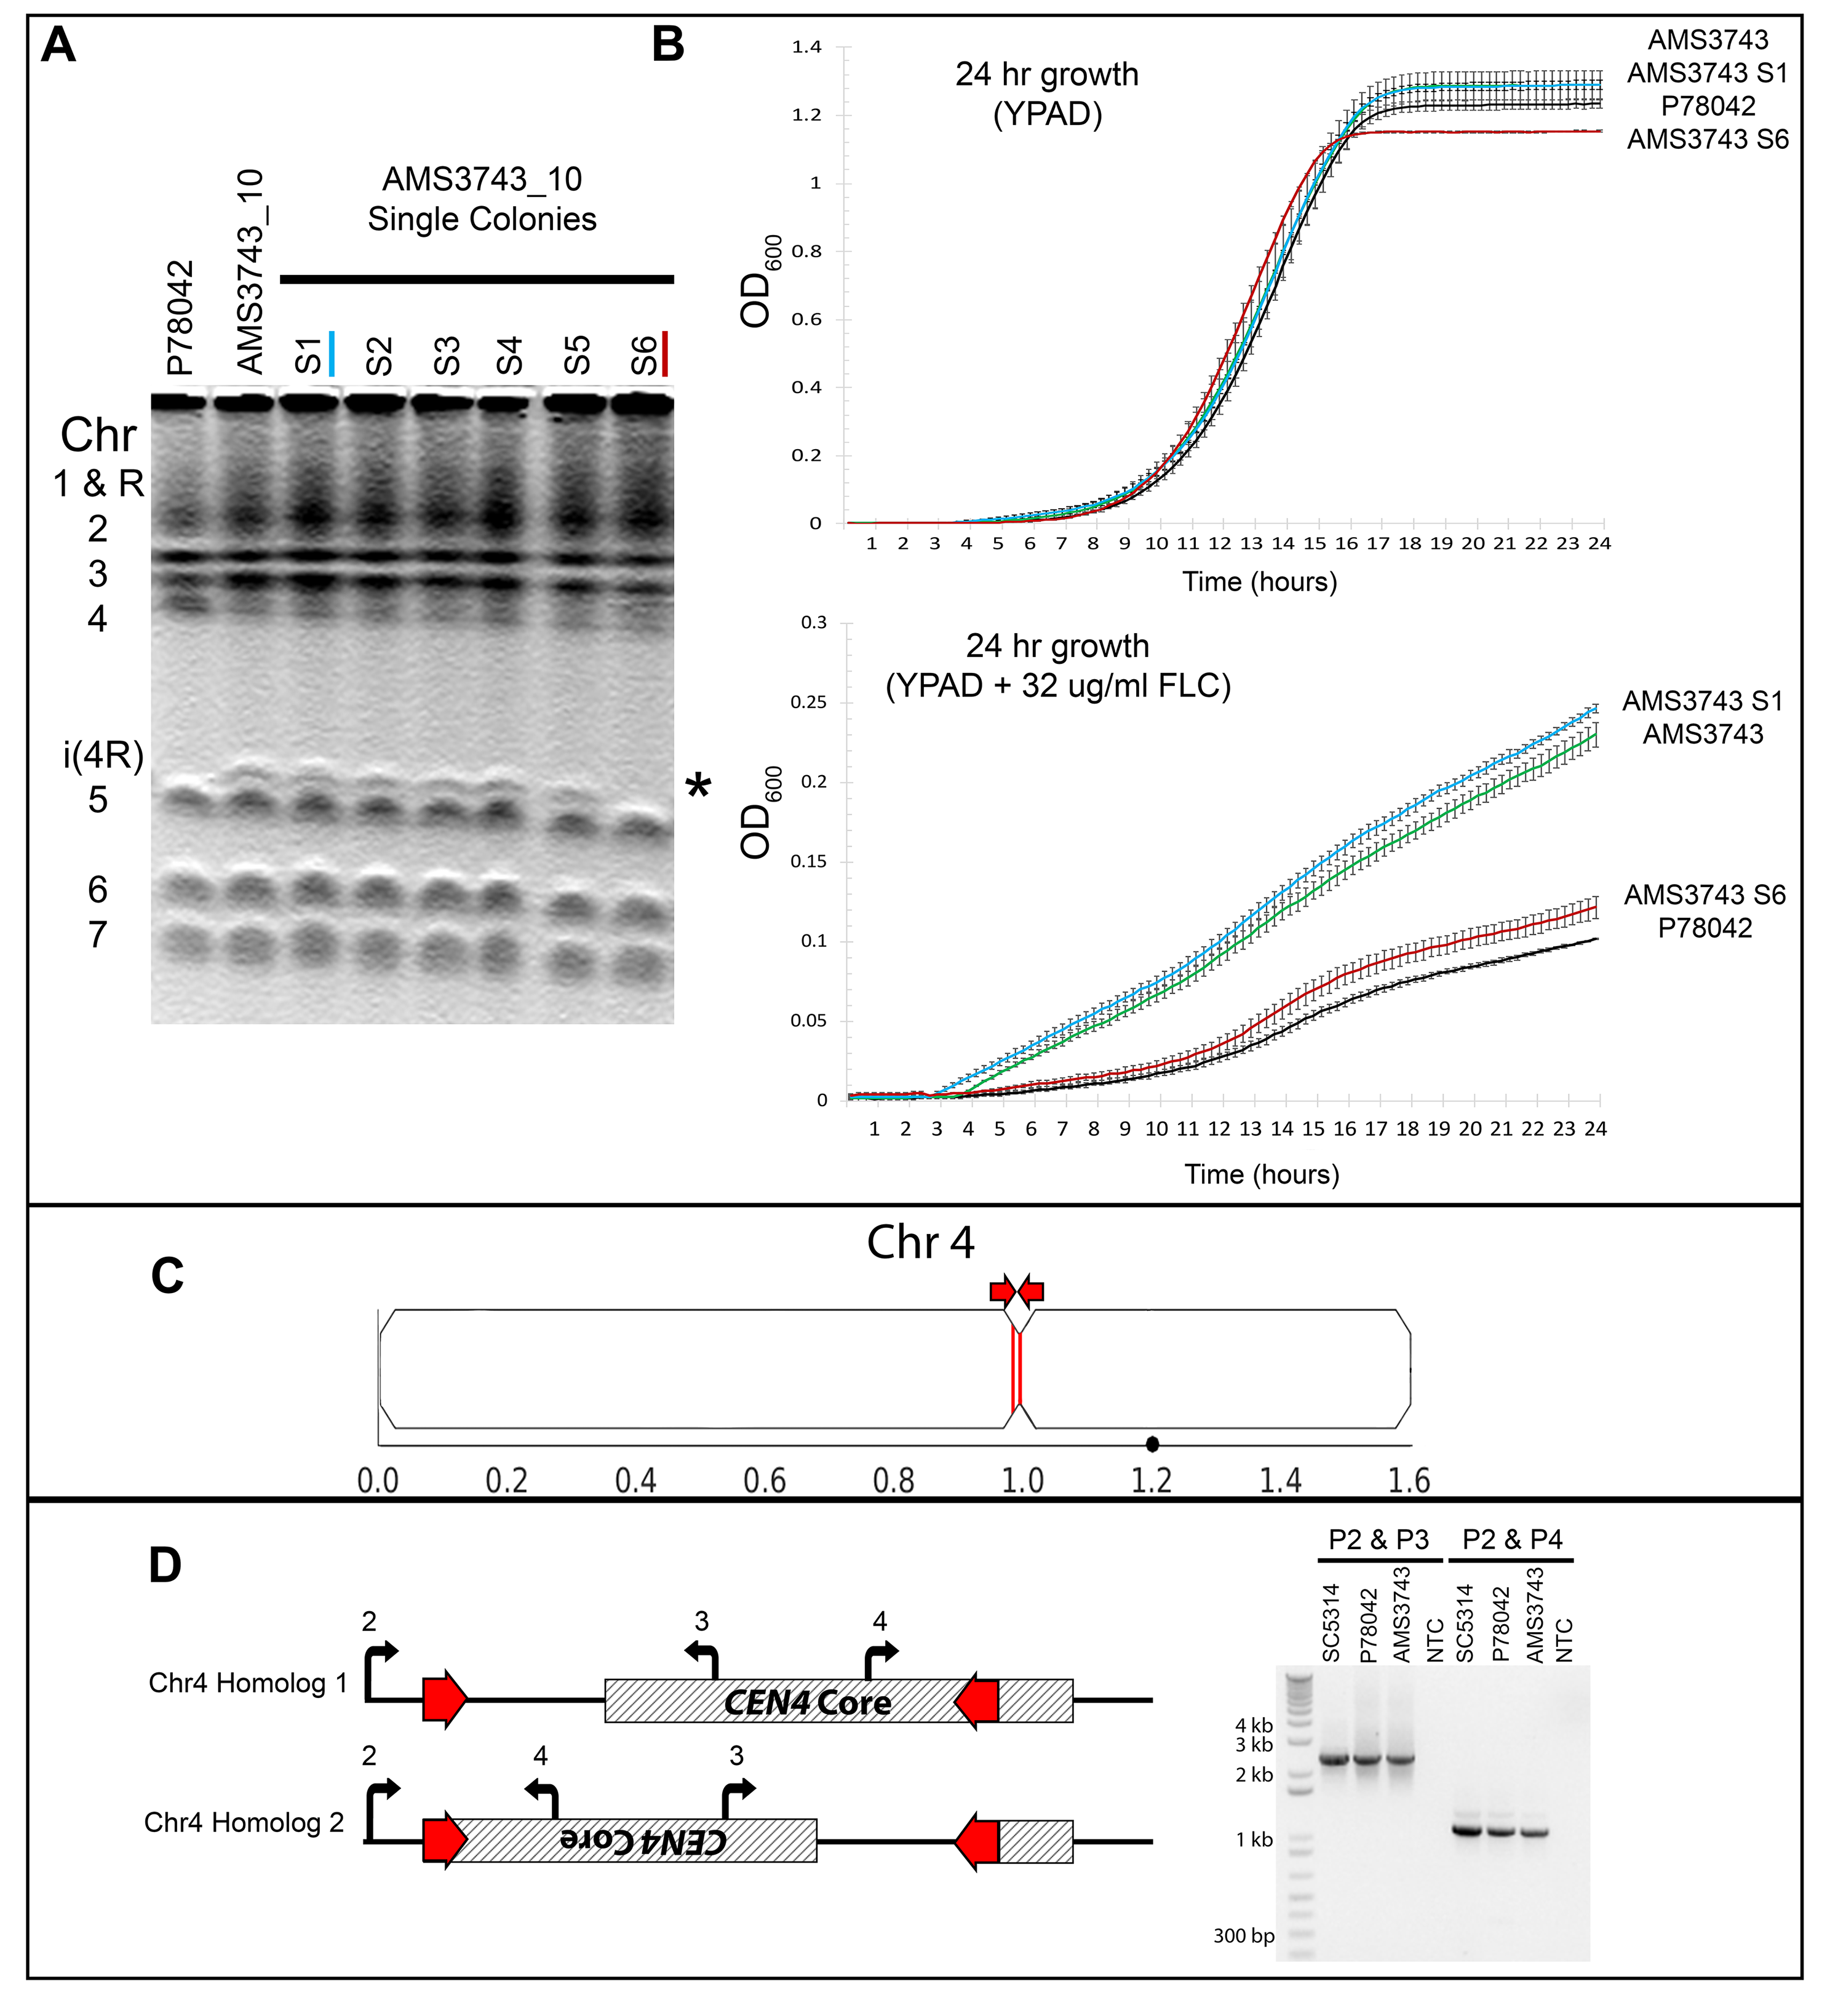

Supplement: supp [file elife-45954-supp-v1.zip › elife_poa_e45954_Figure_1_figure_supplement_1.tif]

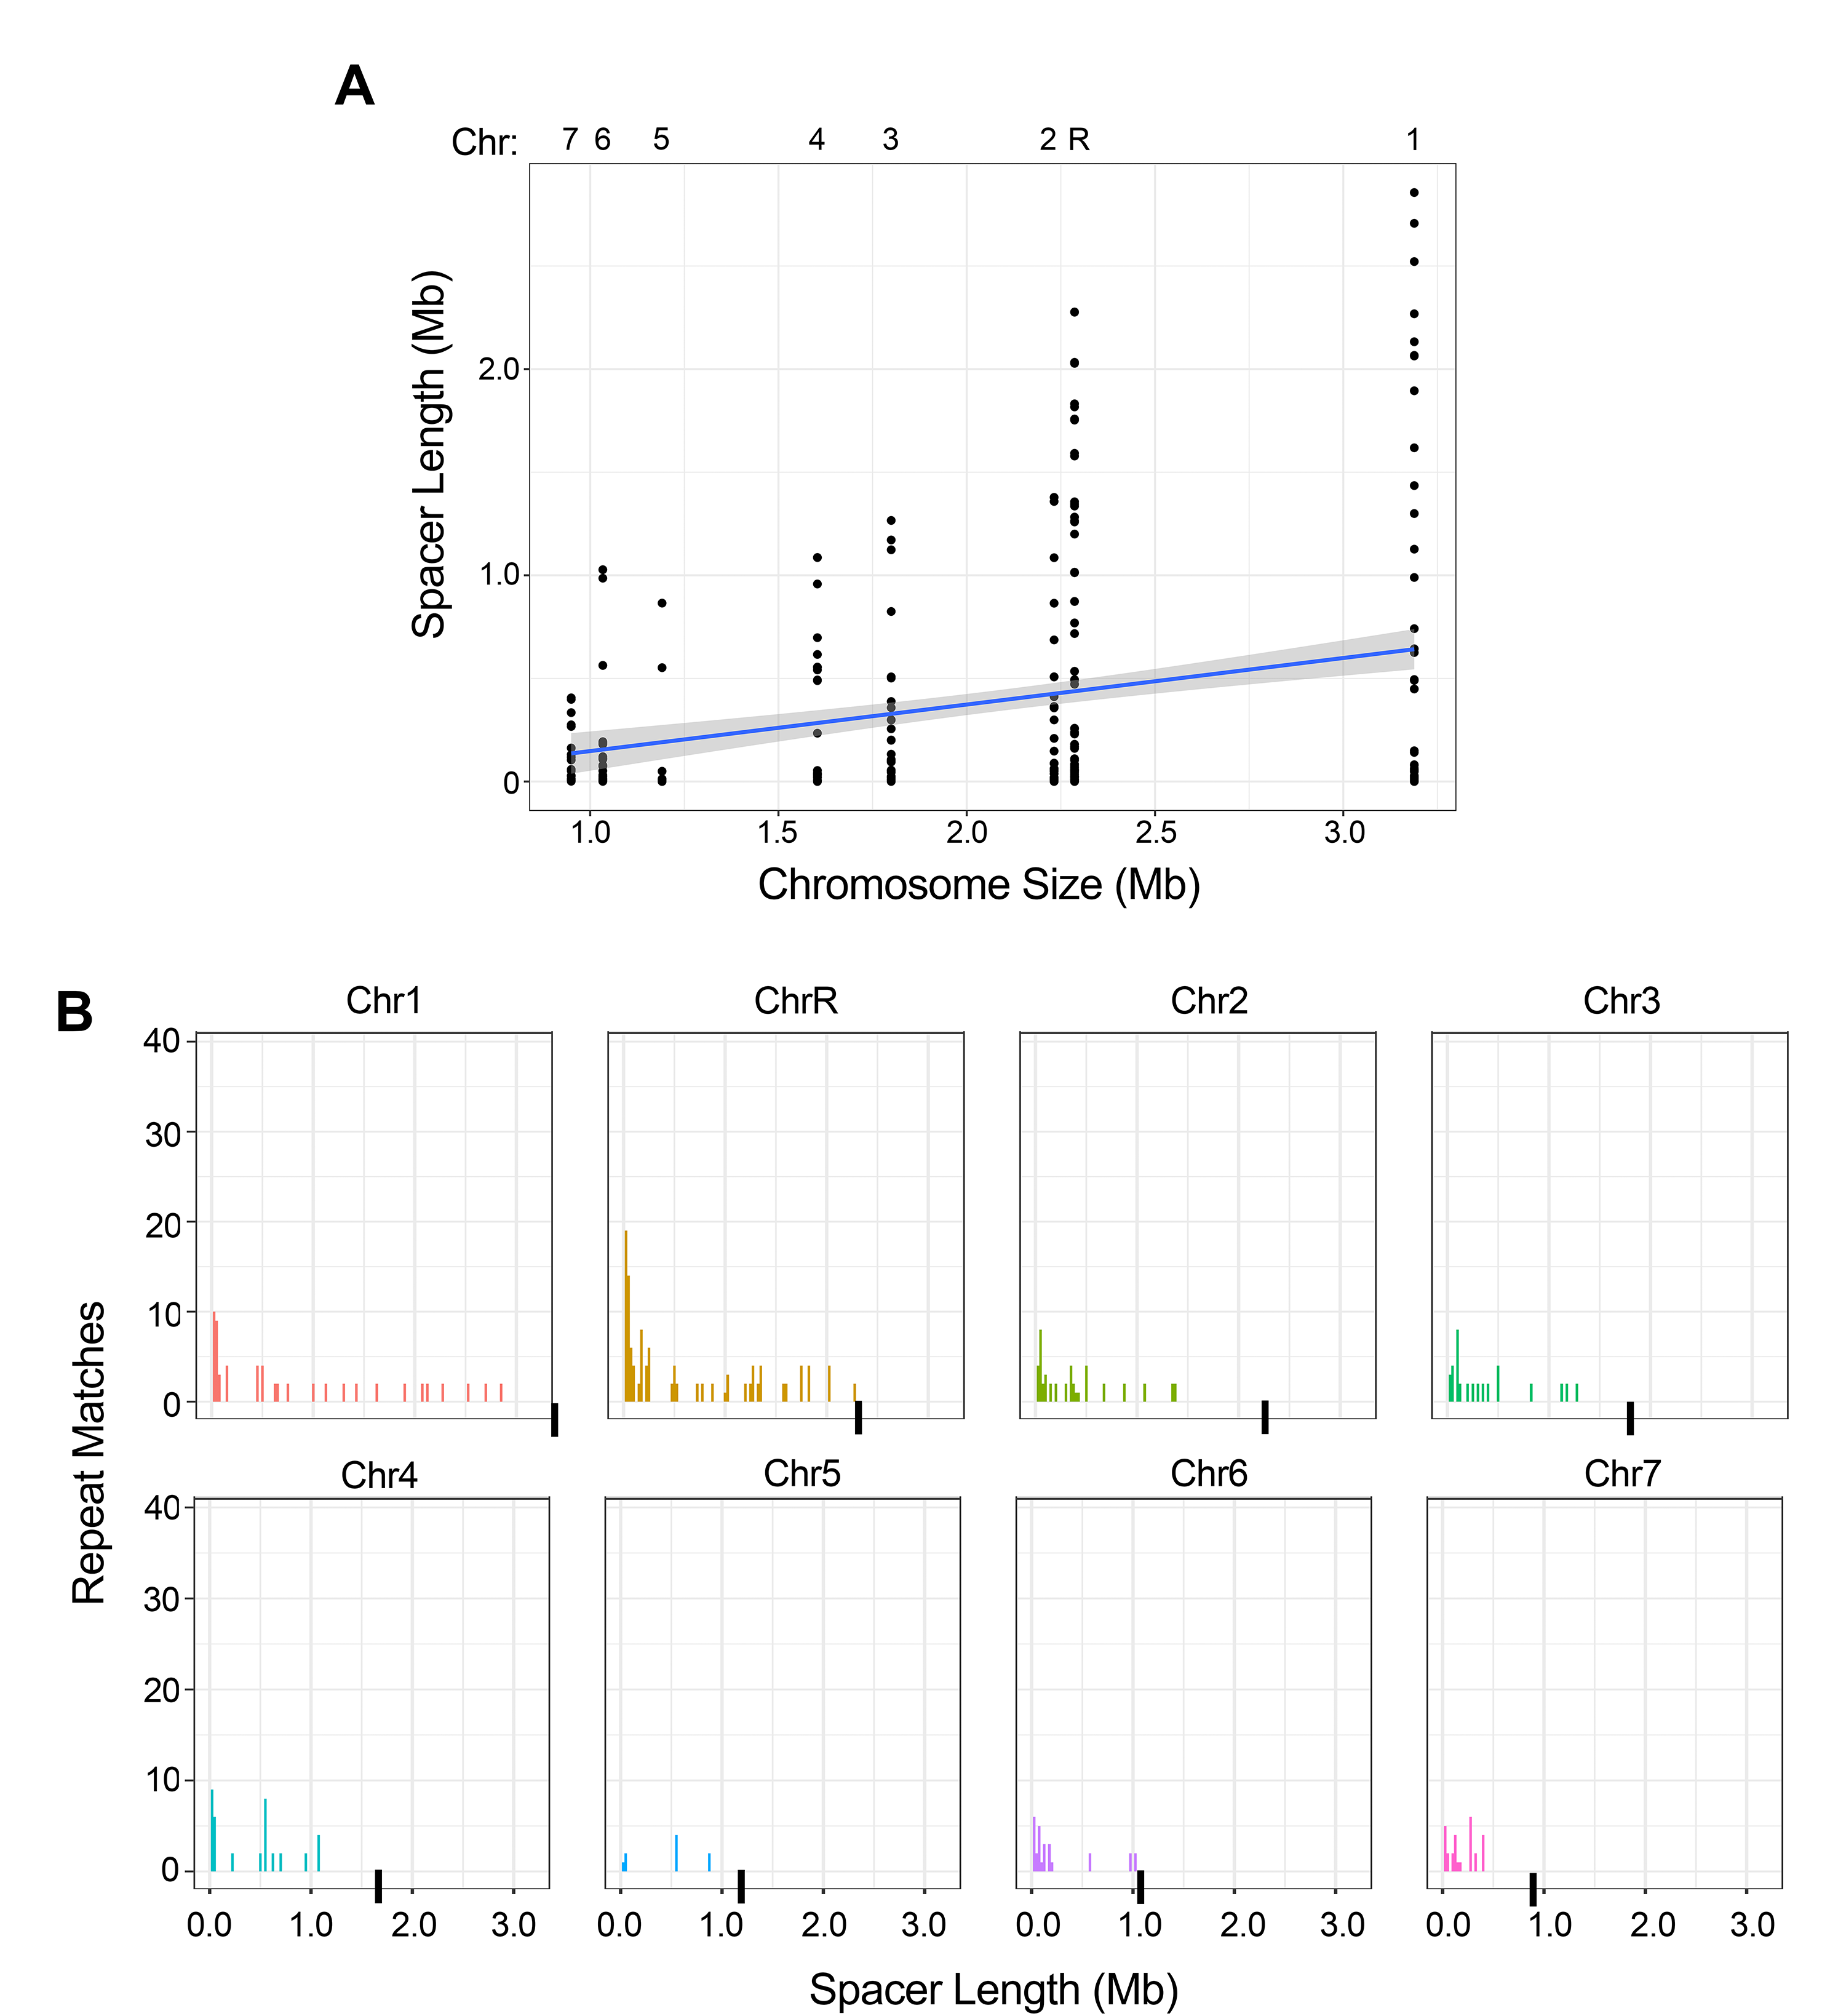

Supplement: supp [file elife-45954-supp-v1.zip › elife_poa_e45954_Figure_2_figure_supplement_2.tif]

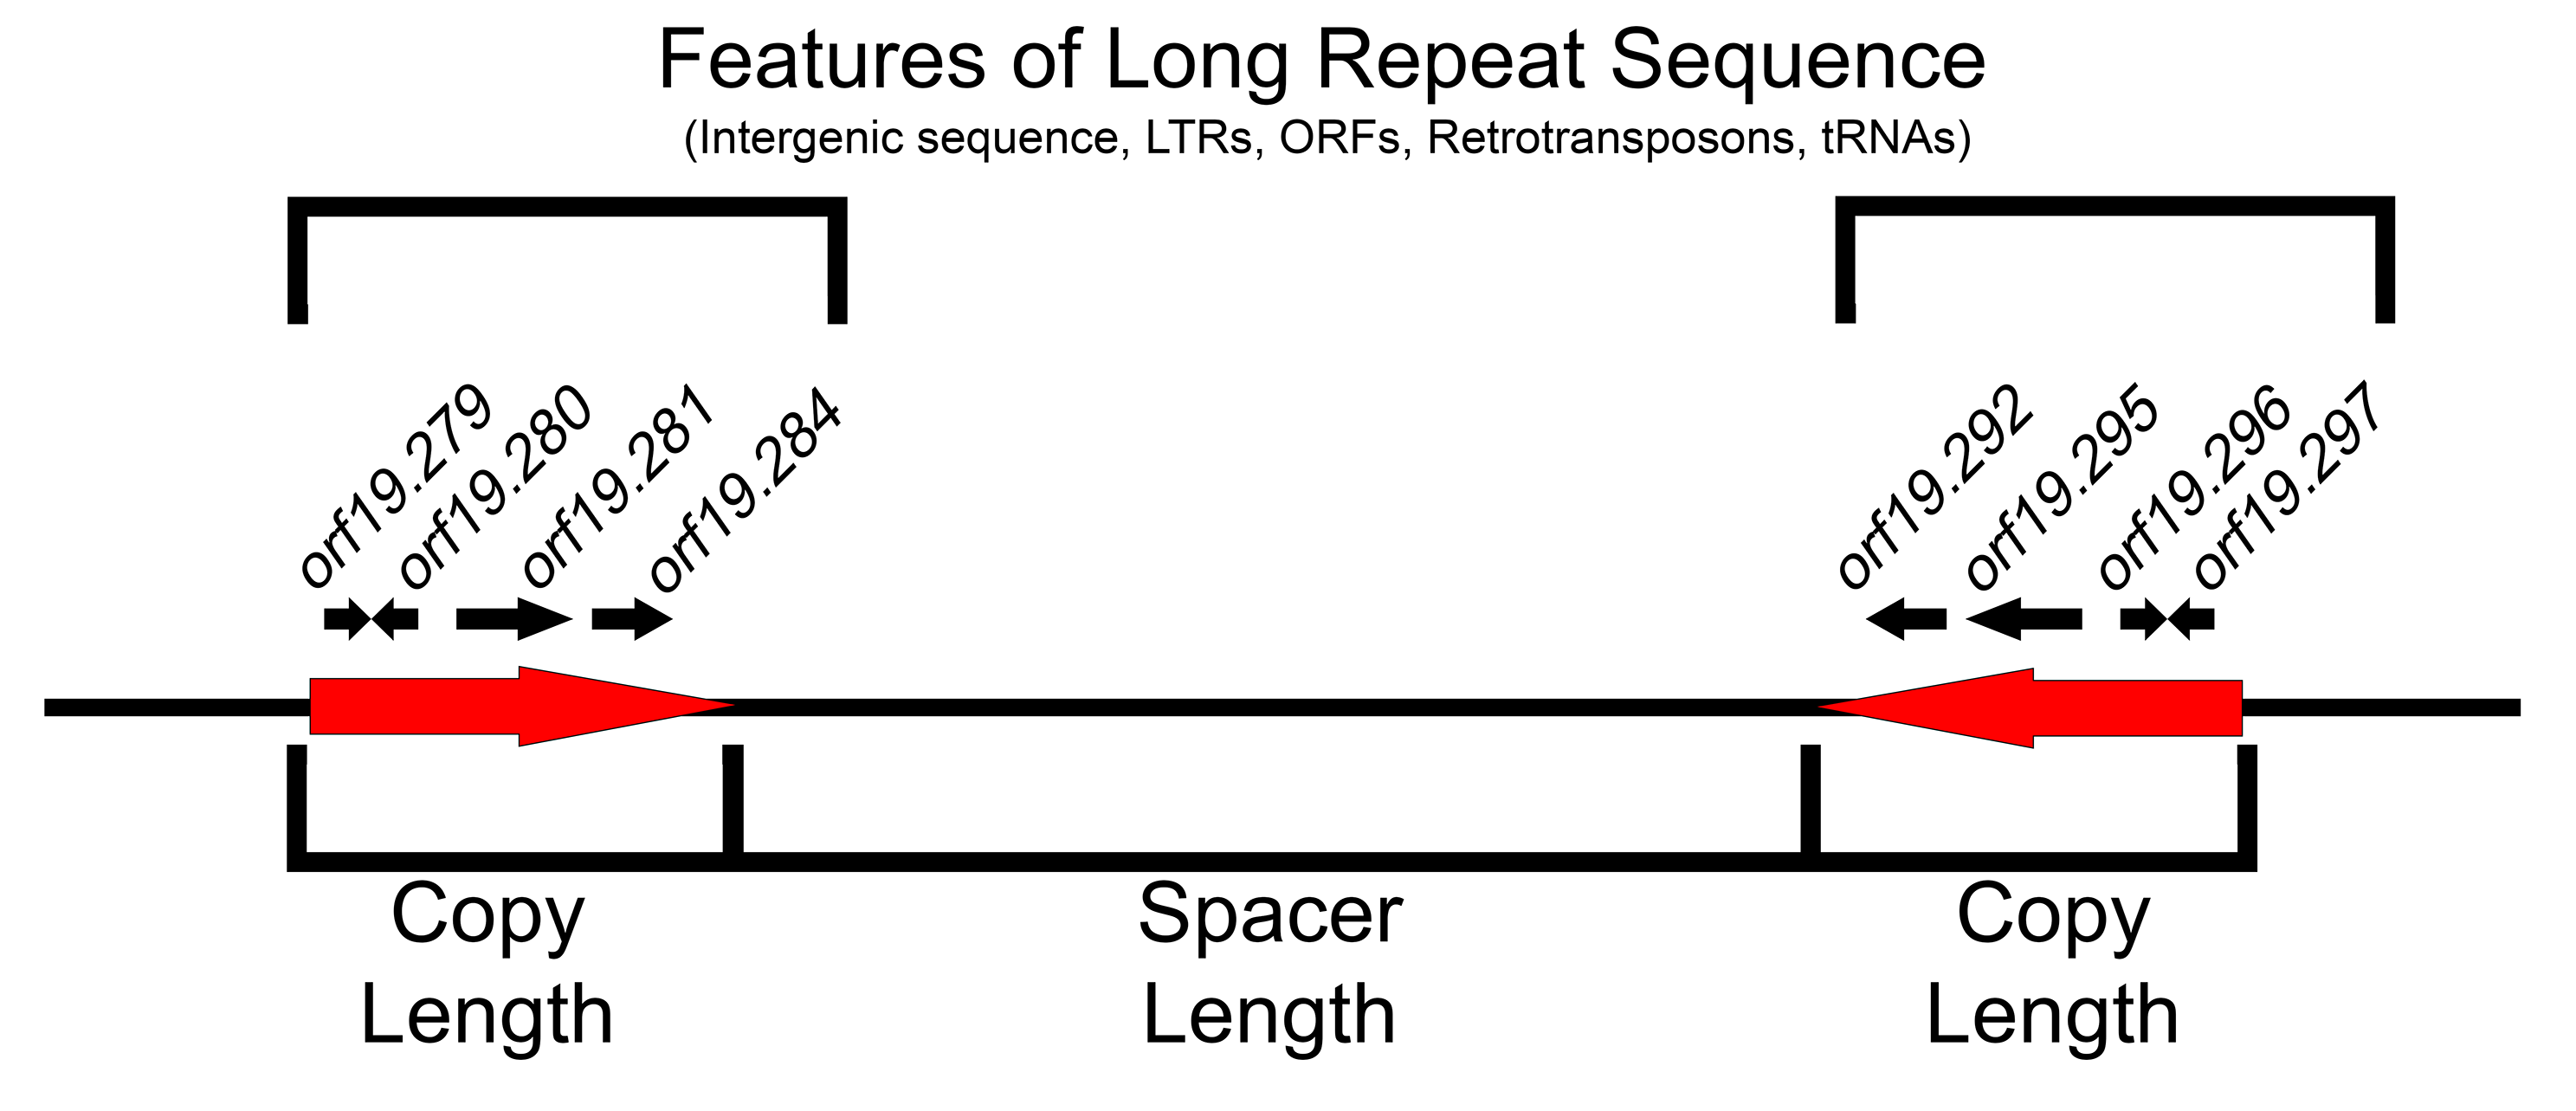

Supplement: supp [file elife-45954-supp-v1.zip › elife_poa_e45954_Figure_2_figure_supplement_1.tif]

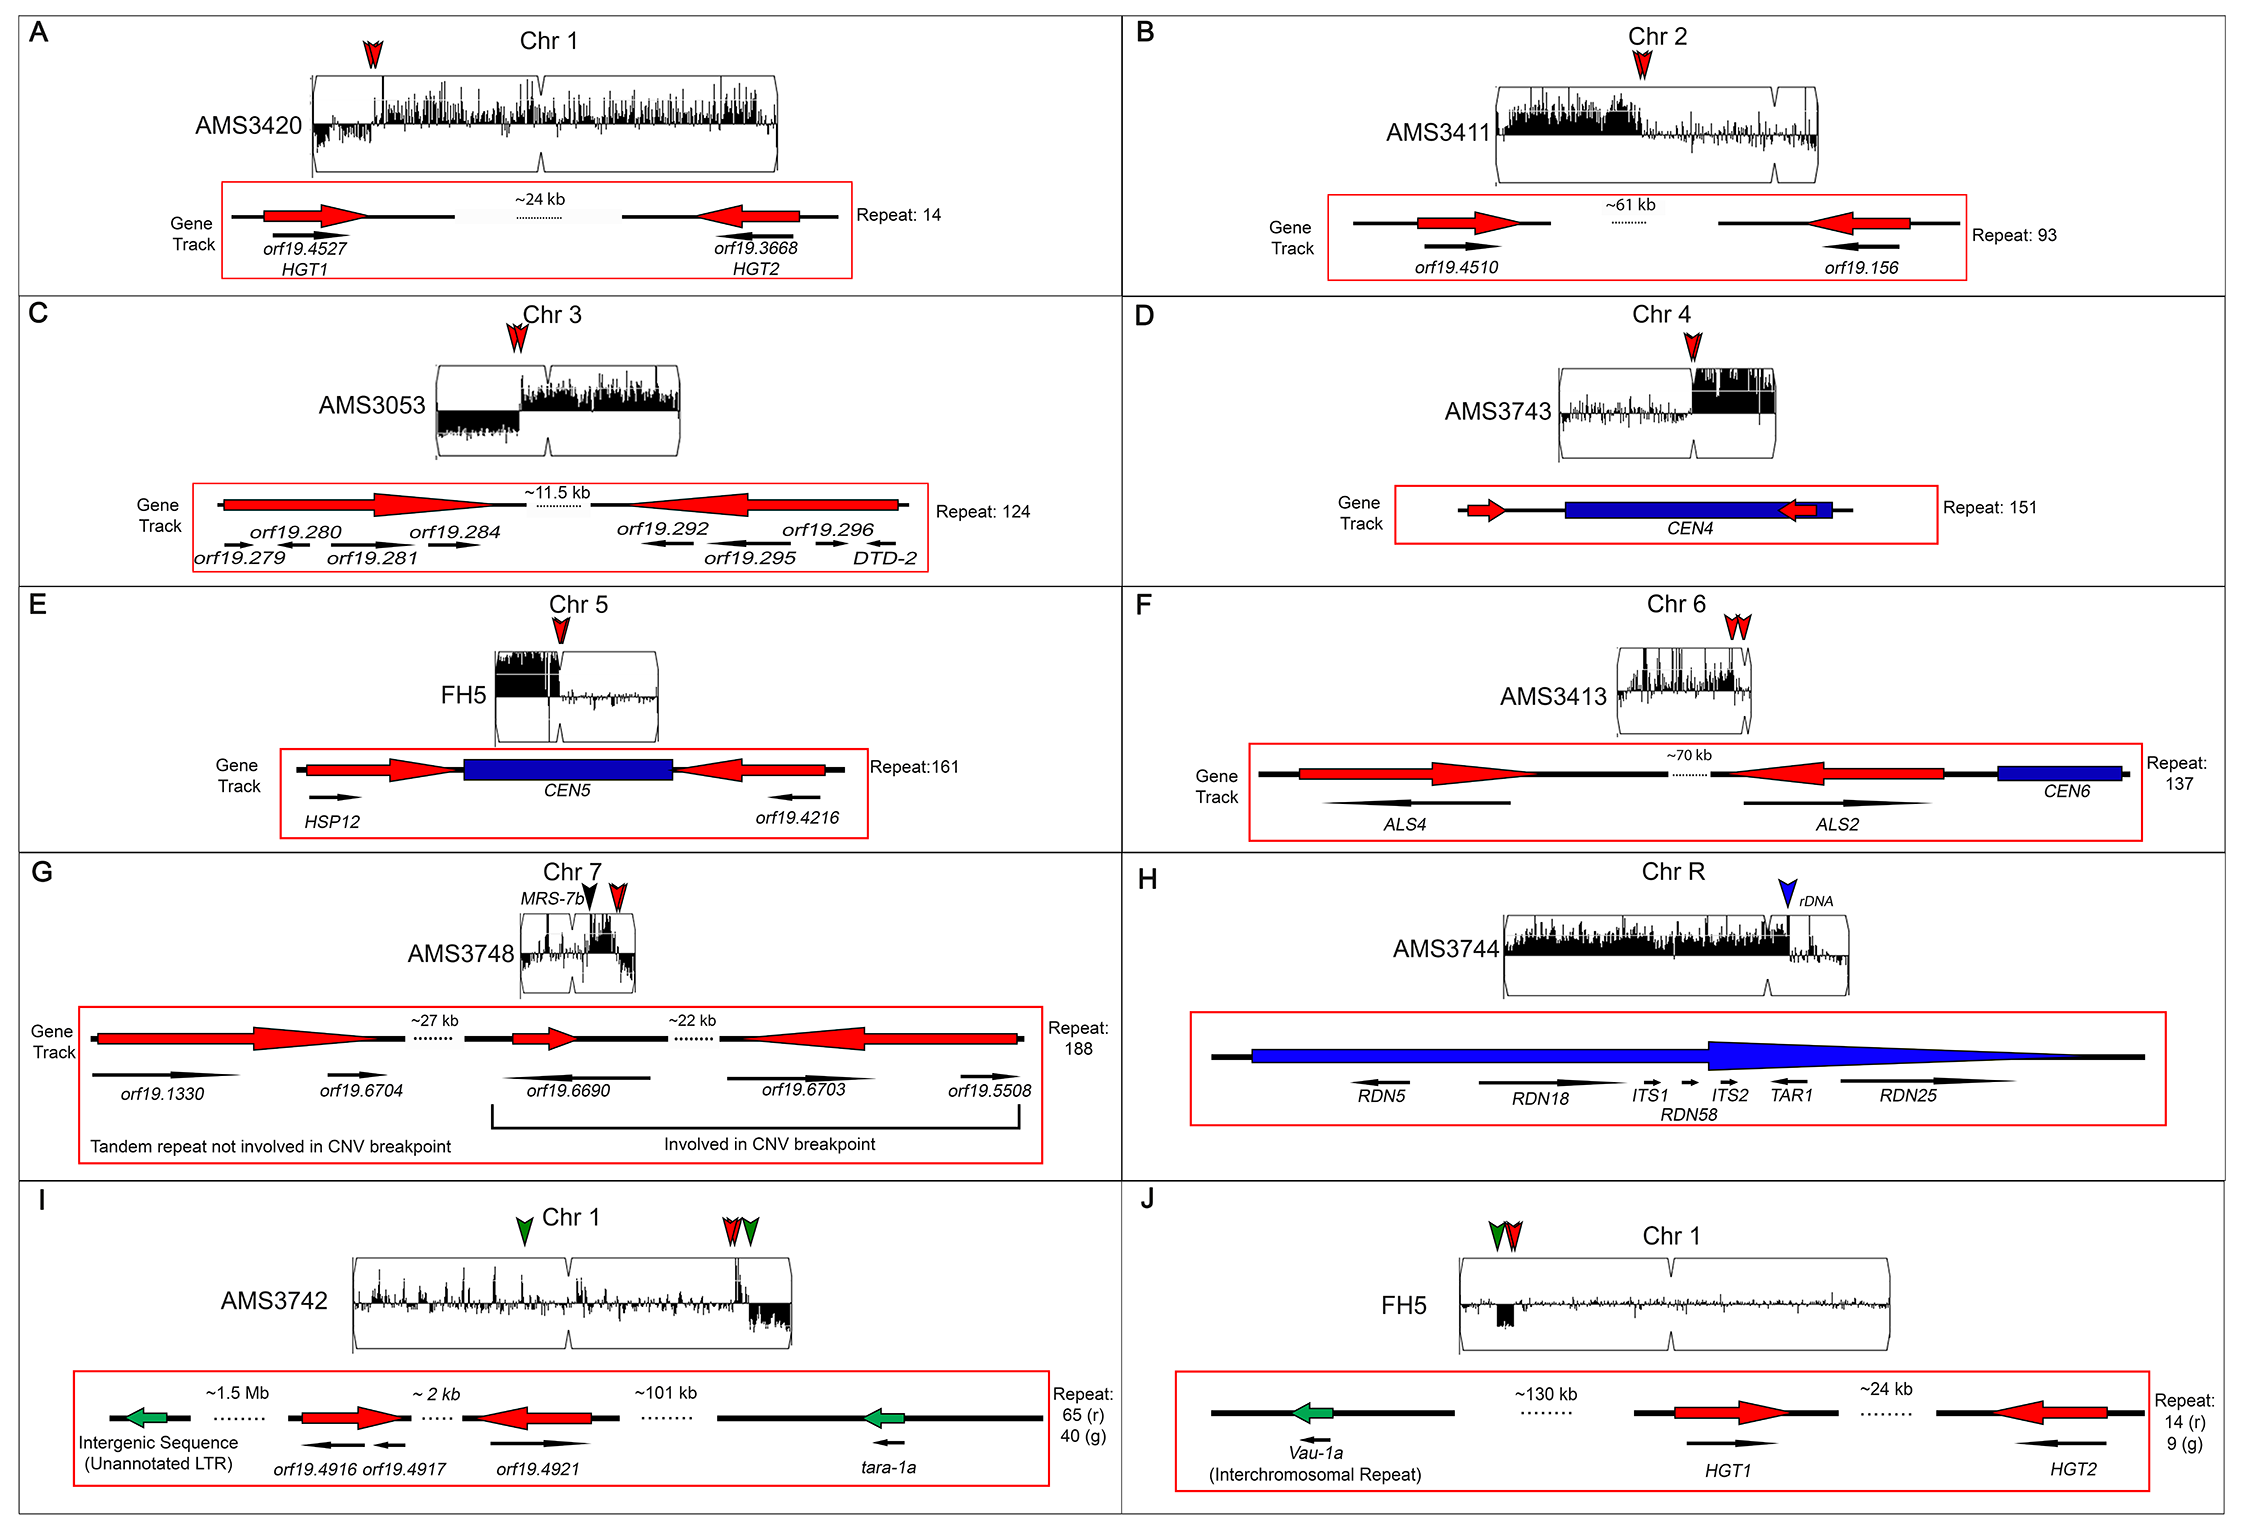

Supplement: supp [file elife-45954-supp-v1.zip › elife_poa_e45954_Figure_3_figure_supplement_1.tif]

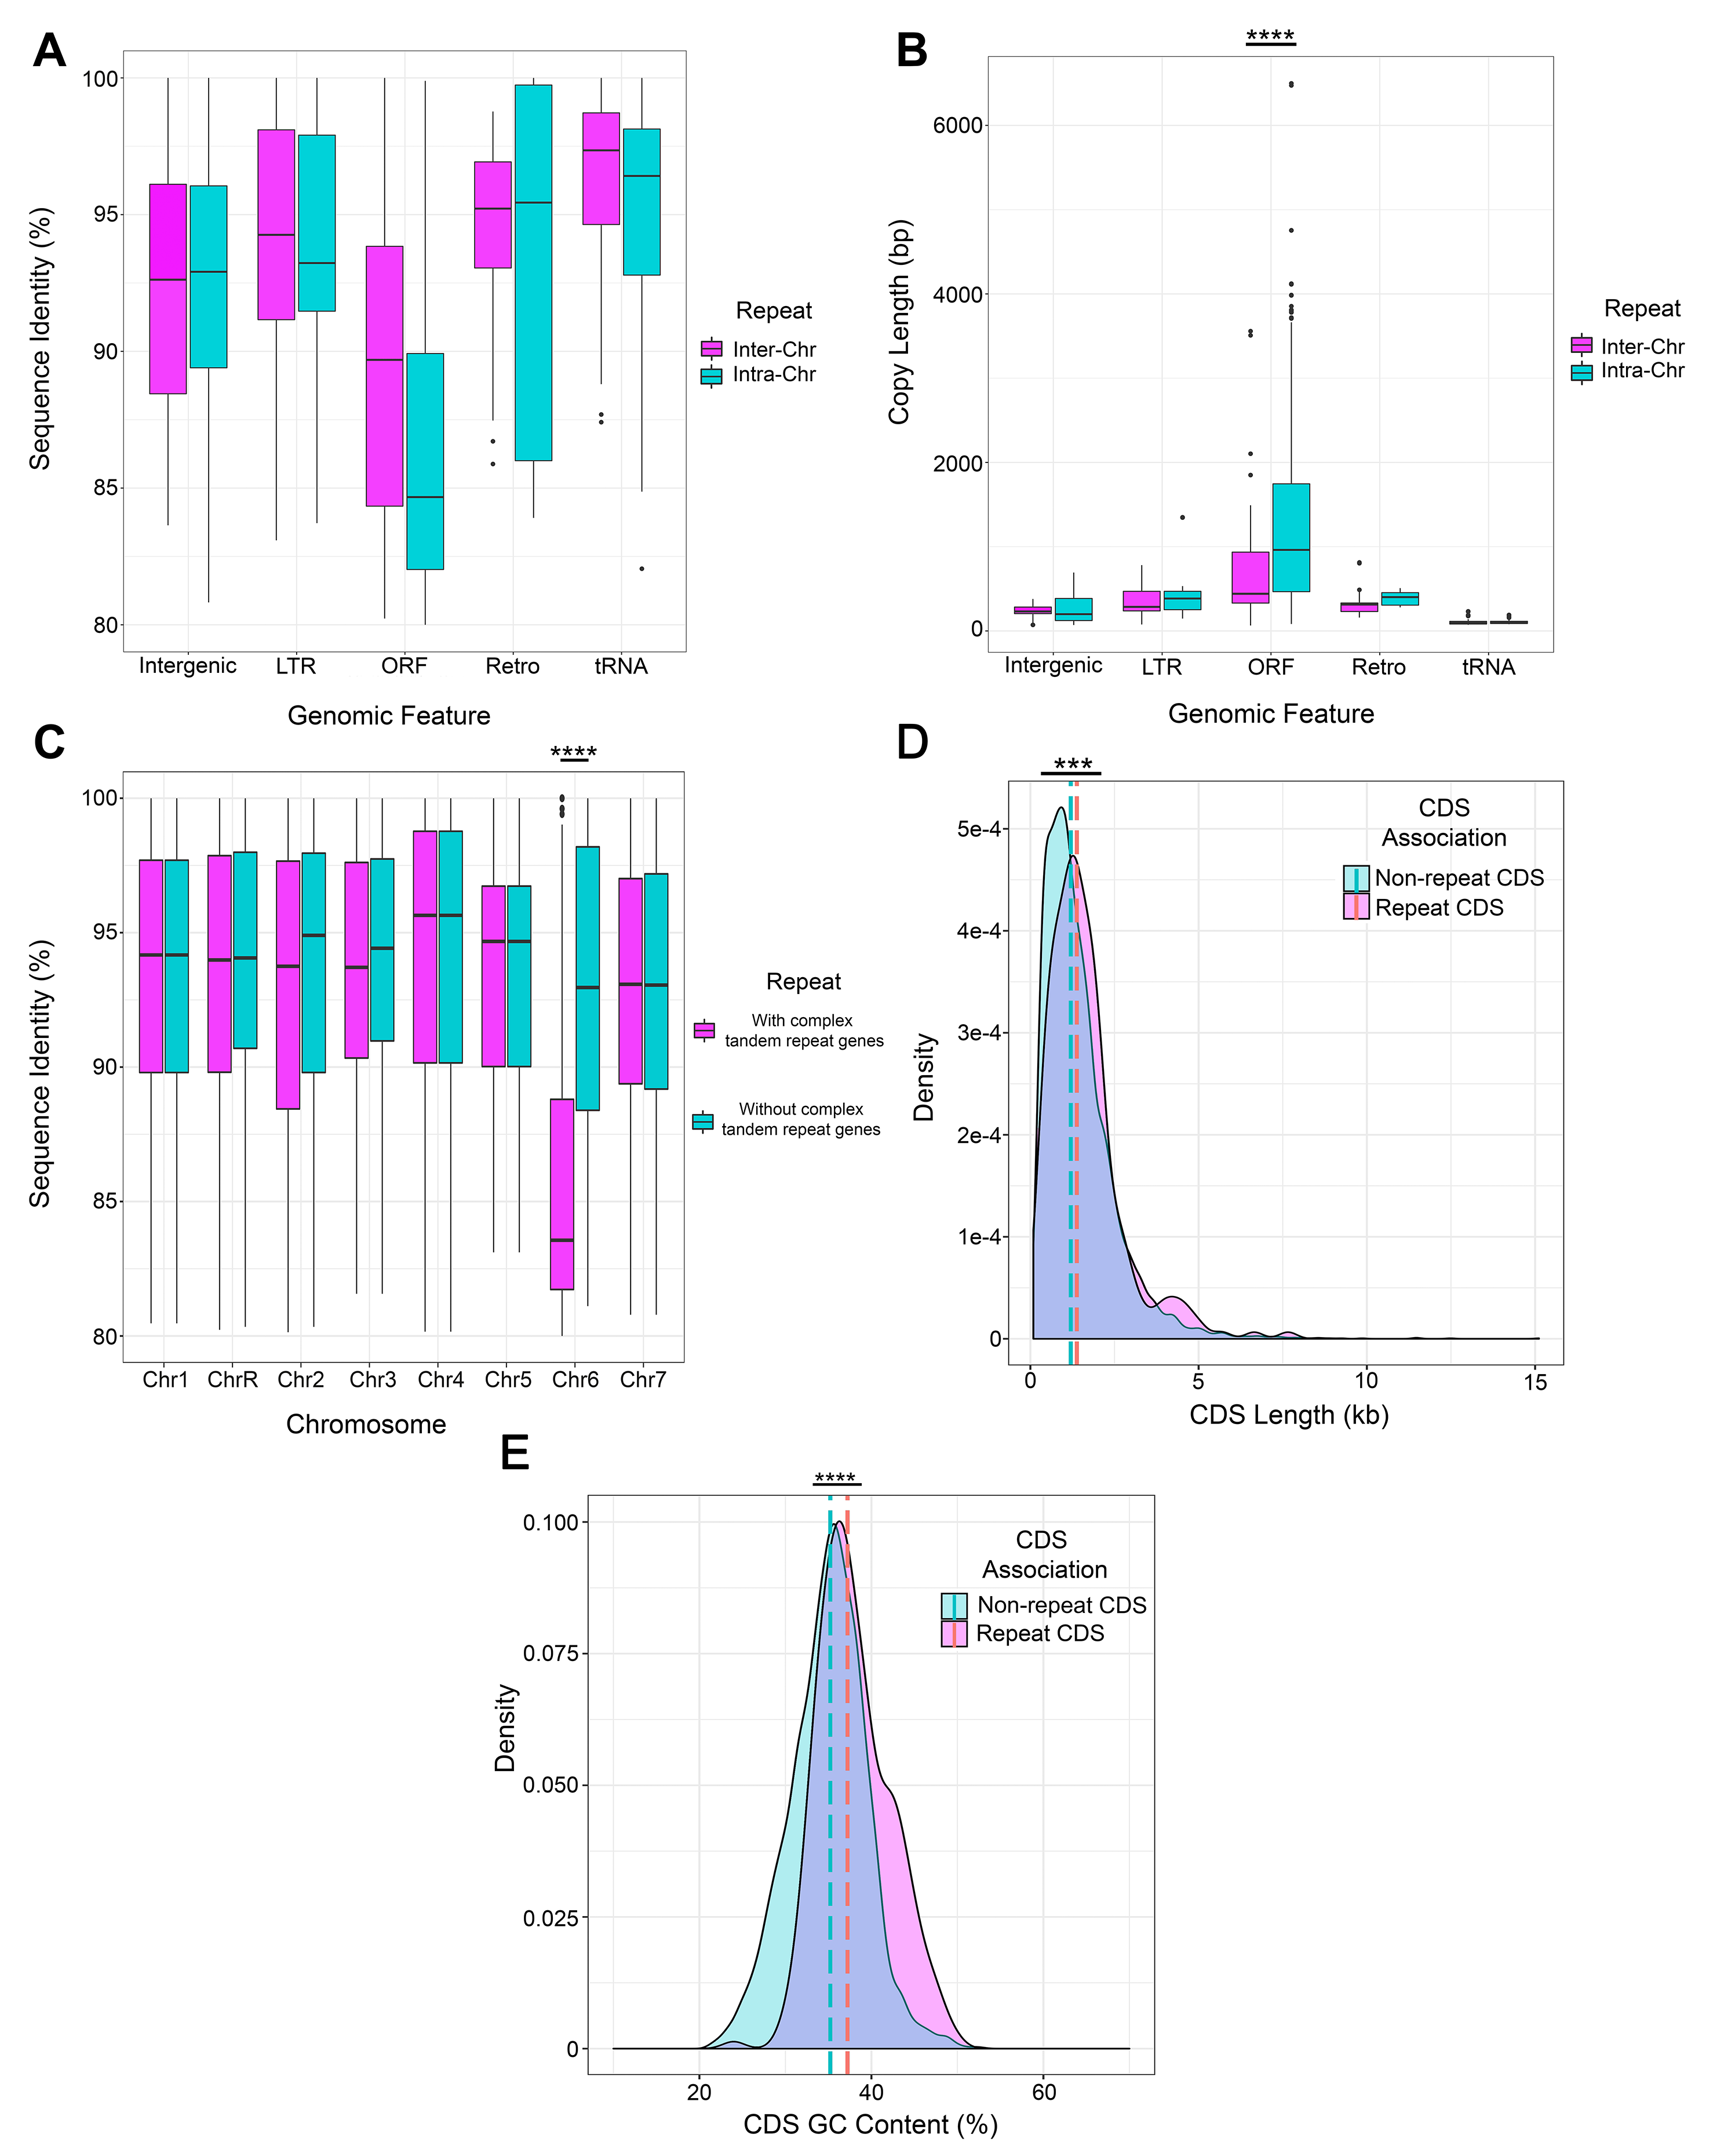

Supplement: supp [file elife-45954-supp-v1.zip › elife_poa_e45954_Figure_2_figure_supplement_3.tif]
